# Supplementary material for: Development and validation of dynamic models to predict postdischarge mortality risk in patients with acute myocardial infarction: results from China Acute Myocardial Infarction Registry
Source: PubMed Central journal article supplement — BMJ Open. 2023 Mar 28;13(3):e069505. doi: 10.1136/bmjopen-2022-069505 (PMC10069604; doi:10.1136/bmjopen-2022-069505), 2023-03-28

## Supplemental Materials

**Junxing Lv et al. Development and validation of dynamic models to predict post-discharge mortality risk in patients with acute myocardial infarction: results from China Acute Myocardial Infarction registry.**

### I. Supplemental Tables.

**Supplemental Table 1. Number of missing values for selected predictors in derivation and validation cohorts.**

**Supplemental Table 2. Baseline characteristics, medications, and outcomes of cohorts for developing and validating 30-day prognostic model.**

**Supplemental Table 3. Baseline characteristics, medications, and outcomes of cohorts for developing and validating 2-year prognostic model.**

**Supplemental Table 4. Univariable analysis of 30-day mortality.**

**Supplemental Table 5. Univariable analysis of mortality after 30 days.**

**Supplemental Table 6. Discrimination of 30-day prognostic nomogram in subgroups of patients.**

**Supplemental Table 7. Discrimination of 2-year prognostic nomogram in subgroups of patients.**

### II. Supplemental Figures.

**Supplemental Figure 1. Flowchart of this study.** AMI, acute myocardial infarction.

**Supplemental Figure 2. Martingale residual plots for testing the linearity assumption before developing the 30-day model.** LVEF, left ventricular ejection fraction.

**Supplemental Figure 3. Martingale residual plots for testing the linearity assumption before developing the 2-year model.** LVEF, left ventricular ejection fraction.

**Supplemental Figure 4. Schoenfeld residual plots for testing the proportional hazards assumption before developing the 30-day model.** LVEF, left ventricular ejection fraction; PCI, percutaneous coronary intervention; HF, heart failure; reMI, recurrent myocardial infarction.

**Supplemental Figure 5. Schoenfeld residual plots for testing the proportional hazards assumption before developing the 2-year model.** LVEF, left ventricular ejection fraction; HF, heart failure; AMI, acute myocardial infarction; PCI, percutaneous coronary intervention.

**Supplemental Figure 6. Kaplan-Meier curve for patients after AMI hospitalization.** AMI, acute myocardial infarction.

**Supplemental Figure 7. Density plots for all-cause death and recurrent myocardial infarction during follow-up.** (A) Density plot for all-cause death. (B) Density plot for recurrent myocardial infarction.

**Supplemental Figure 8. Variable selection by LASSO method for 30-day prognostic model in imputation dataset 1.** (A) The plot showing partial likelihood deviance values versus  $\log(\lambda)$ . Tuning parameter  $\lambda$  selection used 10-fold cross-validation. The vertical lines were drawn at optimal values by the minimum criteria and the 1 SE of minimum criteria. The lambda with 1 SE of minimum deviance was used for variable selection. (B) The coefficient profile plot. The plot was produced against the  $\log(\lambda)$  sequence. LASSO, least absolute shrinkage and selection operator; SE, standard error.

**Supplemental Figure 9. Variable selection by LASSO method for 30-day prognostic model in imputation dataset 2.** (A) The plot showing partial likelihood deviance values versus  $\log(\lambda)$ . Tuning parameter  $\lambda$  selection used 10-fold cross-validation. The vertical lines were drawn at optimal values by the minimum criteria and the 1 SE of minimum criteria. The lambda with 1 SE of minimum deviance was used for variable selection. (B) The coefficient profile plot. The plot was produced against the  $\log(\lambda)$  sequence. LASSO, least absolute shrinkage and selection operator; SE, standard error.

**Supplemental Figure 10. Variable selection by LASSO method for 30-day prognostic model in imputation dataset 3.** (A) The plot showing partial likelihood deviance values versus  $\log(\lambda)$ . Tuning parameter  $\lambda$  selection used 10-fold cross-validation. The vertical lines were drawn at optimal values by the minimum criteria and the 1 SE of minimum criteria. The

lambda with 1 SE of minimum deviance was used for variable selection. (B) The coefficient profile plot. The plot was produced against the  $\log(\lambda)$  sequence. LASSO, least absolute shrinkage and selection operator; SE, standard error.

**Supplemental Figure 11. Variable selection by LASSO method for 30-day prognostic model in imputation dataset 4.** (A) The plot showing partial likelihood deviance values versus  $\log(\lambda)$ . Tuning parameter  $\lambda$  selection used 10-fold cross-validation. The vertical lines were drawn at optimal values by the minimum criteria and the 1 SE of minimum criteria. The lambda with 1 SE of minimum deviance was used for variable selection. (B) The coefficient profile plot. The plot was produced against the  $\log(\lambda)$  sequence. LASSO, least absolute shrinkage and selection operator; SE, standard error.

**Supplemental Figure 12. Variable selection by LASSO method for 30-day prognostic model in imputation dataset 5.** (A) The plot showing partial likelihood deviance values versus  $\log(\lambda)$ . Tuning parameter  $\lambda$  selection used 10-fold cross-validation. The vertical lines were drawn at optimal values by the minimum criteria and the 1 SE of minimum criteria. The lambda with 1 SE of minimum deviance was used for variable selection. (B) The coefficient profile plot. The plot was produced against the  $\log(\lambda)$  sequence. LASSO, least absolute shrinkage and selection operator; SE, standard error.

**Supplemental Figure 13. Relative importance of selected predictors for 30-day mortality.** Relative importance of variables selected by LASSO method was ranked according to the proportion of explainable log-likelihood ratio  $\chi^2$  statistics. LASSO, least absolute shrinkage and selection operator; Mi, myocardial ischemia; MI, myocardial infarction; PCI, percutaneous coronary intervention; LVEF, left ventricular ejection fraction; HF, heart failure.

**Supplemental Figure 14. Variable selection by LASSO method for 2-year prognostic model in imputation dataset 1.** (A) The plot showing partial likelihood deviance values versus  $\log(\lambda)$ . Tuning parameter  $\lambda$  selection used 10-fold cross-validation. The vertical lines were drawn at values by the minimum criteria and the 1 SE of minimum criteria. The lambda with 1 SE of minimum deviance was used for variable selection. (B) The coefficient profile plot. The plot was produced against the  $\log(\lambda)$  sequence. LASSO, least absolute shrinkage and selection operator; SE, standard error.

**Supplemental Figure 15. Variable selection by LASSO method for 2-year prognostic model in imputation dataset 2.** (A) The plot showing partial likelihood deviance values versus  $\log(\lambda)$ . Tuning parameter  $\lambda$  selection used 10-fold cross-validation. The vertical lines were drawn at values by the minimum criteria and the 1 SE of minimum criteria. The lambda with 1 SE of minimum deviance was used for variable selection. (B) The coefficient profile plot. The plot was produced against the  $\log(\lambda)$  sequence. LASSO, least absolute shrinkage and selection operator; SE, standard error.

**Supplemental Figure 16. Variable selection by LASSO method for 2-year prognostic model in imputation dataset 3.** (A) The plot showing partial likelihood deviance values versus  $\log(\lambda)$ . Tuning parameter  $\lambda$  selection used 10-fold cross-validation. The vertical lines were drawn at optimal values by the minimum criteria and the 1 SE of minimum criteria. The lambda with 1 SE of minimum deviance was used for variable selection. (B) The coefficient profile plot. The plot was produced against the  $\log(\lambda)$  sequence. LASSO, least absolute shrinkage and selection operator; SE, standard error.

**Supplemental Figure 17. Variable selection by LASSO method for 2-year prognostic model in imputation dataset 4.** (A) The plot showing partial likelihood deviance values versus  $\log(\lambda)$ . Tuning parameter  $\lambda$  selection used 10-fold cross-validation. The vertical lines were drawn at optimal values by the minimum criteria and the 1 SE of minimum criteria. The lambda with 1 SE of minimum deviance was used for variable selection. (B) The coefficient profile plot. The plot was produced against the  $\log(\lambda)$  sequence. LASSO, least absolute shrinkage and selection operator; SE, standard error.

**Supplemental Figure 18. Variable selection by LASSO method for 2-year prognostic model in imputation dataset 5.** (A) The plot showing partial likelihood deviance values versus  $\log(\lambda)$ . Tuning parameter  $\lambda$  selection used 10-fold cross-validation. The vertical lines were drawn at optimal values by the minimum criteria and the 1 SE of minimum criteria. The lambda with 1 SE of minimum deviance was used for variable selection. (B) The coefficient profile plot. The plot was produced against the  $\log(\lambda)$  sequence. LASSO, least absolute shrinkage and selection operator; SE, standard error.

**Supplemental Figure 19. Relative importance of selected predictors for 2-year mortality.** Relative importance of variables selected by LASSO method was ranked according to the proportion of explainable log-likelihood ratio  $\chi^2$  statistics. LASSO, least absolute shrinkage and selection operator; HF, heart failure; AMI, acute myocardial infarction; LVEF, left ventricular ejection fraction; PCI, percutaneous coronary intervention.

**Supplemental Figure 20. Comparisons of clinical utility between models with or without adverse events and medications.** The red and green lines represent the assumption that all or none patients at high risk with different thresholds. The lines in the upper right represent the risk prediction models. (A) Comparison of clinical utility between 30-day model with or without adverse events and medications. (B) Comparison of clinical utility between 2-year model with or without adverse events and medications.

**Supplemental Figure 21. Comparisons of clinical utility between models with or without hospital level.** The red and green lines represent the assumption that all or none patients at high risk with different thresholds. The lines in the upper right represent the risk prediction models. (A) Comparison of clinical utility between 30-day model with or without hospital

level. (B) Comparison of clinical utility between 2-year model with or without hospital level.

**Supplemental Figure 22. Comparisons of clinical utility between models and GRACE 1.0 score.** The red and green lines represent the assumption that all or none patients at high risk with different thresholds. The lines in the upper right represent the risk prediction models. (A) Comparison of clinical utility between 30-day model and GRACE 1.0 score. (B) Comparison of clinical utility between 2-year model and GRACE 1.0 score. GRACE, Global Registry of Acute Coronary Events.

**Supplemental Figure 23. Comparisons of clinical utility between models and GRACE 2.0 score.** The red and green lines represent the assumption that all or none patients at high risk with different thresholds. The lines in the upper right represent the risk prediction models. (A) Comparison of clinical utility between 30-day model and GRACE 2.0 score. (B) Comparison of clinical utility between 2-year model and GRACE 2.0 score. GRACE, Global Registry of Acute Coronary Events.

**Supplemental Figure 24. Calibration curves of 30-day prognostic nomogram.** Calibration curves present the relationship between observed and predicted survival probabilities by 30-day prognostic nomogram in both derivation and validation cohorts. (A) Calibration curve of 30-day prognostic nomogram in derivation cohort. (B) Calibration curve of 30-day prognostic nomogram in validation cohort.

**Supplemental Figure 25. Calibration curves of 2-year prognostic nomogram.** Calibration curves present the relationship between observed and predicted survival probabilities by 2-year prognostic nomogram in both derivation and validation cohorts. (A) Calibration curve of 2-year prognostic nomogram in derivation cohort. (B) Calibration curve of 2-year prognostic nomogram in validation cohort.

**I. Supplemental Tables.****Supplemental Table 1. Number of missing values for selected predictors in derivation and validation cohorts**

|                                             | Number of missing values (%) |
|---------------------------------------------|------------------------------|
| <b>Derivation cohort</b>                    |                              |
| 30-day prognostic model                     |                              |
| Age                                         | 336 (2.1)                    |
| Prior stroke                                | 820 (5.1)                    |
| Heart rate                                  | 391 (2.5)                    |
| Killip class                                | 395 (2.5)                    |
| LVEF                                        | 3370 (21.2)                  |
| In-hospital PCI                             | 435 (2.7)                    |
| In-hospital recurrent myocardial ischemia   | 518 (3.3)                    |
| In-hospital recurrent myocardial infarction | 518 (3.3)                    |
| In-hospital heart failure                   | 502 (3.2)                    |
| Antiplatelet therapy at discharge           | 849 (5.3)                    |
| Statins at discharge                        | 849 (5.3)                    |
| 2-year prognostic model                     |                              |
| Age                                         | 242 (2.0)                    |
| Prior renal dysfunction                     | 510 (4.2)                    |
| History of heart failure                    | 490 (4.0)                    |
| AMI classification                          | 0 (0.0)                      |
| Heart rate                                  | 107 (0.9)                    |
| Killip class                                | 114 (0.9)                    |
| Hemoglobin                                  | 327 (2.7)                    |
| LVEF                                        | 2307 (19.0)                  |
| In-hospital PCI                             | 130 (1.1)                    |
| In-hospital heart failure                   | 155 (1.3)                    |
| Heart failure worsening within 30 days      | 8 (0.1)                      |
| Antiplatelet therapy within 30 days         | 0 (0.0)                      |
| $\beta$ blockers within 30 days             | 0 (0.0)                      |
| Statins within 30 days                      | 0 (0.0)                      |

**Validation cohort**

## 30-day prognostic model

|                                             |             |
|---------------------------------------------|-------------|
| Age                                         | 144 (1.8)   |
| Prior stroke                                | 404 (5.1)   |
| Heart rate                                  | 197 (2.5)   |
| Killip class                                | 176 (2.2)   |
| LVEF                                        | 1678 (21.1) |
| In-hospital PCI                             | 216 (2.7)   |
| In-hospital recurrent myocardial ischemia   | 267 (3.4)   |
| In-hospital recurrent myocardial infarction | 261 (3.3)   |
| In-hospital heart failure                   | 254 (3.2)   |
| Antiplatelet therapy at discharge           | 416 (5.2)   |
| Statins at discharge                        | 416 (5.2)   |

## 2-year prognostic model

|                                        |             |
|----------------------------------------|-------------|
| Age                                    | 106 (1.7)   |
| Prior renal dysfunction                | 260 (4.3)   |
| History of heart failure               | 254 (4.2)   |
| AMI classification                     | 0 (0.0)     |
| Heart rate                             | 75 (1.2)    |
| Killip class                           | 54 (0.9)    |
| Hemoglobin                             | 135 (2.2)   |
| LVEF                                   | 1161 (19.1) |
| In-hospital PCI                        | 60 (1.0)    |
| In-hospital heart failure              | 83 (1.4)    |
| Heart failure worsening within 30 days | 9 (0.1)     |
| Antiplatelet therapy within 30 days    | 0 (0.0)     |
| $\beta$ blockers within 30 days        | 0 (0.0)     |
| Statins within 30 days                 | 0 (0.0)     |

LVEF, left ventricular ejection fraction; PCI, percutaneous coronary intervention; AMI, acute myocardial infarction.

**Supplemental Table 2. Baseline characteristics, medications, and outcomes of cohorts for developing and validating 30-day prognostic model**

| Variables                         | Derivation cohort<br>(n=15925) | Validation cohort<br>(n=7962) |
|-----------------------------------|--------------------------------|-------------------------------|
| <b>Demographics</b>               |                                |                               |
| Age, yrs                          | 62.27±12.36                    | 62.54±12.29                   |
| Female                            | 3878 (24.4)                    | 1940 (24.4)                   |
| BMI, kg/m <sup>2</sup>            | 24.13±3.05                     | 24.08±3.04                    |
| <b>Medical history</b>            |                                |                               |
| Diabetes                          | 2943 (19.6)                    | 1505 (20.0)                   |
| Hypertension                      | 7873 (51.2)                    | 3897 (50.8)                   |
| Hyperlipidemia                    | 1154 (8.5)                     | 569 (8.3)                     |
| Current smoker                    | 7083 (45.7)                    | 3483 (44.8)                   |
| Prior angina pectoris             | 4044 (27.8)                    | 1994 (27.4)                   |
| Prior myocardial infarction       | 1083 (7.4)                     | 553 (7.5)                     |
| Prior heart failure               | 329 (2.2)                      | 169 (2.3)                     |
| Prior stroke                      | 1330 (8.8)                     | 711 (9.4)                     |
| Prior peripheral artery disease   | 96 (0.6)                       | 46 (0.6)                      |
| Prior PCI                         | 753 (5.0)                      | 381 (5.1)                     |
| Prior CABG                        | 56 (0.4)                       | 36 (0.5)                      |
| Prior renal dysfunction           | 197 (1.3)                      | 94 (1.3)                      |
| COPD                              | 279 (1.9)                      | 142 (1.9)                     |
| <b>Presenting characteristics</b> |                                |                               |
| Symptom onset to admission time   |                                |                               |
| 0-6h                              | 7398 (47.0)                    | 3625 (46.0)                   |
| >6h                               | 8330 (53.0)                    | 4247 (54.0)                   |
| Heart rate, beats/min             | 77±18                          | 78±18                         |
| Systolic blood pressure           | 129.48±25.01                   | 129.94±25.26                  |
| Killip class                      |                                |                               |
| I                                 | 11836 (76.2)                   | 5903 (75.8)                   |
| II-IV                             | 3694 (23.8)                    | 1883 (24.2)                   |
| Cardiac arrest at admission       | 128 (0.8)                      | 77 (1.0)                      |



|                                              |                       |                       |
|----------------------------------------------|-----------------------|-----------------------|
| <b>AMI classification</b>                    |                       |                       |
| STEMI                                        | 12051 (75.7)          | 5991 (75.2)           |
| NSTEMI                                       | 3874 (24.3)           | 1971 (24.8)           |
| Anterior wall involvement                    | 7406 (47.7)           | 3696 (47.5)           |
| <b>Laboratory results</b>                    |                       |                       |
| Creatinine, $\mu\text{mol/L}$                | 74.90 (62.00, 90.00)  | 74.60 (62.00, 90.40)  |
| Creatinine clearance, ml/min                 | 83.83 (61.61, 109.00) | 83.70 (61.52, 108.71) |
| Hemoglobin, g/L                              | 136.23 $\pm$ 21.09    | 136.07 $\pm$ 20.94    |
| Leukocyte count, $\times 10^9/\text{L}$      | 10.09 $\pm$ 3.69      | 10.04 $\pm$ 3.60      |
| LVEF, %                                      | 53.84 $\pm$ 10.07     | 53.81 $\pm$ 10.08     |
| <b>In-hospital treatment</b>                 |                       |                       |
| PCI                                          | 8951 (57.9)           | 4432 (57.2)           |
| CABG                                         | 127 (0.8)             | 76 (1.0)              |
| <b>Adverse events during hospitalization</b> |                       |                       |
| New-onset heart failure                      | 2082 (13.5)           | 1035 (13.4)           |
| Recurrent myocardial ischemia                | 384 (2.5)             | 166 (2.2)             |
| Recurrent myocardial infarction              | 61 (0.4)              | 22 (0.3)              |
| Stroke                                       | 90 (0.6)              | 40 (0.5)              |
| Other bleeding events                        | 236 (1.5)             | 121 (1.6)             |
| <b>Medications at discharge</b>              |                       |                       |
| Antiplatelet therapy                         |                       |                       |
| Dual antiplatelet therapy                    | 13212 (87.6)          | 6571 (87.1)           |
| Single antiplatelet therapy                  | 1261 (8.4)            | 648 (8.6)             |
| None                                         | 603 (4.0)             | 327 (4.3)             |
| Statins                                      | 13846 (91.8)          | 6976 (92.4)           |
| $\beta$ blockers                             | 10341 (68.6)          | 5006 (66.3)           |
| ACEI/ARB                                     | 8642 (57.3)           | 4326 (57.3)           |
| <b>Hospital level</b>                        |                       |                       |
| Province level                               | 5516 (34.6)           | 2728 (34.3)           |
| Prefecture level                             | 8740 (54.9)           | 4371 (54.9)           |
| County level                                 | 1668 (10.5)           | 863 (10.8)            |

Values are shown as mean  $\pm$  standard deviation, median (interquartile range), or number (%)

without imputation of missing data. BMI, body mass index; PCI, percutaneous coronary intervention; CABG, coronary artery bypass graft; COPD, chronic obstructive pulmonary disease; AMI, acute myocardial infarction; STEMI, ST-segment elevation myocardial infarction; NSTEMI, non-ST-segment elevation myocardial infarction; LVEF, left ventricular ejection fraction; ACEI, angiotensin converting enzyme inhibitor; ARB, angiotensin II receptor blocker.

**Supplemental Table 3. Baseline characteristics, medications, and outcomes of cohorts for developing and validating 2-year prognostic model**

| Variables                         | Derivation cohort (n=12136) | Validation cohort (n=6067) |
|-----------------------------------|-----------------------------|----------------------------|
| <b>Demographics</b>               |                             |                            |
| Age, yrs                          | 62.08±12.28                 | 62.26±12.20                |
| Female                            | 2967 (24.4)                 | 1459 (24.0)                |
| BMI, kg/m <sup>2</sup>            | 24.12±3.02                  | 24.11±3.01                 |
| <b>Medical history</b>            |                             |                            |
| Diabetes                          | 2213 (19.0)                 | 1146 (19.6)                |
| Hypertension                      | 6021 (50.6)                 | 3011 (50.7)                |
| Hyperlipidemia                    | 760 (7.2)                   | 382 (7.2)                  |
| Current smoker                    | 5565 (46.3)                 | 2737 (45.5)                |
| Prior angina pectoris             | 3173 (28.0)                 | 1571 (27.8)                |
| Prior myocardial infarction       | 821 (7.2)                   | 420 (7.3)                  |
| Prior heart failure               | 243 (2.1)                   | 120 (2.1)                  |
| Prior stroke                      | 1038 (8.8)                  | 572 (9.7)                  |
| Prior peripheral artery disease   | 72 (0.6)                    | 30 (0.5)                   |
| Prior PCI                         | 562 (4.8)                   | 293 (5.0)                  |
| Prior CABG                        | 38 (0.3)                    | 25 (0.4)                   |
| Prior renal dysfunction           | 130 (1.1)                   | 56 (1.0)                   |
| COPD                              | 221 (1.9)                   | 114 (2.0)                  |
| <b>Presenting characteristics</b> |                             |                            |
| Symptom onset to admission time   |                             |                            |
| 0-6h                              | 5725 (47.6)                 | 2798 (46.5)                |
| >6h                               | 6298 (52.4)                 | 3216 (53.5)                |
| Heart rate, beats/min             | 77±18                       | 78±18                      |
| Systolic blood pressure           | 129.61±25.30                | 130.00±25.52               |
| Killip class                      |                             |                            |
| I                                 | 9163 (76.2)                 | 4589 (76.3)                |
| II-IV                             | 2859 (23.8)                 | 1424 (23.7)                |
| Cardiac arrest at admission       | 95 (0.8)                    | 62 (1.0)                   |
| AMI classification                |                             |                            |

|                                              |                       |                       |
|----------------------------------------------|-----------------------|-----------------------|
| STEMI                                        | 9215 (75.9)           | 4560 (75.2)           |
| NSTEMI                                       | 2921 (24.1)           | 1507 (24.8)           |
| Anterior wall involvement                    | 5743 (47.7)           | 2843 (47.2)           |
| <b>Laboratory results</b>                    |                       |                       |
| Creatinine, $\mu\text{mol/L}$                | 74.00 (61.80, 89.10)  | 73.90 (61.40, 89.60)  |
| Creatinine clearance, ml/min                 | 84.53 (62.60, 109.58) | 84.92 (63.22, 110.16) |
| Hemoglobin, g/L                              | 136.37 $\pm$ 20.82    | 136.39 $\pm$ 20.79    |
| Leukocyte count, $\times 10^9/\text{L}$      | 10.09 $\pm$ 3.65      | 10.02 $\pm$ 3.52      |
| LVEF, %                                      | 54.08 $\pm$ 10.00     | 54.01 $\pm$ 9.94      |
| <b>In-hospital treatment</b>                 |                       |                       |
| In-hospital PCI                              | 6998 (58.4)           | 3468 (57.7)           |
| In-hospital CABG                             | 87 (0.7)              | 50 (0.8)              |
| <b>Adverse events during hospitalization</b> |                       |                       |
| New-onset heart failure                      | 1616 (13.5)           | 805 (13.5)            |
| Recurrent myocardial ischemia                | 281 (2.3)             | 125 (2.1)             |
| Recurrent myocardial infarction              | 37 (0.3)              | 18 (0.3)              |
| Stroke                                       | 65 (0.5)              | 29 (0.5)              |
| Other bleeding events                        | 183 (1.5)             | 94 (1.6)              |
| <b>Medications within 30 days</b>            |                       |                       |
| Antiplatelet therapy                         |                       |                       |
| Dual antiplatelet therapy                    | 10518 (86.7)          | 5287 (87.1)           |
| Single antiplatelet therapy                  | 1292 (10.6)           | 610 (10.1)            |
| None                                         | 326 (2.7)             | 170 (2.8)             |
| Statins                                      | 11486 (94.6)          | 5736 (94.5)           |
| $\beta$ blockers                             | 8751 (72.1)           | 4347 (71.6)           |
| ACEI/ARB                                     | 7221 (59.5)           | 3591 (59.2)           |
| <b>Hospital level</b>                        |                       |                       |
| Province level                               | 3876 (31.9)           | 1956 (32.2)           |
| Prefecture level                             | 6947 (57.2)           | 3461 (57.0)           |
| County level                                 | 1313 (10.8)           | 650 (10.7)            |

Values are shown as mean  $\pm$  standard deviation, median (interquartile range), or number (%) without imputation of missing data. BMI, body mass index; PCI, percutaneous coronary

intervention; CABG, coronary artery bypass graft; COPD, chronic obstructive pulmonary disease; AMI, acute myocardial infarction; STEMI, ST-segment elevation myocardial infarction; NSTEMI, non-ST-segment elevation myocardial infarction; LVEF, left ventricular ejection fraction; ACEI, angiotensin converting enzyme inhibitor; ARB, angiotensin II receptor blocker.

**Supplemental Table 4. Univariable analysis of 30-day mortality**

|                                                   | <b>Unadjusted HR (95% CI)</b> | <b>P value</b> |
|---------------------------------------------------|-------------------------------|----------------|
| Age (per 1 year increase)                         | 1.066 (1.052, 1.080)          | <0.0001        |
| Women (vs men)                                    | 1.662 (1.233, 2.241)          | 0.0009         |
| BMI (per 1kg/m <sup>2</sup> increase)             | 0.893 (0.850, 0.939)          | <0.0001        |
| Diabetes (vs no)                                  | 1.545 (1.123, 2.126)          | 0.0075         |
| Hypertension (vs no)                              | 1.289 (0.958, 1.734)          | 0.0930         |
| Hyperlipidemia (vs no)                            | 0.749 (0.406, 1.384)          | 0.3547         |
| Current smoking (vs no)                           | 0.406 (0.293, 0.563)          | <0.0001        |
| Prior angina pectoris (vs no)                     | 1.324 (0.972, 1.803)          | 0.0754         |
| Prior myocardial infarction (vs no)               | 1.177 (0.709, 1.954)          | 0.5284         |
| Prior heart failure (vs no)                       | 5.078 (3.166, 8.144)          | <0.0001        |
| Prior stroke (vs no)                              | 2.627 (1.842, 3.747)          | <0.0001        |
| Prior PCI (vs no)                                 | 0.814 (0.400, 1.659)          | 0.5717         |
| Prior CABG (vs no)                                | —                             | —              |
| Prior renal dysfunction (vs no)                   | 1.596 (0.587, 4.338)          | 0.3591         |
| COPD (vs no)                                      | 3.208 (1.744, 5.901)          | 0.0002         |
| Prior peripheral artery disease (vs no)           | —                             | —              |
| Symptom onset to admission time (vs 0-6h)         |                               |                |
| >6h                                               | 1.947 (1.431, 2.649)          | <0.0001        |
| Heart rate (per 1 beat increase)                  | 1.024 (1.018, 1.029)          | <0.0001        |
| Systolic blood pressure (per 1mmHg increase)      | 0.994 (0.988, 1.000)          | 0.0358         |
| Killip class (vs I)                               |                               |                |
| II-IV                                             | 3.980 (2.990, 5.298)          | <0.0001        |
| Cardiac arrest at admission (vs no)               | 1.921 (0.614, 6.011)          | 0.2620         |
| NSTEMI (vs STEMI)                                 | 1.230 (0.898, 1.686)          | 0.1977         |
| Anterior wall involvement (vs no)                 | 1.255 (0.943, 1.671)          | 0.1185         |
| Creatinine clearance (vs >90 ml/min)              |                               |                |
| 60-90                                             | 1.805 (1.222, 2.666)          | 0.0030         |
| ≤60                                               | 4.252 (2.985, 6.058)          | <0.0001        |
| Hemoglobin (per 1g/L increase)                    | 0.988 (0.983, 0.993)          | <0.0001        |
| Leukocyte count (per 10 <sup>9</sup> /L increase) | 1.055 (1.023, 1.088)          | 0.0006         |

|                                                                |                        |         |
|----------------------------------------------------------------|------------------------|---------|
| LVEF (per 1% increase)                                         | 0.938 (0.923, 0.952)   | <0.0001 |
| In-hospital PCI (vs no)                                        | 0.220 (0.157, 0.308)   | <0.0001 |
| In-hospital CABG (vs no)                                       | 1.277 (0.317, 5.145)   | 0.7308  |
| New-onset heart failure during hospitalization (vs no)         | 7.204 (5.414, 9.585)   | <0.0001 |
| Recurrent myocardial ischemia during hospitalization (vs no)   | 6.028 (3.938, 9.228)   | <0.0001 |
| Recurrent myocardial infarction during hospitalization (vs no) | 13.299 (6.752, 26.195) | <0.0001 |
| Stroke during hospitalization (vs no)                          | 2.908 (0.934, 9.052)   | 0.0654  |
| Other bleeding events during hospitalization (vs no)           | 4.109 (2.235, 7.558)   | <0.0001 |
| Antiplatelet therapy at discharge (vs dual therapy)            |                        |         |
| Single antiplatelet therapy                                    | 1.344 (0.762, 2.372)   | 0.3024  |
| none                                                           | 5.158 (3.468, 7.672)   | <0.0001 |
| Statins at discharge (vs no)                                   | 3.180 (2.246, 4.502)   | <0.0001 |
| β blockers at discharge (vs no)                                | 1.483 (1.105, 1.991)   | 0.0087  |
| ACEI/ARB at discharge (vs no)                                  | 1.481 (1.088, 2.017)   | 0.0128  |

---

BMI, body mass index; PCI, percutaneous coronary intervention; CABG, coronary artery bypass graft; COPD, chronic obstructive pulmonary disease; NSTEMI, non-ST-segment elevation myocardial infarction; STEMI, ST-segment elevation myocardial infarction; LVEF, left ventricular ejection fraction; ACEI, angiotensin converting enzyme inhibitor; ARB, angiotensin II receptor blocker; HR, hazard ratio; CI, confidence interval.

**Supplemental Table 5. Univariable analysis of mortality after 30 days**

|                                                   | <b>Unadjusted HR (95% CI)</b> | <b>P value</b> |
|---------------------------------------------------|-------------------------------|----------------|
| Age (per 1 year increase)                         | 1.084 (1.076, 1.092)          | <0.0001        |
| Women (vs men)                                    | 1.947 (1.679, 2.259)          | <0.0001        |
| BMI (per 1kg/m <sup>2</sup> increase)             | 0.895 (0.872, 0.919)          | <0.0001        |
| Diabetes (vs no)                                  | 1.571 (1.328, 1.857)          | <0.0001        |
| Hypertension (vs no)                              | 1.533 (1.321, 1.779)          | <0.0001        |
| Hyperlipidemia (vs no)                            | 0.631 (0.443, 0.900)          | 0.0111         |
| Current smoking (vs no)                           | 0.423 (0.359, 0.498)          | <0.0001        |
| Prior angina pectoris (vs no)                     | 1.318 (1.131, 1.536)          | 0.0004         |
| Prior myocardial infarction (vs no)               | 2.064 (1.657, 2.570)          | <0.0001        |
| Prior heart failure (vs no)                       | 5.964 (4.685, 7.594)          | <0.0001        |
| Prior stroke (vs no)                              | 2.013 (1.651, 2.455)          | <0.0001        |
| Prior PCI (vs no)                                 | 1.122 (0.817, 1.540)          | 0.4770         |
| Prior CABG (vs no)                                | 1.656 (0.618, 4.433)          | 0.3156         |
| Prior renal dysfunction (vs no)                   | 4.383 (2.969, 6.470)          | <0.0001        |
| COPD (vs no)                                      | 2.897 (2.076, 4.044)          | <0.0001        |
| Prior peripheral artery disease (vs no)           | 2.273 (1.197, 4.314)          | 0.0122         |
| Symptom onset to admission time (vs 0-6h)         |                               |                |
| >6h                                               | 1.497 (1.287, 1.742)          | <0.0001        |
| Heart rate (per 1 beat increase)                  | 1.021 (1.018, 1.024)          | <0.0001        |
| Systolic blood pressure (per 1mmHg increase)      | 1.005 (1.002, 1.008)          | 0.0005         |
| Killip class (vs I)                               |                               |                |
| II-IV                                             | 3.225 (2.792, 3.726)          | <0.0001        |
| Cardiac arrest at admission (vs no)               | 1.068 (0.478, 2.388)          | 0.8724         |
| NSTEMI (vs STEMI)                                 | 2.395 (2.070, 2.771)          | <0.0001        |
| Anterior wall involvement (vs no)                 | 1.210 (1.047, 1.398)          | 0.0096         |
| Creatinine clearance (vs >90 ml/min)              |                               |                |
| 60-90                                             | 1.725 (1.405, 2.119)          | <0.0001        |
| ≤60                                               | 5.193 (4.328, 6.231)          | <0.0001        |
| Hemoglobin (per 1g/L increase)                    | 0.980 (0.978, 0.983)          | <0.0001        |
| Leukocyte count (per 10 <sup>9</sup> /L increase) | 1.010 (0.990, 1.030)          | 0.3333         |



|                                                                    |                      |         |
|--------------------------------------------------------------------|----------------------|---------|
| LVEF (per 1% increase)                                             | 0.948 (0.941, 0.955) | <0.0001 |
| In-hospital PCI (vs no)                                            | 0.207 (0.175, 0.246) | <0.0001 |
| In-hospital CABG (vs no)                                           | 0.421 (0.106, 1.674) | 0.2184  |
| New-onset heart failure during hospitalization (vs no)             | 3.418 (2.932, 3.984) | <0.0001 |
| Recurrent myocardial ischemia during hospitalization (vs no)       | 2.653 (1.949, 3.610) | <0.0001 |
| Recurrent myocardial infarction during hospitalization (vs no)     | 1.773 (0.659, 4.771) | 0.2565  |
| Stroke during hospitalization (vs no)                              | 3.455 (1.991, 5.996) | <0.0001 |
| Other bleeding events during hospitalization (vs no)               | 2.233 (1.486, 3.356) | 0.0001  |
| Recurrent myocardial infarction within 30 days (vs no)             | 3.032 (1.130-8.134)  | 0.0276  |
| Heart failure worsening within 30 days (vs no)                     | 4.790 (3.631, 6.319) | <0.001  |
| Antiplatelet therapy within 30 days (vs dual antiplatelet therapy) |                      |         |
| Single antiplatelet therapy                                        | 2.147 (1.779, 2.591) | <0.0001 |
| none                                                               | 4.371 (3.385, 5.643) | <0.0001 |
| Statins within 30 days (vs no)                                     | 2.454 (1.960, 3.073) | <0.0001 |
| $\beta$ blockers within 30 days (vs no)                            | 1.594 (1.374, 1.850) | <0.0001 |
| ACEI/ARB within 30 days (vs no)                                    | 1.153 (0.997, 1.333) | 0.0546  |

BMI, body mass index; PCI, percutaneous coronary intervention; CABG, coronary artery bypass graft; COPD, chronic obstructive pulmonary disease; NSTEMI, non-ST-segment elevation myocardial infarction; STEMI, ST-segment elevation myocardial infarction; LVEF, left ventricular ejection fraction; ACEI, angiotensin converting enzyme inhibitor; ARB, angiotensin II receptor blocker; HR, hazard ratio; CI, confidence interval.

**Supplemental Table 6. Discrimination of 30-day prognostic nomogram in subgroups of patients**

| Subgroup         | Sample size | C statistic (95% CI) |
|------------------|-------------|----------------------|
| Age, yrs         |             |                      |
| ≤75              | 4766        | 0.74 (0.65-0.84)     |
| >75              | 935         | 0.83 (0.71-0.94)     |
| Sex              |             |                      |
| Male             | 4359        | 0.79 (0.69-0.88)     |
| Female           | 1342        | 0.75 (0.62-0.88)     |
| Diabetes         |             |                      |
| Yes              | 1106        | 0.81 (0.62-1.00)     |
| No               | 4431        | 0.78 (0.70-0.87)     |
| Diagnosis        |             |                      |
| STEMI            | 4302        | 0.77 (0.68-0.86)     |
| NSTEMI           | 1399        | 0.83 (0.72-0.93)     |
| In-hospital PCI  |             |                      |
| Yes              | 3498        | 0.76 (0.63-0.88)     |
| No               | 2203        | 0.76 (0.66-0.85)     |
| Hospital level   |             |                      |
| Province level   | 1984        | 0.78 (0.66-0.90)     |
| Prefecture level | 3168        | 0.80 (0.70-0.90)     |
| County level     | 549         | 0.74 (0.51-0.97)     |

STEMI, ST-segment elevation myocardial infarction; NSTEMI, non-ST-segment elevation myocardial infarction; PCI, percutaneous coronary intervention; CI, confidence interval.

**Supplemental Table 7. Discrimination of 2-year prognostic nomogram in subgroups of patients**

| Subgroup           | Sample size | C statistic (95% CI) |
|--------------------|-------------|----------------------|
| Age, yrs           |             |                      |
| ≤75                | 3766        | 0.79 (0.75-0.83)     |
| >75                | 695         | 0.66 (0.62-0.71)     |
| Sex                |             |                      |
| Male               | 3412        | 0.83 (0.80-0.86)     |
| Female             | 1049        | 0.75 (0.70-0.80)     |
| Diabetes           |             |                      |
| Yes                | 845         | 0.81 (0.76-0.86)     |
| No                 | 3496        | 0.81 (0.78-0.84)     |
| AMI classification |             |                      |
| STEMI              | 3364        | 0.81 (0.78-0.84)     |
| NSTEMI             | 1097        | 0.81 (0.76-0.85)     |
| In-hospital PCI    |             |                      |
| Yes                | 3104        | 0.82 (0.78-0.87)     |
| No                 | 1357        | 0.72 (0.68-0.76)     |
| Hospital level     |             |                      |
| Province level     | 1460        | 0.83 (0.78-0.88)     |
| Prefecture level   | 2552        | 0.81 (0.77-0.84)     |
| County level       | 449         | 0.78 (0.70-0.85)     |

AMI, acute myocardial infarction; STEMI, ST-segment elevation myocardial infarction; NSTEMI, non-ST-segment elevation myocardial infarction; PCI, percutaneous coronary intervention; CI, confidence interval.

## II. Supplemental Figures.

### Supplemental Figure 1. Flowchart of this study

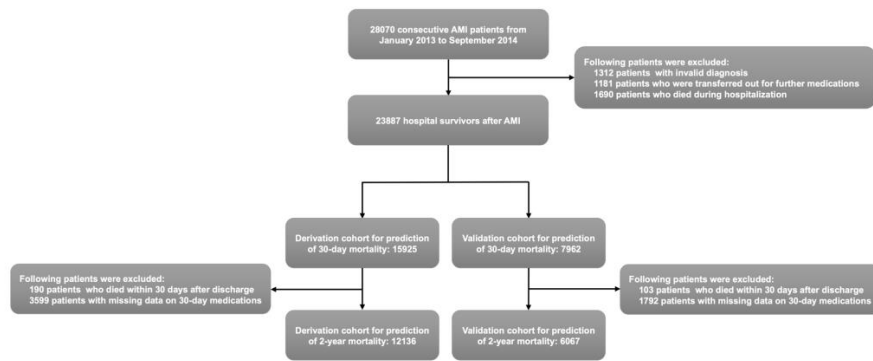

## Supplemental Figure 2. Martingale residual plots for testing the linearity assumption before developing the 30-day model

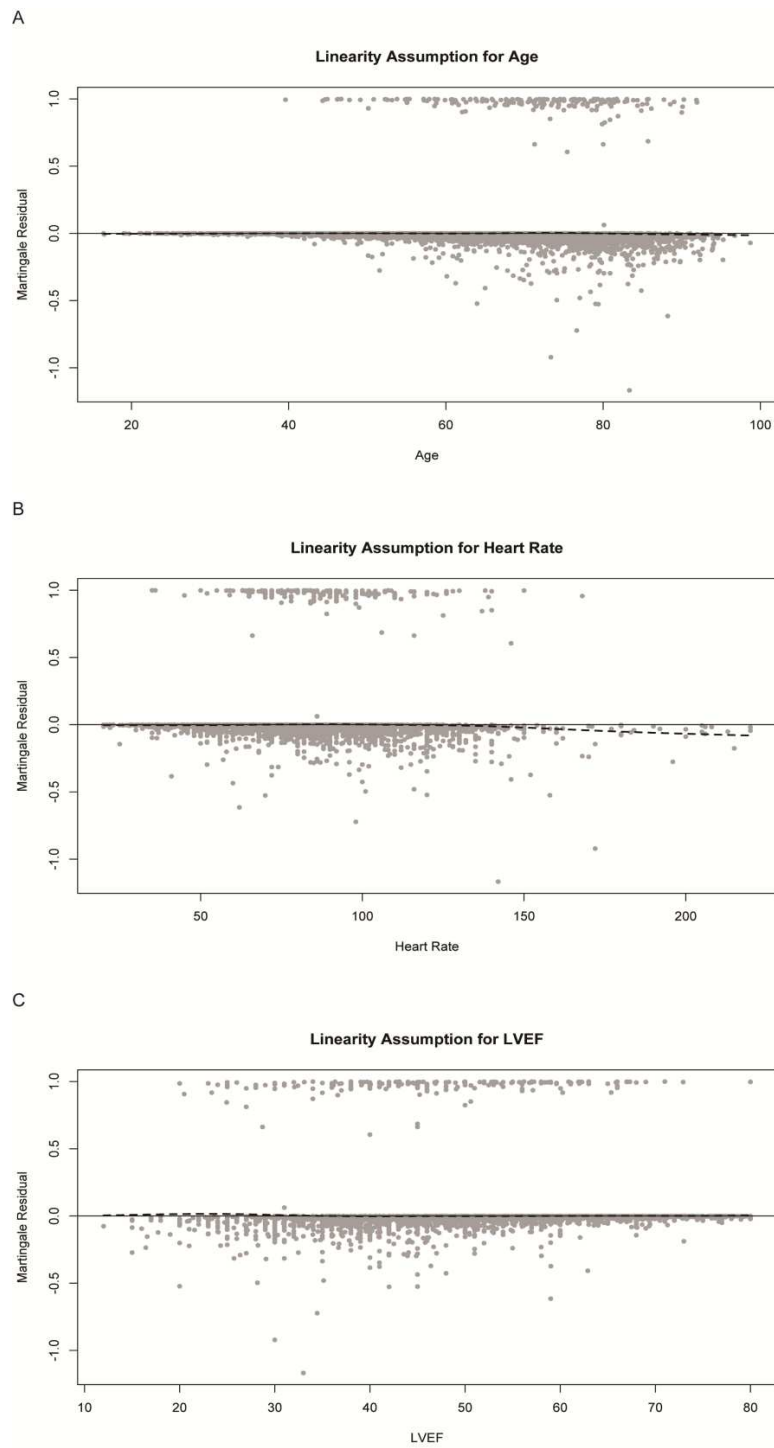



### Supplemental Figure 3. Martingale residual plots for testing the linearity assumption before developing the 2-year model

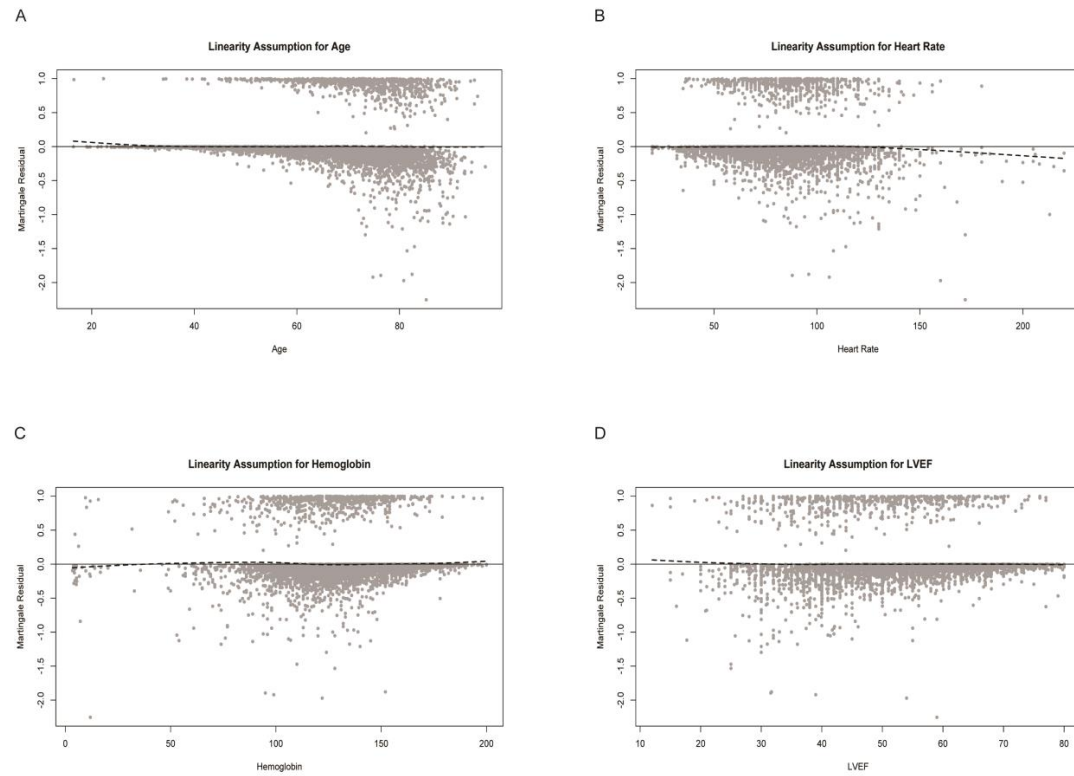

**Supplemental Figure 4. Schoenfeld residual plots for testing the proportional hazards assumption before developing the 30-day model**

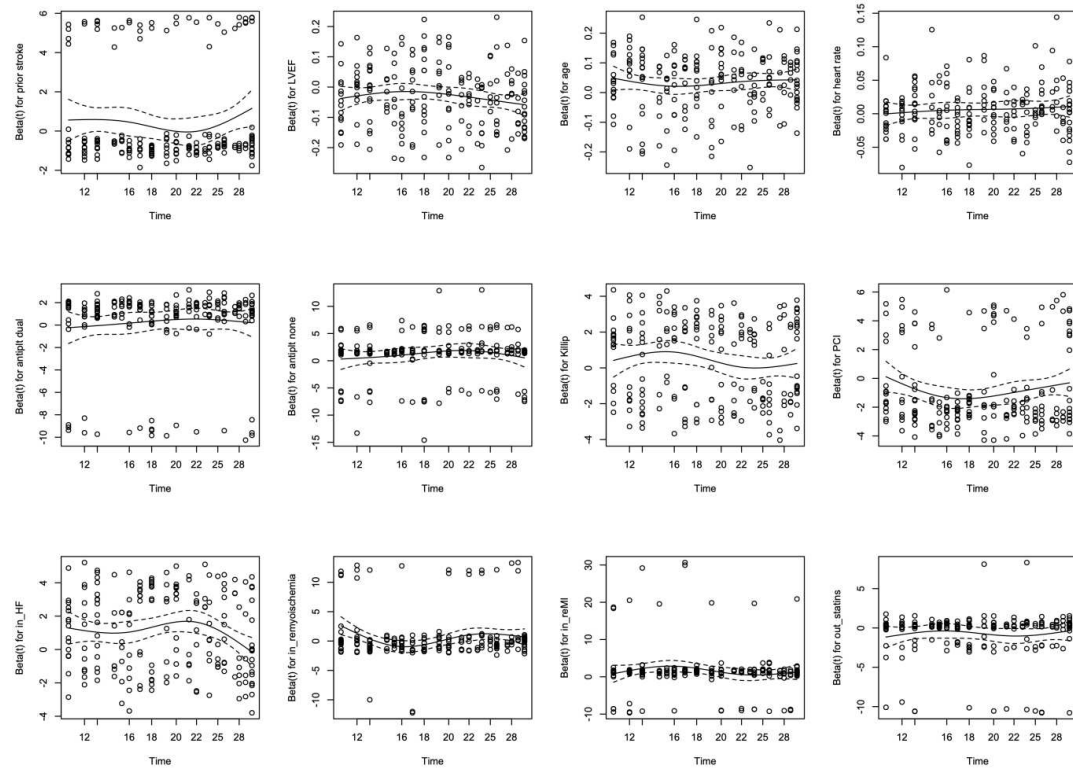



**Supplemental Figure 5. Schoenfeld residual plots for testing the proportional hazards assumption before developing the 2-year model**

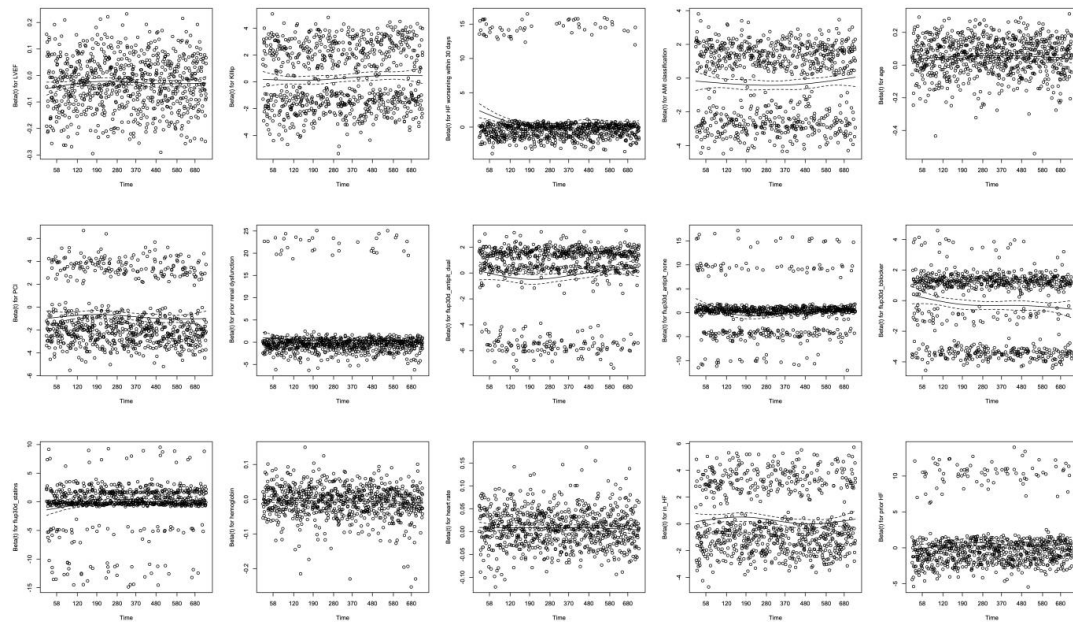

**Supplemental Figure 6. Kaplan-Meier curve for patients after AMI hospitalization**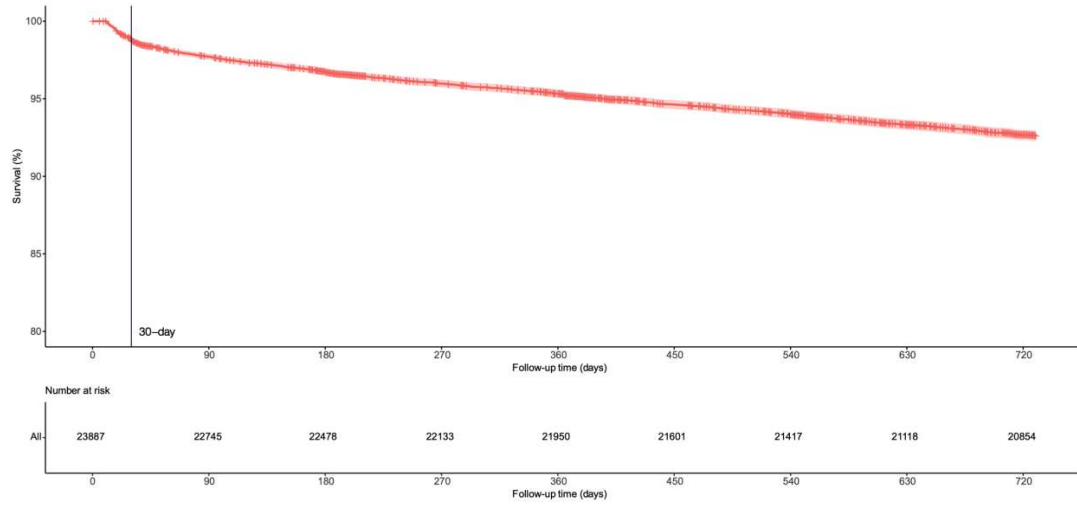

**Supplemental Figure 7. Density plots for all-cause death and recurrent myocardial infarction during follow-up**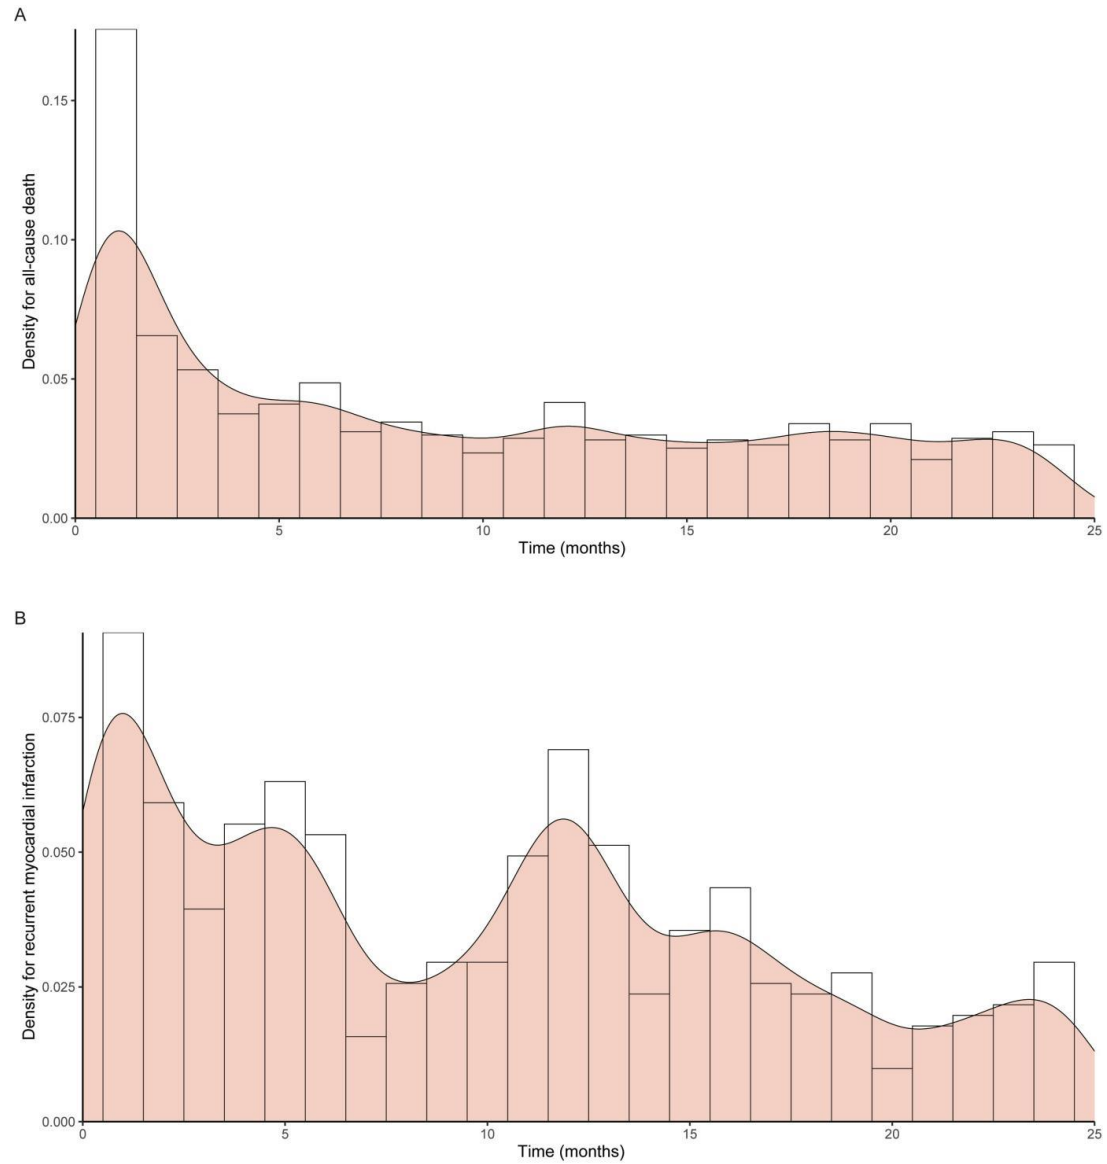

**Supplemental Figure 8. Variable selection by LASSO method for 30-day prognostic model in imputation dataset 1**

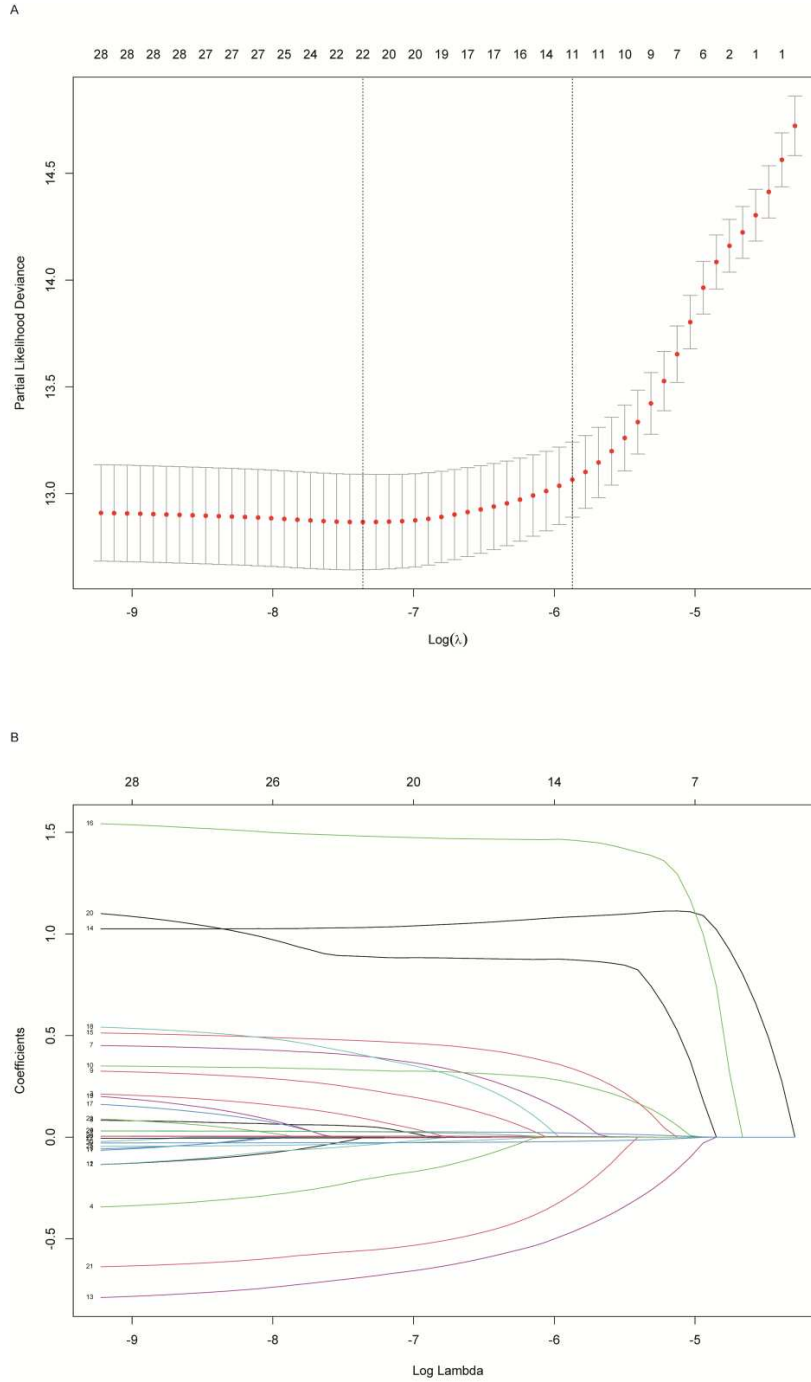

**Supplemental Figure 9. Variable selection by LASSO method for 30-day prognostic model in imputation dataset 2**

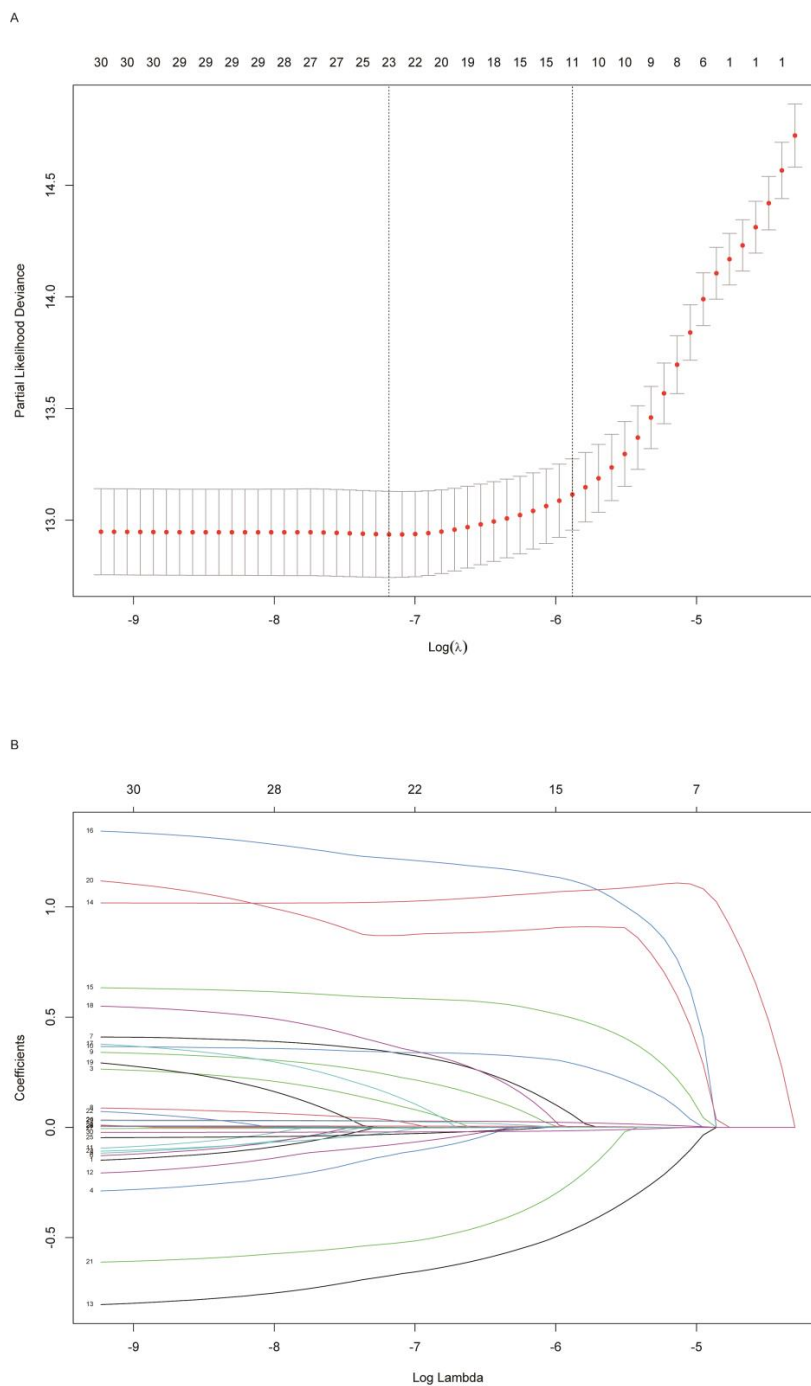

**Supplemental Figure 10. Variable selection by LASSO method for 30-day prognostic model in imputation dataset 3**

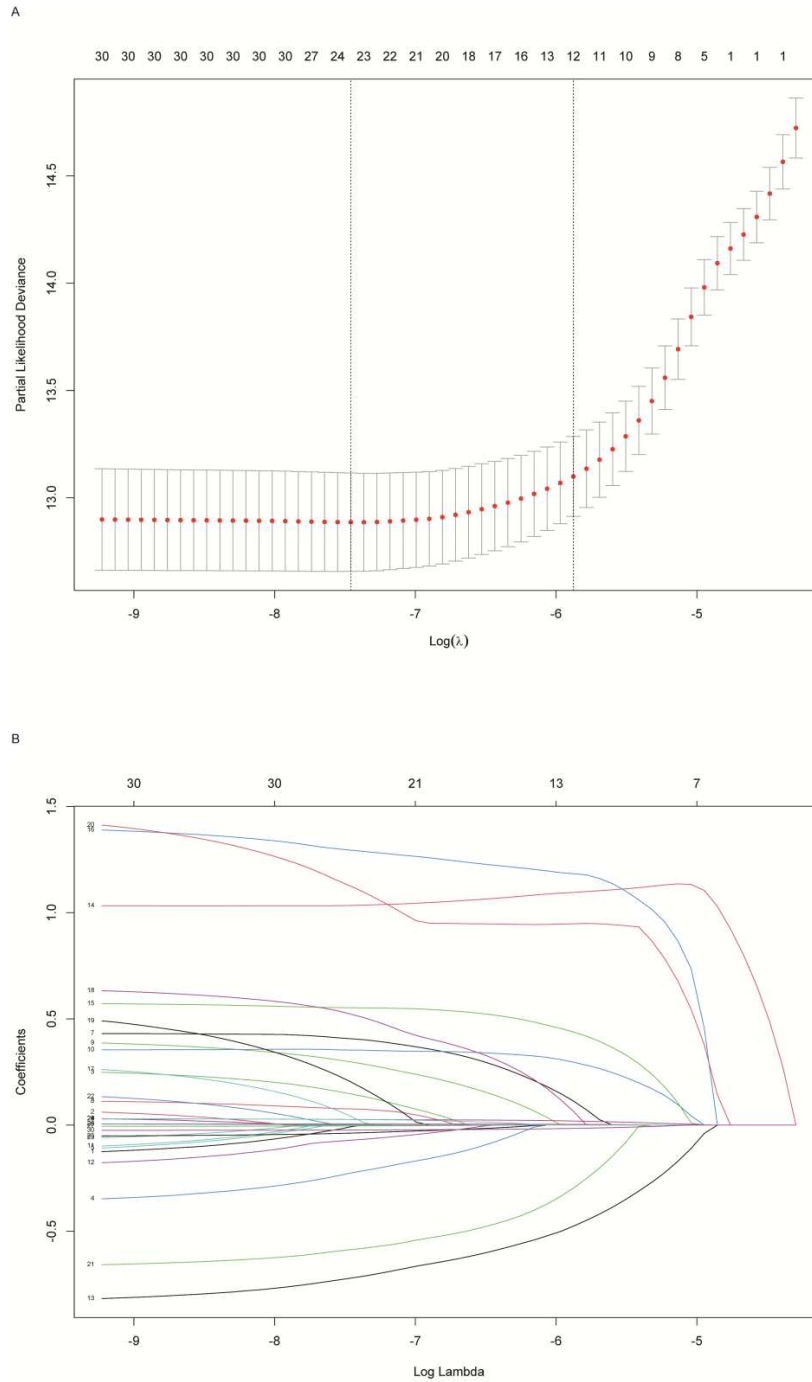

**Supplemental Figure 11. Variable selection by LASSO method for 30-day prognostic model in imputation dataset 4**

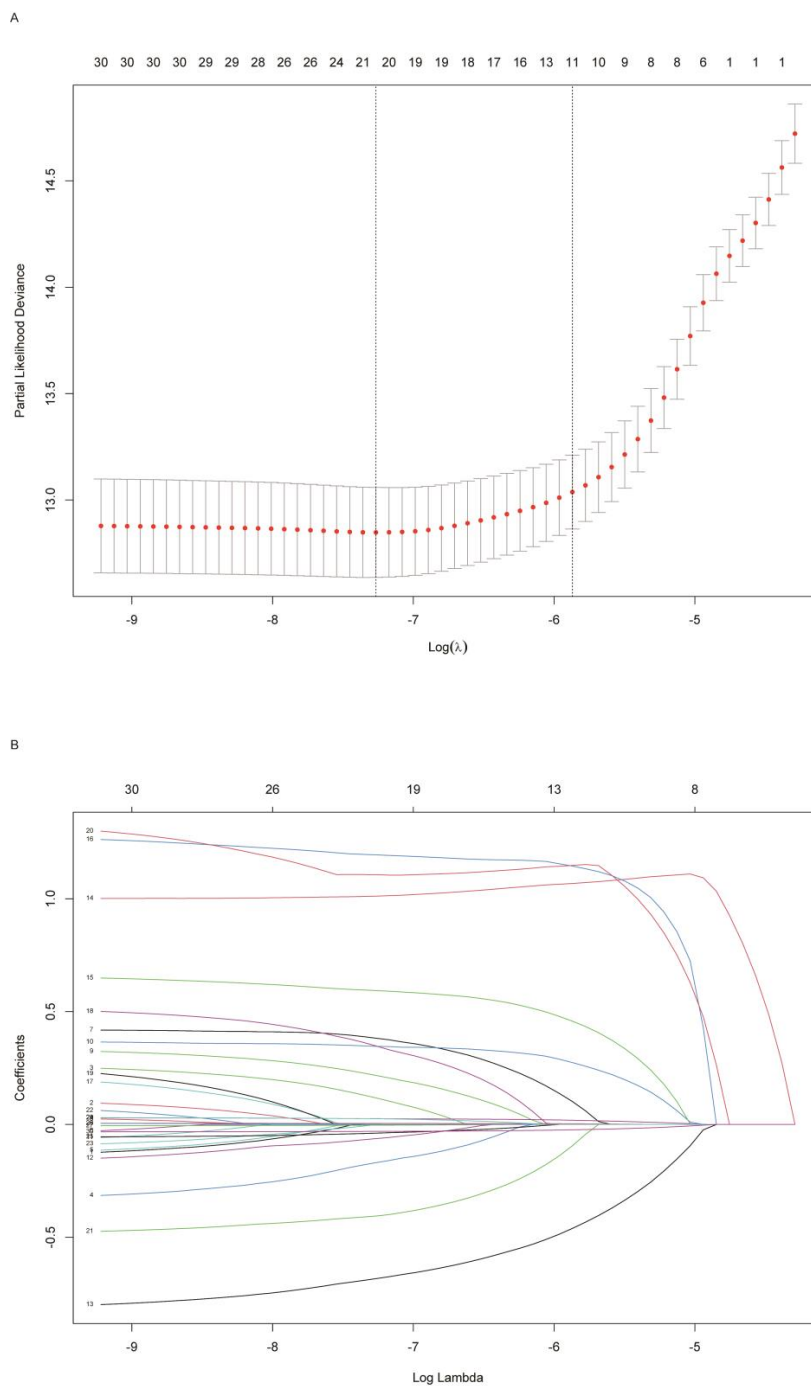

**Supplemental Figure 12. Variable selection by LASSO method for 30-day prognostic model in imputation dataset 5**

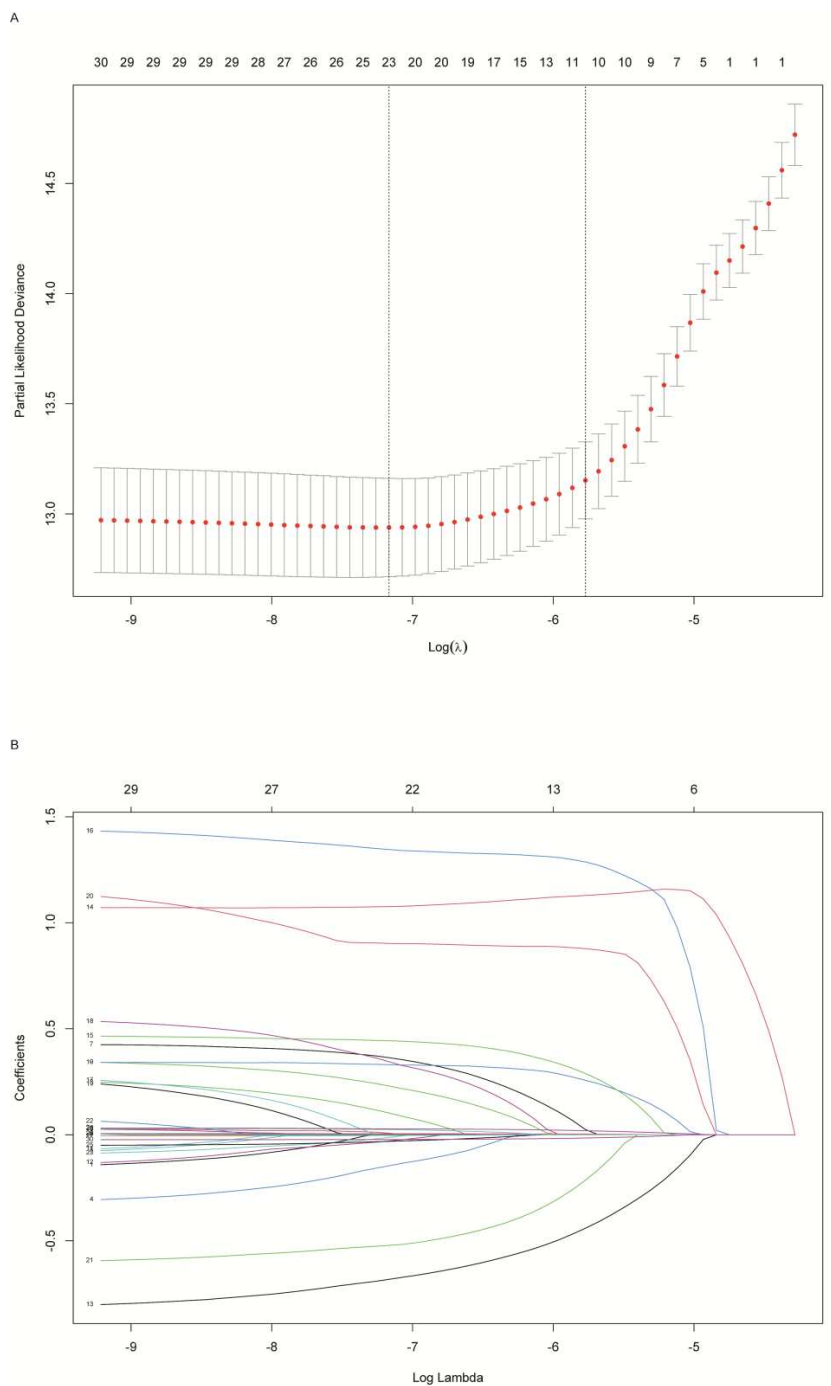



## Supplemental Figure 13. Relative importance of selected predictors for 30-day mortality

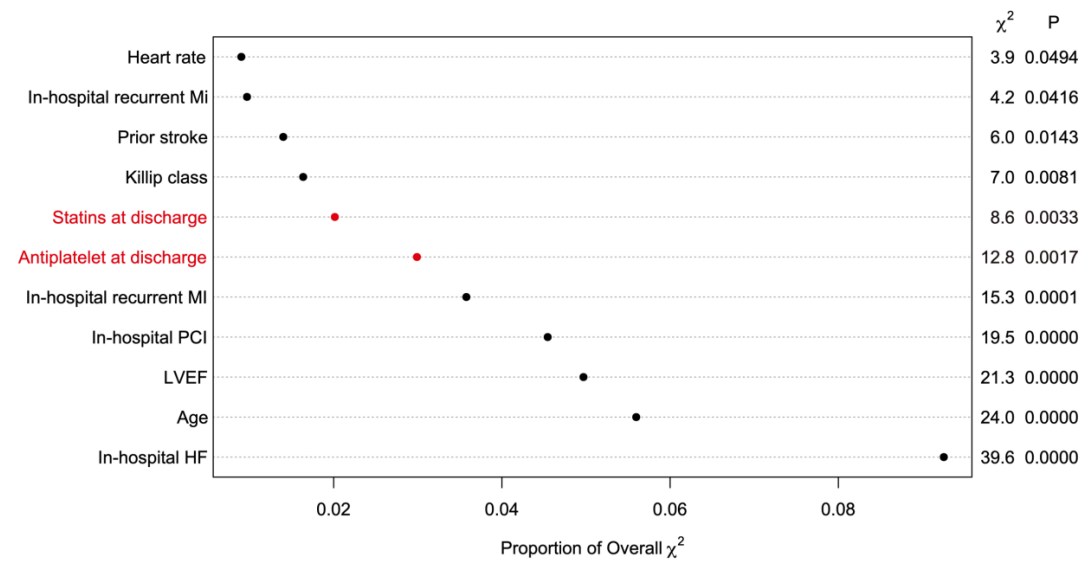

**Supplemental Figure 14. Variable selection by LASSO method for 2-year prognostic model in imputation dataset 1**

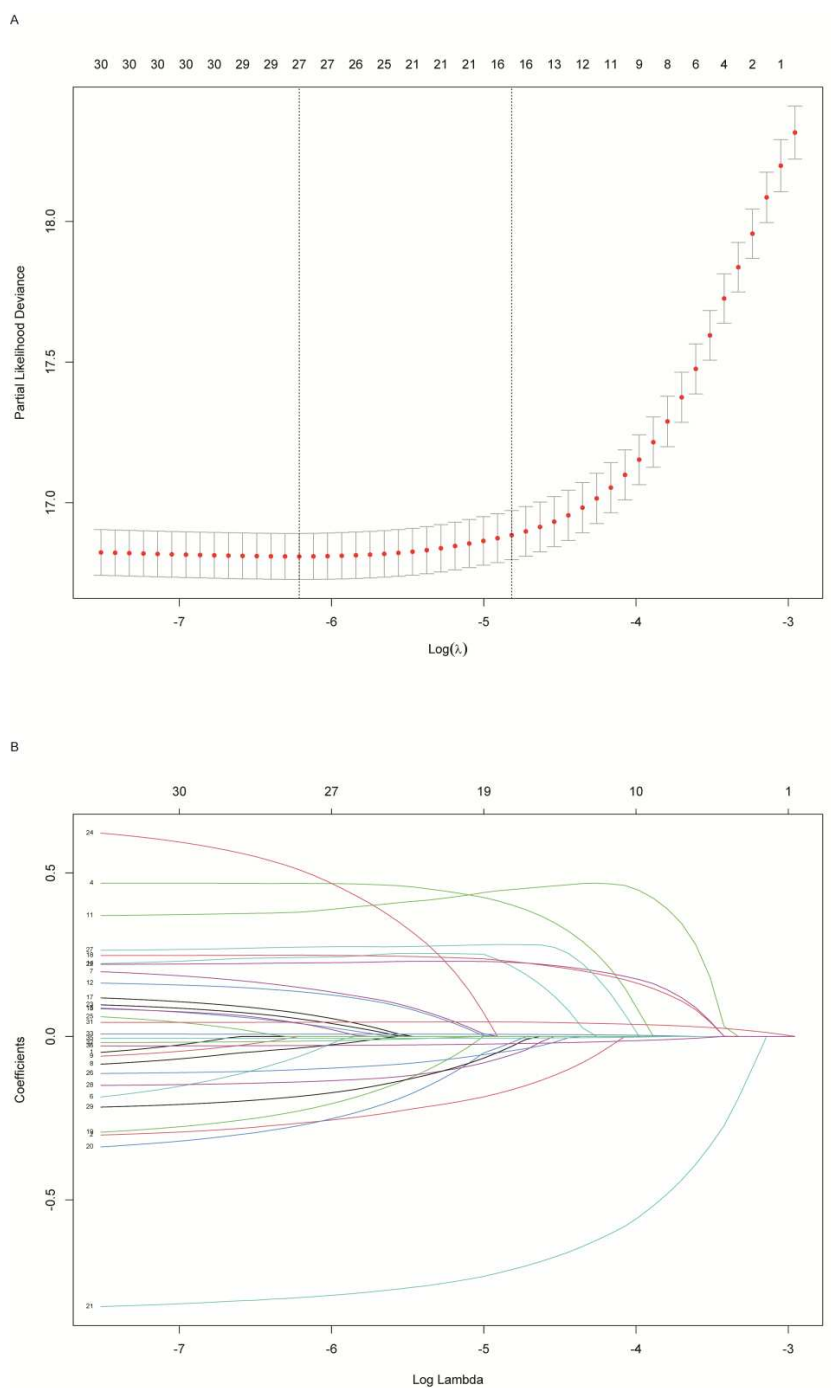

**Supplemental Figure 15. Variable selection by LASSO method for 2-year prognostic model in imputation dataset 2**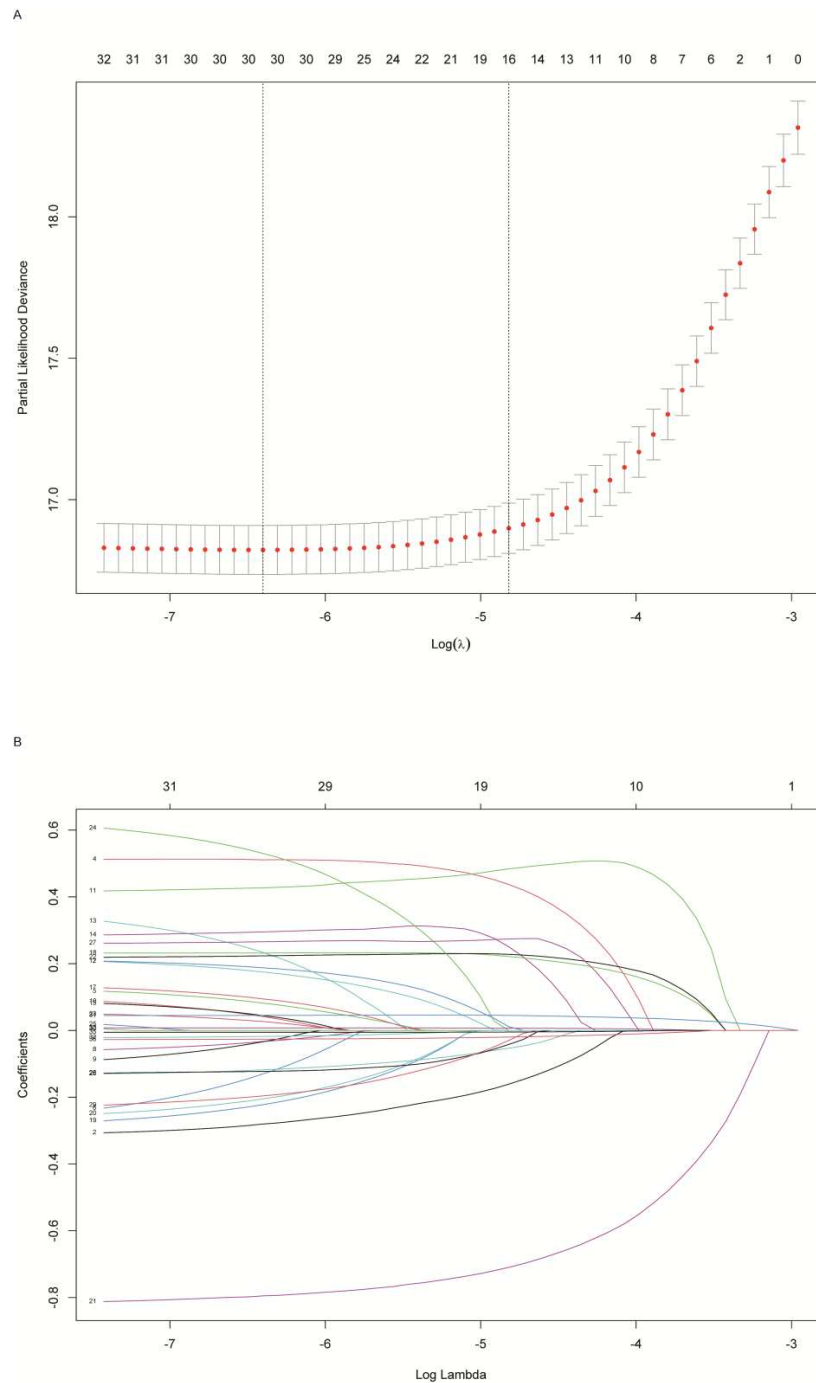

**Supplemental Figure 16. Variable selection by LASSO method for 2-year prognostic model in imputation dataset 3**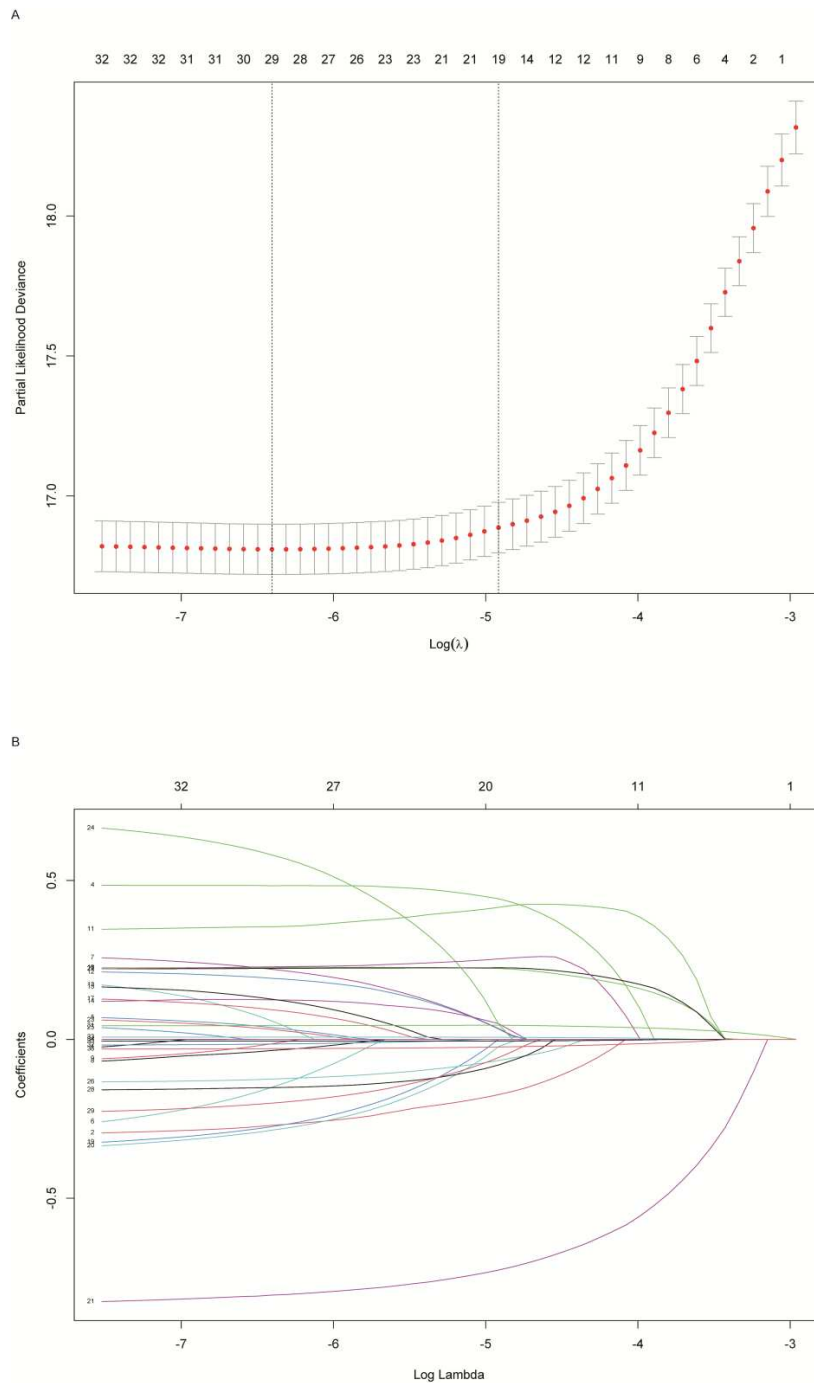

**Supplemental Figure 17. Variable selection by LASSO method for 2-year prognostic model in imputation dataset 4**

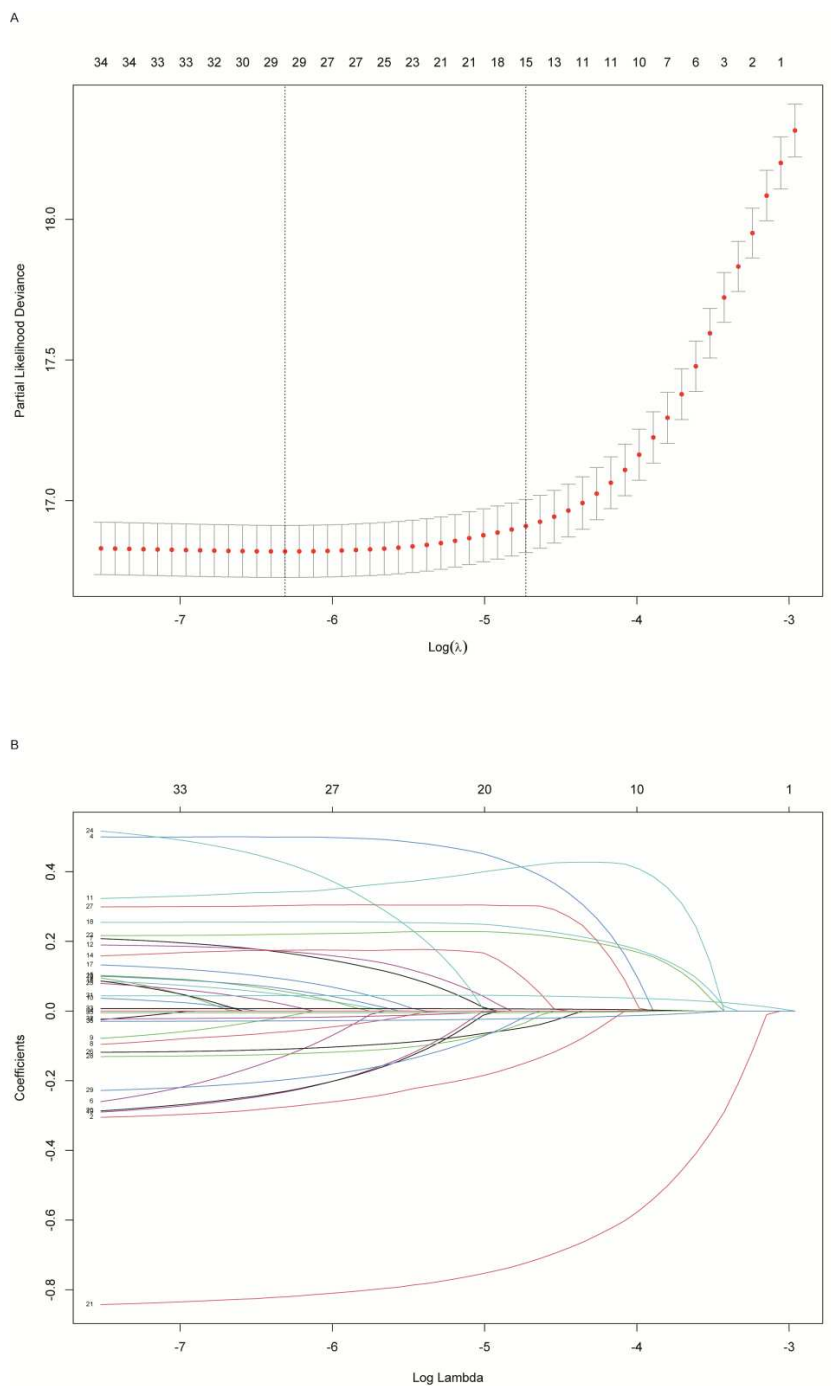

### Supplemental Figure 18. Variable selection by LASSO method for 2-year prognostic model in imputation dataset 5

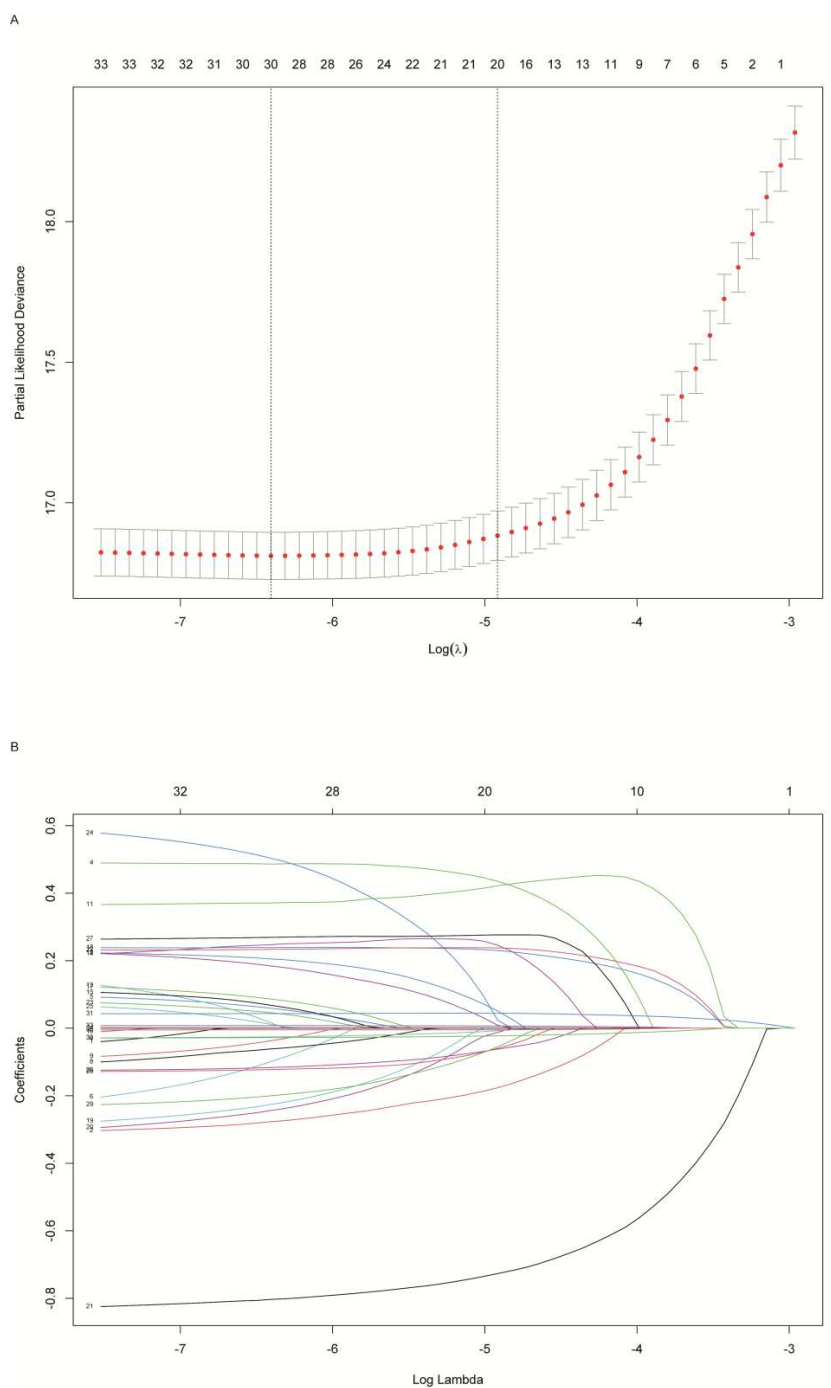

## Supplemental Figure 19. Relative importance of selected predictors for 2-year mortality

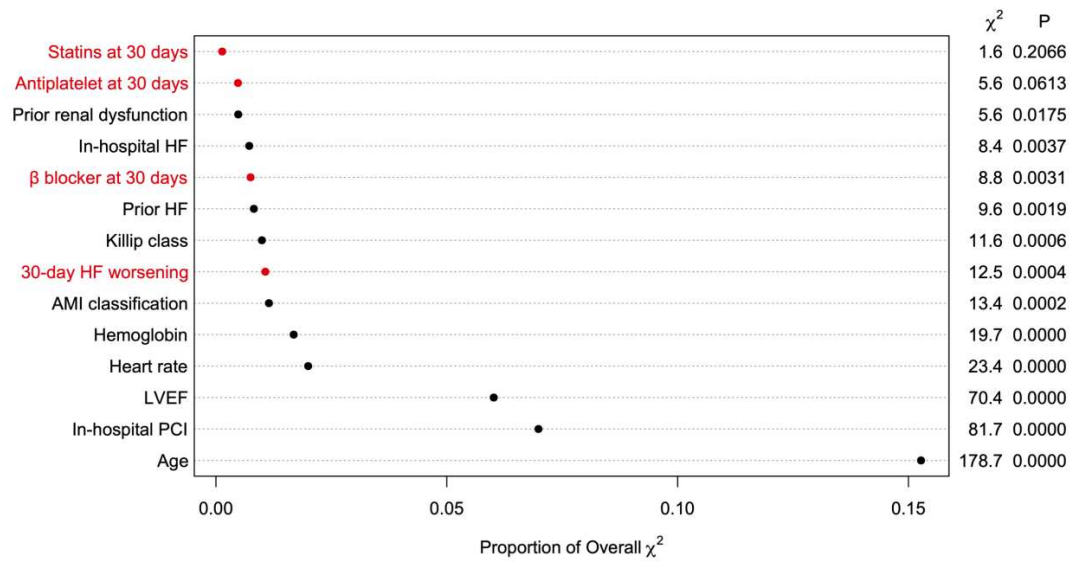

**Supplemental Figure 20. Comparisons of clinical utility between models with or without adverse events and medications**

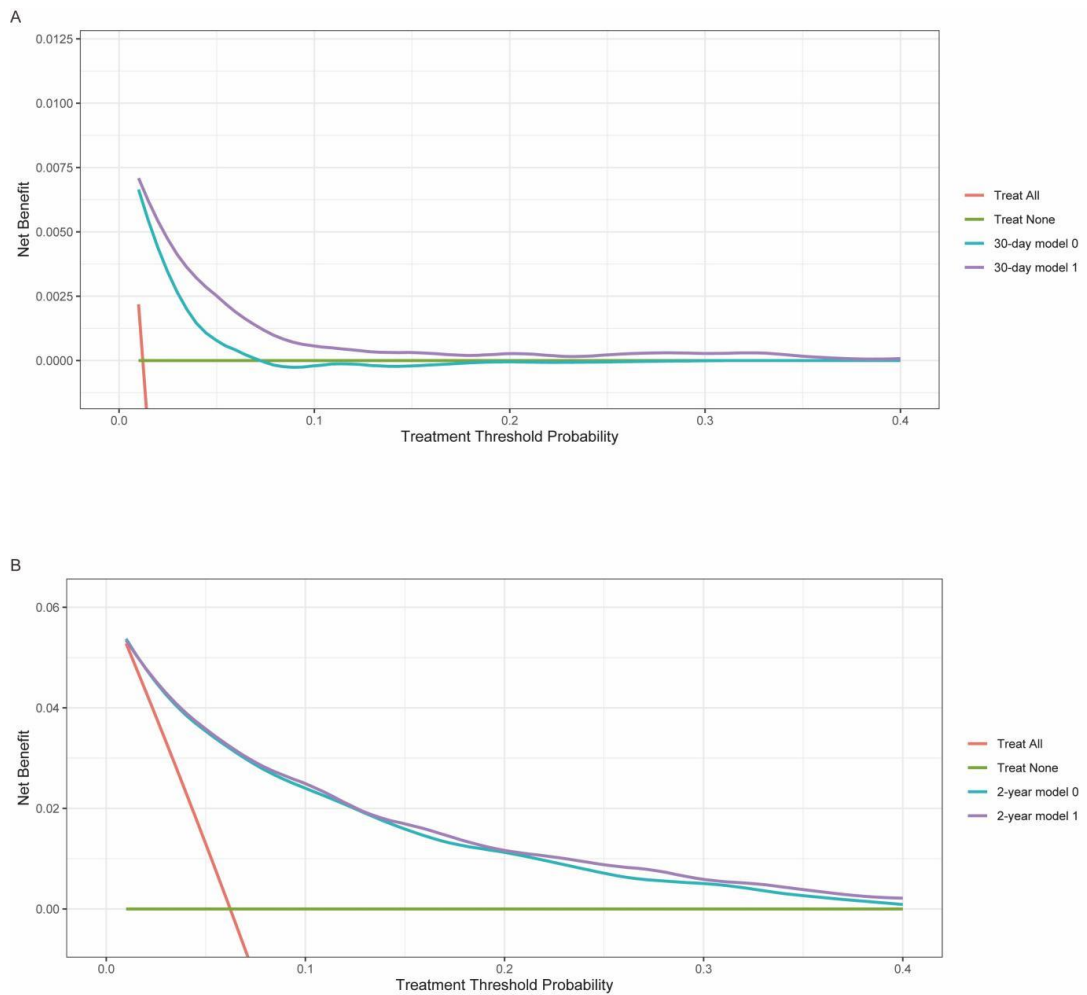



### Supplemental Figure 21. Comparisons of clinical utility between models with or without hospital level

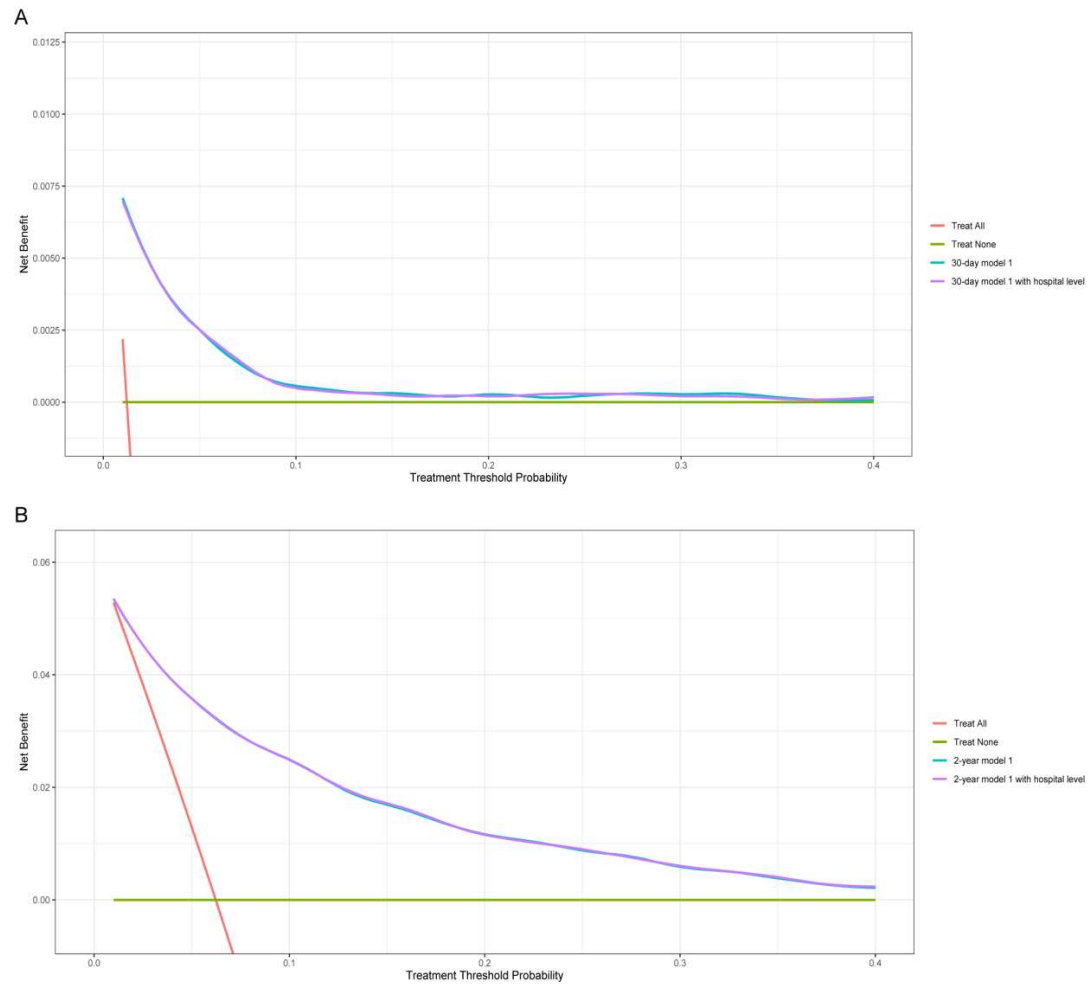

**Supplemental Figure 22. Comparisons of clinical utility between models and GRACE 1.0 score**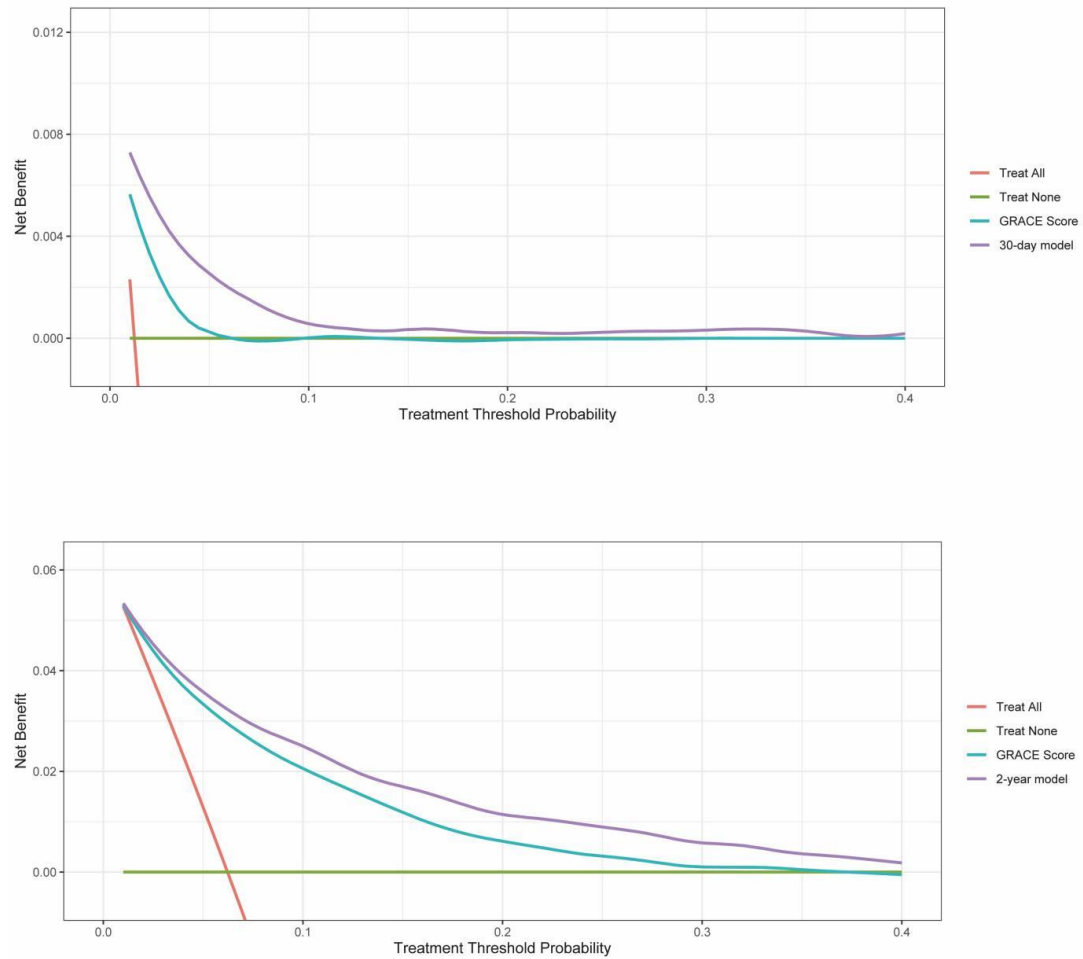

**Supplemental Figure 23. Comparisons of clinical utility between models and GRACE 2.0 score**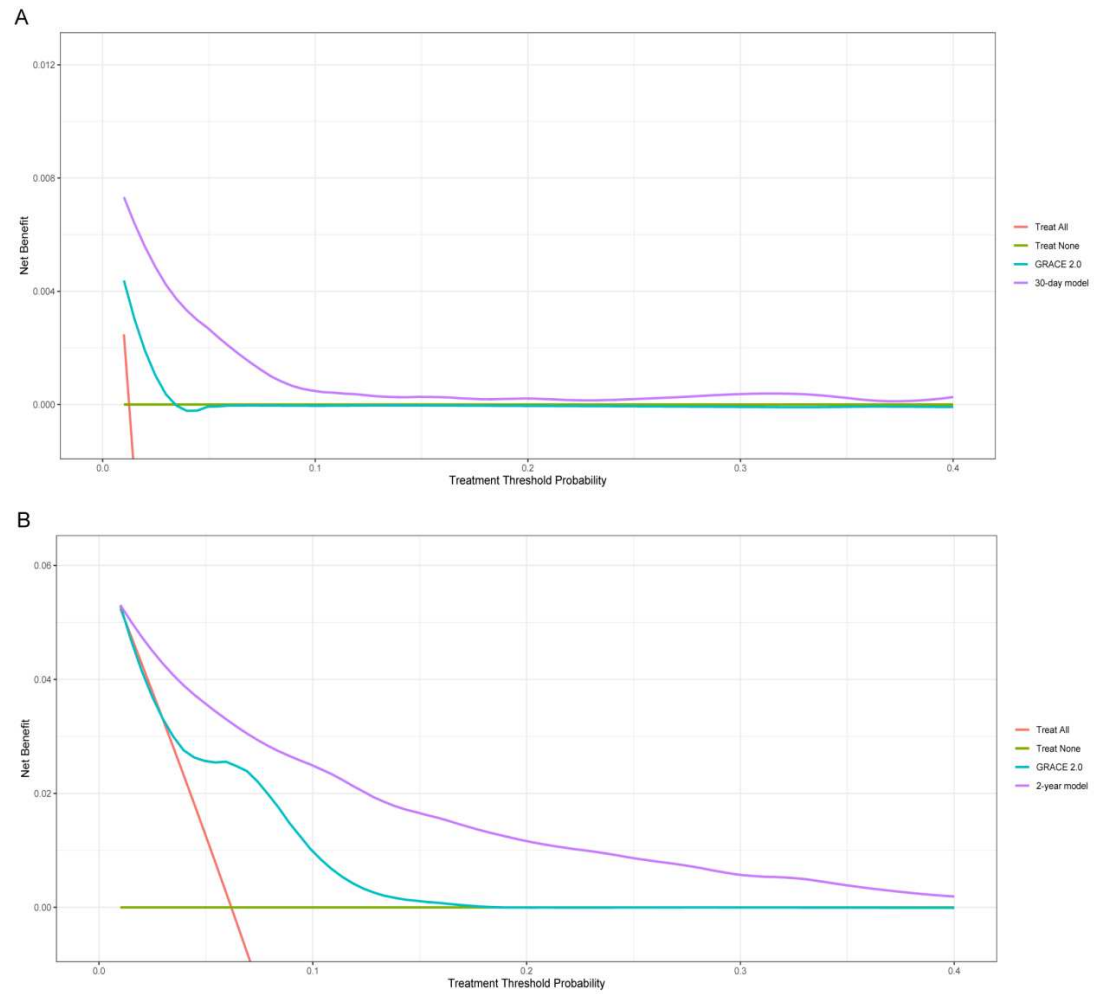

**Supplemental Figure 24. Calibration curves of 30-day prognostic nomogram**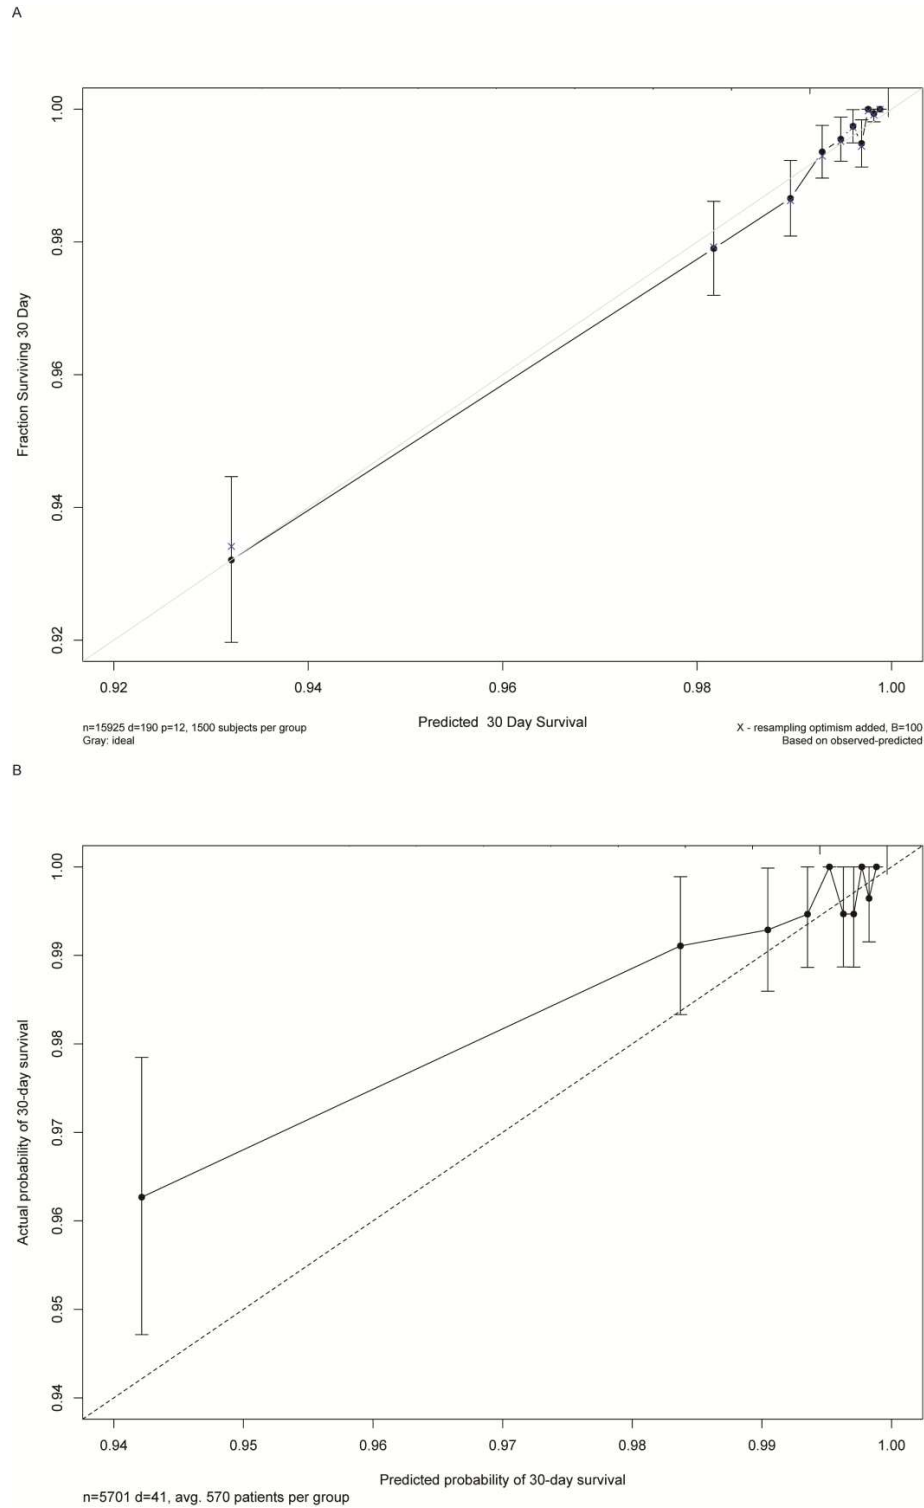

**Supplemental Figure 25. Calibration curves of 2-year prognostic nomogram**

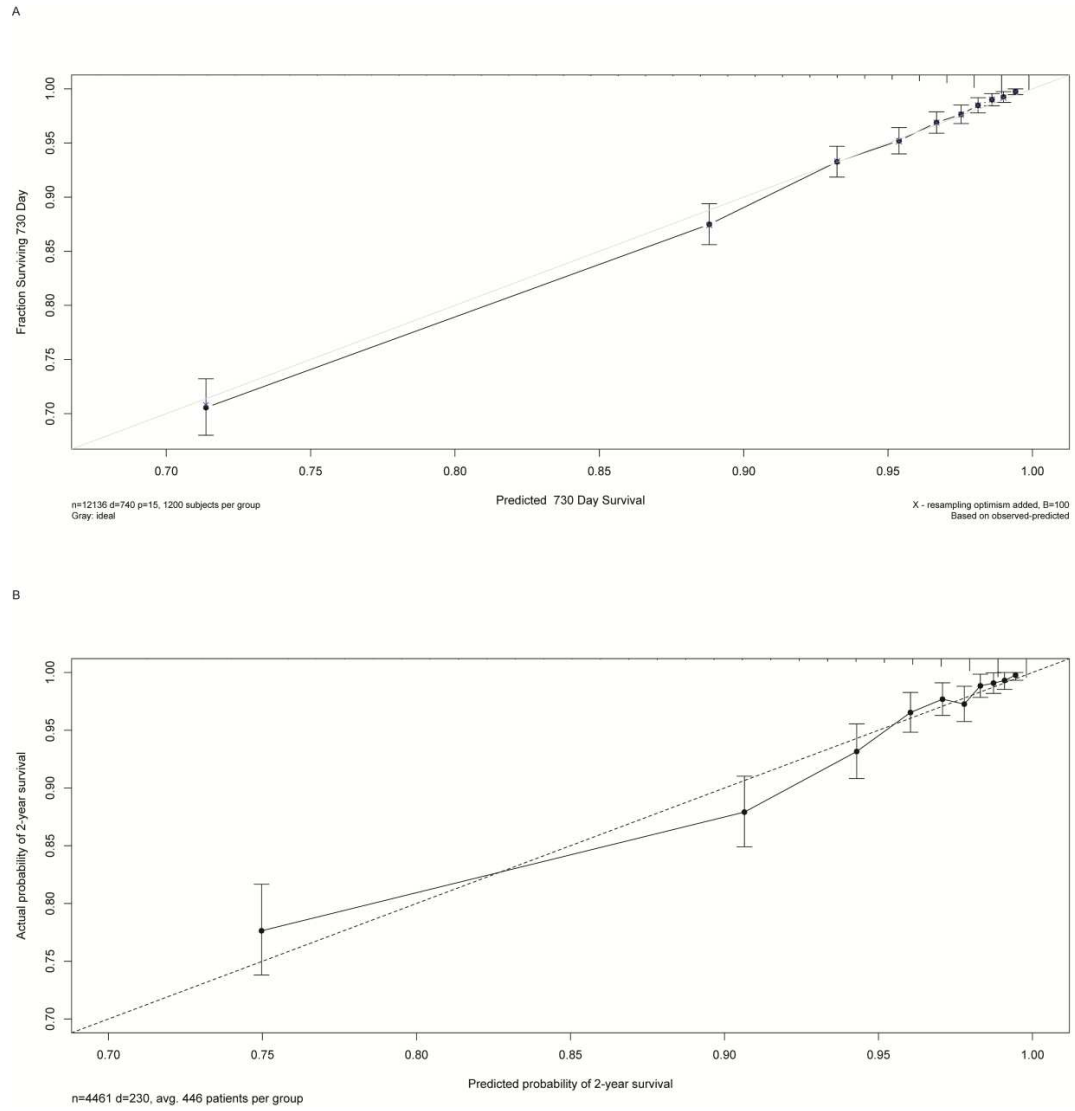

Supplement: bmjopen-2022-069505supp001.pdf [file bmjopen-2022-069505supp001.pdf]
