# Supplementary material for: Development and validation of dynamic models to predict postdischarge mortality risk in patients with acute myocardial infarction: results from China Acute Myocardial Infarction Registry
Source: PubMed Central journal article supplement — BMJ Open. 2023 Mar 28;13(3):e069505. doi: 10.1136/bmjopen-2022-069505 (PMC10069604; doi:10.1136/bmjopen-2022-069505), 2023-03-28
Supplement: bmjopen-2022-069505.draft_revisions.pdf [file bmjopen-2022-069505.draft_revisions.pdf]

# BMJ Open

BMJ Open is committed to open peer review. As part of this commitment we make the peer review history of every article we publish publicly available.

When an article is published we post the peer reviewers' comments and the authors' responses online. We also post the versions of the paper that were used during peer review. These are the versions that the peer review comments apply to.

The versions of the paper that follow are the versions that were submitted during the peer review process. They are not the versions of record or the final published versions. They should not be cited or distributed as the published version of this manuscript.

BMJ Open is an open access journal and the full, final, typeset and author-corrected version of record of the manuscript is available on our site with no access controls, subscription charges or pay-per-view fees (<http://bmjopen.bmj.com>).

If you have any questions on BMJ Open's open peer review process please email [info.bmjopen@bmj.com](mailto:info.bmjopen@bmj.com)

# BMJ Open

## Dynamic risk prediction in patients following acute myocardial infarction

|                               |                                                                                                                                                                                                                                                                                                                                                                                                                                                                                                                                                                                                                                                                                                                                                                                                                                                                                                                                                                                                                                                                                                                                                                                                                                                                                                                                                                                                                                                                                                                                                                                                                                                                                                                                                                                                                                                                                                                                                                                                                                                                                                                                                  |
|-------------------------------|--------------------------------------------------------------------------------------------------------------------------------------------------------------------------------------------------------------------------------------------------------------------------------------------------------------------------------------------------------------------------------------------------------------------------------------------------------------------------------------------------------------------------------------------------------------------------------------------------------------------------------------------------------------------------------------------------------------------------------------------------------------------------------------------------------------------------------------------------------------------------------------------------------------------------------------------------------------------------------------------------------------------------------------------------------------------------------------------------------------------------------------------------------------------------------------------------------------------------------------------------------------------------------------------------------------------------------------------------------------------------------------------------------------------------------------------------------------------------------------------------------------------------------------------------------------------------------------------------------------------------------------------------------------------------------------------------------------------------------------------------------------------------------------------------------------------------------------------------------------------------------------------------------------------------------------------------------------------------------------------------------------------------------------------------------------------------------------------------------------------------------------------------|
| Journal:                      | <i>BMJ Open</i>                                                                                                                                                                                                                                                                                                                                                                                                                                                                                                                                                                                                                                                                                                                                                                                                                                                                                                                                                                                                                                                                                                                                                                                                                                                                                                                                                                                                                                                                                                                                                                                                                                                                                                                                                                                                                                                                                                                                                                                                                                                                                                                                  |
| Manuscript ID                 | bmjopen-2022-069505                                                                                                                                                                                                                                                                                                                                                                                                                                                                                                                                                                                                                                                                                                                                                                                                                                                                                                                                                                                                                                                                                                                                                                                                                                                                                                                                                                                                                                                                                                                                                                                                                                                                                                                                                                                                                                                                                                                                                                                                                                                                                                                              |
| Article Type:                 | Original research                                                                                                                                                                                                                                                                                                                                                                                                                                                                                                                                                                                                                                                                                                                                                                                                                                                                                                                                                                                                                                                                                                                                                                                                                                                                                                                                                                                                                                                                                                                                                                                                                                                                                                                                                                                                                                                                                                                                                                                                                                                                                                                                |
| Date Submitted by the Author: | 23-Oct-2022                                                                                                                                                                                                                                                                                                                                                                                                                                                                                                                                                                                                                                                                                                                                                                                                                                                                                                                                                                                                                                                                                                                                                                                                                                                                                                                                                                                                                                                                                                                                                                                                                                                                                                                                                                                                                                                                                                                                                                                                                                                                                                                                      |
| Complete List of Authors:     | <p>Lv, Junxing; Chinese Academy of Medical Sciences &amp; Peking Union Medical College Fuwai Hospital, Cardiology</p> <p>Wang, Chuang-Shi; Chinese Academy of Medical Sciences &amp; Peking Union Medical College Fuwai Hospital, Medical Research and Biometrics Center, National Center for Cardiovascular Diseases, Fuwai Hospital, Chinese Academy of Medical Sciences and Peking Union Medical College, Beijing 102300, China.</p> <p>Gao, Xiaojin; Fu Wai Hospital, National Center for Cardiovascular Diseases, Chinese Academy of Medical Sciences and Peking Union Medical College, Cardiology</p> <p>Yang, Jingang; Chinese Academy of Medical Sciences &amp; Peking Union Medical College Fuwai Hospital, Cardiology</p> <p>Zhang, Xuan; State Key Laboratory of Cardiovascular Disease, Fuwai Hospital, National Center for Cardiovascular Diseases, Chinese Academy of Medical Sciences and Peking Union Medical College, Beijing, China, Department of Cardiology</p> <p>Ye, Yunqing; Chinese Academy of Medical Sciences &amp; Peking Union Medical College Fuwai Hospital, Department of Cardiology</p> <p>Dong, Qiuting; Chinese Academy of Medical Sciences &amp; Peking Union Medical College Fuwai Hospital, Department of Cardiology</p> <p>Fu, Rui; Chinese Academy of Medical Sciences and Peking Union Medical College Fuwai Hospital, Cardiology</p> <p>sun, hui; Chinese Academy of Medical Sciences &amp; Peking Union Medical College Fuwai Hospital, Cardiology</p> <p>Yan, Xinxin; Chinese Academy of Medical Sciences &amp; Peking Union Medical College Fuwai Hospital, Department of Cardiology</p> <p>Zhao, Yanyan; Chinese Academy of Medical Sciences &amp; Peking Union Medical College Fuwai Hospital, Medical Research &amp; Biometrics Center</p> <p>Yang, Wang; Chinese Academy of Medical Sciences &amp; Peking Union Medical College Fuwai Hospital</p> <p>Xu, Haiyan; Chinese Academy of Medical Sciences &amp; Peking Union Medical College Fuwai Hospital, Department of Cardiology</p> <p>Yang, Yuejin; Chinese Academy of Medical Sciences &amp; Peking Union Medical College Fuwai Hospital</p> |
| Keywords:                     | Myocardial infarction < CARDIOLOGY, Coronary heart disease < CARDIOLOGY, Coronary intervention < CARDIOLOGY                                                                                                                                                                                                                                                                                                                                                                                                                                                                                                                                                                                                                                                                                                                                                                                                                                                                                                                                                                                                                                                                                                                                                                                                                                                                                                                                                                                                                                                                                                                                                                                                                                                                                                                                                                                                                                                                                                                                                                                                                                      |
|                               |                                                                                                                                                                                                                                                                                                                                                                                                                                                                                                                                                                                                                                                                                                                                                                                                                                                                                                                                                                                                                                                                                                                                                                                                                                                                                                                                                                                                                                                                                                                                                                                                                                                                                                                                                                                                                                                                                                                                                                                                                                                                                                                                                  |

1  
2  
3  
4  
5  
6  
7  
8  
9  
10  
11  
12  
13  
14  
15  
16  
17  
18  
19  
20  
21  
22  
23  
24  
25  
26  
27  
28  
29  
30  
31  
32  
33  
34  
35  
36  
37  
38  
39  
40  
41  
42  
43  
44  
45  
46  
47  
48  
49  
50  
51  
52  
53  
54  
55  
56  
57  
58  
59  
60

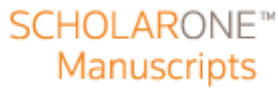

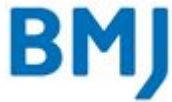

I, the Submitting Author has the right to grant and does grant on behalf of all authors of the Work (as defined in the below author licence), an exclusive licence and/or a non-exclusive licence for contributions from authors who are: i) UK Crown employees; ii) where BMJ has agreed a CC-BY licence shall apply, and/or iii) in accordance with the terms applicable for US Federal Government officers or employees acting as part of their official duties; on a worldwide, perpetual, irrevocable, royalty-free basis to BMJ Publishing Group Ltd ("BMJ") its licensees and where the relevant Journal is co-owned by BMJ to the co-owners of the Journal, to publish the Work in this journal and any other BMJ products and to exploit all rights, as set out in our [licence](#).

The Submitting Author accepts and understands that any supply made under these terms is made by BMJ to the Submitting Author unless you are acting as an employee on behalf of your employer or a postgraduate student of an affiliated institution which is paying any applicable article publishing charge ("APC") for Open Access articles. Where the Submitting Author wishes to make the Work available on an Open Access basis (and intends to pay the relevant APC), the terms of reuse of such Open Access shall be governed by a Creative Commons licence – details of these licences and which [Creative Commons](#) licence will apply to this Work are set out in our licence referred to above.

Other than as permitted in any relevant BMJ Author's Self Archiving Policies, I confirm this Work has not been accepted for publication elsewhere, is not being considered for publication elsewhere and does not duplicate material already published. I confirm all authors consent to publication of this Work and authorise the granting of this licence.

# Dynamic risk prediction in patients following acute myocardial infarction

**Running title:** Dynamic risk prediction after AMI

Junxing Lv, MD<sup>1,\*</sup>, Chuangshi Wang, PhD<sup>2,\*</sup>, Xiaojin Gao, MD, PhD<sup>1</sup>, Jingang Yang, MD, PhD<sup>1</sup>, Xuan Zhang, MD<sup>1</sup>, Yunqing Ye, MD<sup>1</sup>, Qiuting Dong, MD, PhD<sup>1</sup>, Rui Fu, MD<sup>1</sup>, Hui Sun, MD<sup>1</sup>, Xinxin Yan, MD, PhD<sup>1</sup>, Yanyan Zhao, PhD<sup>2</sup>, Yang Wang, PhD<sup>2</sup>, Haiyan Xu, MD, PhD<sup>1,†</sup>, and Yuejin Yang, MD, PhD<sup>1,†</sup>; on behalf of the China Acute Myocardial Infarction Registry study group

<sup>1</sup> Department of Cardiology, Fuwai Hospital, National Center for Cardiovascular Diseases, Chinese Academy of Medical Sciences and Peking Union Medical College, Beijing, China

<sup>2</sup> Medical Research & Biometrics Center, Fuwai Hospital, National Center for Cardiovascular Diseases, Chinese Academy of Medical Sciences and Peking Union Medical College, Beijing, China

\* Junxing Lv and Chuangshi Wang contributed equally to this work as joint first authors.

† Haiyan Xu and Yuejin Yang contributed equally to this work as joint corresponding authors.

## Correspondence:

Haiyan Xu

Address: No. 167 Beilishi Road, Xicheng District, 100037, Beijing, China.

1  
2  
3 1 Tel: +86-10-88396082 Fax: +86-10-88396237  
4

5  
6 2 E-mail: xuhaiyan@fuwaihospital.org  
7

8  
9 3 Yuejin Yang  
10

11  
12 4 Address: No. 167 Beilishi Road, Xicheng District, 100037, Beijing, China.  
13

14  
15 5 E-mail: yangyjfw@126.com  
16

17  
18 6  
19

20  
21 7 **Word count**  
22

23  
24 8 **Abstract: 296 Main text (not including references, tables, and figure legends): 3246**  
25

26  
27 9  
28

29  
30 10  
31

32  
33 11  
34

## Abstract

**Objectives:** The risk of adverse events and prognostic factors are changing in different time phases after acute myocardial infarction (AMI). The incidence of adverse events is considerable in the early period after AMI hospitalization. Therefore, dynamic risk prediction is needed to guide post-discharge management of AMI. This study aimed to develop an dynamic prognostic instrument for patients following AMI.

**Design:** Prospective cohort.

**Setting:** 108 hospitals in China.

**Participants:** A total of 23887 patients after AMI in the China Acute Myocardial Infarction registry were included in this analysis.

**Primary outcome measures:** All-cause mortality.

**Results:** In multivariable analyses, age, prior stroke, heart rate, Killip class, left ventricular ejection fraction (LVEF), in-hospital percutaneous coronary intervention (PCI), recurrent myocardial ischemia, recurrent myocardial infarction, heart failure (HF) during hospitalization, antiplatelet therapy, and statins at discharge were independently associated with 30-day mortality. Variables related to mortality between 30 days and 2 years included age, prior renal dysfunction, history of HF, AMI classification, heart rate, Killip class, hemoglobin, LVEF, in-hospital PCI, HF during hospitalization, HF worsening within 30 days after discharge, antiplatelet therapy,  $\beta$  blocker, and statins use within 30 days after discharge. The inclusion of adverse events and medications significantly improved the predictive performance of models without these indexes (likelihood ratio test  $P < 0.0001$ ). These two sets of predictors were used to establish dynamic prognostic nomograms for predicting survival in patients with AMI. The C indexes of 30-day and 2-year prognostic nomograms were 0.85 (95% confidence interval [CI]: 0.83-0.88) and 0.83 (95% CI: 0.81-0.84) in derivation cohort,

1  
2  
3 1 and 0.79 (95% CI: 0.71-0.86) and 0.81 (95% CI: 0.79-0.84) in validation cohort, with  
4  
5 2 satisfying calibration.  
6  
7

8 3 **Conclusions:** We established dynamic prognostic models incorporating adverse event and  
9  
10 4 medications. The nomograms may be useful instruments to help prospective risk assessment  
11  
12  
13 5 and management of AMI.  
14  
15

16 6 **Trial registration number:** NCT01874691.  
17  
18  
19 7

20  
21  
22 8 **Keywords:** Myocardial infarction, risk prediction, model, prognosis  
23  
24  
25  
26  
27  
28  
29  
30  
31  
32  
33  
34  
35  
36  
37  
38  
39  
40  
41  
42  
43  
44  
45  
46  
47  
48  
49  
50  
51  
52  
53  
54  
55  
56  
57  
58  
59  
60



## Strengths and limitations of this study

- We developed and validated dynamic prognostic nomograms, which might help prospective risk evaluation and management of patients after acute myocardial infarction (AMI) hospitalization.
- The study demonstrated that both in-hospital and post-discharge adverse events as well as medications were independently associated with mortality, and provided incremental prognostic value over traditional predictors.
- The predictive performance of dynamic prognostic nomograms would be further improved if included more follow-up variables.
- The dynamic prognostic models should be further validated in independent cohorts.

## 1           2 3           1    **Introduction** 4 5

6           2    Although in-hospital mortality of acute myocardial infarction (AMI) has been decreased in  
7  
8           3    many countries,<sup>1,2</sup> risk of adverse events remains considerable in survivors after AMI  
9  
10          4    hospitalization.<sup>3</sup> Previous studies have indicated unsatisfying and imbalanced quality of  
11  
12          5    secondary prevention medications in clinical practice,<sup>4,5</sup> which could cause negative impact  
13  
14          6    on prognosis of AMI patients. Individualized risk assessment may aid in decision making of  
15  
16          7    long-term therapeutic strategies for patients after AMI. However, the existing risk prediction  
17  
18          8    tools, which are mainly based on data collected at admission, fail to consider the changing  
19  
20          9    nature of adverse events and medications after AMI hospitalization,<sup>6,7</sup> and therefore may not  
21  
22          10   be appropriate to guide long-term management. Dynamic risk assessment may help improve  
23  
24          11   the quality of long-term management for patients following AMI.  
25  
26  
27  
28  
29

30          12            Although several studies sought to forecast mortality dynamically in patients with acute  
31  
32          13    coronary syndromes,<sup>8-11</sup> prognostic components of these models were obtained during  
33  
34          14    hospitalization, without taking follow-up adverse events and medications into consideration.  
35  
36          15    Dynamic prognostic instruments designed to help risk reassessment should include  
37  
38          16    post-discharge information which is associated with outcomes. In this study, we aimed to  
39  
40          17    establish and validate dynamic risk prediction models, visualized by nomograms, which  
41  
42          18    included in-hospital and post-discharge adverse events and medications, to assist in  
43  
44          19    prognostic evaluation and decision-making of secondary prevention strategies in patients  
45  
46          20    following AMI.  
47  
48  
49  
50

## 51          21 52 53 54          22    **Methods** 55 56

### 57          23    *Study population* 58 59 60

1  
2  
3 1 The data for the present study were from the China Acute Myocardial Infarction (CAMI)  
4  
5 2 registry. The design of the CAMI registry has been described and published elsewhere.<sup>12</sup>  
6  
7  
8 3 Briefly, 108 hospitals from 31 provinces and municipalities throughout Mainland China were  
9  
10 4 included in this prospective, nationwide, multicenter registry. Consecutive patients with AMI  
11  
12 5 were enrolled in the registry and the final diagnosis of patients must meet the third Universal  
13  
14 6 Definition for Myocardial Infarction (2012).<sup>13</sup> All types of AMI were eligible for the CAMI  
15  
16 7 registry, except type 4a and type 5. Presenting characteristics, medical history, laboratory  
17  
18 8 results, medications, and clinical outcomes were collected according to the ACC/AHA Task  
19  
20 9 Force on clinical data standards and NCDR-ACTION-GWTG element dictionary.  
21  
22  
23

24 10 Patients registered in the CAMI registry from January 2013 to September 2014 were  
25  
26 11 included in this study. Those with invalid diagnosis (n=1312), who were transferred out  
27  
28 12 (n=1181) or died during hospitalization (n=1690) were excluded. The remaining population  
29  
30 13 (n=23887) was divided randomly according to 2:1 ratio into derivation (n=15925) and  
31  
32 14 validation (n=7962) cohorts for developing and validating a 30-day risk prediction model.  
33  
34 15 After further excluding patients who died within 30 days after discharge (n=293) and those  
35  
36 16 with missing data on 30-day medication use (n=5391), the remaining derivation (n=12136)  
37  
38 17 and validation (n=6067) cohorts were used for establishing and testing a 2-year risk prediction  
39  
40 18 model (online supplemental figure 1).  
41  
42  
43  
44  
45  
46  
47  
48

## 49 20 ***Definitions***

50  
51 21 Standard definitions of adverse events have been described elsewhere in detail.<sup>14</sup> Taking a  
52  
53 22 medication within 30 days means using the medication during this period after discharge  
54  
55 23 without discontinuation.  
56  
57  
58  
59  
60

### ***Follow-up and endpoints***

Patients were followed by clinical visits or telephone call at 30 days, 6 months, 12 months, 18 months, and 24 months. Adverse events (such as death, recurrent myocardial infarction, and heart failure worsening) and medications at follow-up time points were collected by trained cardiologists or cardiovascular fellows. The primary endpoints of this analysis were all-cause mortality within 30 days after AMI hospitalization (for establishing 30-day risk prediction model) and mortality between 30 days and 2 years (for establishing 2-year risk prediction model).

### ***Statistical analysis***

Categorical variables were summarized as frequencies and percentages, and compared by chi-square or Fisher exact test, as appropriate. Continuous variables were expressed as mean  $\pm$  standard deviation or medians (interquartile range) according to data distributions, and compared by student t or nonparametric test. Kaplan-Meier curve and density plots were used to depict the changing nature of risk after AMI hospitalization.

The derivation cohort was used to screen predictors of 30-day mortality and mortality between 30 days and 2 years. The associations between variables, including age, sex, body mass index (BMI), diabetes, hypertension, hyperlipidemia, smoking, prior angina pectoris, prior myocardial infarction, prior heart failure, prior stroke, prior peripheral artery disease, prior percutaneous coronary intervention (PCI), prior coronary artery bypass graft (CABG), prior renal dysfunction, chronic obstructive pulmonary disease, symptom onset to admission time, heart rate, systolic blood pressure, Killip class, cardiac arrest at admission, diagnosis, anterior wall involvement, creatinine clearance, hemoglobin, leukocyte count, left ventricular ejection fraction (LVEF), in-hospital PCI, in-hospital CABG, heart failure, recurrent

1  
2  
3 1 myocardial ischemia, recurrent myocardial infarction, stroke, other bleeding events (bleeding  
4  
5 2 events not including cerebral hemorrhage) during hospitalization, antiplatelet therapy at  
6  
7  
8 3 discharge, statins at discharge,  $\beta$  blockers at discharge, and angiotensin converting enzyme  
9  
10 4 inhibitor (ACEI) or angiotensin II receptor blocker (ARB) at discharge, and 30-day mortality  
11  
12 5 were first assessed in univariable Cox regression models. For obtaining prognostic factors of  
13  
14 6 mortality between 30 days and 2 years, the associations of adverse events within 30 days  
15  
16 7 (recurrent myocardial infarction and heart failure worsening) and 30-day medications  
17  
18 8 (antiplatelet therapy, statins,  $\beta$  blockers, and ACEI/ARB) with mortality were also assessed in  
19  
20 9 univariable Cox models besides variables mentioned previously. Subsequently, the least  
21  
22 10 absolute shrinkage and selection operator (LASSO) method was adopted to select predictors  
23  
24 11 of short-term and long-term mortality respectively from variables with  $P \leq 0.1$  in univariable  
25  
26 12 analysis. The selected predictors were used to establish dynamic risk prediction models by  
27  
28 13 multivariable Cox regression model. The relative importance of these variables was ranked  
29  
30 14 according to the proportion of explainable log-likelihood ratio  $\chi^2$  statistics.

31  
32  
33  
34  
35  
36 15 To analyze the incremental prognostic value of adverse events and medications over  
37  
38 16 traditional predictive indexes, we compared the predictive performance between models with  
39  
40 17 or without adverse events and medications using C index, net reclassification index (NRI),  
41  
42 18 integrated discrimination improvement index (IDI), likelihood ratio test, and Bayesian  
43  
44 19 information criteria (BIC). The clinical utilities of models were compared by decision curve  
45  
46 20 analysis. Predictive performance was also compared between 30-day risk model or 2-year risk  
47  
48 21 model and the Global Registry of Acute Coronary Events (GRACE) risk score to further  
49  
50 22 analyze the additional value of the dynamic models beyond existing prognostic tool.

51  
52  
53  
54  
55 23 Two prognostic nomograms, which could make complex predictive formulas friendly to  
56  
57 24 use in clinical practice, were constructed based on the regression coefficients of predictors for  
58  
59 25 mortality using the “rms” package of R software. Discrimination and calibration of the

1  
2  
3 1 nomograms were assessed by C index and calibration curves presenting the relationship  
4  
5 2 between observed and predicted survival probabilities in both derivation and validation  
6  
7 3 cohorts. Predictive performance of models was also evaluated in subgroups of patients  
8  
9 4 according to age, sex, diabetes, AMI classification, and in-hospital PCI.

10  
11  
12  
13 5 Before multivariable analysis, we calculated variance inflation factor to examine  
14  
15 6 multicollinearity issue. Multiple imputation was used to generate 5 datasets without missing  
16  
17 7 values. The LASSO method was performed in each dataset. Only variables selected by  
18  
19 8 LASSO method in all 5 datasets were included in final dynamic prognostic models. Results of  
20  
21 9 Cox regression models were reported as hazard ratios (HR) with 95% confidence intervals  
22  
23 10 (CI). A two-tailed  $P < 0.05$  was considered statistically significant. Statistical analyses were  
24  
25 11 performed using R version 4.0.5 (R Foundation for Statistical Computing, Vienna, Austria)  
26  
27 12 and SAS version 9.4 (SAS Institute Inc., Cary, NC, USA).

### 31 32 13 33 34 35 14 ***Patient and public involvement***

36  
37  
38 15 Patients or the public were not involved directly in the design, conduct, reporting or  
39  
40 16 dissemination plans of our research.

### 41 42 43 17 44 45 46 18 **Results**

47  
48  
49 19 Baseline characteristics, medications, and outcomes of derivation and validation cohorts were  
50  
51 20 summarized in table 1 and online supplemental table 1. Variables were comparable between  
52  
53 21 derivation and validation cohorts except  $\beta$  blockers at discharge. Rates of 30-day mortality  
54  
55 22 among hospital survivors in derivation and validation cohorts were 1.2% (190/15925 patients)  
56  
57 23 and 1.3% (103/7962 patients), respectively. Rates of mortality between 30 days and 2 years  
58  
59  
60

1  
2  
3 1 were 6.1% (740/12136 patients) and 5.7% (345/6067 patients). The Kaplan-Meier curve and  
4  
5 2 density plots showed the changing risk of death and recurrent myocardial infarction within 2  
6  
7 3 years after AMI hospitalization (online supplemental figure 2 and 3).  
8  
9

#### 10 4 11 12 13 14 5 ***Predictors of 30-day mortality in patients after AMI***

15  
16 6 Univariable analysis of the associations between variables and 30-day mortality was presented  
17  
18 7 in online supplemental table 2. In the LASSO-based Cox regression model, age, prior stroke,  
19  
20 8 heart rate, Killip class, LVEF, in-hospital PCI, in-hospital recurrent myocardial ischemia,  
21  
22 9 in-hospital recurrent myocardial infarction, in-hospital heart failure, antiplatelet therapy, and  
23  
24 10 statins at discharge were independently associated with 30-day mortality (online supplemental  
25  
26 11 figure 4 to 8; table 2). The relative importance of these predictors was ranked and shown in  
27  
28 12 online supplemental figure 9.  
29  
30  
31  
32  
33  
34  
35

#### 36 14 ***Predictors of 2-year mortality for 30-day survivors after AMI hospitalization***

37  
38  
39 15 Univariable analysis of mortality between 30 days and 2 years after AMI hospitalization was  
40  
41 16 shown in online supplemental table 3. In the LASSO-based Cox regression model, age, prior  
42  
43 17 renal dysfunction, history of heart failure, AMI classification, heart rate, Killip class,  
44  
45 18 hemoglobin, LVEF, in-hospital PCI, in-hospital heart failure, heart failure worsening within  
46  
47 19 30 days, antiplatelet therapy,  $\beta$  blocker, and statins within 30 days were identified as  
48  
49 20 predictors of mortality (online supplemental figure 10 to 14; table 3). The relative importance  
50  
51 21 of these predictors was ranked and presented in online supplemental figure 15.  
52  
53  
54  
55  
56  
57  
58

#### 59 23 ***Incremental prognostic value of adverse events and medications***

60

1  
2  
3 1 The inclusion of in-hospital recurrent myocardial ischemia, in-hospital recurrent myocardial  
4  
5 2 infarction, in-hospital heart failure, antiplatelet therapy, and statins at discharge significantly  
6  
7  
8 3 improved the predictive power of 30-day risk prediction model (table 4; 30-day model 1 vs  
9  
10 4 30-day model 0, C index, 0.855 [0.830-0.879] vs 0.822 [0.796-0.848]; NRI [95%CI], 0.445  
11  
12 5 [0.339-0.523], P<0.0001; IDI [95%CI], 0.040 [0.025-0.074], P<0.0001; likelihood ratio test  
13  
14 6 P<0.0001; BIC, 3434.091 vs 3350.882). In the 2-year risk prediction model, heart failure  
15  
16 7 worsening within 30 days, antiplatelet,  $\beta$  blocker, and statins within 30 days also provided  
17  
18 8 additional prognostic value over predictive indexes obtained during hospitalization (table 5).  
19  
20 9 The decision curve analysis further demonstrated better clinical utilities after adding adverse  
21  
22 10 events and medications into 30-day and 2-year risk models (online supplemental figure 16).  
23  
24  
25  
26  
27 11  
28  
29

### 30 12 ***Comparisons of prognostic models and GRACE risk score***

31  
32  
33 13 For predicting 30-day mortality, the 30-day risk prediction model showed significantly better  
34  
35 14 predictive performance than the GRACE risk score (30-day risk model vs GRACE score, C  
36  
37 15 index, 0.855 [0.830-0.879] vs 0.771 [0.740-0.802]; NRI [95%CI], 0.412 [0.307-0.485],  
38  
39 16 P<0.0001; IDI [95%CI], 0.048 [0.032-0.090], P<0.0001; BIC, 3267.271 vs 3402.578).  
40  
41 17 Similarly, when predicting 2-year mortality, the 2-year risk prediction model also performed  
42  
43 18 better than the GRACE risk score (2-year risk model vs GRACE score, C index, 0.825  
44  
45 19 [0.811-0.839] vs 0.798 [0.783-0.813]; NRI [95%CI], 0.191 [0.147-0.257], P<0.0001; IDI  
46  
47 20 [95%CI], 0.041 [0.031-0.057], P<0.0001; BIC, 12540.559 vs 12697.527). The decision curve  
48  
49 21 analysis further demonstrated better clinical utilities of both 30-day and 2-year risk models  
50  
51 22 than CRACE score (online supplemental figure 17).  
52  
53  
54  
55  
56 23  
57  
58  
59 24

### 60 24 ***Nomograms for dynamic risk prediction***



1  
2  
3 1 Two nomograms were created by assigning a weighted score based on regression coefficients  
4  
5 2 of each prognostic index for calculating 30-day and 2-year survival probabilities respectively.  
6  
7 3 All observed values of a prognostic index corresponded vertically to points on the top scale.  
8  
9 4 The sum of points for each index was plotted on the “Total points” scale, and corresponded to  
10  
11 5 survival probability at the bottom (figure 1 and 2).  
12  
13  
14

15 6 The 30-day prognostic nomogram achieved high discrimination in both derivation and  
16  
17 7 validation cohorts, with C indexes of 0.85 (95% CI: 0.83-0.88) and 0.79 (95% CI: 0.71-0.86)  
18  
19 8 respectively. The calibration curves presenting the concordance between observed and  
20  
21 9 predicted 30-day survival probability in two cohorts also showed satisfying calibration of the  
22  
23 10 model (online supplemental figure 18). In addition, the 30-day prognostic nomogram  
24  
25 11 achieved moderate to high discrimination (C indexes: 0.74 to 0.83) in subsets according to  
26  
27 12 age, sex, diabetes, AMI classification, and PCI (online supplemental table 4).  
28  
29  
30  
31

32 13 The C indexes of 2-year prognostic nomogram were 0.83 (95% CI: 0.81-0.84) and 0.81  
33  
34 14 (95% CI: 0.79-0.84) in derivation and validation cohorts, respectively. The calibration curves  
35  
36 15 demonstrated excellent calibration of the nomogram in both derivation and validation cohorts  
37  
38 16 (online supplemental figure 19). In aforementioned subgroups of patients, the model  
39  
40 17 discrimination was acceptable (C index: 0.66 to 0.83, online supplemental table 5).  
41  
42  
43  
44  
45  
46

## 47 19 **Discussion**

48  
49  
50 20 Using data from a large, prospective, multicenter registry, we screened eleven predictors of  
51  
52 21 30-day mortality, and fourteen variables, including heart failure worsening and medications  
53  
54 22 within 30 days, related to mortality between 30 days and 2 years in patients after AMI  
55  
56 23 hospitalization. These two sets of predictors were used to develop prognostic nomograms  
57  
58 24 which could predict post-discharge mortality for AMI patients in different time phases. The  
59  
60

1  
2  
3 1 nomograms showed satisfying discrimination and calibration in both derivation and validation  
4  
5 2 cohorts. This is a novel dynamic prognostic tool which can serve for prospective risk  
6  
7 3 assessment and guide long-term management of patients after AMI.  
8  
9

10 4 A series of risk models have been developed to predict mortality in patients with acute  
11  
12 5 coronary syndromes.<sup>6,7,15</sup> These models mainly included prognostic factors obtained at  
13  
14 6 admission, and provided a fixed estimate of survival probability for a given patient. This  
15  
16 7 working mode of prognostic models was helpful for screening high-risk patients and  
17  
18 8 determining therapeutic strategies after admission. However, the incidence of adverse  
19  
20 9 cardiovascular events remained considerable after in-hospital management of AMI.  
21  
22 10 Accumulating evidence has implied that a larger proportion of adverse events occurred in the  
23  
24 11 early phase after AMI hospitalization,<sup>16</sup> which reflected the changing risk following AMI and  
25  
26 12 highlighted the importance of risk reassessment during follow-up. Although some prognostic  
27  
28 13 models, such as the Global Registry of Acute Coronary Events (GRACE) risk score and  
29  
30 14 dynamic Thrombolysis In Myocardial Infarction (TIMI) risk score, could be used to assess  
31  
32 15 survival at discharge,<sup>6,9</sup> none of them could improve survival estimates during follow-up.  
33  
34 16 Considering the higher risk of adverse events in the early period than that at the late stage  
35  
36 17 after AMI hospitalization (online supplemental figure 2 and 3), we chose 30 days, which was  
37  
38 18 also one of routine follow-up points after AMI hospitalization in clinical practice, as the time  
39  
40 19 point of risk reassessment to establish dynamic risk prediction models.  
41  
42  
43  
44  
45  
46  
47

48 20 The first model, which was developed to assess 30-day survival at discharge in patients  
49  
50 21 after AMI, included variables related to patients' demographics, hemodynamics, left  
51  
52 22 ventricular systolic function, treatment, in-hospital adverse events, and medications at  
53  
54 23 discharge. Previous studies have established several prognostic models, such as Platelet  
55  
56 24 glycoprotein IIb/IIIa in Unstable agina: Receptor Suppression Using Integrilin (eptifibatide)  
57  
58 25 Therapy (PURSUIT) and Zwolle risk scores,<sup>17,18</sup> to predict 30-day mortality in patients with  
59  
60

1  
2  
3 1 acute coronary syndromes. However, these models mainly used patient characteristics,  
4  
5 2 clinical presentations at admission as well as angiographic features as prognostic indexes. The  
6  
7  
8 3 present study showed that recurrent myocardial ischemia, recurrent myocardial infarction,  
9  
10 4 heart failure during AMI hospitalization, antiplatelet therapy, and statins use at discharge  
11  
12 5 were independently associated with short-term mortality after discharge, and provided  
13  
14 6 significantly incremental prognostic information over traditional predictive indexes.  
15  
16  
17 7 Therefore, these adverse events and medications were included in the novel 30-day prognostic  
18  
19 8 model, which might assist in decision-making of post-discharge management.

22 9 For the second model assessing 2-year survival in 30-day survivors, we screened new  
23  
24 10 predictors including heart failure worsening within 30 days, antiplatelet therapy,  $\beta$  blocker,  
25  
26 11 and statins use within 30 days after discharge. A prior study showed that mortality rate of  
27  
28 12 patients with an early recurrent myocardial infarction (recurrent myocardial infarction within  
29  
30 13 90 days of discharge) was nearly 50% within 5 years.<sup>19</sup> In the present study, we observed that  
31  
32 14 the recurrent myocardial infarction and heart failure worsening within 30 days after discharge  
33  
34 15 were associated with >3-fold and >4.5-fold increase of 2-year mortality risk respectively in  
35  
36 16 univariable analysis, and heart failure worsening, which was included in 2-year prognostic  
37  
38 17 nomogram, was a statistically significant prognostic index in multivariable analysis. To our  
39  
40 18 best knowledge, this is the first prognostic instrument taking follow-up adverse event after  
41  
42 19 AMI into consideration. In addition, although some studies analyzed the prognostic impact of  
43  
44 20 secondary prevention implementation in patients after AMI,<sup>20,21</sup> follow-up medications have  
45  
46 21 not been considered as predictive indexes in risk models for AMI so far. For some patients,  
47  
48 22 not taking optimal medical care within 30 days after discharge could be explained by poor  
49  
50 23 medication adherence after AMI, which was a problem for both developed and developing  
51  
52 24 countries.<sup>21-23</sup> A study found that about 30% of patients with myocardial infarction who  
53  
54 25 underwent PCI in the United States reported suboptimal adherence to prescribed medications  
55  
56  
57  
58  
59  
60

1  
2  
3 1 in six weeks after hospitalization.<sup>23</sup> Data from the China PEACE Prospective AMI study also  
4  
5 2 showed a similar percentage of AMI patients did not take medications as prescribed in the  
6  
7 3 first month after discharge.<sup>21</sup> Patients with early medication nonadherence not only suffered a  
8  
9 4 higher risk of early adverse events, but might not comply with long-term secondary  
10  
11 5 prevention measures, and therefore had poorer long-term prognosis. Another situation was  
12  
13 6 that patients were not prescribed with some medications by physicians, due to  
14  
15 7 contraindications or high risk of side effects. However, lack of secondary prevention  
16  
17 8 medications after AMI still meant a higher risk of cardiovascular adverse events in these  
18  
19 9 patients. Indeed, our analysis showed that insufficient use of antiplatelet therapy,  $\beta$  blocker,  
20  
21 10 and statins within 30 days after AMI hospitalization had significant negative impact on 2-year  
22  
23 11 survival. The inclusion of follow-up medications and adverse events improved risk prediction  
24  
25 12 of 2-year prognostic model.

26  
27  
28  
29  
30  
31 13 The present study showed that the dynamic prognostic nomograms achieved satisfying  
32  
33 14 discrimination and calibration, and performed well in subgroups of patients according to age,  
34  
35 15 sex, diabetes, AMI classification, and PCI. The clinical usefulness of nomograms was  
36  
37 16 confirmed by decision curve analysis. Prognostic nomograms have been used for risk  
38  
39 17 prediction of cancer and cardiovascular diseases.<sup>24-28</sup> The nomograms in this study could  
40  
41 18 assist in dynamic prognostic evaluation in routine clinical practice. Using the nomogram for  
42  
43 19 prediction of 30-day survival, physicians can identify high-risk patients at discharge. Then,  
44  
45 20 the second nomogram can be used to reassess survival probabilities of 30-day survivors, and  
46  
47 21 may guide decision-making of long-term follow-up intensity and strategies of medical care.  
48  
49  
50  
51  
52  
53  
54

## 55 23 **Limitations**

56  
57  
58  
59  
60

1  
2  
3 1 Several important limitations in this study should be mentioned. First, besides variables  
4  
5 2 during hospitalization, heart failure worsening and medications within 30 days after discharge  
6  
7 3 were included in the model for prediction of 2-year mortality. However, laboratory or  
8  
9 4 echocardiographic indexes, such as biomarkers of inflammation, N-terminal pro-B-type  
10  
11 5 natriuretic peptide, or LVEF, were not obtained during follow-up. These variables may further  
12  
13 6 improve the predictive performance of dynamic models. Second, although the present study  
14  
15 7 showed the feasibility of assessing 2-year prognosis at 30 days after discharge, risk  
16  
17 8 reassessment was a serial process and should be done repeatedly beyond early phase after  
18  
19 9 AMI hospitalization. Finally, our dynamic models were only validated in the CAMI registry.  
20  
21  
22  
23  
24 10 Further tests for generalizability in external cohorts are needed.  
25  
26  
27 11

## 28 29 12 **Conclusions**

30  
31  
32 13 The dynamic risk prediction tool consisted of a short-term prognostic model and a long-term  
33  
34 14 prognostic model for patients following AMI. Taking the changing nature of adverse events  
35  
36 15 and medications into consideration, the models can serve prospective risk stratification and  
37  
38 16 guide post-discharge management of AMI. Dynamic risk prediction may play an important  
39  
40 17 role in therapeutic decision-making and quality improvement of secondary prevention after  
41  
42 18 AMI hospitalization.  
43  
44  
45  
46  
47 19

## 48 49 20 **Acknowledgments**

50  
51  
52 21 We appreciate all staff and investigators for their contributions to the CAMI registry.  
53  
54  
55 22

## 56 57 58 23 **Contributors**

59  
60

1  
2  
3 1 HX and YYang contributed significantly to the conception, design, and conduction of this  
4  
5 2 study. JL and CW wrote the initial manuscript. CW, YZ, and YW provided strong support in  
6  
7 3 statistical analysis. JL, CW, XG, JY, XZ, YYe, QD, RF, HS, XY, YZ, YW, HX, and YYang  
8  
9 4 contributed significantly to revisions of manuscript, analysis, and interpretation of data. All  
10  
11 5 authors contributed substantially to this study and approved its submission.  
12  
13  
14  
15 6

### 17 18 7 **Funding**

19  
20  
21 8 This work was supported by the Twelfth Five-Year Planning Project of the Scientific and  
22  
23 9 Technological Department of China [grant number 2011BAI11B02] and Beijing Nova  
24  
25 10 Program [grant number Z211100002121063].  
26  
27  
28  
29 11

### 30 31 32 12 **Competing Interests**

33  
34  
35 13 None declared.  
36  
37  
38 14

### 39 40 41 15 **Patient consent for publication**

42  
43  
44 16 Not required.  
45  
46  
47 17

### 48 49 50 18 **Ethics approval**

51  
52 19 The CAMI registry conformed to the ethical guidelines of the Declaration of Helsinki, and  
53  
54 20 was approved by the institutional review board central committee at Fuwai Hospital, National  
55  
56 21 Center for Cardiovascular Diseases of China. Written informed consents were given by  
57  
58 22 eligible patients before registration.  
59  
60

1  
2  
3  
4  
5  
6  
7  
8  
9  
10  
11  
12  
13  
14  
15  
16  
17  
18  
19  
20  
21  
22  
23  
24  
25  
26  
27  
28  
29  
30  
31  
32  
33  
34  
35  
36  
37  
38  
39  
40  
41  
42  
43  
44  
45  
46  
47  
48  
49  
50  
51  
52  
53  
54  
55  
56  
57  
58  
59  
60

1  
2  
3  
4  
5  
6  
7  
8  
9

**Data Availability Statement**

Data are available on reasonable request from the corresponding authors.

## References

1. Peterson ED, Shah BR, Parsons L, et al. Trends in quality of care for patients with acute myocardial infarction in the National Registry of Myocardial Infarction from 1990 to 2006. *Am Heart J* 2008;156:1045-55.
2. Yamamoto T, Yoshida N, Takayama M; Tokyo CCU Network. Temporal trends in acute myocardial infarction incidence and mortality between 2006 and 2016 in Tokyo - Report from the Tokyo CCU Network. *Circ J* 2019;83:1405-9.
3. Chaudhry SI, Khan RF, Chen J, et al. National trends in recurrent AMI hospitalizations 1 year after acute myocardial infarction in Medicare beneficiaries: 1999-2010. *J Am Heart Assoc* 2014;3:e001197.
4. Ergatoudes C, Thunström E, Rosengren A, et al. Long-term secondary prevention of acute myocardial infarction (SEPAT) - guidelines adherence and outcome. *BMC Cardiovasc Disord* 2016;16:226.
5. Zhao Q, Xu H, Zhang X, et al. Current status and hospital-level differences in care and outcomes of patients with acute non-ST-segment elevation myocardial infarction in China: insights from China Acute Myocardial Infarction Registry. *Front Cardiovasc Med* 2022;8:800222.
6. Eagle KA, Lim MJ, Dabbous OH, et al. A validated prediction model for all forms of acute coronary syndrome: estimating the risk of 6-month postdischarge death in an international registry. *JAMA* 2004;291:2727-33.
7. Antman EM, Cohen M, Bernink PJ, et al. The TIMI risk score for unstable angina/non-ST elevation MI: A method for prognostication and therapeutic decision making. *JAMA* 2000;284:835-42.



- 1  
2  
3 1 8. Chang WC, Boersma E, Granger CB, et al. Dynamic prognostication in non-ST-elevation  
4  
5 2 acute coronary syndromes: insights from GUSTO-IIb and PURSUIT. *Am Heart J*  
6  
7 3 2004;148:62-71.
- 8  
9  
10 4 9. Amin ST, Morrow DA, Braunwald E, et al. Dynamic TIMI risk score for STEMI. *J Am*  
11  
12 5 *Heart Assoc* 2013;2:e003269.
- 13  
14  
15 6 10. Chang WC, Kaul P, Fu Y, et al. Forecasting mortality: dynamic assessment of risk in  
16  
17 7 ST-segment elevation acute myocardial infarction. *Eur Heart J* 2006;27:419-26.
- 18  
19  
20 8 11. Westerhout CM, Pieper KS, James SK, et al. Dynamic modeling of 90-day mortality in  
21  
22 9 ST-elevation myocardial infarction patients undergoing primary percutaneous coronary  
23  
24 10 intervention. *Am Heart J* 2013;165:354-62.e2.
- 25  
26  
27 11 12. Xu H, Li W, Yang J, et al. Tal Infarction (CAMI) Registry: a national long-term  
28  
29 12 registry-research-education integrated platform for exploring acute myocardial infarction  
30  
31 13 in China. *Am Heart J* 2016;175:193-201.e3.
- 32  
33  
34 14 13. Thygesen K, Alpert JS, Jaffe AS, et al. Third universal definition of myocardial  
35  
36 15 infarction. *Circulation* 2012;126:2020-35.
- 37  
38  
39 16 14. Xu H, Yang Y, Wang C, et al. Association of hospital-level differences in care with  
40  
41 17 outcomes among patients with acute ST-segment elevation myocardial infarction in  
42  
43 18 China. *JAMA Netw Open* 2020;3:e2021677.
- 44  
45  
46 19 15. McNamara RL, Kennedy KF, Cohen DJ, et al. Predicting in-hospital mortality in  
47  
48 20 patients with acute myocardial infarction. *J Am Coll Cardiol* 2016;68:626-35.
- 49  
50  
51 21 16. Song J, Murugiah K, Hu S, et al. Incidence, predictors, and prognostic impact of recurrent  
52  
53 22 acute myocardial infarction in China. *Heart* 2020;107:313-8.
- 54  
55  
56  
57  
58  
59  
60

- 1  
2  
3 1 17. Boersma E, Pieper KS, Steyerberg EW, et al. Predictors of outcome in patients with acute  
4  
5 2 coronary syndromes without persistent ST-segment elevation. Results from an  
6  
7 3 international trial of 9461 patients. The PURSUIT Investigators. *Circulation*  
8  
9 4 2020;101:2557-67.  
10  
11  
12  
13 5 18. De Luca G, Suryapranata H, van 't Hof AW, et al. Prognostic assessment of patients with  
14  
15 6 acute myocardial infarction treated with primary angioplasty: implications for early  
16  
17 7 discharge. *Circulation* 2004;109:2737-43.  
18  
19  
20 8 19. Nair R, Johnson M, Kravitz K, et al. Characteristics and outcomes of early recurrent  
21  
22 9 myocardial infarction after acute myocardial infarction. *J Am Heart Assoc*  
23  
24 10 2021;10:e019270.  
25  
26  
27  
28 11 20. Chow CK, Brieger D, Ryan M, et al. Secondary prevention therapies in acute coronary  
29  
30 12 syndrome and relation to outcomes: observational study. *Heart Asia* 2019;11:e011122.  
31  
32  
33 13 21. Shang P, Liu GG, Zheng X, et al. Association between medication adherence and 1-year  
34  
35 14 major cardiovascular adverse events after acute myocardial infarction in China. *J Am*  
36  
37 15 *Heart Assoc* 2019;8:e011793.  
38  
39  
40  
41 16 22. Rymer J, McCoy LA, Thomas L, et al. Persistence of evidence-based medication use  
42  
43 17 after discharge from academic versus nonacademic hospitals among patients with  
44  
45 18 non-ST-segment elevation myocardial infarction. *Am J Cardiol* 2014;114:1479-84.  
46  
47  
48  
49 19 23. Mathews R, Peterson ED, Honeycutt E, et al. Early medication nonadherence after acute  
50  
51 20 myocardial infarction: insights into actionable opportunities from the Treatment with  
52  
53 21 ADP receptor inhibitors: Longitudinal Assessment of Treatment Patterns and Events  
54  
55 22 after Acute Coronary Syndrome (TRANSLATE-ACS) Study. *Circ Cardiovasc Qual*  
56  
57 23 *Outcomes* 2015;8:347-56.  
58  
59  
60

- 1  
2  
3 1 24. Yan B, Su BB, Bai DS, et al. A practical nomogram and risk stratification system  
4  
5 2 predicting the cancer-specific survival for patients with early hepatocellular carcinoma.  
6  
7 3 *Cancer Med* 2021;10:496-506.  
8  
9  
10 4 25. Liu H, Lv L, Qu Y, et al. Prediction of cancer-specific survival and overall survival in  
11  
12 5 middle-aged and older patients with rectal adenocarcinoma using a nomogram model.  
13  
14 6 *Transl Oncol* 2021;14:100938.  
15  
16  
17  
18 7 26. Ó Hartaigh B, Gransar H, Callister T, et al. Development and validation of a  
19  
20 8 simple-to-use nomogram for predicting 5-, 10-, and 15-year survival in asymptomatic  
21  
22 9 adults undergoing coronary artery calcium scoring. *JACC Cardiovasc Imaging*  
23  
24 10 2018;11:450-8.  
25  
26  
27  
28 11 27. Guo Q, Wu M, Li H, et al. Development and validation of a prognostic nomogram for  
29  
30 12 myocardial infarction patients in intensive care units: a retrospective cohort study. *BMJ*  
31  
32 13 *Open* 2020;10:e040291.  
33  
34  
35  
36 14 28. Wang H, Liu D, Liang H, et al. A nomogram for predicting survival in patients with  
37  
38 15 colorectal cancer incorporating cardiovascular comorbidities. *Front Cardiovasc Med*  
39  
40 16 2022;9:875560.  
41  
42  
43  
44 17  
45  
46  
47  
48  
49  
50  
51  
52  
53  
54  
55  
56  
57  
58  
59  
60

**Table 1. Baseline characteristics, medications, and outcomes of cohorts for developing and validating 30-day prognostic model**

| Variables                       | Derivation cohort<br>(n=15925) | Validation cohort<br>(n=7962) | P value |
|---------------------------------|--------------------------------|-------------------------------|---------|
| <b>Demographics</b>             |                                |                               |         |
| Age, yrs                        | 62.27±12.36                    | 62.54±12.29                   | 0.1122  |
| Female                          | 3878 (24.4)                    | 1940 (24.4)                   | 0.9809  |
| BMI, kg/m <sup>2</sup>          | 24.13±3.05                     | 24.08±3.04                    | 0.2475  |
| <b>Medical history</b>          |                                |                               |         |
| Diabetes                        | 2943 (19.6)                    | 1505 (20.0)                   | 0.4491  |
| Hypertension                    | 7873 (51.2)                    | 3897 (50.8)                   | 0.4970  |
| Hyperlipidemia                  | 1154 (8.5)                     | 569 (8.3)                     | 0.6198  |
| Current smoker                  | 7083 (45.7)                    | 3483 (44.8)                   | 0.2257  |
| Prior angina pectoris           | 4044 (27.8)                    | 1994 (27.4)                   | 0.4987  |
| Prior myocardial infarction     | 1083 (7.4)                     | 553 (7.5)                     | 0.7122  |
| Prior heart failure             | 329 (2.2)                      | 169 (2.3)                     | 0.7723  |
| Prior stroke                    | 1330 (8.8)                     | 711 (9.4)                     | 0.1367  |
| Prior peripheral artery disease | 96 (0.6)                       | 46 (0.6)                      | 0.8073  |
| Prior PCI                       | 753 (5.0)                      | 381 (5.1)                     | 0.8669  |
| Prior CABG                      | 56 (0.4)                       | 36 (0.5)                      | 0.2450  |

|                                   |                       |                       |        |
|-----------------------------------|-----------------------|-----------------------|--------|
| Prior renal dysfunction           | 197 (1.3)             | 94 (1.3)              | 0.6985 |
| COPD                              | 279 (1.9)             | 142 (1.9)             | 0.8702 |
| <b>Presenting characteristics</b> |                       |                       |        |
| Symptom onset to admission time   |                       |                       | 0.1515 |
| 0-6h                              | 7398 (47.0)           | 3625 (46.0)           |        |
| >6h                               | 8330 (53.0)           | 4247 (54.0)           |        |
| Heart rate, beats/min             | 77.45±18.07           | 77.84±18.03           | 0.1131 |
| Systolic blood pressure           | 129.48±25.01          | 129.94±25.26          | 0.1865 |
| Killip class                      |                       |                       | 0.5017 |
| I                                 | 11836 (76.2)          | 5903 (75.8)           |        |
| II-IV                             | 3694 (23.8)           | 1883 (24.2)           |        |
| Cardiac arrest at admission       | 128 (0.8)             | 77 (1.0)              | 0.2092 |
| AMI classification                |                       |                       | 0.4680 |
| STEMI                             | 12051 (75.7)          | 5991 (75.2)           |        |
| NSTEMI                            | 3874 (24.3)           | 1971 (24.8)           |        |
| Anterior wall involvement         | 7406 (47.7)           | 3696 (47.5)           | 0.8342 |
| <b>Laboratory results</b>         |                       |                       |        |
| Creatinine, µmol/L                | 74.90 (62.00, 90.00)  | 74.60 (62.00, 90.40)  | 0.9110 |
| Creatinine clearance, ml/min      | 83.83 (61.61, 109.00) | 83.70 (61.52, 108.71) | 0.3404 |

|                                              |              |              |        |
|----------------------------------------------|--------------|--------------|--------|
| Hemoglobin, g/L                              | 136.23±21.09 | 136.07±20.94 | 0.5897 |
| Leukocyte count, ×10 <sup>9</sup> /L         | 10.09±3.69   | 10.04±3.60   | 0.4052 |
| LVEF, %                                      | 53.84±10.07  | 53.81±10.08  | 0.8202 |
| <b>In-hospital treatment</b>                 |              |              |        |
| PCI                                          | 8951 (57.9)  | 4432 (57.2)  | 0.3550 |
| CABG                                         | 127 (0.8)    | 76 (1.0)     | 0.2190 |
| <b>Adverse events during hospitalization</b> |              |              |        |
| New-onset heart failure                      | 2082 (13.5)  | 1035 (13.4)  | 0.8803 |
| Recurrent myocardial ischemia                | 384 (2.5)    | 166 (2.2)    | 0.1124 |
| Recurrent myocardial infarction              | 61 (0.4)     | 22 (0.3)     | 0.1781 |
| Stroke                                       | 90 (0.6)     | 40 (0.5)     | 0.5349 |
| Other bleeding events                        | 236 (1.5)    | 121 (1.6)    | 0.8112 |
| <b>Medications at discharge</b>              |              |              |        |
| Antiplatelet therapy                         |              |              | 0.4017 |
| Dual antiplatelet therapy                    | 13212 (87.6) | 6571 (87.1)  |        |
| Single antiplatelet therapy                  | 1261 (8.4)   | 648 (8.6)    |        |
| None                                         | 603 (4.0)    | 327 (4.3)    |        |
| Statins                                      | 13846 (91.8) | 6976 (92.4)  | 0.1115 |
| β blockers                                   | 10341 (68.6) | 5006 (66.3)  | 0.0006 |

|  |          |             |             |        |
|--|----------|-------------|-------------|--------|
|  | ACEI/ARB | 8642 (57.3) | 4326 (57.3) | 0.9937 |
|--|----------|-------------|-------------|--------|

1 Values are shown as mean  $\pm$  standard deviation, median (interquartile range), or number (%)  
2 without imputation of missing data. BMI, body mass index; PCI, percutaneous coronary  
3 intervention; CABG, coronary artery bypass graft; COPD, chronic obstructive pulmonary  
4 disease; AMI, acute myocardial infarction; STEMI, ST-segment elevation myocardial  
5 infarction; NSTEMI, non-ST-segment elevation myocardial infarction; LVEF, left ventricular  
6 ejection fraction; ACEI, angiotensin converting enzyme inhibitor; ARB, angiotensin II  
7 receptor blocker.

8

1 **Table 2. Multivariable analysis of 30-day mortality in the derivation cohort**

|                                                                  | <b>All-cause death</b>      |                |
|------------------------------------------------------------------|-----------------------------|----------------|
|                                                                  | <b>Adjusted HR (95% CI)</b> | <b>P value</b> |
| Age (per 1 year increase)                                        | 1.035 (1.021, 1.049)        | <0.0001        |
| Prior stroke (vs no)                                             | 1.560 (1.091-2.231)         | 0.0148         |
| Heart rate (per 1beat/min increase)                              | 1.006 (1.000-1.012)         | 0.0497         |
| Killip class II -IV(vs I )                                       | 1.528 (1.115-2.094)         | 0.0083         |
| LVEF (per 1% increase)                                           | 0.969 (0.955, 0.982)        | <0.0001        |
| In-hospital PCI (vs no)                                          | 0.441 (0.307, 0.634)        | <0.0001        |
| In-hospital recurrent myocardial ischemia (vs no)                | 1.711 (1.019-2.871)         | 0.0421         |
| In-hospital recurrent myocardial infarction (vs no)              | 4.572 (2.121-9.859)         | 0.0001         |
| In-hospital heart failure (vs no)                                | 2.869 (2.065-3.986)         | <0.0001        |
| Antiplatelet therapy at discharge (vs dual antiplatelet therapy) |                             |                |
| Single antiplatelet therapy                                      | 0.791 (0.491-1.275)         | 0.3358         |
| None                                                             | 2.363 (1.395-4.003)         | 0.0014         |
| Statins at discharge (vs no)                                     | 2.009 (1.258-3.208)         | 0.0035         |

2 LVEF, left ventricular ejection fraction; PCI, percutaneous coronary intervention; HR, hazard  
3 ratio; CI, confidence interval.

4



1  
2  
3 **1 Table 3. Multivariable analysis of mortality after 30 days in the derivation cohort**  
4  
5

|                                                                    | <b>All-cause death</b>      |                |
|--------------------------------------------------------------------|-----------------------------|----------------|
|                                                                    | <b>Adjusted HR (95% CI)</b> | <b>P value</b> |
| Age (per 1 year increase)                                          | 1.052 (1.045-1.060)         | <0.0001        |
| Prior renal dysfunction (vs no)                                    | 1.539 (1.076-2.201)         | 0.0181         |
| History of heart failure (vs no)                                   | 1.501 (1.160-1.943)         | 0.0020         |
| STEMI (vs NSTEMI)                                                  | 0.747 (0.639-0.873)         | 0.0002         |
| Heart rate (per 1 beat/min increase)                               | 1.008 (1.005-1.011)         | <0.0001        |
| Killip class II -IV(vs I )                                         | 1.330 (1.129-1.566)         | 0.0006         |
| Hemoglobin (per 1g/L increase)                                     | 0.993 (0.990-0.996)         | <0.0001        |
| LVEF (per 1% increase)                                             | 0.971 (0.964-0.978)         | <0.0001        |
| In-hospital PCI (vs no)                                            | 0.423 (0.351-0.510)         | <0.0001        |
| In-hospital heart failure(vs no)                                   | 1.287 (1.085-1.525)         | 0.0037         |
| Heart failure worsening within 30 days (vs no)                     | 1.675 (1.258-2.229)         | 0.0004         |
| Antiplatelet therapy within 30 days (vs dual antiplatelet therapy) |                             |                |
| Single antiplatelet therapy                                        | 1.107 (0.911-1.345)         | 0.3084         |
| None                                                               | 1.430 (1.055-1.937)         | 0.0211         |
| $\beta$ blocker within 30 days (vs yes)                            | 1.271 (1.085-1.491)         | 0.0031         |
| Statins within 30 days (vs yes)                                    | 1.191 (0.908-1.561)         | 0.2075         |

1  
2  
3 1 STEMI, ST-segment elevation myocardial infarction; NSTEMI, non-ST-segment elevation  
4  
5 2 myocardial infarction; LVEF, left ventricular ejection fraction; PCI, percutaneous coronary  
6  
7 3 intervention; HR, hazard ratio; CI, confidence interval.  
8  
9  
10  
11 4  
12  
13  
14  
15  
16  
17  
18  
19  
20  
21  
22  
23  
24  
25  
26  
27  
28  
29  
30  
31  
32  
33  
34  
35  
36  
37  
38  
39  
40  
41  
42  
43  
44  
45  
46  
47  
48  
49  
50  
51  
52  
53  
54  
55  
56  
57  
58  
59  
60

**Table 4. Comparison of 30-day prognostic models with or without adverse events and medications**

|                                 | <b>30-day model 0</b> | <b>30-day model 1</b> |
|---------------------------------|-----------------------|-----------------------|
| C index                         | 0.822 (0.796-0.848)   | 0.855 (0.830-0.879)   |
| NRI (95%CI)                     |                       | 0.445 (0.339-0.523)   |
| P value                         |                       | <0.0001               |
| IDI (95%CI)                     |                       | 0.040 (0.025-0.074)   |
| P value                         |                       | <0.0001               |
| Likelihood ratio test (P value) |                       | <0.0001               |
| BIC                             | 3434.091              | 3350.882              |

30-days Model 0: age, prior stroke, heart rate, Killip class, LVEF, and in-hospital PCI. 30-day Model 1: age, prior stroke, heart rate, Killip class, LVEF, in-hospital PCI, in-hospital recurrent myocardial ischemia, in-hospital recurrent myocardial infarction, in-hospital heart failure, antiplatelet therapy, and statins at discharge. LVEF, left ventricular ejection fraction; PCI, percutaneous coronary intervention; NRI, net reclassification index; CI, confidence interval; IDI, integrated discrimination improvement index; BIC, Bayesian information criteria.

**Table 5. Comparison of 2-year prognostic models with or without adverse events and medications**

|                                 | <b>2-year model 0</b> | <b>2-year model 1</b> |
|---------------------------------|-----------------------|-----------------------|
| C index                         | 0.822 (0.807-0.836)   | 0.825 (0.811-0.839)   |
| NRI (95%CI)                     |                       | 0.119 (-0.045-0.176)  |
| P value                         |                       | 0.126                 |
| IDI (95%CI)                     |                       | 0.008 (0.004-0.017)   |
| P value                         |                       | 0.007                 |
| Likelihood ratio test (P value) |                       | <0.0001               |
| BIC                             | 12792.602             | 12785.706             |

2-year Model 0: age, prior renal dysfunction, prior heart failure, AMI classification, heart rate, Killip class, hemoglobin, LVEF, in-hospital PCI, and in-hospital heart failure. 2-year Model 1: age, prior renal dysfunction, prior heart failure, AMI classification, heart rate, Killip class, hemoglobin, LVEF, in-hospital PCI, in-hospital heart failure, heart failure worsening within 30 days, antiplatelet therapy,  $\beta$  blockers, and statins within 30 days. AMI, acute myocardial infarction; LVEF, left ventricular ejection fraction; PCI, percutaneous coronary intervention; NRI, net reclassification index; CI, confidence interval; IDI, integrated discrimination improvement index; BIC, Bayesian information criteria.

## 1           2 3       1   **FIGURE LEGENDS** 4 5

6       2   **Figure 1. Nomogram for predicting 30-day survival probability.** The observed value of a  
7  
8       3   prognostic index was assigned a point by drawing a perpendicular line towards the top scale.  
9  
10      4   The sum of points for each index was plotted on the “Total points” scale, and corresponded to  
11  
12      5   the probability of 30-day survival at the bottom with a vertical line. LVEF, left ventricular  
13  
14      6   ejection fraction; PCI, percutaneous coronary intervention.  
15  
16  
17

18      7  
19  
20  
21      8   **Figure 2. Nomogram for predicting 2-year survival probability.** The observed value of a  
22  
23      9   prognostic index was assigned a point by drawing a perpendicular line towards the top scale.  
24  
25     10   The sum of points for each index was plotted on the “Total points” scale, and corresponded to  
26  
27     11   the probability of 2-year survival at the bottom with a vertical line. AMI, acute myocardial  
28  
29     12   infarction; LVEF, left ventricular ejection fraction; PCI, percutaneous coronary intervention.  
30  
31  
32

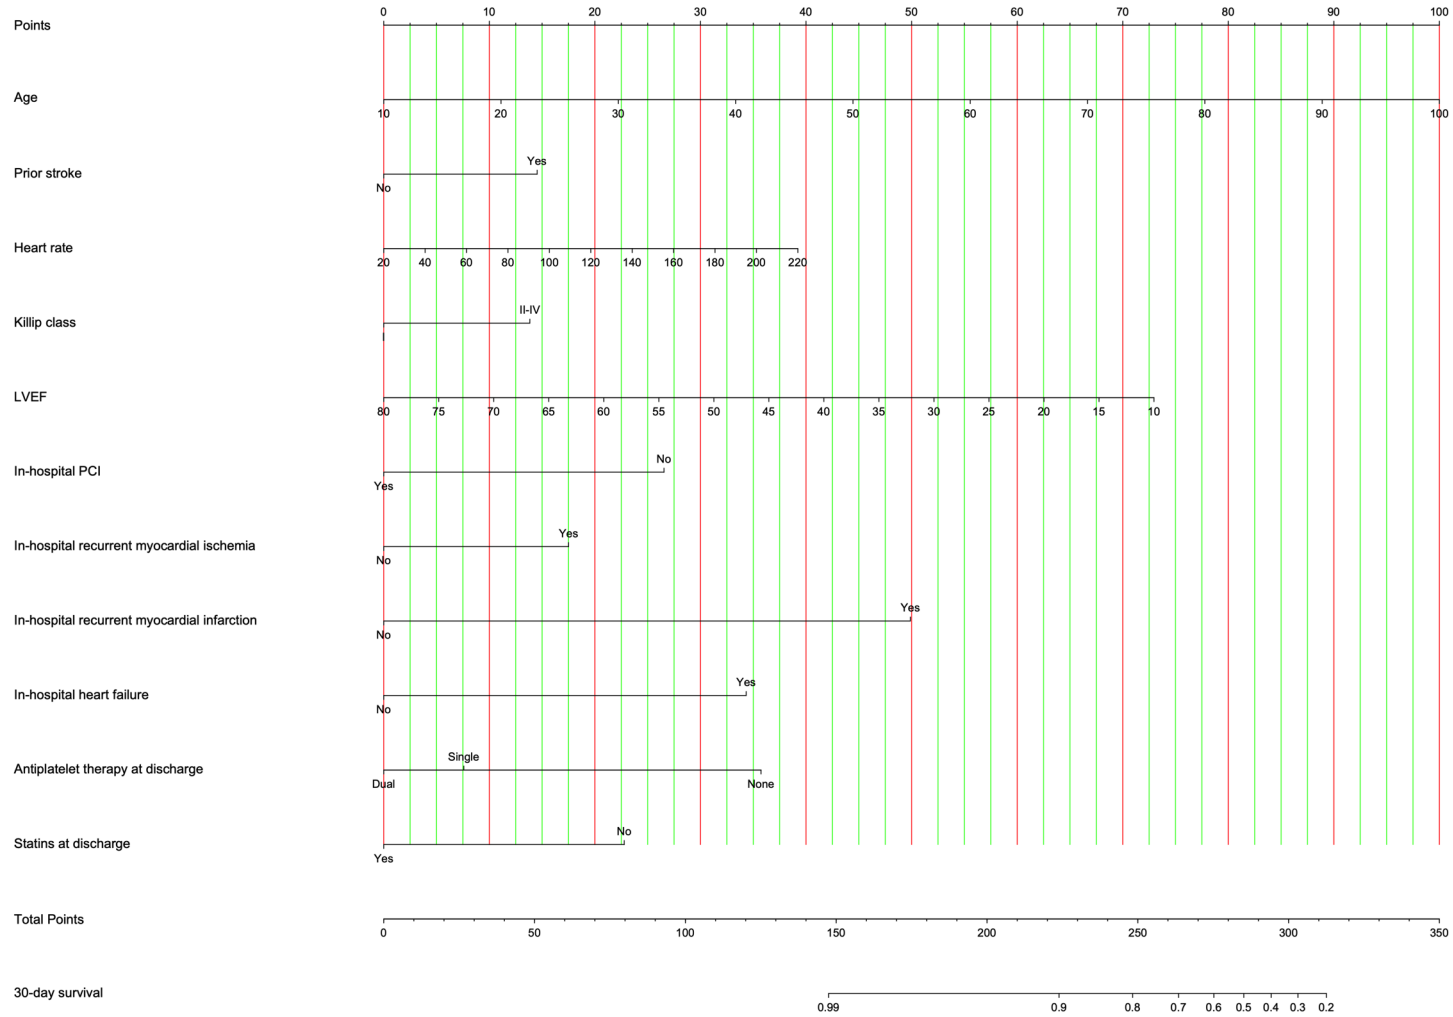

1  
2  
3  
4  
5  
6  
7  
8  
9  
10  
11  
12  
13  
14  
15  
16  
17  
18  
19  
20  
21  
22  
23  
24  
25  
26  
27  
28  
29  
30  
31  
32  
33  
34  
35  
36  
37  
38  
39  
40  
41  
42  
43  
44  
45  
46

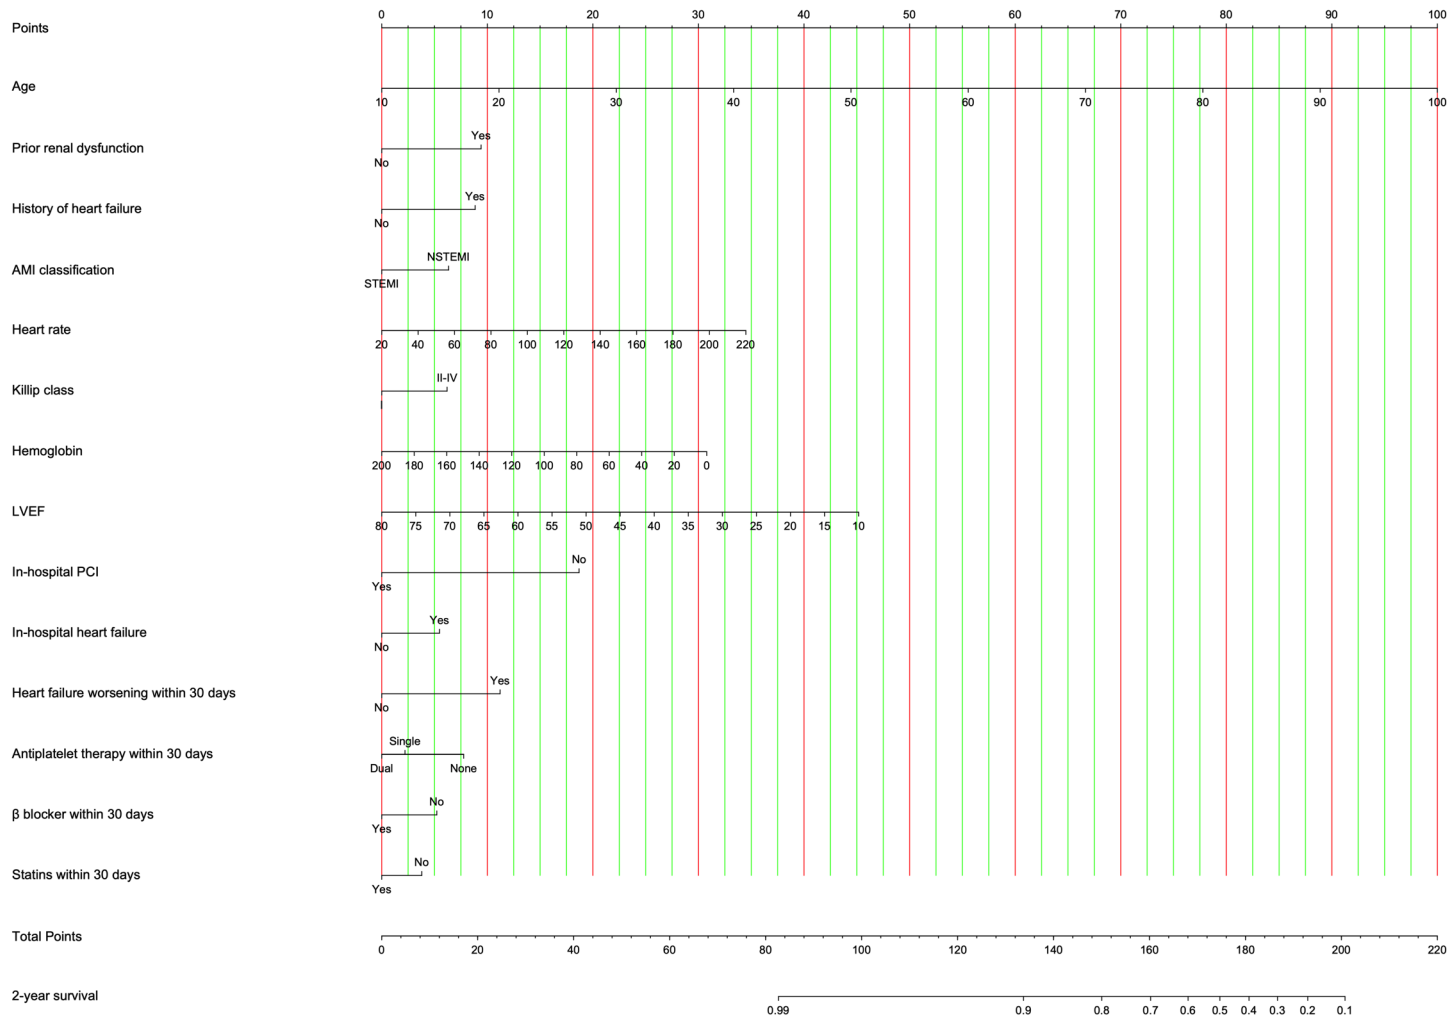

## Supplemental Materials

**Junxing Lv et al. Dynamic risk prediction in patients following acute myocardial infarction.**

### I. Supplemental Tables.

**Supplemental Table 1. Baseline characteristics, medications, and outcomes of cohorts for developing and validating 2-year prognostic model.**

**Supplemental Table 2. Univariable analysis of 30-day mortality.**

**Supplemental Table 3. Univariable analysis of mortality after 30 days.**

**Supplemental Table 4. Discrimination of 30-day prognostic nomogram in subgroups of patients.**

**Supplemental Table 5. Discrimination of 2-year prognostic nomogram in subgroups of patients.**

### II. Supplemental Figures.

**Supplemental Figure 1. Flowchart of this study.** AMI, acute myocardial infarction.

**Supplemental Figure 2. Kaplan-Meier curve for patients after AMI hospitalization.** AMI, acute myocardial infarction.

**Supplemental Figure 3. Density plots for all-cause death and recurrent myocardial infarction during follow-up.** (A) Density plot for all-cause death. (B) Density plot for recurrent myocardial infarction.

**Supplemental Figure 4. Variable selection by LASSO method for 30-day prognostic model in imputation dataset 1.** (A) The plot showing partial likelihood deviance values versus  $\log(\lambda)$ . Tuning parameter  $\lambda$  selection used 10-fold cross-validation. The vertical lines were drawn at optimal values by the minimum criteria and the 1 SE of minimum criteria. The lambda with 1 SE of minimum deviance was used for variable selection. (B) The coefficient profile plot. The plot was produced against the  $\log(\lambda)$  sequence. LASSO, least absolute



shrinkage and selection operator; SE, standard error.

**Supplemental Figure 5. Variable selection by LASSO method for 30-day prognostic model in imputation dataset 2.** (A) The plot showing partial likelihood deviance values versus  $\log(\lambda)$ . Tuning parameter  $\lambda$  selection used 10-fold cross-validation. The vertical lines were drawn at optimal values by the minimum criteria and the 1 SE of minimum criteria. The lambda with 1 SE of minimum deviance was used for variable selection. (B) The coefficient profile plot. The plot was produced against the  $\log(\lambda)$  sequence. LASSO, least absolute shrinkage and selection operator; SE, standard error.

**Supplemental Figure 6. Variable selection by LASSO method for 30-day prognostic model in imputation dataset 3.** (A) The plot showing partial likelihood deviance values versus  $\log(\lambda)$ . Tuning parameter  $\lambda$  selection used 10-fold cross-validation. The vertical lines were drawn at optimal values by the minimum criteria and the 1 SE of minimum criteria. The lambda with 1 SE of minimum deviance was used for variable selection. (B) The coefficient profile plot. The plot was produced against the  $\log(\lambda)$  sequence. LASSO, least absolute shrinkage and selection operator; SE, standard error.

**Supplemental Figure 7. Variable selection by LASSO method for 30-day prognostic model in imputation dataset 4.** (A) The plot showing partial likelihood deviance values versus  $\log(\lambda)$ . Tuning parameter  $\lambda$  selection used 10-fold cross-validation. The vertical lines were drawn at optimal values by the minimum criteria and the 1 SE of minimum criteria. The lambda with 1 SE of minimum deviance was used for variable selection. (B) The coefficient profile plot. The plot was produced against the  $\log(\lambda)$  sequence. LASSO, least absolute shrinkage and selection operator; SE, standard error.

**Supplemental Figure 8. Variable selection by LASSO method for 30-day prognostic model in imputation dataset 5.** (A) The plot showing partial likelihood deviance values versus  $\log(\lambda)$ . Tuning parameter  $\lambda$  selection used 10-fold cross-validation. The vertical lines were drawn at optimal values by the minimum criteria and the 1 SE of minimum criteria. The lambda with 1 SE of minimum deviance was used for variable selection. (B) The coefficient profile plot. The plot was produced against the  $\log(\lambda)$  sequence. LASSO, least absolute shrinkage and selection operator; SE, standard error.

**Supplemental Figure 9. Relative importance of selected predictors for 30-day mortality.** Relative importance of variables selected by LASSO method was ranked according to the proportion of explainable log-likelihood ratio  $\chi^2$  statistics. LASSO, least absolute shrinkage and selection operator; Mi, myocardial ischemia; MI, myocardial infarction; PCI, percutaneous coronary intervention; LVEF, left ventricular ejection fraction; HF, heart failure.

**Supplemental Figure 10. Variable selection by LASSO method for 2-year prognostic model in imputation dataset 1.** (A) The plot showing partial likelihood deviance values

1  
2  
3 versus  $\log(\lambda)$ . Tuning parameter  $\lambda$  selection used 10-fold cross-validation. The vertical lines  
4 were drawn at values by the minimum criteria and the 1 SE of minimum criteria. The lambda  
5 with 1 SE of minimum deviance was used for variable selection. (B) The coefficient profile  
6 plot. The plot was produced against the  $\log(\lambda)$  sequence. LASSO, least absolute shrinkage and  
7 selection operator; SE, standard error.  
8  
9

10  
11 **Supplemental Figure 11. Variable selection by LASSO method for 2-year prognostic**  
12 **model in imputation dataset 2.** (A) The plot showing partial likelihood deviance values  
13 versus  $\log(\lambda)$ . Tuning parameter  $\lambda$  selection used 10-fold cross-validation. The vertical lines  
14 were drawn at values by the minimum criteria and the 1 SE of minimum criteria. The lambda  
15 with 1 SE of minimum deviance was used for variable selection. (B) The coefficient profile  
16 plot. The plot was produced against the  $\log(\lambda)$  sequence. LASSO, least absolute shrinkage and  
17 selection operator; SE, standard error.  
18  
19

20  
21  
22 **Supplemental Figure 12. Variable selection by LASSO method for 2-year prognostic**  
23 **model in imputation dataset 3.** (A) The plot showing partial likelihood deviance values  
24 versus  $\log(\lambda)$ . Tuning parameter  $\lambda$  selection used 10-fold cross-validation. The vertical lines  
25 were drawn at optimal values by the minimum criteria and the 1 SE of minimum criteria. The  
26 lambda with 1 SE of minimum deviance was used for variable selection. (B) The coefficient  
27 profile plot. The plot was produced against the  $\log(\lambda)$  sequence. LASSO, least absolute  
28 shrinkage and selection operator; SE, standard error.  
29  
30

31  
32  
33 **Supplemental Figure 13. Variable selection by LASSO method for 2-year prognostic**  
34 **model in imputation dataset 4.** (A) The plot showing partial likelihood deviance values  
35 versus  $\log(\lambda)$ . Tuning parameter  $\lambda$  selection used 10-fold cross-validation. The vertical lines  
36 were drawn at optimal values by the minimum criteria and the 1 SE of minimum criteria. The  
37 lambda with 1 SE of minimum deviance was used for variable selection. (B) The coefficient  
38 profile plot. The plot was produced against the  $\log(\lambda)$  sequence. LASSO, least absolute  
39 shrinkage and selection operator; SE, standard error.  
40  
41

42  
43  
44 **Supplemental Figure 14. Variable selection by LASSO method for 2-year prognostic**  
45 **model in imputation dataset 5.** (A) The plot showing partial likelihood deviance values  
46 versus  $\log(\lambda)$ . Tuning parameter  $\lambda$  selection used 10-fold cross-validation. The vertical lines  
47 were drawn at optimal values by the minimum criteria and the 1 SE of minimum criteria. The  
48 lambda with 1 SE of minimum deviance was used for variable selection. (B) The coefficient  
49 profile plot. The plot was produced against the  $\log(\lambda)$  sequence. LASSO, least absolute  
50 shrinkage and selection operator; SE, standard error.  
51  
52

53  
54  
55 **Supplemental Figure 15. Relative importance of selected predictors for 2-year mortality.**  
56 Relative importance of variables selected by LASSO method was ranked according to the  
57 proportion of explainable log-likelihood ratio  $\chi^2$  statistics. LASSO, least absolute shrinkage  
58 and selection operator; HF, heart failure; AMI, acute myocardial infarction; LVEF, left  
59 ventricular ejection fraction; PCI, percutaneous coronary intervention.  
60

1  
2  
3  
4  
5 **Supplemental Figure 16. Comparisons of clinical utilities between models with or**  
6 **without adverse events and medications.** The red and green lines represent the assumption  
7 that all or none patients at high risk with different thresholds. The lines in the upper right  
8 represent the risk prediction models. (A) Comparison of clinical utilities between 30-day  
9 model with or without adverse events and medications. (B) Comparison of clinical utilities  
10 between 2-year model with or without adverse events and medications.  
11  
12  
13  
14  
15

16 **Supplemental Figure 17. Comparisons of clinical utilities between models and GRACE**  
17 **risk score.** The red and green lines represent the assumption that all or none patients at high  
18 risk with different thresholds. The lines in the upper right represent the risk prediction models.  
19 (A) Comparison of clinical utilities between 30-day model and GRACE risk score. (B)  
20 Comparison of clinical utilities between 2-year model and GRACE risk score. GRACE,  
21 Global Registry of Acute Coronary Events.  
22  
23  
24  
25  
26

27 **Supplemental Figure 18. Calibration curves of 30-day prognostic nomogram.** Calibration  
28 curves present the relationship between observed and predicted survival probabilities by 30-  
29 day prognostic nomogram in both derivation and validation cohorts. (A) Calibration curve of  
30 30-day prognostic nomogram in derivation cohort. (B) Calibration curve of 30-day prognostic  
31 nomogram in validation cohort.  
32  
33  
34  
35

36 **Supplemental Figure 19. Calibration curves of 2-year prognostic nomogram.** Calibration  
37 curves present the relationship between observed and predicted survival probabilities by 2-  
38 year prognostic nomogram in both derivation and validation cohorts. (A) Calibration curve of  
39 2-year prognostic nomogram in derivation cohort. (B) Calibration curve of 2-year prognostic  
40 nomogram in validation cohort.  
41  
42  
43  
44  
45  
46  
47  
48  
49  
50  
51  
52  
53  
54  
55  
56  
57  
58  
59  
60

**I. Supplemental Tables.**

**Supplemental Table 1. Baseline characteristics, medications, and outcomes of cohorts for developing and validating 2-year prognostic model**

| Variables                         | Derivation cohort (n=12136) | Validation cohort (n=6067) | P value |
|-----------------------------------|-----------------------------|----------------------------|---------|
| <b>Demographics</b>               |                             |                            |         |
| Age, yrs                          | 62.08±12.28                 | 62.26±12.20                | 0.3634  |
| Female                            | 2967 (24.4)                 | 1459 (24.0)                | 0.5531  |
| BMI, kg/m <sup>2</sup>            | 24.12±3.02                  | 24.11±3.01                 | 0.8755  |
| <b>Medical history</b>            |                             |                            |         |
| Diabetes                          | 2213 (19.0)                 | 1146 (19.6)                | 0.2974  |
| Hypertension                      | 6021 (50.6)                 | 3011 (50.7)                | 0.8935  |
| Hyperlipidemia                    | 760 (7.2)                   | 382 (7.2)                  | 0.9871  |
| Current smoker                    | 5565 (46.3)                 | 2737 (45.5)                | 0.3511  |
| Prior angina pectoris             | 3173 (28.0)                 | 1571 (27.8)                | 0.7999  |
| Prior myocardial infarction       | 821 (7.2)                   | 420 (7.3)                  | 0.6981  |
| Prior heart failure               | 243 (2.1)                   | 120 (2.1)                  | 0.9227  |
| Prior stroke                      | 1038 (8.8)                  | 572 (9.7)                  | 0.0503  |
| Prior peripheral artery disease   | 72 (0.6)                    | 30 (0.5)                   | 0.3967  |
| Prior PCI                         | 562 (4.8)                   | 293 (5.0)                  | 0.5356  |
| Prior CABG                        | 38 (0.3)                    | 25 (0.4)                   | 0.2883  |
| Prior renal dysfunction           | 130 (1.1)                   | 56 (1.0)                   | 0.3474  |
| COPD                              | 221 (1.9)                   | 114 (2.0)                  | 0.7794  |
| <b>Presenting characteristics</b> |                             |                            |         |
| Symptom onset to admission time   |                             |                            | 0.1659  |
| 0-6h                              | 5725 (47.6)                 | 2798 (46.5)                |         |
| >6h                               | 6298 (52.4)                 | 3216 (53.5)                |         |
| Heart rate, beats/min             | 77.37±18.06                 | 77.63±18.04                | 0.3710  |
| Systolic blood pressure           | 129.61±25.30                | 130.00±25.52               | 0.3250  |
| Killip class                      |                             |                            | 0.8824  |
| I                                 | 9163 (76.2)                 | 4589 (76.3)                |         |
| II-IV                             | 2859 (23.8)                 | 1424 (23.7)                |         |
| Cardiac arrest at admission       | 95 (0.8)                    | 62 (1.0)                   | 0.1055  |

|    |                                              |                       |                       |        |
|----|----------------------------------------------|-----------------------|-----------------------|--------|
| 1  |                                              |                       |                       |        |
| 2  |                                              |                       |                       |        |
| 3  | AMI classification                           |                       |                       | 0.2540 |
| 4  |                                              |                       |                       |        |
| 5  | STEMI                                        | 9215 (75.9)           | 4560 (75.2)           |        |
| 6  |                                              |                       |                       |        |
| 7  | NSTEMI                                       | 2921 (24.1)           | 1507 (24.8)           |        |
| 8  |                                              |                       |                       |        |
| 9  | Anterior wall involvement                    | 5743 (47.7)           | 2843 (47.2)           | 0.5888 |
| 10 | <b>Laboratory results</b>                    |                       |                       |        |
| 11 |                                              |                       |                       |        |
| 12 | Creatinine, $\mu\text{mol/L}$                | 74.00 (61.80, 89.10)  | 73.90 (61.40, 89.60)  | 0.7455 |
| 13 |                                              |                       |                       |        |
| 14 | Creatinine clearance, ml/min                 | 84.53 (62.60, 109.58) | 84.92 (63.22, 110.16) | 0.9369 |
| 15 |                                              |                       |                       |        |
| 16 | Hemoglobin, g/L                              | 136.37 $\pm$ 20.82    | 136.39 $\pm$ 20.79    | 0.9582 |
| 17 |                                              |                       |                       |        |
| 18 | Leukocyte count, $\times 10^9/\text{L}$      | 10.09 $\pm$ 3.65      | 10.02 $\pm$ 3.52      | 0.1737 |
| 19 |                                              |                       |                       |        |
| 20 | LVEF, %                                      | 54.08 $\pm$ 10.00     | 54.01 $\pm$ 9.94      | 0.7200 |
| 21 | <b>In-hospital treatment</b>                 |                       |                       |        |
| 22 |                                              |                       |                       |        |
| 23 | In-hospital PCI                              | 6998 (58.4)           | 3468 (57.7)           | 0.4281 |
| 24 |                                              |                       |                       |        |
| 25 | In-hospital CABG                             | 87 (0.7)              | 50 (0.8)              | 0.4388 |
| 26 |                                              |                       |                       |        |
| 27 | <b>Adverse events during hospitalization</b> |                       |                       |        |
| 28 |                                              |                       |                       |        |
| 29 | New-onset heart failure                      | 1616 (13.5)           | 805 (13.5)            | 0.9477 |
| 30 |                                              |                       |                       |        |
| 31 | Recurrent myocardial ischemia                | 281 (2.3)             | 125 (2.1)             | 0.2736 |
| 32 |                                              |                       |                       |        |
| 33 | Recurrent myocardial infarction              | 37 (0.3)              | 18 (0.3)              | 0.9259 |
| 34 |                                              |                       |                       |        |
| 35 | Stroke                                       | 65 (0.5)              | 29 (0.5)              | 0.6109 |
| 36 |                                              |                       |                       |        |
| 37 | Other bleeding events                        | 183 (1.5)             | 94 (1.6)              | 0.8199 |
| 38 | <b>Medications within 30 days</b>            |                       |                       |        |
| 39 |                                              |                       |                       |        |
| 40 | Antiplatelet therapy                         |                       |                       | 0.4345 |
| 41 |                                              |                       |                       |        |
| 42 | Dual antiplatelet therapy                    | 10518 (86.7)          | 5287 (87.1)           |        |
| 43 |                                              |                       |                       |        |
| 44 | Single antiplatelet therapy                  | 1292 (10.6)           | 610 (10.1)            |        |
| 45 |                                              |                       |                       |        |
| 46 | None                                         | 326 (2.7)             | 170 (2.8)             |        |
| 47 |                                              |                       |                       |        |
| 48 | Statins                                      | 11486 (94.6)          | 5736 (94.5)           | 0.7789 |
| 49 |                                              |                       |                       |        |
| 50 | $\beta$ blockers                             | 8751 (72.1)           | 4347 (71.6)           | 0.5171 |
| 51 |                                              |                       |                       |        |
| 52 | ACEI/ARB                                     | 7221 (59.5)           | 3591 (59.2)           | 0.6866 |

Values are shown as mean  $\pm$  standard deviation, median (interquartile range), or number (%) without imputation of missing data. BMI, body mass index; PCI, percutaneous coronary intervention; CABG, coronary artery bypass graft; COPD, chronic obstructive pulmonary disease; AMI, acute myocardial infarction; STEMI, ST-segment elevation myocardial infarction; NSTEMI, non-ST-segment elevation myocardial infarction; LVEF, left ventricular ejection fraction; ACEI, angiotensin converting enzyme inhibitor; ARB, angiotensin II

1  
2  
3 receptor blocker.  
4  
5  
6  
7  
8  
9  
10  
11  
12  
13  
14  
15  
16  
17  
18  
19  
20  
21  
22  
23  
24  
25  
26  
27  
28  
29  
30  
31  
32  
33  
34  
35  
36  
37  
38  
39  
40  
41  
42  
43  
44  
45  
46  
47  
48  
49  
50  
51  
52  
53  
54  
55  
56  
57  
58  
59  
60

For peer review only

**Supplemental Table 2. Univariable analysis of 30-day mortality**

|                                                   | <b>Unadjusted HR (95% CI)</b> | <b>P value</b> |
|---------------------------------------------------|-------------------------------|----------------|
| Age (per 1 year increase)                         | 1.066 (1.052, 1.080)          | <0.0001        |
| Women (vs men)                                    | 1.662 (1.233, 2.241)          | 0.0009         |
| BMI (per 1kg/m <sup>2</sup> increase)             | 0.893 (0.850, 0.939)          | <0.0001        |
| Diabetes (vs no)                                  | 1.545 (1.123, 2.126)          | 0.0075         |
| Hypertension (vs no)                              | 1.289 (0.958, 1.734)          | 0.0930         |
| Hyperlipidemia (vs no)                            | 0.749 (0.406, 1.384)          | 0.3547         |
| Current smoking (vs no)                           | 0.406 (0.293, 0.563)          | <0.0001        |
| Prior angina pectoris (vs no)                     | 1.324 (0.972, 1.803)          | 0.0754         |
| Prior myocardial infarction (vs no)               | 1.177 (0.709, 1.954)          | 0.5284         |
| Prior heart failure (vs no)                       | 5.078 (3.166, 8.144)          | <0.0001        |
| Prior stroke (vs no)                              | 2.627 (1.842, 3.747)          | <0.0001        |
| Prior PCI (vs no)                                 | 0.814 (0.400, 1.659)          | 0.5717         |
| Prior CABG (vs no)                                | —                             | —              |
| Prior renal dysfunction (vs no)                   | 1.596 (0.587, 4.338)          | 0.3591         |
| COPD (vs no)                                      | 3.208 (1.744, 5.901)          | 0.0002         |
| Prior peripheral artery disease (vs no)           | —                             | —              |
| Symptom onset to admission time (vs 0-6h)         |                               |                |
| >6h                                               | 1.947 (1.431, 2.649)          | <0.0001        |
| Heart rate (per 1 beat increase)                  | 1.024 (1.018, 1.029)          | <0.0001        |
| Systolic blood pressure (per 1mmHg increase)      | 0.994 (0.988, 1.000)          | 0.0358         |
| Killip class (vs I)                               |                               |                |
| II-IV                                             | 3.980 (2.990, 5.298)          | <0.0001        |
| Cardiac arrest at admission (vs no)               | 1.921 (0.614, 6.011)          | 0.2620         |
| NSTEMI (vs STEMI)                                 | 1.230 (0.898, 1.686)          | 0.1977         |
| Anterior wall involvement (vs no)                 | 1.255 (0.943, 1.671)          | 0.1185         |
| Creatinine clearance (vs >90 ml/min)              |                               |                |
| 60-90                                             | 1.805 (1.222, 2.666)          | 0.0030         |
| ≤60                                               | 4.252 (2.985, 6.058)          | <0.0001        |
| Hemoglobin (per 1g/L increase)                    | 0.988 (0.983, 0.993)          | <0.0001        |
| Leukocyte count (per 10 <sup>9</sup> /L increase) | 1.055 (1.023, 1.088)          | 0.0006         |

|    |                                                                |                        |         |
|----|----------------------------------------------------------------|------------------------|---------|
| 1  |                                                                |                        |         |
| 2  |                                                                |                        |         |
| 3  | LVEF (per 1% increase)                                         | 0.938 (0.923, 0.952)   | <0.0001 |
| 4  |                                                                |                        |         |
| 5  | In-hospital PCI (vs no)                                        | 0.220 (0.157, 0.308)   | <0.0001 |
| 6  |                                                                |                        |         |
| 7  | In-hospital CABG (vs no)                                       | 1.277 (0.317, 5.145)   | 0.7308  |
| 8  |                                                                |                        |         |
| 9  | New-onset heart failure during hospitalization (vs no)         | 7.204 (5.414, 9.585)   | <0.0001 |
| 10 |                                                                |                        |         |
| 11 | Recurrent myocardial ischemia during hospitalization (vs no)   | 6.028 (3.938, 9.228)   | <0.0001 |
| 12 |                                                                |                        |         |
| 13 | Recurrent myocardial infarction during hospitalization (vs no) | 13.299 (6.752, 26.195) | <0.0001 |
| 14 |                                                                |                        |         |
| 15 |                                                                |                        |         |
| 16 | Stroke during hospitalization (vs no)                          | 2.908 (0.934, 9.052)   | 0.0654  |
| 17 |                                                                |                        |         |
| 18 | Other bleeding events during hospitalization (vs no)           | 4.109 (2.235, 7.558)   | <0.0001 |
| 19 |                                                                |                        |         |
| 20 | Antiplatelet therapy at discharge (vs dual therapy)            |                        |         |
| 21 |                                                                |                        |         |
| 22 | Single antiplatelet therapy                                    | 1.344 (0.762, 2.372)   | 0.3024  |
| 23 |                                                                |                        |         |
| 24 | none                                                           | 5.158 (3.468, 7.672)   | <0.0001 |
| 25 |                                                                |                        |         |
| 26 | Statins at discharge (vs no)                                   | 3.180 (2.246, 4.502)   | <0.0001 |
| 27 |                                                                |                        |         |
| 28 | $\beta$ blockers at discharge (vs no)                          | 1.483 (1.105, 1.991)   | 0.0087  |
| 29 |                                                                |                        |         |
| 30 | ACEI/ARB at discharge (vs no)                                  | 1.481 (1.088, 2.017)   | 0.0128  |

BMI, body mass index; PCI, percutaneous coronary intervention; CABG, coronary artery bypass graft; COPD, chronic obstructive pulmonary disease; NSTEMI, non-ST-segment elevation myocardial infarction; STEMI, ST-segment elevation myocardial infarction; LVEF, left ventricular ejection fraction; ACEI, angiotensin converting enzyme inhibitor; ARB, angiotensin II receptor blocker; HR, hazard ratio; CI, confidence interval.



**Supplemental Table 3. Univariable analysis of mortality after 30 days**

|                                                   | <b>Unadjusted HR (95% CI)</b> | <b>P value</b> |
|---------------------------------------------------|-------------------------------|----------------|
| Age (per 1 year increase)                         | 1.084 (1.076, 1.092)          | <0.0001        |
| Women (vs men)                                    | 1.947 (1.679, 2.259)          | <0.0001        |
| BMI (per 1kg/m <sup>2</sup> increase)             | 0.895 (0.872, 0.919)          | <0.0001        |
| Diabetes (vs no)                                  | 1.571 (1.328, 1.857)          | <0.0001        |
| Hypertension (vs no)                              | 1.533 (1.321, 1.779)          | <0.0001        |
| Hyperlipidemia (vs no)                            | 0.631 (0.443, 0.900)          | 0.0111         |
| Current smoking (vs no)                           | 0.423 (0.359, 0.498)          | <0.0001        |
| Prior angina pectoris (vs no)                     | 1.318 (1.131, 1.536)          | 0.0004         |
| Prior myocardial infarction (vs no)               | 2.064 (1.657, 2.570)          | <0.0001        |
| Prior heart failure (vs no)                       | 5.964 (4.685, 7.594)          | <0.0001        |
| Prior stroke (vs no)                              | 2.013 (1.651, 2.455)          | <0.0001        |
| Prior PCI (vs no)                                 | 1.122 (0.817, 1.540)          | 0.4770         |
| Prior CABG (vs no)                                | 1.656 (0.618, 4.433)          | 0.3156         |
| Prior renal dysfunction (vs no)                   | 4.383 (2.969, 6.470)          | <0.0001        |
| COPD (vs no)                                      | 2.897 (2.076, 4.044)          | <0.0001        |
| Prior peripheral artery disease (vs no)           | 2.273 (1.197, 4.314)          | 0.0122         |
| Symptom onset to admission time (vs 0-6h)         |                               |                |
| >6h                                               | 1.497 (1.287, 1.742)          | <0.0001        |
| Heart rate (per 1 beat increase)                  | 1.021 (1.018, 1.024)          | <0.0001        |
| Systolic blood pressure (per 1mmHg increase)      | 1.005 (1.002, 1.008)          | 0.0005         |
| Killip class (vs I)                               |                               |                |
| II-IV                                             | 3.225 (2.792, 3.726)          | <0.0001        |
| Cardiac arrest at admission (vs no)               | 1.068 (0.478, 2.388)          | 0.8724         |
| NSTEMI (vs STEMI)                                 | 2.395 (2.070, 2.771)          | <0.0001        |
| Anterior wall involvement (vs no)                 | 1.210 (1.047, 1.398)          | 0.0096         |
| Creatinine clearance (vs >90 ml/min)              |                               |                |
| 60-90                                             | 1.725 (1.405, 2.119)          | <0.0001        |
| ≤60                                               | 5.193 (4.328, 6.231)          | <0.0001        |
| Hemoglobin (per 1g/L increase)                    | 0.980 (0.978, 0.983)          | <0.0001        |
| Leukocyte count (per 10 <sup>9</sup> /L increase) | 1.010 (0.990, 1.030)          | 0.3333         |

1  
2  
3  
4  
5  
6  
7  
8  
9  
10  
11  
12  
13  
14  
15  
16  
17  
18  
19  
20  
21  
22  
23  
24  
25  
26  
27  
28  
29  
30  
31  
32  
33  
34  
35  
36  
37  
38  
39  
40  
41  
42  
43  
44  
45  
46  
47  
48  
49  
50  
51  
52  
53  
54  
55  
56  
57  
58  
59  
60

|                                                                    |                      |         |
|--------------------------------------------------------------------|----------------------|---------|
| LVEF (per 1% increase)                                             | 0.948 (0.941, 0.955) | <0.0001 |
| In-hospital PCI (vs no)                                            | 0.207 (0.175, 0.246) | <0.0001 |
| In-hospital CABG (vs no)                                           | 0.421 (0.106, 1.674) | 0.2184  |
| New-onset heart failure during hospitalization (vs no)             | 3.418 (2.932, 3.984) | <0.0001 |
| Recurrent myocardial ischemia during hospitalization (vs no)       | 2.653 (1.949, 3.610) | <0.0001 |
| Recurrent myocardial infarction during hospitalization (vs no)     | 1.773 (0.659, 4.771) | 0.2565  |
| Stroke during hospitalization (vs no)                              | 3.455 (1.991, 5.996) | <0.0001 |
| Other bleeding events during hospitalization (vs no)               | 2.233 (1.486, 3.356) | 0.0001  |
| Recurrent myocardial infarction within 30 days (vs no)             | 3.032 (1.130-8.134)  | 0.0276  |
| Heart failure worsening within 30 days (vs no)                     | 4.790 (3.631, 6.319) | <0.001  |
| Antiplatelet therapy within 30 days (vs dual antiplatelet therapy) |                      |         |
| Single antiplatelet therapy                                        | 2.147 (1.779, 2.591) | <0.0001 |
| none                                                               | 4.371 (3.385, 5.643) | <0.0001 |
| Statins within 30 days (vs no)                                     | 2.454 (1.960, 3.073) | <0.0001 |
| $\beta$ blockers within 30 days (vs no)                            | 1.594 (1.374, 1.850) | <0.0001 |
| ACEI/ARB within 30 days (vs no)                                    | 1.153 (0.997, 1.333) | 0.0546  |

---

BMI, body mass index; PCI, percutaneous coronary intervention; CABG, coronary artery bypass graft; COPD, chronic obstructive pulmonary disease; NSTEMI, non-ST-segment elevation myocardial infarction; STEMI, ST-segment elevation myocardial infarction; LVEF, left ventricular ejection fraction; ACEI, angiotensin converting enzyme inhibitor; ARB, angiotensin II receptor blocker; HR, hazard ratio; CI, confidence interval.

**Supplemental Table 4. Discrimination of 30-day prognostic nomogram in subgroups of patients**

| Subgroup        | Sample size | C statistic (95% CI) |
|-----------------|-------------|----------------------|
| Age, yrs        |             |                      |
| ≤75             | 4766        | 0.74 (0.65-0.84)     |
| >75             | 935         | 0.83 (0.71-0.94)     |
| Sex             |             |                      |
| Male            | 4359        | 0.79 (0.69-0.88)     |
| Female          | 1342        | 0.75 (0.62-0.88)     |
| Diabetes        |             |                      |
| Yes             | 1106        | 0.81 (0.62-1.00)     |
| No              | 4431        | 0.78 (0.70-0.87)     |
| Diagnosis       |             |                      |
| STEMI           | 4302        | 0.77 (0.68-0.86)     |
| NSTEMI          | 1399        | 0.83 (0.72-0.93)     |
| In-hospital PCI |             |                      |
| Yes             | 3498        | 0.76 (0.63-0.88)     |
| No              | 2203        | 0.76 (0.66-0.85)     |

STEMI, ST-segment elevation myocardial infarction; NSTEMI, non-ST-segment elevation myocardial infarction; PCI, percutaneous coronary intervention; CI, confidence interval.

**Supplemental Table 5. Discrimination of 2-year prognostic nomogram in subgroups of patients**

| Subgroup           | Sample size | C statistic (95% CI) |
|--------------------|-------------|----------------------|
| Age, yrs           |             |                      |
| ≤75                | 3766        | 0.79 (0.75-0.83)     |
| >75                | 695         | 0.66 (0.62-0.71)     |
| Sex                |             |                      |
| Male               | 3412        | 0.83 (0.80-0.86)     |
| Female             | 1049        | 0.75 (0.70-0.80)     |
| Diabetes           |             |                      |
| Yes                | 845         | 0.81 (0.76-0.86)     |
| No                 | 3496        | 0.81 (0.78-0.84)     |
| AMI classification |             |                      |
| STEMI              | 3364        | 0.81 (0.78-0.84)     |
| NSTEMI             | 1097        | 0.81 (0.76-0.85)     |
| In-hospital PCI    |             |                      |
| Yes                | 3104        | 0.82 (0.78-0.87)     |
| No                 | 1357        | 0.72 (0.68-0.76)     |

AMI, acute myocardial infarction; STEMI, ST-segment elevation myocardial infarction; NSTEMI, non-ST-segment elevation myocardial infarction; PCI, percutaneous coronary intervention; CI, confidence interval.

## II. Supplemental Figures.

### Supplemental Figure 1. Flowchart of this study

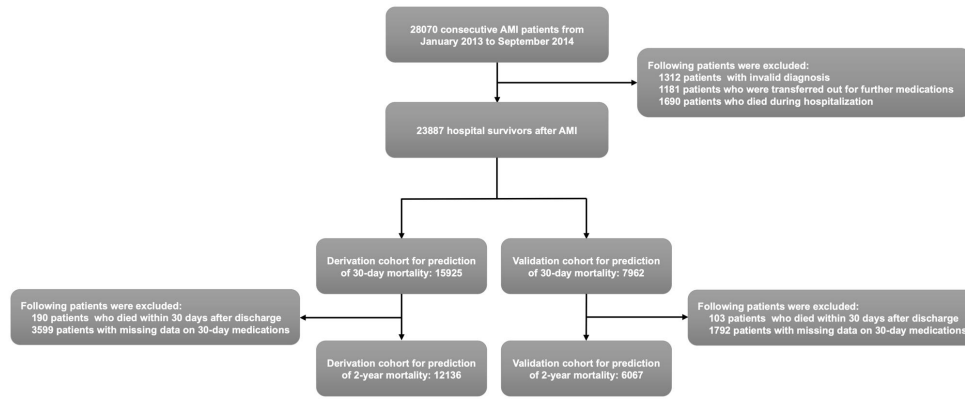

review only

**Supplemental Figure 2. Kaplan-Meier curve for patients after AMI hospitalization**

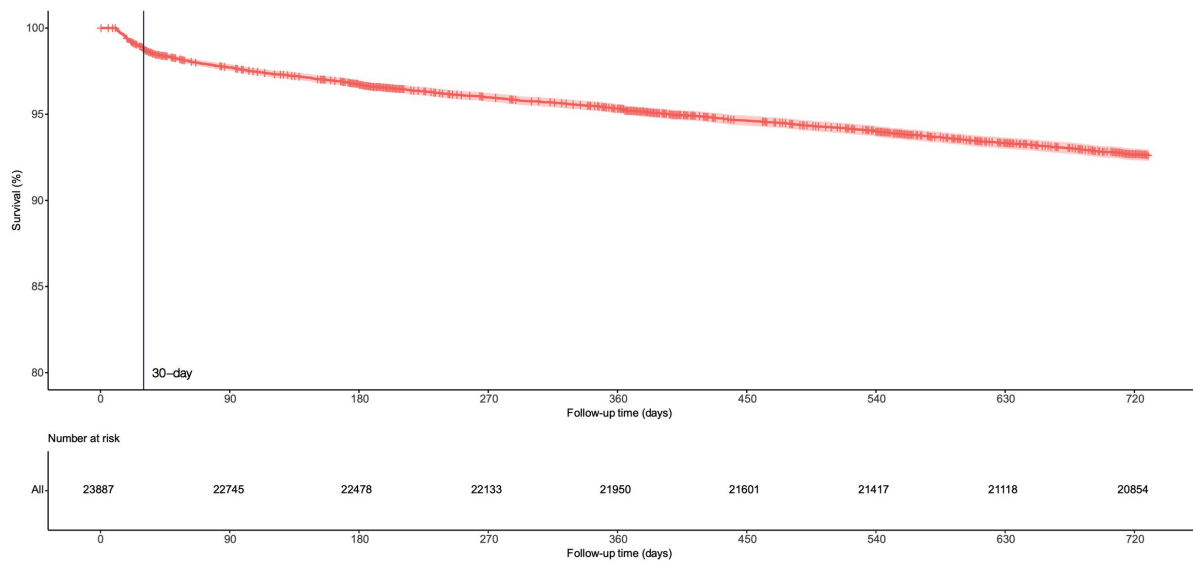

Peer review only

**Supplemental Figure 3. Density plots for all-cause death and recurrent myocardial infarction during follow-up**

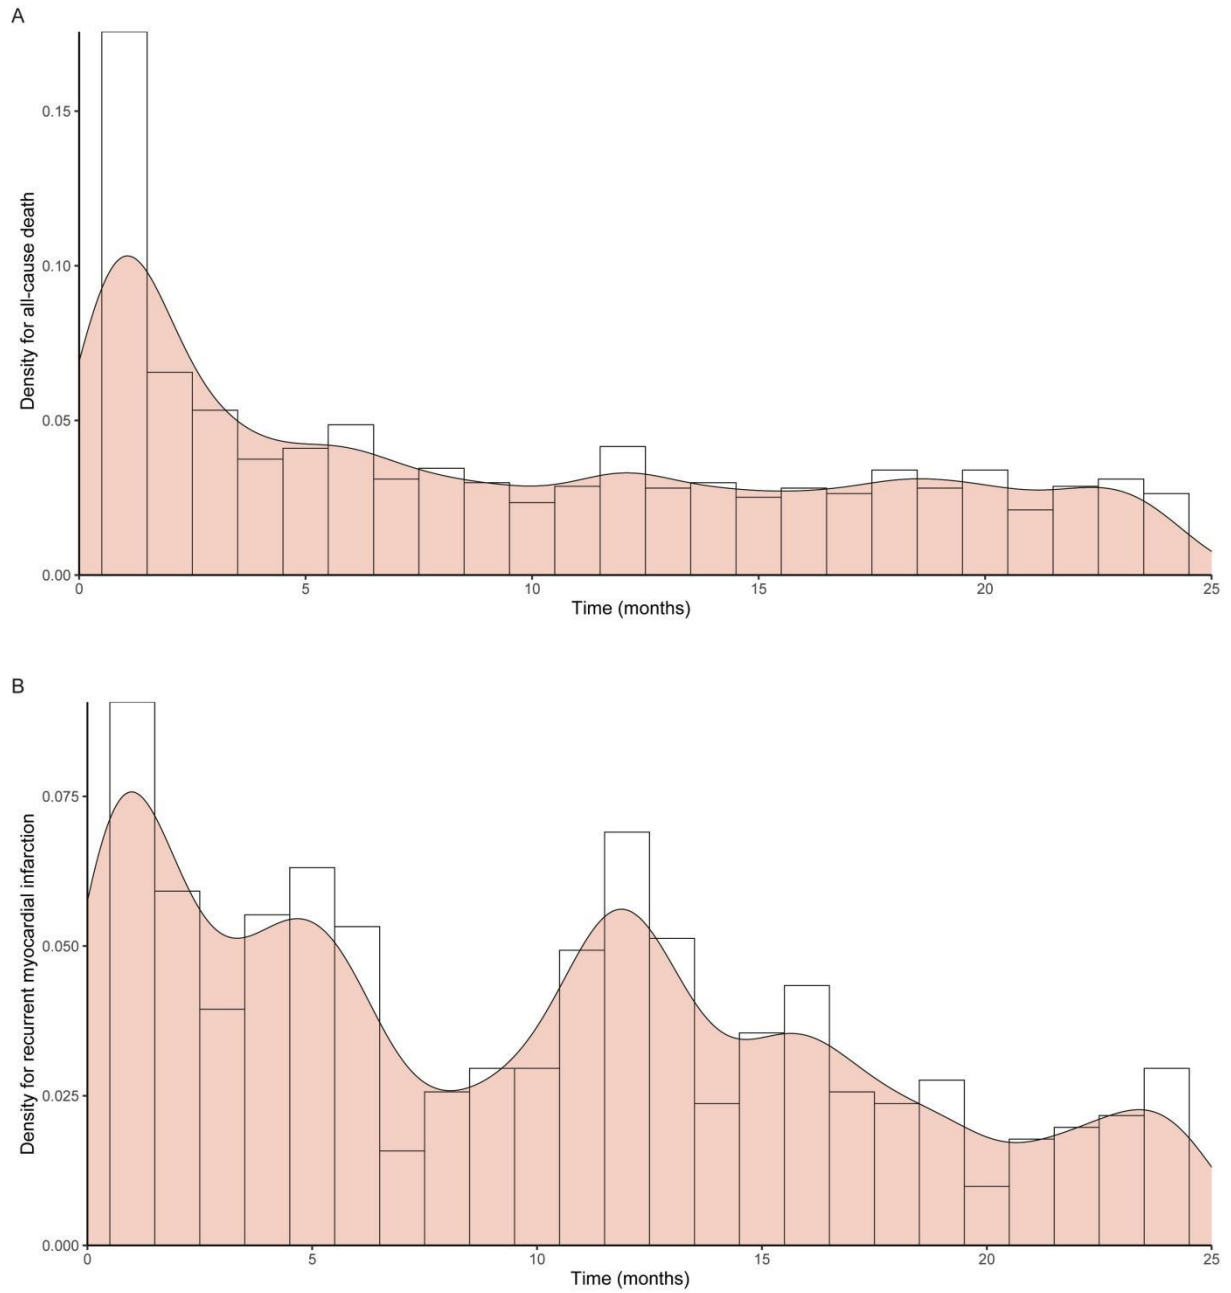

**Supplemental Figure 4. Variable selection by LASSO method for 30-day prognostic model in imputation dataset 1**

A

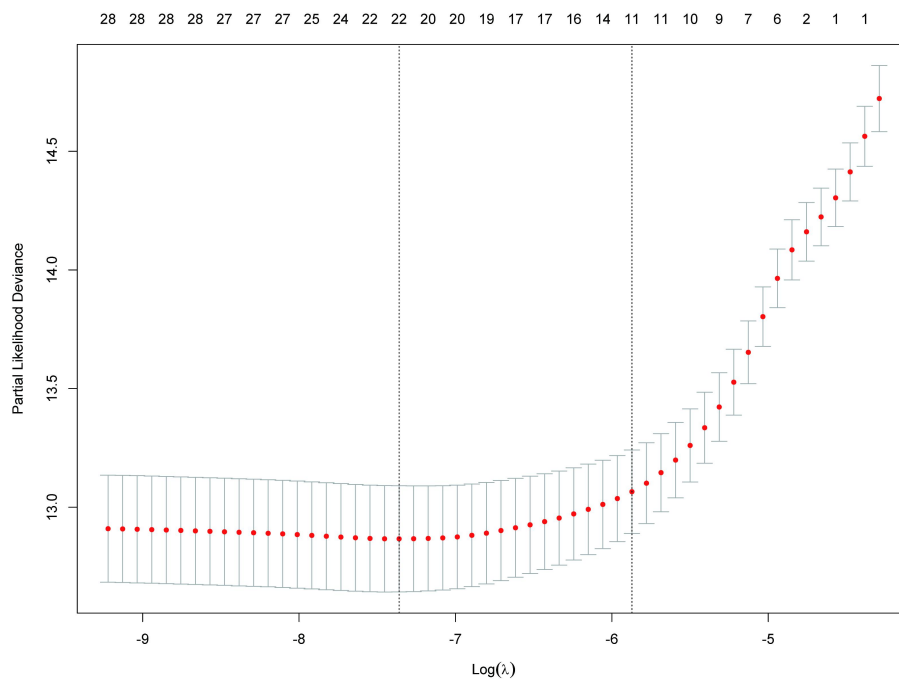

B

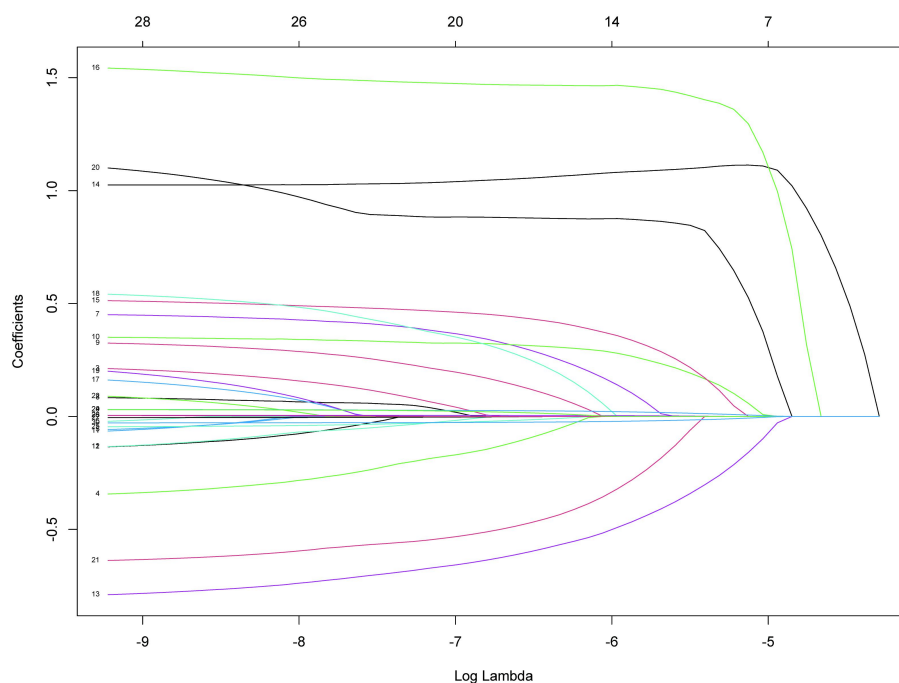



### Supplemental Figure 5. Variable selection by LASSO method for 30-day prognostic model in imputation dataset 2

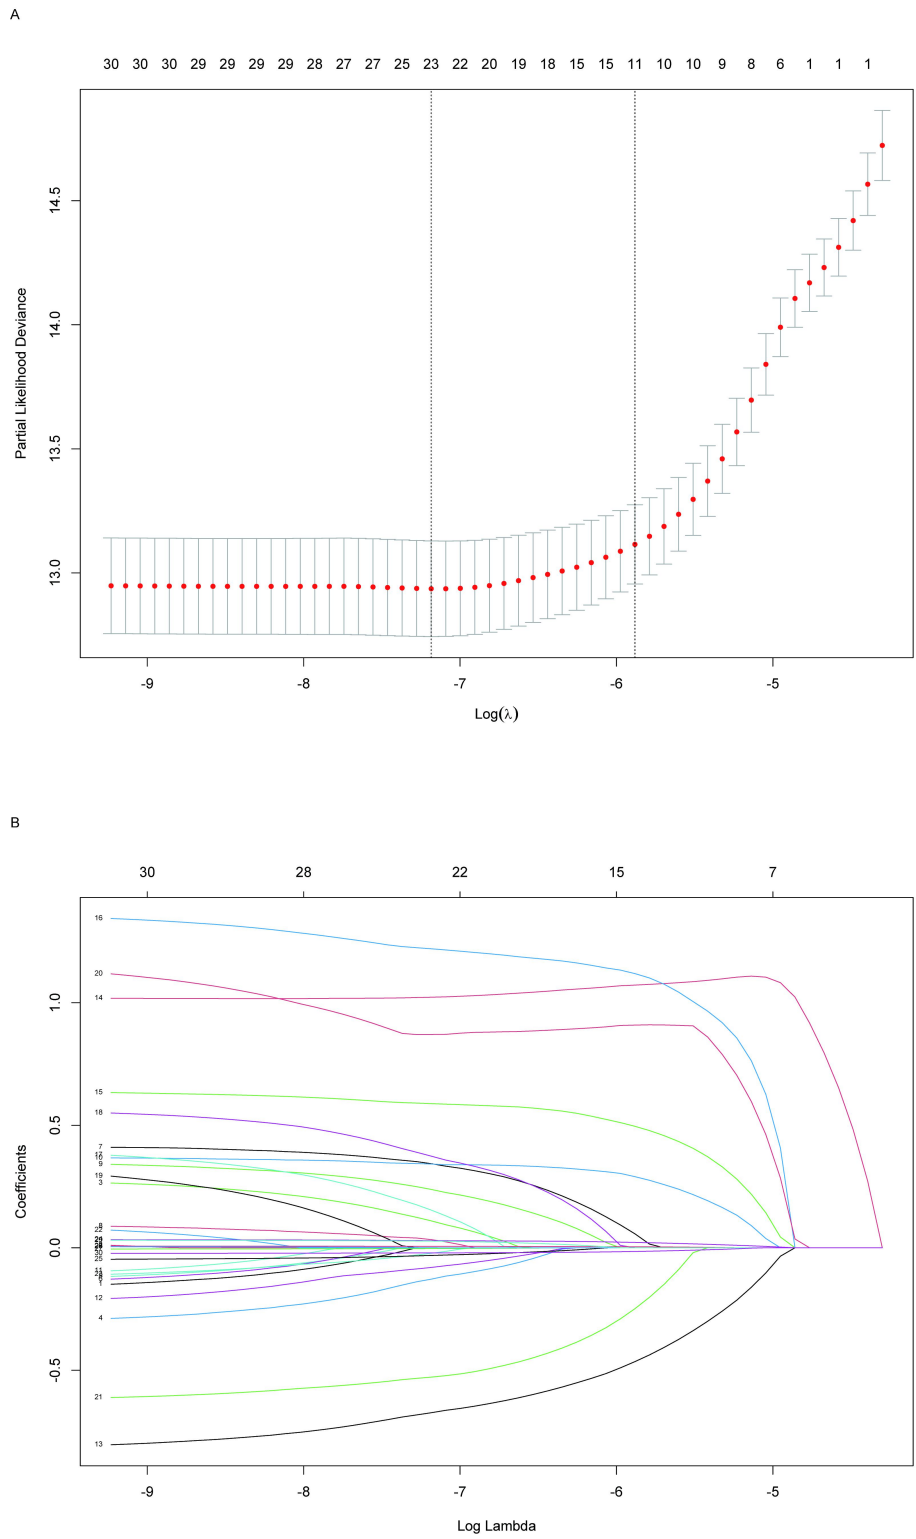

**Supplemental Figure 6. Variable selection by LASSO method for 30-day prognostic model in imputation dataset 3**

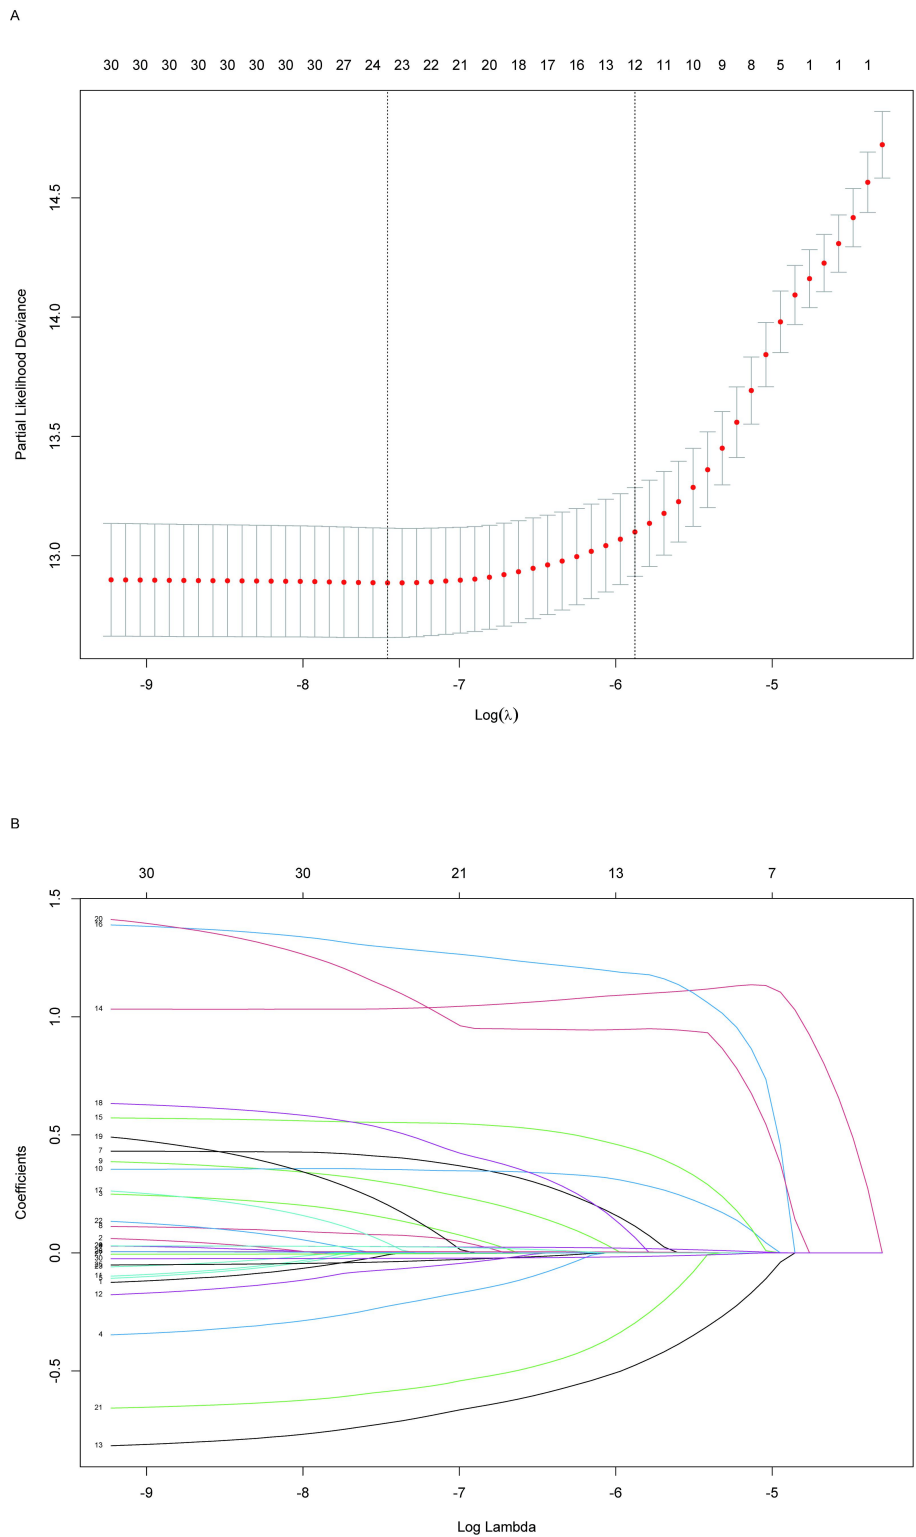

### Supplemental Figure 7. Variable selection by LASSO method for 30-day prognostic model in imputation dataset 4

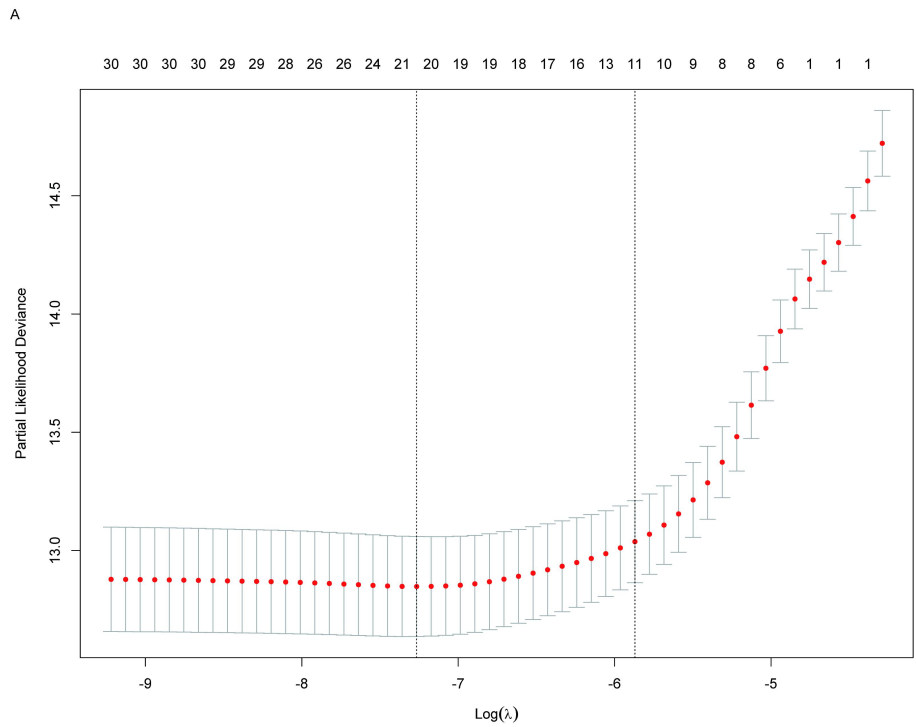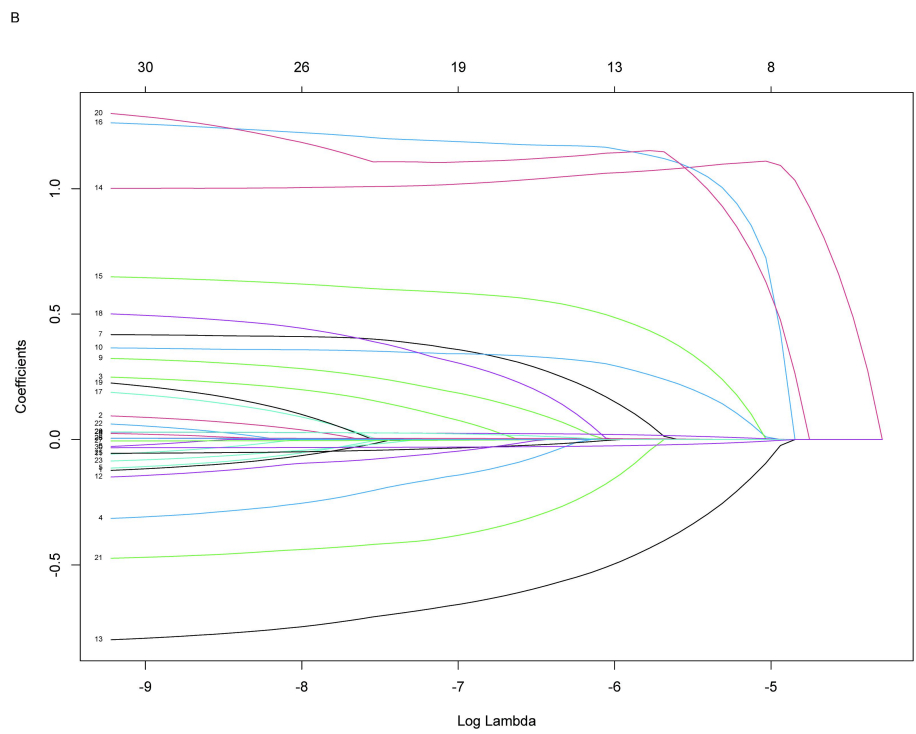

**Supplemental Figure 8. Variable selection by LASSO method for 30-day prognostic model in imputation dataset 5**

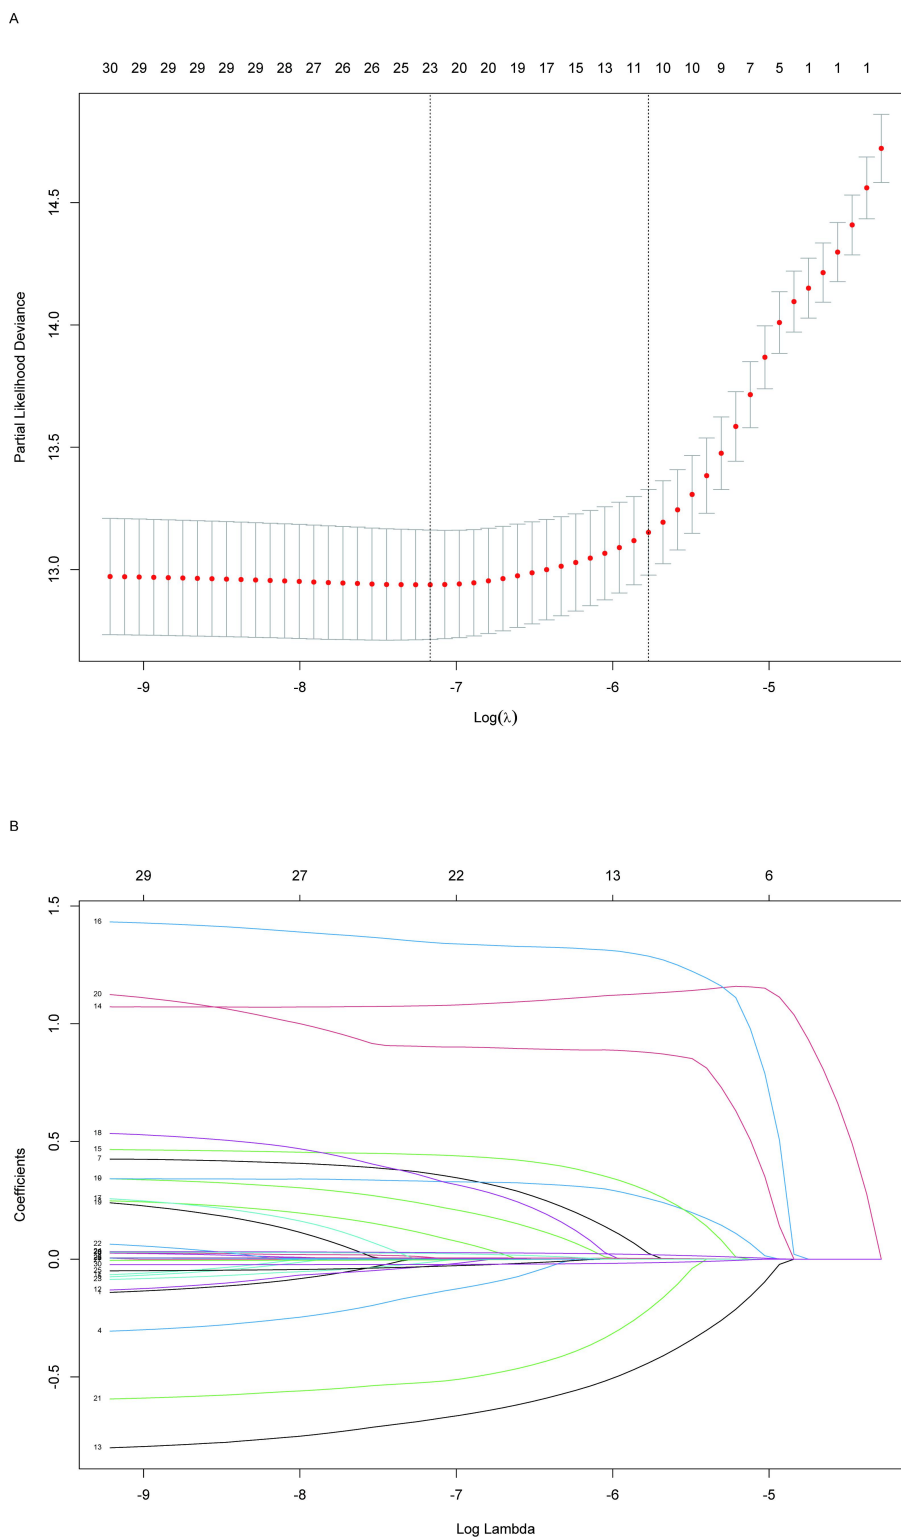

1  
2  
3 **Supplemental Figure 9. Relative importance of selected predictors for 30-day mortality**  
4  
5  
6  
7  
8  
9

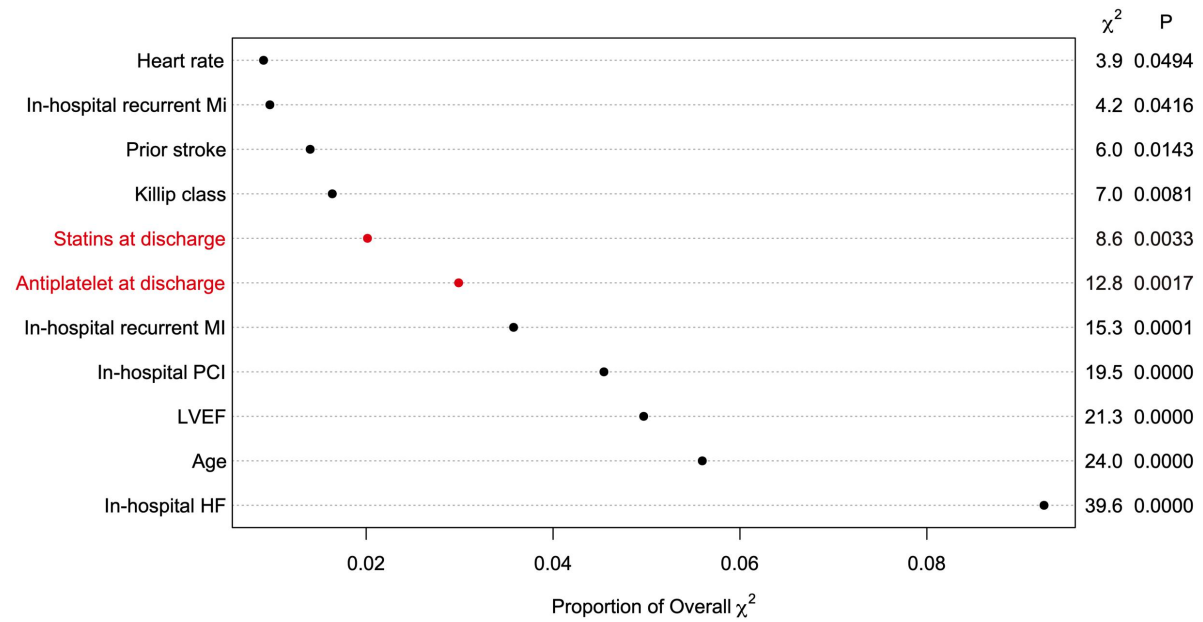

Supplemental Figure 10. Variable selection by LASSO method for 2-year prognostic model in imputation dataset 1

A

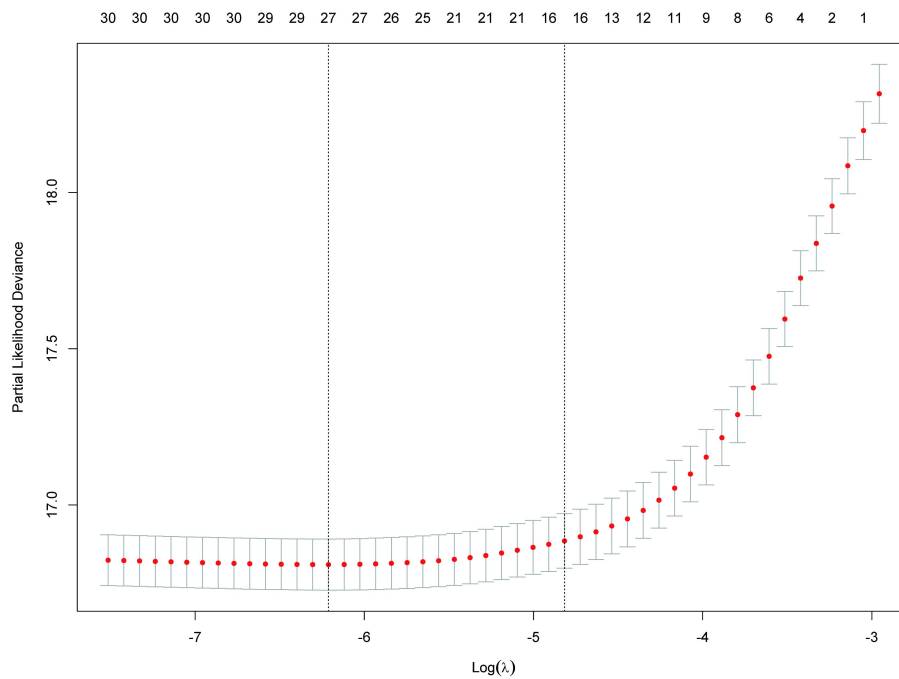

B

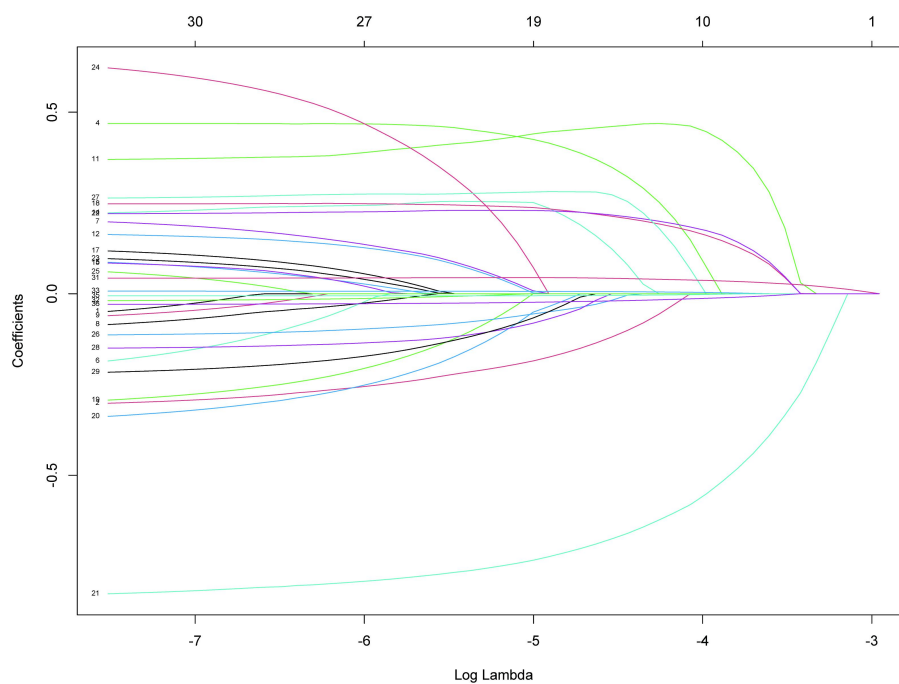

### Supplemental Figure 11. Variable selection by LASSO method for 2-year prognostic model in imputation dataset 2

A

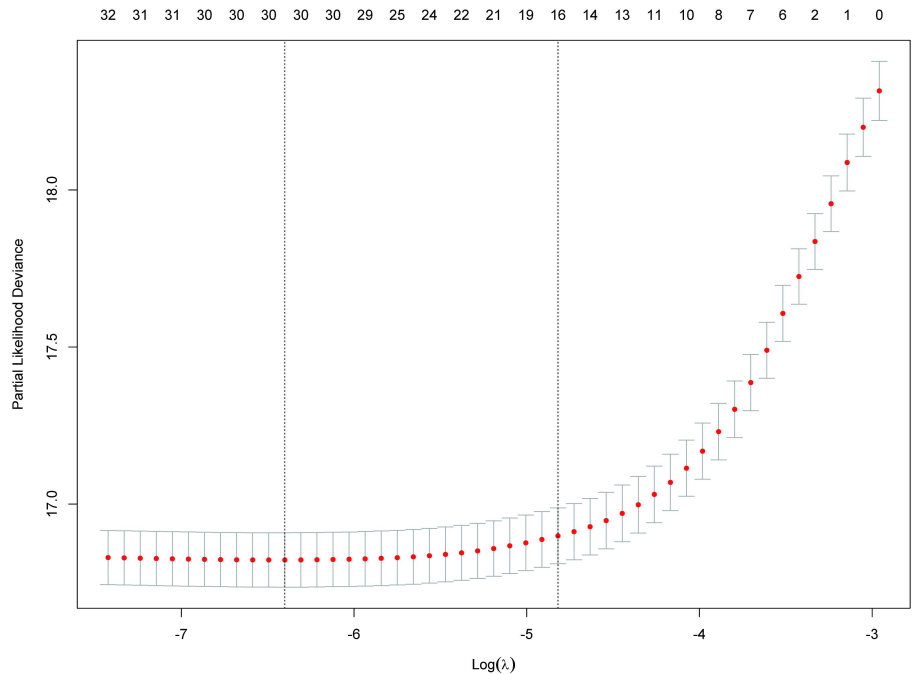

B

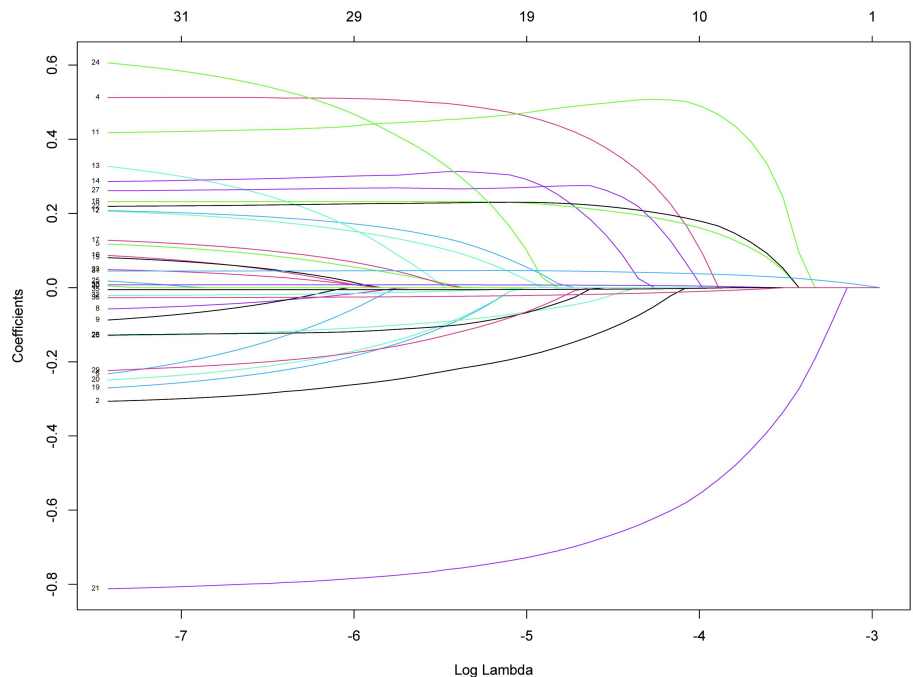

**Supplemental Figure 12. Variable selection by LASSO method for 2-year prognostic model in imputation dataset 3**

A

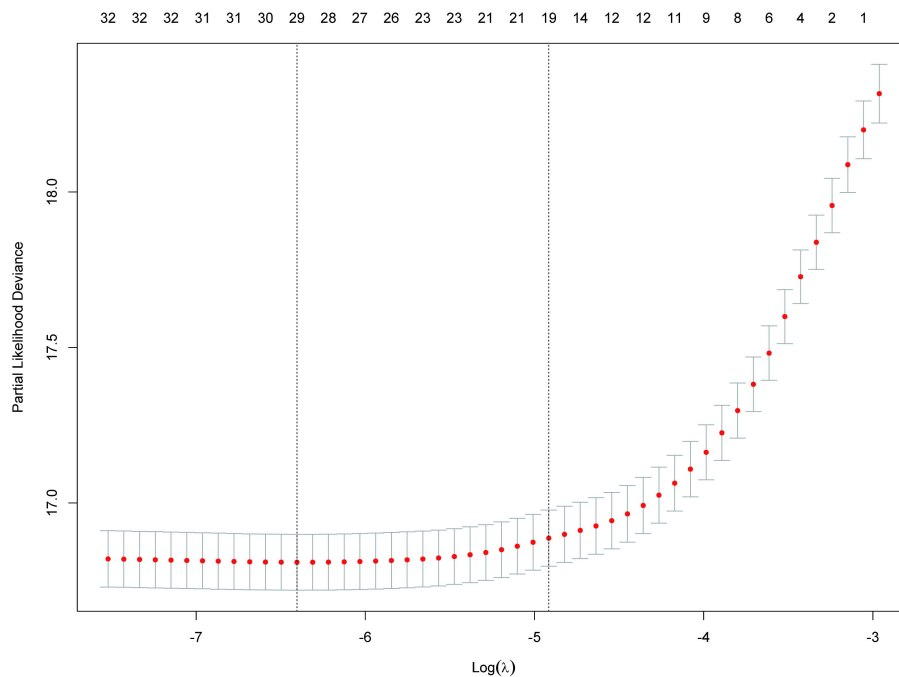

B

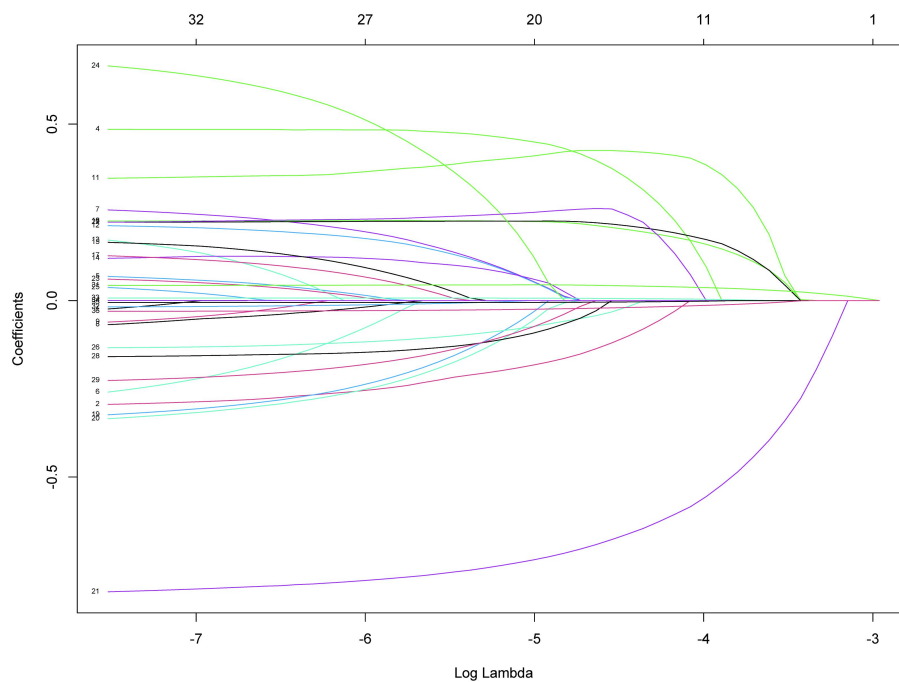



Supplemental Figure 13. Variable selection by LASSO method for 2-year prognostic model in imputation dataset 4

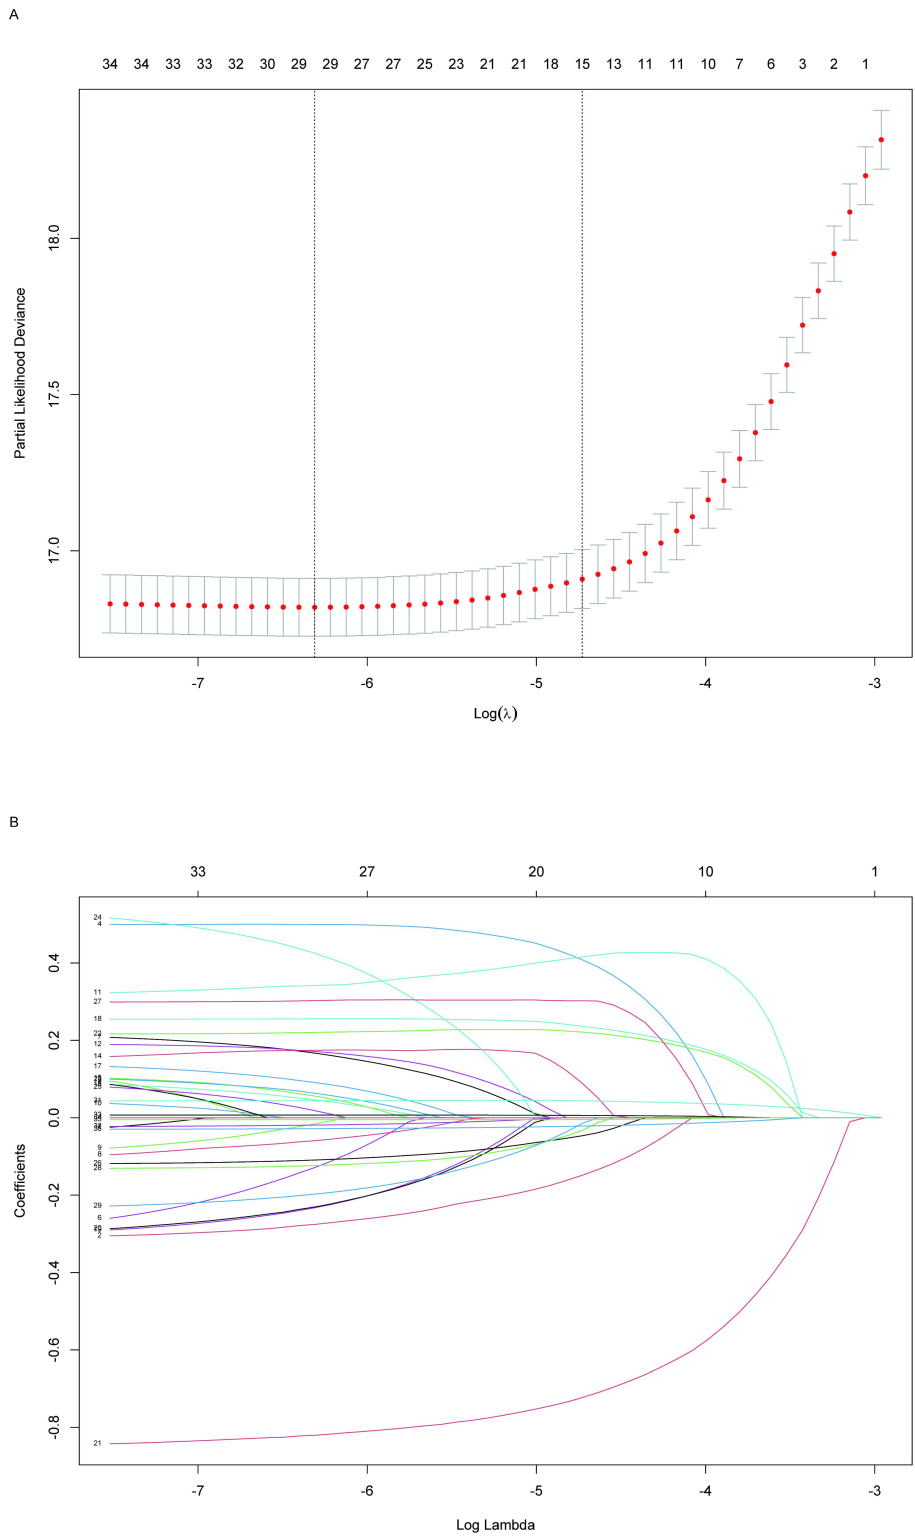

Supplemental Figure 14. Variable selection by LASSO method for 2-year prognostic model in imputation dataset 5

A

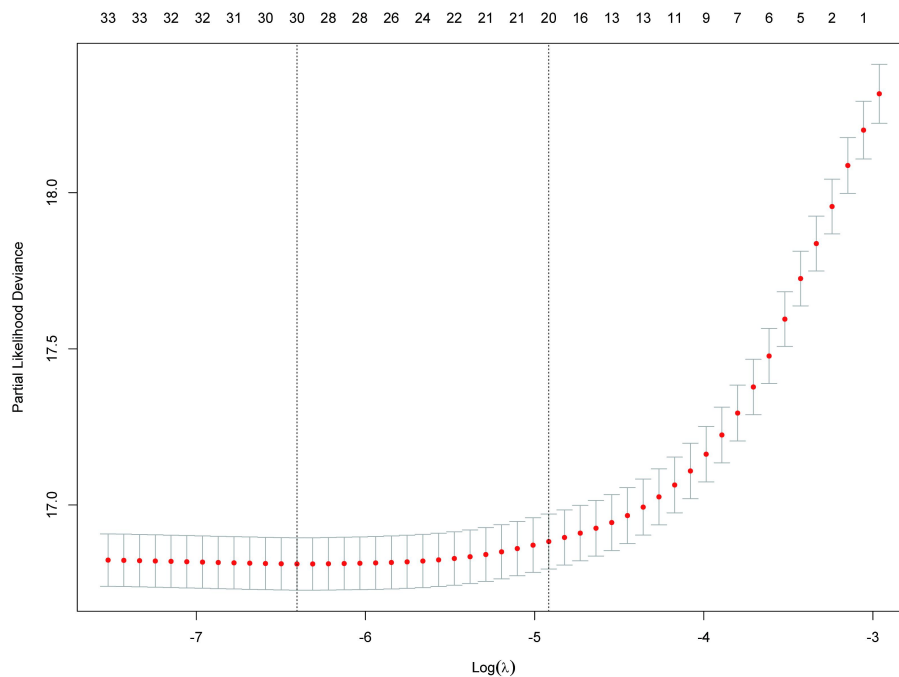

B

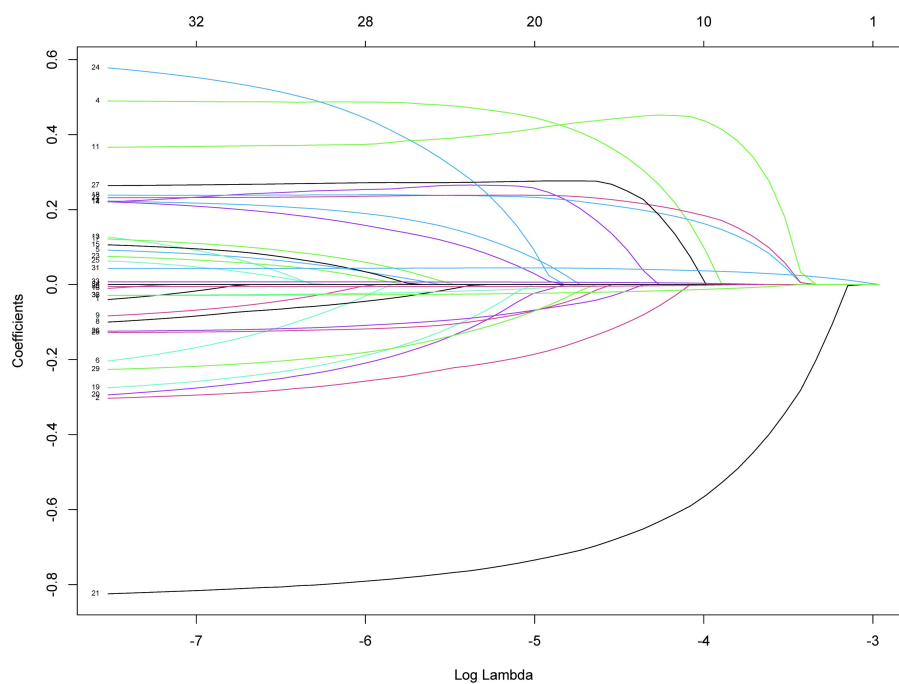

1  
2  
3 **Supplemental Figure 15. Relative importance of selected predictors for 2-year mortality**  
4  
5  
6  
7  
8  
9

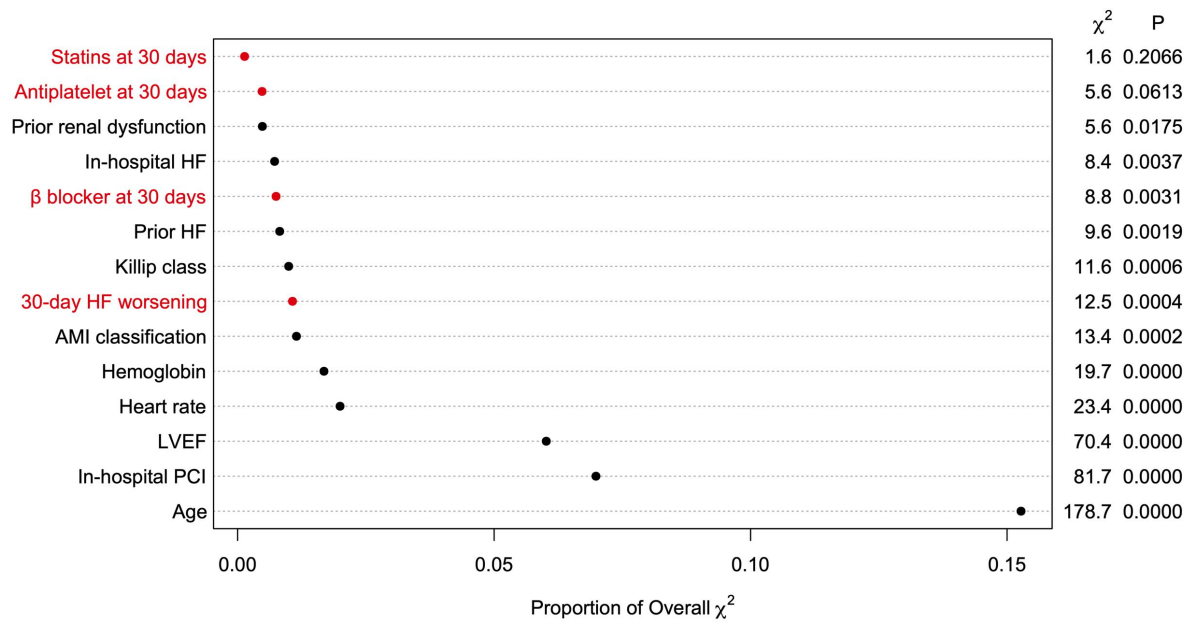

**Supplemental Figure 16. Comparisons of clinical utilities between models with or without adverse events and medications**

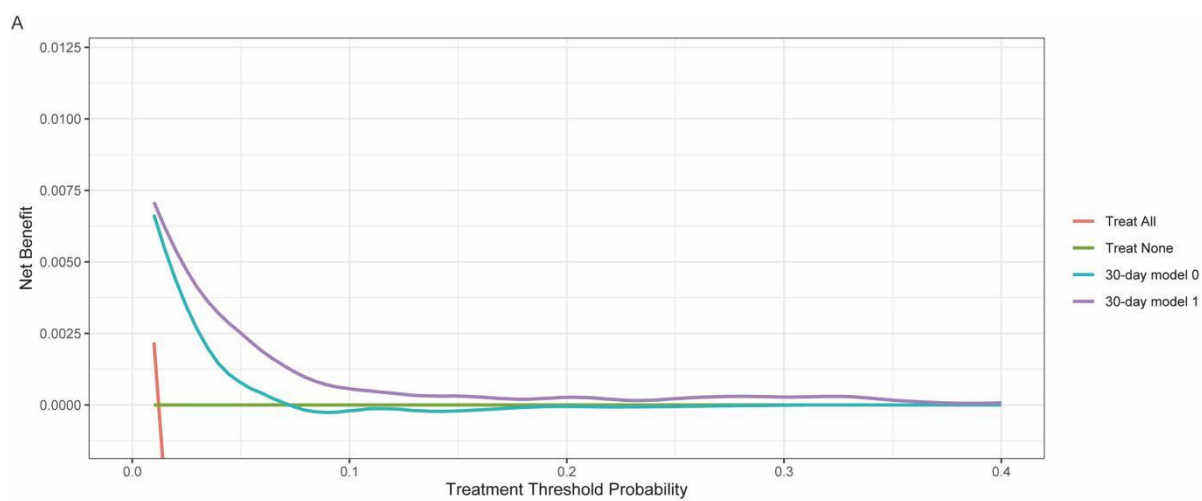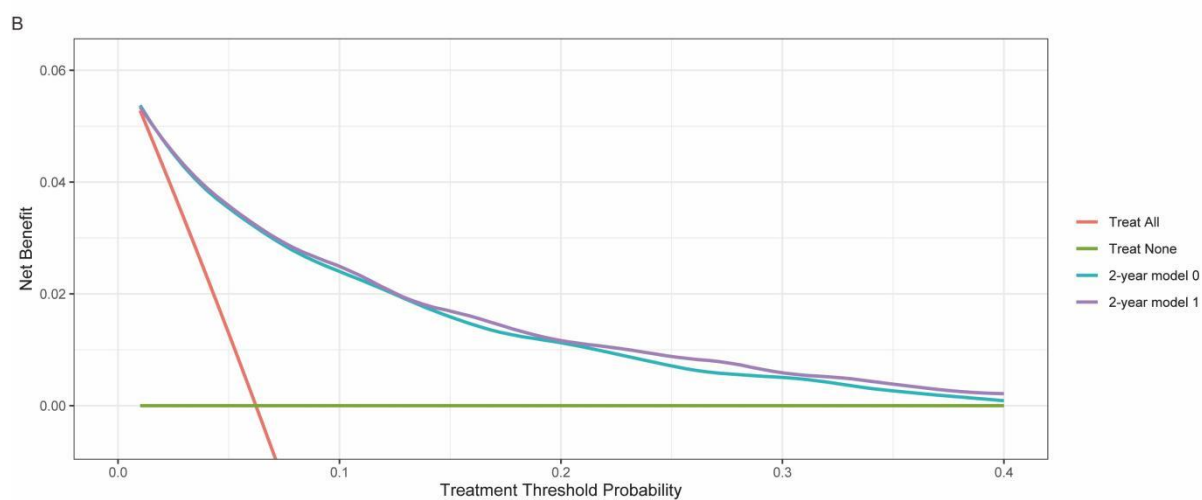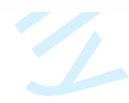

### Supplemental Figure 17. Comparisons of clinical utilities between models and GRACE risk score

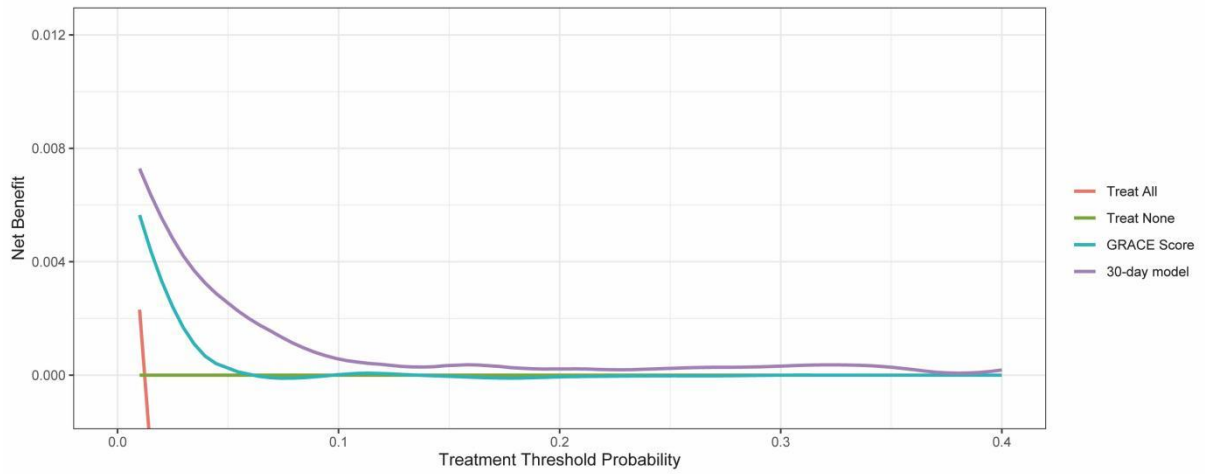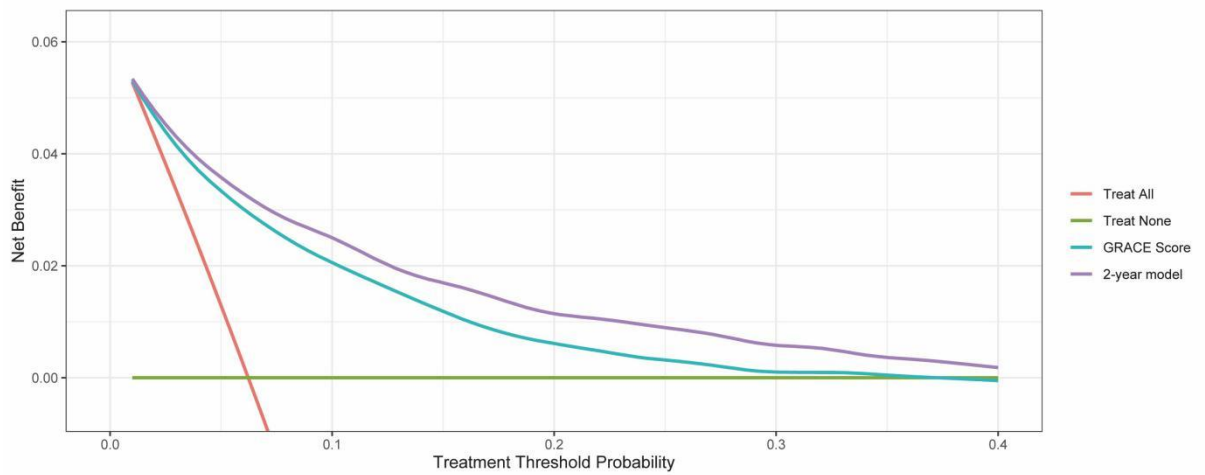

Supplemental Figure 18. Calibration curves of 30-day prognostic nomogram

A

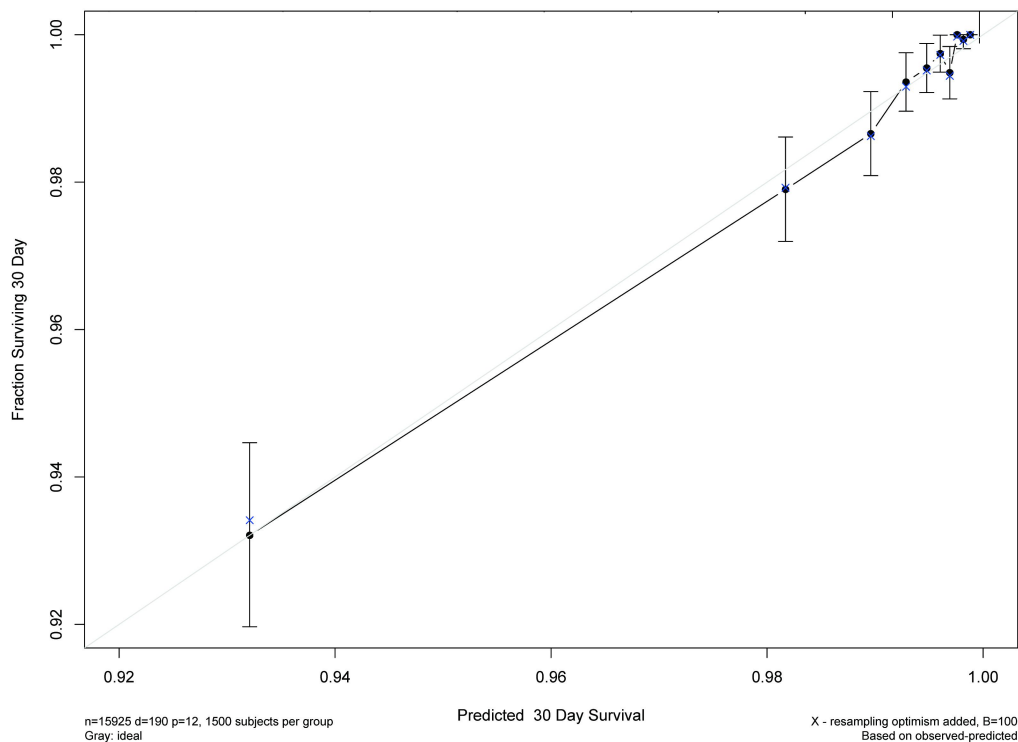

B

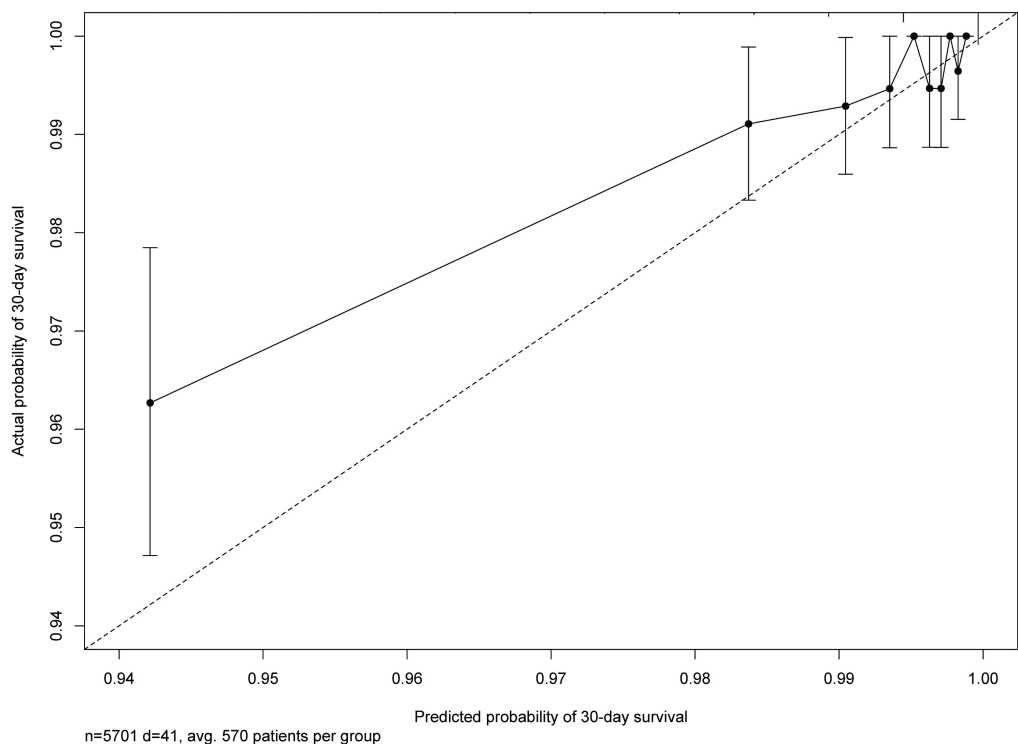

### Supplemental Figure 19. Calibration curves of 2-year prognostic nomogram

A

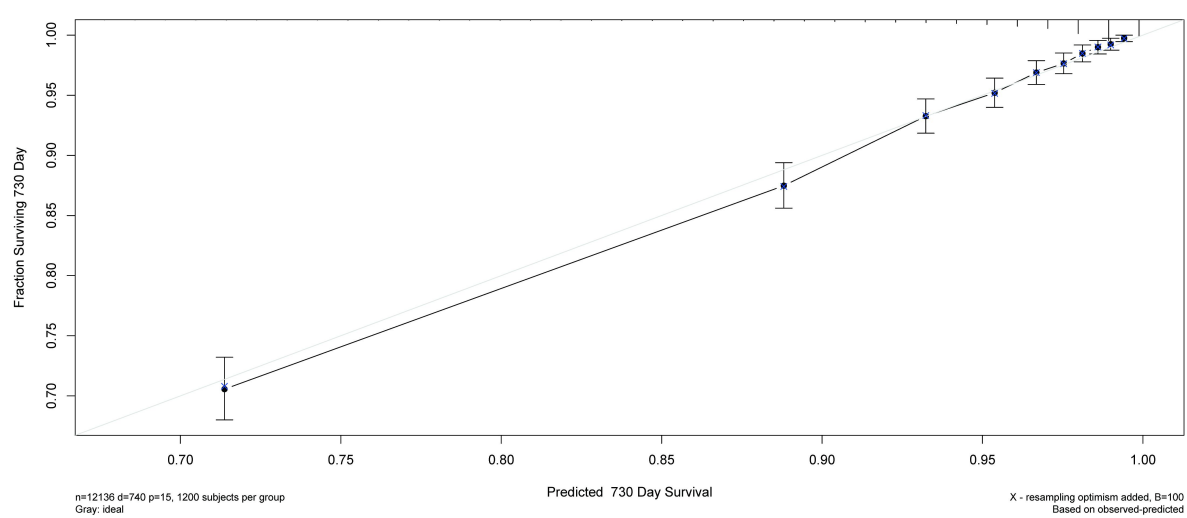

B

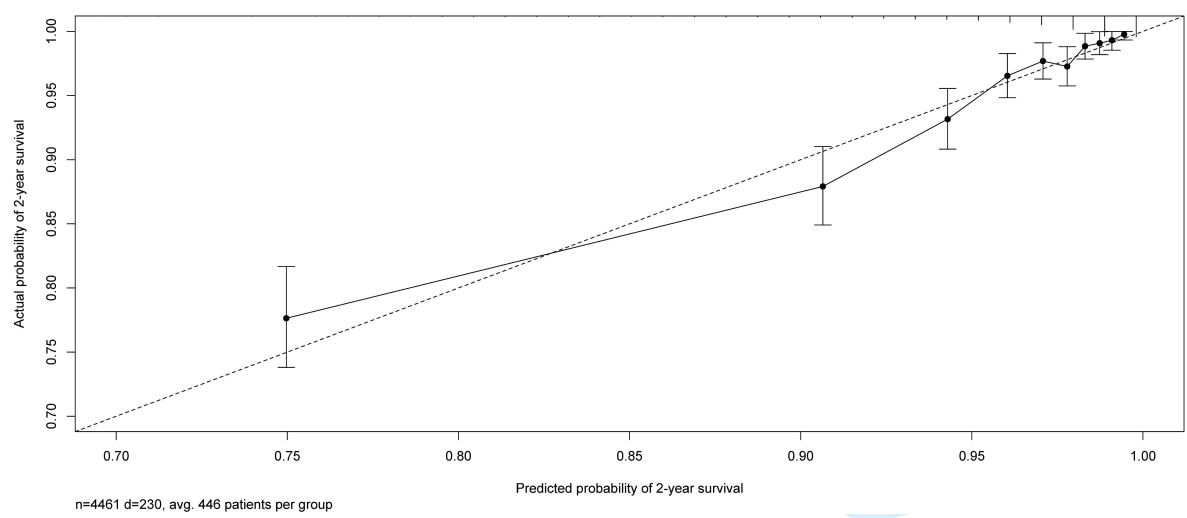

## TRIPOD Checklist: Prediction Model Development

| Section                   | Item | Checklist description                                                                                                                                                                            | Reported on Page Number/Line Number | Reported on Section/Paragraph |
|---------------------------|------|--------------------------------------------------------------------------------------------------------------------------------------------------------------------------------------------------|-------------------------------------|-------------------------------|
| <b>Title and abstract</b> |      |                                                                                                                                                                                                  |                                     |                               |
| Title                     | 1    | Identify the study as developing and/or validating a multivariable prediction model, the target population, and the outcome to be predicted.                                                     |                                     |                               |
| Abstract                  | 2    | Provide a summary of objectives, study design, setting, participants, sample size, predictors, outcome, statistical analysis, results, and conclusions.                                          |                                     |                               |
| <b>Introduction</b>       |      |                                                                                                                                                                                                  |                                     |                               |
| Background and objectives | 3a   | Explain the medical context (including whether diagnostic or prognostic) and rationale for developing or validating the multivariable prediction model, including references to existing models. |                                     |                               |
|                           | 3b   | Specify the objectives, including whether the study describes the development or validation of the model or both.                                                                                |                                     |                               |
| <b>Methods</b>            |      |                                                                                                                                                                                                  |                                     |                               |
| Source of data            | 4a   | Describe the study design or source of data (e.g., randomized trial, cohort, or registry data), separately for the development and validation data sets, if applicable.                          |                                     |                               |
|                           | 4b   | Specify the key study dates, including start of accrual; end of accrual; and, if applicable, end of follow-up.                                                                                   |                                     |                               |
| Participants              | 5a   | Specify key elements of the study setting (e.g., primary care, secondary care, general population) including number and location of centres.                                                     |                                     |                               |
|                           | 5b   | Describe eligibility criteria for participants.                                                                                                                                                  |                                     |                               |
|                           | 5c   | Give details of treatments received, if relevant.                                                                                                                                                |                                     |                               |
| Outcome                   | 6a   | Clearly define the outcome that is predicted by the prediction model, including how and when assessed.                                                                                           |                                     |                               |
|                           | 6b   | Report any actions to blind assessment of the outcome to be predicted.                                                                                                                           |                                     |                               |
| Predictors                | 7a   | Clearly define all predictors used in developing or validating the multivariable prediction model, including how and when they were measured.                                                    |                                     |                               |
|                           | 7b   | Report any actions to blind assessment of predictors for the outcome and other predictors.                                                                                                       |                                     |                               |
| Sample size               | 8    | Explain how the study size was arrived at.                                                                                                                                                       |                                     |                               |



|                              |     |                                                                                                                                                                                                       |  |  |
|------------------------------|-----|-------------------------------------------------------------------------------------------------------------------------------------------------------------------------------------------------------|--|--|
| Missing data                 | 9   | Describe how missing data were handled (e.g., complete-case analysis, single imputation, multiple imputation) with details of any imputation method.                                                  |  |  |
| Statistical analysis methods | 10a | Describe how predictors were handled in the analyses.                                                                                                                                                 |  |  |
|                              | 10b | Specify type of model, all model-building procedures (including any predictor selection), and method for internal validation.                                                                         |  |  |
|                              | 10d | Specify all measures used to assess model performance and, if relevant, to compare multiple models.                                                                                                   |  |  |
| Risk groups                  | 11  | Provide details on how risk groups were created, if done.                                                                                                                                             |  |  |
| <b>Results</b>               |     |                                                                                                                                                                                                       |  |  |
| Participants                 | 13a | Describe the flow of participants through the study, including the number of participants with and without the outcome and, if applicable, a summary of the follow-up time. A diagram may be helpful. |  |  |
|                              | 13b | Describe the characteristics of the participants (basic demographics, clinical features, available predictors), including the number of participants with missing data for predictors and outcome.    |  |  |
| Model development            | 14a | Specify the number of participants and outcome events in each analysis.                                                                                                                               |  |  |
|                              | 14b | If done, report the unadjusted association between each candidate predictor and outcome.                                                                                                              |  |  |
| Model specification          | 15a | Present the full prediction model to allow predictions for individuals (i.e., all regression coefficients, and model intercept or baseline survival at a given time point).                           |  |  |
|                              | 15b | Explain how to use the prediction model.                                                                                                                                                              |  |  |
| Model performance            | 16  | Report performance measures (with CIs) for the prediction model.                                                                                                                                      |  |  |
| <b>Discussion</b>            |     |                                                                                                                                                                                                       |  |  |
| Limitations                  | 18  | Discuss any limitations of the study (such as nonrepresentative sample, few events per predictor, missing data).                                                                                      |  |  |
| Interpretation               | 19b | Give an overall interpretation of the results, considering objectives, limitations, and results from similar studies, and other relevant evidence.                                                    |  |  |
| Implications                 | 20  | Discuss the potential clinical use of the model and implications for future research.                                                                                                                 |  |  |
| <b>Other information</b>     |     |                                                                                                                                                                                                       |  |  |
| Supplementary information    | 21  | Provide information about the availability of supplementary resources, such as study protocol, Web calculator, and data sets.                                                                         |  |  |
| Funding                      | 22  | Give the source of funding and the role of the funders for the present study.                                                                                                                         |  |  |

1  
2  
3  
4  
5  
6  
7  
8  
9  
10  
11  
12  
13  
14  
15  
16  
17  
18  
19  
20  
21  
22  
23  
24  
25  
26  
27  
28  
29  
30  
31  
32  
33  
34  
35  
36  
37  
38  
39  
40  
41  
42  
43  
44  
45  
46

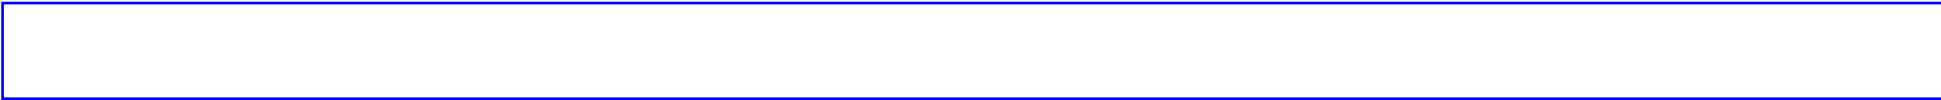

For peer review only

# BMJ Open

## Development and validation of dynamic models to predict post-discharge mortality risk in patients with acute myocardial infarction: results from China Acute Myocardial Infarction registry

|                                 |                                                                                                                                                                                                                                                                                                                                                                                                                                                                                                                                                                                                                                                                                                                                                                                                                                                                                                                                                                                                                                                                                                                                                                                                                                                                                                                                                                                                                                                                                                                                                                                                                                                                                                                                                                                                                                                                                                                                                                           |
|---------------------------------|---------------------------------------------------------------------------------------------------------------------------------------------------------------------------------------------------------------------------------------------------------------------------------------------------------------------------------------------------------------------------------------------------------------------------------------------------------------------------------------------------------------------------------------------------------------------------------------------------------------------------------------------------------------------------------------------------------------------------------------------------------------------------------------------------------------------------------------------------------------------------------------------------------------------------------------------------------------------------------------------------------------------------------------------------------------------------------------------------------------------------------------------------------------------------------------------------------------------------------------------------------------------------------------------------------------------------------------------------------------------------------------------------------------------------------------------------------------------------------------------------------------------------------------------------------------------------------------------------------------------------------------------------------------------------------------------------------------------------------------------------------------------------------------------------------------------------------------------------------------------------------------------------------------------------------------------------------------------------|
| Journal:                        | <i>BMJ Open</i>                                                                                                                                                                                                                                                                                                                                                                                                                                                                                                                                                                                                                                                                                                                                                                                                                                                                                                                                                                                                                                                                                                                                                                                                                                                                                                                                                                                                                                                                                                                                                                                                                                                                                                                                                                                                                                                                                                                                                           |
| Manuscript ID                   | bmjopen-2022-069505.R1                                                                                                                                                                                                                                                                                                                                                                                                                                                                                                                                                                                                                                                                                                                                                                                                                                                                                                                                                                                                                                                                                                                                                                                                                                                                                                                                                                                                                                                                                                                                                                                                                                                                                                                                                                                                                                                                                                                                                    |
| Article Type:                   | Original research                                                                                                                                                                                                                                                                                                                                                                                                                                                                                                                                                                                                                                                                                                                                                                                                                                                                                                                                                                                                                                                                                                                                                                                                                                                                                                                                                                                                                                                                                                                                                                                                                                                                                                                                                                                                                                                                                                                                                         |
| Date Submitted by the Author:   | 16-Feb-2023                                                                                                                                                                                                                                                                                                                                                                                                                                                                                                                                                                                                                                                                                                                                                                                                                                                                                                                                                                                                                                                                                                                                                                                                                                                                                                                                                                                                                                                                                                                                                                                                                                                                                                                                                                                                                                                                                                                                                               |
| Complete List of Authors:       | <p>Lv, Junxing; Chinese Academy of Medical Sciences &amp; Peking Union Medical College Fuwai Hospital, Cardiology</p> <p>Wang, Chuang-Shi; Chinese Academy of Medical Sciences &amp; Peking Union Medical College Fuwai Hospital, Medical Research and Biometrics Center, National Center for Cardiovascular Diseases, Fuwai Hospital, Chinese Academy of Medical Sciences and Peking Union Medical College, Beijing 102300, China.</p> <p>Gao, Xiaojin; Chinese Academy of Medical Sciences &amp; Peking Union Medical College Fuwai Hospital, Cardiology</p> <p>Yang, Jingang; Chinese Academy of Medical Sciences &amp; Peking Union Medical College Fuwai Hospital, Cardiology</p> <p>Zhang, Xuan; Chinese Academy of Medical Sciences &amp; Peking Union Medical College Fuwai Hospital, Cardiology</p> <p>Ye, Yunqing; Chinese Academy of Medical Sciences &amp; Peking Union Medical College Fuwai Hospital, Department of Cardiology</p> <p>Dong, Qiuting; Chinese Academy of Medical Sciences &amp; Peking Union Medical College Fuwai Hospital, Department of Cardiology</p> <p>Fu, Rui; Chinese Academy of Medical Sciences and Peking Union Medical College Fuwai Hospital, Cardiology</p> <p>sun, hui; Chinese Academy of Medical Sciences &amp; Peking Union Medical College Fuwai Hospital, Cardiology</p> <p>Yan, Xinxin; Chinese Academy of Medical Sciences &amp; Peking Union Medical College Fuwai Hospital, Department of Cardiology</p> <p>Zhao, Yanyan; Chinese Academy of Medical Sciences &amp; Peking Union Medical College Fuwai Hospital, Medical Research &amp; Biometrics Center</p> <p>Yang, Wang; Chinese Academy of Medical Sciences &amp; Peking Union Medical College Fuwai Hospital</p> <p>Xu, Haiyan; Chinese Academy of Medical Sciences &amp; Peking Union Medical College Fuwai Hospital, Department of Cardiology</p> <p>Yang, Yuejin; Chinese Academy of Medical Sciences &amp; Peking Union Medical College Fuwai Hospital</p> |
| <b>Primary Subject Heading</b>: | Cardiovascular medicine                                                                                                                                                                                                                                                                                                                                                                                                                                                                                                                                                                                                                                                                                                                                                                                                                                                                                                                                                                                                                                                                                                                                                                                                                                                                                                                                                                                                                                                                                                                                                                                                                                                                                                                                                                                                                                                                                                                                                   |
| Secondary Subject Heading:      | Cardiovascular medicine                                                                                                                                                                                                                                                                                                                                                                                                                                                                                                                                                                                                                                                                                                                                                                                                                                                                                                                                                                                                                                                                                                                                                                                                                                                                                                                                                                                                                                                                                                                                                                                                                                                                                                                                                                                                                                                                                                                                                   |
| Keywords:                       | Myocardial infarction < CARDIOLOGY, Coronary heart disease <                                                                                                                                                                                                                                                                                                                                                                                                                                                                                                                                                                                                                                                                                                                                                                                                                                                                                                                                                                                                                                                                                                                                                                                                                                                                                                                                                                                                                                                                                                                                                                                                                                                                                                                                                                                                                                                                                                              |

1  
2  
3  
4  
5  
6  
7  
8  
9  
10  
11  
12  
13  
14  
15  
16  
17  
18  
19  
20  
21  
22  
23  
24  
25  
26  
27  
28  
29  
30  
31  
32  
33  
34  
35  
36  
37  
38  
39  
40  
41  
42  
43  
44  
45  
46  
47  
48  
49  
50  
51  
52  
53  
54  
55  
56  
57  
58  
59  
60

|  |                                                           |
|--|-----------------------------------------------------------|
|  | CARDIOLOGY, Coronary intervention < CARDIOLOGY, Prognosis |
|  |                                                           |

SCHOLARONE™  
Manuscripts

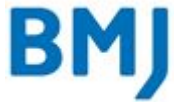

I, the Submitting Author has the right to grant and does grant on behalf of all authors of the Work (as defined in the below author licence), an exclusive licence and/or a non-exclusive licence for contributions from authors who are: i) UK Crown employees; ii) where BMJ has agreed a CC-BY licence shall apply, and/or iii) in accordance with the terms applicable for US Federal Government officers or employees acting as part of their official duties; on a worldwide, perpetual, irrevocable, royalty-free basis to BMJ Publishing Group Ltd ("BMJ") its licensees and where the relevant Journal is co-owned by BMJ to the co-owners of the Journal, to publish the Work in this journal and any other BMJ products and to exploit all rights, as set out in our [licence](#).

The Submitting Author accepts and understands that any supply made under these terms is made by BMJ to the Submitting Author unless you are acting as an employee on behalf of your employer or a postgraduate student of an affiliated institution which is paying any applicable article publishing charge ("APC") for Open Access articles. Where the Submitting Author wishes to make the Work available on an Open Access basis (and intends to pay the relevant APC), the terms of reuse of such Open Access shall be governed by a Creative Commons licence – details of these licences and which [Creative Commons](#) licence will apply to this Work are set out in our licence referred to above.

Other than as permitted in any relevant BMJ Author's Self Archiving Policies, I confirm this Work has not been accepted for publication elsewhere, is not being considered for publication elsewhere and does not duplicate material already published. I confirm all authors consent to publication of this Work and authorise the granting of this licence.

1  
2  
3 1 **Development and validation of dynamic models to predict post-discharge**  
4  
5  
6 2 **mortality risk in patients with acute myocardial infarction: results from**  
7  
8  
9 3 **China Acute Myocardial Infarction registry**

10  
11  
12 4 **Running title:** Dynamic models in patients with AMI  
13  
14  
15 5

16  
17  
18 6 Junxing Lv, MD<sup>1,\*</sup>, Chuangshi Wang, PhD<sup>2,\*</sup>, Xiaojin Gao, MD, PhD<sup>1</sup>, Jingang Yang, MD,  
19  
20 7 PhD<sup>1</sup>, Xuan Zhang, MD<sup>1</sup>, Yunqing Ye, MD<sup>1</sup>, Qiuting Dong, MD, PhD<sup>1</sup>, Rui Fu, MD<sup>1</sup>, Hui Sun,  
21  
22 8 MD<sup>1</sup>, Xinxin Yan, MD, PhD<sup>1</sup>, Yanyan Zhao, PhD<sup>2</sup>, Yang Wang, PhD<sup>2</sup>, Haiyan Xu, MD, PhD<sup>1,†</sup>,  
23  
24  
25 9 and Yuejin Yang, MD, PhD<sup>1,†</sup>; on behalf of the China Acute Myocardial Infarction Registry  
26  
27  
28 10 study group  
29  
30  
31 11

32  
33  
34 12 <sup>1</sup> Department of Cardiology, Fuwai Hospital, National Center for Cardiovascular Diseases,  
35  
36 13 Chinese Academy of Medical Sciences and Peking Union Medical College, Beijing, China

37  
38 14 <sup>2</sup> Medical Research & Biometrics Center, Fuwai Hospital, National Center for Cardiovascular  
39  
40  
41 15 Diseases, Chinese Academy of Medical Sciences and Peking Union Medical College, Beijing,  
42  
43 16 China  
44  
45  
46 17

47  
48  
49 18 \* Junxing Lv and Chuangshi Wang contributed equally to this work as joint first authors.

50  
51  
52 19 † Haiyan Xu and Yuejin Yang contributed equally to this work as joint corresponding authors.  
53  
54  
55 20

56  
57  
58 21 **Correspondence:**  
59  
60

1  
2  
3 1 Haiyan Xu  
4  
5

6 2 Address: No. 167 Beilishi Road, Xicheng District, 100037, Beijing, China.  
7  
8

9 3 Tel: +86-10-88396082 Fax: +86-10-88396237  
10  
11

12 4 E-mail: xuhaiyan@fuwaihospital.org  
13  
14

15 5 Yuejin Yang  
16  
17

18 6 Address: No. 167 Beilishi Road, Xicheng District, 100037, Beijing, China.  
19  
20

21 7 E-mail: yangyjfw@126.com  
22  
23

24 8  
25

26  
27 9 **Word count**  
28

29  
30 10 **Abstract: 299 Main text (not including references, tables, and figure legends): 3775**  
31  
32

33 11  
34  
35

36 12  
37  
38

39 13  
40  
41  
42  
43  
44  
45  
46  
47  
48  
49  
50  
51  
52  
53  
54  
55  
56  
57  
58  
59  
60

## Abstract

**Objectives:** The risk of adverse events and prognostic factors are changing in different time phases after acute myocardial infarction (AMI). The incidence of adverse events is considerable in the early period after AMI hospitalization. Therefore, dynamic risk prediction is needed to guide post-discharge management of AMI. This study aimed to develop a dynamic risk prediction instrument for patients following AMI.

**Design:** A retrospective analysis of a prospective cohort.

**Setting:** 108 hospitals in China.

**Participants:** A total of 23887 patients after AMI in the China Acute Myocardial Infarction registry were included in this analysis.

**Primary outcome measures:** All-cause mortality.

**Results:** In multivariable analyses, age, prior stroke, heart rate, Killip class, left ventricular ejection fraction (LVEF), in-hospital percutaneous coronary intervention (PCI), recurrent myocardial ischemia, recurrent myocardial infarction, heart failure (HF) during hospitalization, antiplatelet therapy, and statins at discharge were independently associated with 30-day mortality. Variables related to mortality between 30 days and 2 years included age, prior renal dysfunction, history of HF, AMI classification, heart rate, Killip class, hemoglobin, LVEF, in-hospital PCI, HF during hospitalization, HF worsening within 30 days after discharge, antiplatelet therapy,  $\beta$  blocker, and statins use within 30 days after discharge. The inclusion of adverse events and medications significantly improved the predictive performance of models without these indexes (likelihood ratio test  $P < 0.0001$ ). These two sets of predictors were used to establish dynamic prognostic nomograms for predicting mortality in patients with AMI. The C indexes of 30-day and 2-year prognostic nomograms were 0.85 (95% confidence interval



1  
2  
3 1 [CI]: 0.83-0.88) and 0.83 (95% CI: 0.81-0.84) in derivation cohort, and 0.79 (95% CI: 0.71-  
4  
5 2 0.86) and 0.81 (95% CI: 0.79-0.84) in validation cohort, with satisfying calibration.  
6  
7

8 3 **Conclusions:** We established dynamic risk prediction models incorporating adverse event and  
9  
10 4 medications. The nomograms may be useful instruments to help prospective risk assessment  
11  
12 and management of AMI.  
13 5  
14

15  
16 6 **Trial registration number:** NCT01874691.  
17  
18

19 7  
20  
21  
22 8 **Keywords:** Myocardial infarction, risk prediction, model, prognosis  
23  
24  
25  
26  
27  
28  
29  
30  
31  
32  
33  
34  
35  
36  
37  
38  
39  
40  
41  
42  
43  
44  
45  
46  
47  
48  
49  
50  
51  
52  
53  
54  
55  
56  
57  
58  
59  
60

## Strengths and limitations of this study

- We developed and validated a dynamic risk prediction tool using data from a large, prospective, multicenter registry.
- We analyzed the incremental prognostic value of in-hospital and post-discharge adverse events as well as medications over traditional predictors in patients following acute myocardial infarction.
- We compared the predictive performance of our models with existing risk prediction tools, including the Global Registry of Acute Coronary Events 1.0 and 2.0 scores.
- The predictive performance of the dynamic risk prediction tool can be further improved if including more follow-up information.
- The dynamic risk prediction tool should be further validated in external cohorts.

## 1           2 3           1    **Introduction** 4 5

6           2    Although in-hospital mortality of acute myocardial infarction (AMI) has been decreased in  
7  
8           3    many countries,<sup>[1,2]</sup> risk of adverse events remains considerable in survivors after AMI  
9  
10          4    hospitalization.<sup>[3]</sup> Previous studies have indicated unsatisfying and imbalanced quality of  
11  
12          5    secondary prevention medications in clinical practice,<sup>[4,5]</sup> which can cause negative impact on  
13  
14          6    prognosis of AMI patients. Individualized risk assessment may aid in decision making of long-  
15  
16          7    term therapeutic strategies for patients after AMI. However, the existing risk prediction tools,  
17  
18          8    which are mainly based on predictive indexes collected at admission, fail to consider the  
19  
20          9    changing nature of adverse events and medications after AMI hospitalization,<sup>[6,7]</sup> and therefore  
21  
22          10   may not be appropriate to guide long-term management. Dynamic risk assessment may help  
23  
24          11   improve the quality of long-term management for patients following AMI.  
25  
26  
27  
28  
29

30          12            Although several studies sought to forecast mortality dynamically in patients with acute  
31  
32          13    coronary syndromes,<sup>[8-11]</sup> the prognostic components of these models were obtained during  
33  
34          14    hospitalization, without taking follow-up adverse events and medications into consideration.  
35  
36          15    Dynamic prognostic instruments designed to help risk reassessment should include post-  
37  
38          16    discharge information which is associated with outcomes. In this study, we aimed to develop  
39  
40          17    and validate dynamic risk prediction models, visualized by nomograms, which included in-  
41  
42          18    hospital and post-discharge adverse events and medications, to assist in prognostic evaluation  
43  
44          19    and decision-making of secondary prevention strategies in patients following AMI.  
45  
46  
47  
48  
49  
50

## 51           21    **Methods** 52 53

### 54           22    *Study population* 55 56

57          23    The data for the present study were from the China Acute Myocardial Infarction (CAMI)  
58  
59          24    registry. The design of the CAMI registry has been described and published elsewhere.<sup>[12]</sup>  
60

1  
2  
3 1 Briefly, 108 hospitals from 31 provinces and municipalities throughout Mainland China were  
4  
5 2 included in this prospective, nationwide, multicenter registry. Consecutive patients with AMI  
6  
7 3 were enrolled in the registry and the final diagnosis of patients must meet the third Universal  
8  
9 4 Definition for Myocardial Infarction (2012).<sup>[13]</sup> All types of AMI were eligible for the CAMI  
10  
11 5 registry, except type 4a and type 5. Presenting characteristics, medical history, laboratory  
12  
13 6 results, medications, and clinical outcomes were collected according to the American College  
14  
15 7 of Cardiology/American Heart Association Task Force on clinical data standards and NCDR-  
16  
17 8 ACTION-GWTG element dictionary.  
18  
19  
20  
21

22 9 Patients registered in the CAMI registry from January 2013 to September 2014 were  
23  
24 10 included in this study. Those with invalid diagnosis (n=1312), who were transferred out  
25  
26 11 (n=1181) or died during hospitalization (n=1690) were excluded. The remaining population  
27  
28 12 (n=23887) was divided randomly according to 2:1 ratio into derivation (n=15925) and  
29  
30 13 validation (n=7962) cohorts for developing and validating a 30-day risk prediction model. After  
31  
32 14 further excluding patients who died within 30 days after discharge (n=293) and those with  
33  
34 15 missing data on 30-day medication use (n=5391), the remaining derivation (n=12136) and  
35  
36 16 validation (n=6067) cohorts were used for establishing and testing a 2-year risk prediction  
37  
38 17 model (online supplemental figure 1).  
39  
40  
41  
42  
43  
44 18  
45

### 46 19 ***Definitions***

47  
48  
49 20 Standard definitions of adverse events have been described elsewhere in detail.<sup>[14]</sup> Taking a  
50  
51 21 medication within 30 days means using the medication during this period after discharge  
52  
53 22 without discontinuation.  
54  
55  
56  
57 23  
58  
59  
60 24

### 60 24 ***Follow-up and endpoints***

1  
2  
3 1 Patients were followed by clinical visits or telephone call at 30 days, 6 months, 12 months, 18  
4  
5 2 months, and 24 months. Adverse events (such as death, recurrent myocardial infarction, and  
6  
7 3 heart failure worsening) and medications at follow-up time points were collected by trained  
8  
9 4 cardiologists or cardiovascular fellows. The primary endpoints of this analysis were all-cause  
10  
11 5 mortality within 30 days after AMI hospitalization (for establishing 30-day risk prediction  
12  
13 6 model) and mortality between 30 days and 2 years (for establishing 2-year risk prediction  
14  
15 7 model).

### 21 8

### 22

### 23 9 ***Statistical analysis***

### 24

### 25

26 10 Categorical variables were summarized as frequencies and percentages, and compared by chi-  
27  
28 11 square or Fisher exact test, as appropriate. Continuous variables were expressed as mean  $\pm$   
29  
30 12 standard deviation or medians (interquartile range) according to data distributions, and  
31  
32 13 compared by student t or nonparametric test. Kaplan-Meier curve and density plots were used  
33  
34 14 to depict the changing nature of risk after AMI hospitalization. In the derivation cohort, 190  
35  
36 15 deaths occurred within 30 days after discharge, which could ensure at most 19 predictor  
37  
38 16 parameters (greater than 12 predictor parameters finally included) in the 30-day risk prediction  
39  
40 17 model based on the rule of thumb that 10 events per candidate predictor parameters (EPP).  
41  
42 18 Similarly, 740 deaths occurred between 30 days and 2 years, which could ensure at most 74  
43  
44 19 predictor parameters (greater than 15 predictor parameters finally included) in the 2-year risk  
45  
46 20 prediction model.<sup>[15]</sup>

47  
48  
49  
50  
51 21 The derivation cohort was used to identify predictors of 30-day mortality and mortality  
52  
53 22 between 30 days and 2 years. The associations between variables, including age, sex, body mass  
54  
55 23 index (BMI), diabetes, hypertension, hyperlipidemia, smoking, prior angina pectoris, prior  
56  
57 24 myocardial infarction, prior heart failure, prior stroke, prior peripheral artery disease, prior  
58  
59  
60

1  
2  
3 1 percutaneous coronary intervention (PCI), prior coronary artery bypass graft (CABG), prior  
4  
5 2 renal dysfunction, chronic obstructive pulmonary disease (COPD), symptom onset to admission  
6  
7  
8 3 time, heart rate, systolic blood pressure, Killip class, cardiac arrest at admission, diagnosis,  
9  
10 4 anterior wall involvement, creatinine clearance, hemoglobin, leukocyte count, left ventricular  
11  
12 5 ejection fraction (LVEF), in-hospital PCI, in-hospital CABG, heart failure, recurrent  
13  
14 6 myocardial ischemia, recurrent myocardial infarction, stroke, other bleeding events (bleeding  
15  
16 7 events not including cerebral hemorrhage) during hospitalization, antiplatelet therapy at  
17  
18 8 discharge, statins at discharge,  $\beta$  blockers at discharge, and angiotensin converting enzyme  
19  
20 9 inhibitor (ACEI) or angiotensin II receptor blocker (ARB) at discharge, and 30-day mortality  
21  
22 10 were first assessed in univariable Cox regression models. For obtaining prognostic factors of  
23  
24 11 mortality between 30 days and 2 years, the associations of adverse events within 30 days  
25  
26 12 (recurrent myocardial infarction and heart failure worsening) and 30-day medications  
27  
28 13 (antiplatelet therapy, statins,  $\beta$  blockers, and ACEI/ARB) with mortality were also assessed in  
29  
30 14 univariable Cox models besides variables mentioned previously. Subsequently, the least  
31  
32 15 absolute shrinkage and selection operator (LASSO) method was adopted to select predictors of  
33  
34 16 short-term and long-term mortality respectively from variables with  $P \leq 0.1$  in univariable  
35  
36 17 analysis. The selected predictors were used to establish dynamic risk prediction models by  
37  
38 18 multivariable Cox regression model. The relative importance of these variables was ranked  
39  
40 19 according to the proportion of explainable log-likelihood ratio  $\chi^2$  statistics.

41  
42 20 To analyze the incremental prognostic value of adverse events and medications over  
43  
44 21 traditional predictive indexes, we compared the predictive performance between models with  
45  
46 22 or without adverse events and medications using C index, net reclassification index (NRI),  
47  
48 23 integrated discrimination improvement index (IDI), likelihood ratio test, and Bayesian  
49  
50 24 information criteria (BIC). The clinical utility of models were compared by decision curve  
51  
52 25 analysis. Predictive performance was also compared between 30-day risk model or 2-year risk  
53  
54  
55  
56  
57  
58  
59  
60

1  
2  
3 1 model and the Global Registry of Acute Coronary Events (GRACE) risk scores (version 1.0  
4  
5 2 and 2.0) to further analyze the additional value of the dynamic models beyond existing  
6  
7  
8 3 prognostic tool.<sup>[6,16]</sup>  
9

10  
11 4 Two prognostic nomograms, which could make complex predictive formulas friendly to  
12  
13 5 use in clinical practice, were constructed based on the regression coefficients of predictors for  
14  
15 6 mortality using the “rms” package of R software. Discrimination and calibration of the  
16  
17 7 nomograms were assessed by C index and calibration curves presenting the relationship  
18  
19 8 between observed and predicted survival probabilities in both derivation and validation cohorts.  
20  
21 9 Subgroup analyses were performed in patients with complete data on model predictors in the  
22  
23 10 validation cohort according to age, sex, diabetes, AMI classification, in-hospital PCI, and  
24  
25 11 hospital level (province level, prefecture level, and county level).  
26  
27  
28  
29

30 12 Before regression analysis, we used Martingale residual plots to check the linearity  
31  
32 13 assumption for continuous variables (online supplemental figure 2 and 3). We also calculated  
33  
34 14 variance inflation factor to examine multicollinearity issue. The proportional hazards  
35  
36 15 assumptions were tested by inspection of Schoenfeld residual plots (online supplemental figure  
37  
38 16 4 and 5). Multiple imputation was used to generate 5 datasets without missing values. The  
39  
40 17 LASSO method was performed in each dataset. Only variables selected by LASSO method in  
41  
42 18 all 5 datasets were included in final dynamic risk prediction models. Number of missing values  
43  
44 19 for selected predictors were shown in online supplemental table 1. Results of Cox regression  
45  
46 20 models were reported as hazard ratios (HR) with 95% confidence intervals (CI). A two-tailed  
47  
48 21  $P < 0.05$  was considered statistically significant. Statistical analyses were performed using R  
49  
50 22 version 4.0.5 (R Foundation for Statistical Computing, Vienna, Austria) and SAS version 9.4  
51  
52 23 (SAS Institute Inc., Cary, NC, USA).  
53  
54  
55  
56  
57  
58  
59  
60

### ***Patient and public involvement***

Patients or the public were not involved directly in the design, conduct, reporting or dissemination plans of our research.

### **Results**

Baseline characteristics, medications, and outcomes of derivation and validation cohorts were summarized in table 1, online supplemental table 2 and online supplemental table 3. Rates of 30-day mortality among hospital survivors in derivation and validation cohorts were 1.2% (190/15925 patients) and 1.3% (103/7962 patients), respectively. Rates of mortality between 30 days and 2 years were 6.1% (740/12136 patients) and 5.7% (345/6067 patients). The Kaplan-Meier curve and density plots showed the changing risk of death and recurrent myocardial infarction within 2 years after AMI hospitalization (online supplemental figure 6 and 7).

### ***Predictors of 30-day mortality in patients after AMI***

Univariable analysis of the associations between variables and 30-day mortality was presented in online supplemental table 4. In the LASSO-based Cox regression model, age, prior stroke, heart rate, Killip class, LVEF, in-hospital PCI, in-hospital recurrent myocardial ischemia, in-hospital recurrent myocardial infarction, in-hospital heart failure, antiplatelet therapy, and statins at discharge were independently associated with 30-day mortality (online supplemental figure 8 to 12; table 2). The relative importance of these predictors was ranked and shown in online supplemental figure 13.

### ***Predictors of 2-year mortality for 30-day survivors after AMI hospitalization***



1  
2  
3 1 Univariable analysis of mortality between 30 days and 2 years after AMI hospitalization was  
4  
5 2 shown in online supplemental table 5. In the LASSO-based Cox regression model, age, prior  
6  
7 3 renal dysfunction, history of heart failure, AMI classification, heart rate, Killip class,  
8  
9 4 hemoglobin, LVEF, in-hospital PCI, in-hospital heart failure, heart failure worsening within 30  
10  
11 5 days, antiplatelet therapy,  $\beta$  blocker, and statins within 30 days were identified as predictors of  
12  
13 6 mortality (online supplemental figure 14 to 18; table 3). The relative importance of these  
14  
15 7 predictors was ranked and presented in online supplemental figure 19.  
16  
17  
18  
19  
20 8

### 21 22 23 9 ***Incremental prognostic value of adverse events and medications***

24  
25  
26 10 The inclusion of in-hospital recurrent myocardial ischemia, in-hospital recurrent myocardial  
27  
28 11 infarction, in-hospital heart failure, antiplatelet therapy, and statins at discharge significantly  
29  
30 12 improved the predictive power of 30-day risk prediction model (table 4; 30-day model 1 vs 30-  
31  
32 13 day model 0: C index, 0.855 [0.830-0.879] vs 0.822 [0.796-0.848]; NRI [95%CI], 0.445 [0.339-  
33  
34 14 0.523],  $P<0.0001$ ; IDI [95%CI], 0.040 [0.025-0.074],  $P<0.0001$ ; likelihood ratio test  $P<0.0001$ ;  
35  
36 15 BIC, 3434.091 vs 3350.882). In the 2-year risk prediction model, heart failure worsening within  
37  
38 16 30 days, antiplatelet,  $\beta$  blocker, and statins within 30 days also provided additional prognostic  
39  
40 17 value over predictive indexes obtained during hospitalization (table 5). The decision curve  
41  
42 18 analysis further demonstrated better clinical utility after adding adverse events and medications  
43  
44 19 into 30-day and 2-year risk models (online supplemental figure 20). Notably, the hospital level  
45  
46 20 provided no incremental value to 30-day or 2-year risk models (the inclusion of hospital level  
47  
48 21 to 30-day model, likelihood ratio test  $P=0.4174$ ; to 2-year model, likelihood ratio test  $P=0.5621$ ;  
49  
50 22 online supplemental figure 21).  
51  
52  
53  
54  
55  
56  
57  
58  
59  
60

### 23 24 25 26 27 28 29 30 31 32 33 34 35 36 37 38 39 40 41 42 43 44 45 46 47 48 49 50 51 52 53 54 55 56 57 58 59 60 ***Comparisons of prognostic models and GRACE risk scores***

1  
2  
3 1 For predicting 30-day mortality, the 30-day risk prediction model showed significantly better  
4  
5 2 predictive performance than both GRACE 1.0 and 2.0 scores (30-day risk model vs GRACE  
6  
7 3 1.0 score: C index, 0.855 [0.830-0.879] vs 0.771 [0.740-0.802]; NRI [95%CI], 0.412 [0.307-  
8  
9 4 0.485],  $P < 0.0001$ ; IDI [95%CI], 0.048 [0.032-0.090],  $P < 0.0001$ ; BIC, 3267.271 vs 3402.578;  
10  
11 5 30-day risk model vs GRACE 2.0 score: C index, 0.855 [0.830-0.879] vs 0.752 [0.720-0.784];  
12  
13 6 NRI [95%CI], 0.569 [0.500-0.624],  $P < 0.0001$ ; IDI [95%CI], 0.061 [0.044-0.101],  $P < 0.0001$ ;  
14  
15 7 BIC, 3247.357 vs 3492.004). Similarly, when predicting 2-year mortality, the 2-year risk  
16  
17 8 prediction model also performed better than the GRACE risk scores (2-year risk model vs  
18  
19 9 GRACE 1.0 score: C index, 0.825 [0.811-0.839] vs 0.798 [0.783-0.813]; NRI [95%CI], 0.191  
20  
21 10 [0.147-0.257],  $P < 0.0001$ ; IDI [95%CI], 0.041 [0.031-0.057],  $P < 0.0001$ ; BIC, 12540.559 vs  
22  
23 11 12697.527; 2-year risk model vs GRACE 2.0 score: C index, 0.825 [0.811-0.839] vs 0.769  
24  
25 12 [0.752-0.786]; NRI [95%CI], 0.486 [0.456-0.529],  $P < 0.0001$ ; IDI [95%CI], 0.115 [0.098-  
26  
27 13 0.143],  $P < 0.0001$ ; BIC, 12257.375 vs 12934.783). The decision curve analysis further  
28  
29 14 demonstrated better clinical utility of both 30-day and 2-year risk models than GRACE scores  
30  
31 15 (online supplemental figure 22 and 23).  
32  
33  
34  
35  
36  
37  
38  
39  
40

### 41 ***Nomograms for dynamic risk prediction***

42  
43  
44 18 Two nomograms were created by assigning a weighted score based on regression coefficients  
45  
46 19 of each prognostic index for evaluating 30-day and 2-year mortality risk respectively. All  
47  
48 20 observed values of a prognostic index corresponded vertically to points on the top scale. The  
49  
50 21 sum of points for each index was plotted on the “Total points” scale, and corresponded to  
51  
52 22 mortality risk at the bottom (figure 1 and 2).  
53  
54  
55

56 23 The 30-day prognostic nomogram achieved high discrimination in both derivation and  
57  
58 24 validation cohorts, with C indexes of 0.85 (95% CI: 0.83-0.88) and 0.79 (95% CI: 0.71-0.86)  
59  
60

1  
2  
3 1 respectively. The calibration curves presenting the concordance between observed and  
4  
5 2 predicted 30-day survival probability in two cohorts also showed satisfying calibration of the  
6  
7 3 model (online supplemental figure 24). In addition, the 30-day prognostic nomogram achieved  
8  
9 4 moderate to high discrimination (C indexes: 0.74 to 0.83) in subsets according to age, sex,  
10  
11 5 diabetes, AMI classification, PCI, and hospital level (online supplemental table 6).

12  
13  
14  
15 6 The C indexes of 2-year prognostic nomogram were 0.83 (95% CI: 0.81-0.84) and 0.81  
16  
17 7 (95% CI: 0.79-0.84) in derivation and validation cohorts, respectively. The calibration curves  
18  
19 8 demonstrated excellent calibration of the nomogram in both derivation and validation cohorts  
20  
21 9 (online supplemental figure 25). In aforementioned subgroups of patients, the model  
22  
23 10 discrimination was acceptable (C index: 0.66 to 0.83, online supplemental table 7).  
24  
25  
26  
27  
28  
29  
30  
31

## 32 **Discussion**

33 13 Using data from a large, prospective, multicenter registry, we screened eleven predictors of 30-  
34  
35 14 day mortality, and fourteen variables, including heart failure worsening and medications within  
36  
37 15 30 days, associated with mortality between 30 days and 2 years in patients after AMI  
38  
39 16 hospitalization. These two sets of predictors were used to develop prognostic nomograms which  
40  
41 17 could predict post-discharge mortality for AMI patients in different time phases. The  
42  
43 18 nomograms showed satisfying discrimination and calibration in both derivation and validation  
44  
45 19 cohorts. This is a novel dynamic risk prediction tool which can serve for risk assessment and  
46  
47 20 guide long-term management of patients after AMI.  
48  
49  
50  
51

52 21 A series of risk models have been developed to predict mortality in patients with acute  
53  
54 22 coronary syndromes.<sup>[6,7,17]</sup> These models mainly included prognostic factors obtained at  
55  
56 23 admission, and provided a fixed estimate of survival probability for a given patient. This  
57  
58 24 working mode of prognostic models was helpful for screening high-risk patients and  
59  
60

1  
2  
3 1 determining therapeutic strategies after admission. However, the incidence of adverse  
4  
5 2 cardiovascular events remained considerable after AMI hospitalization. Accumulating evidence  
6  
7  
8 3 has implied that a larger proportion of adverse events occurred in the early phase after AMI  
9  
10 4 hospitalization,<sup>[18]</sup> which reflected the changing risk following AMI and highlighted the  
11  
12 5 importance of risk reassessment during follow-up. Although some risk prediction models, such  
13  
14 6 as the GRACE risk score and dynamic Thrombolysis In Myocardial Infarction (TIMI) risk  
15  
16 7 score, could be used to assess mortality risk at discharge,<sup>[6,9]</sup> none of them could improve  
17  
18 8 prognostic evaluation during follow-up. Considering the higher risk of adverse events in the  
19  
20 9 early period than that at the late stage after AMI hospitalization (online supplemental figure 6  
21  
22 10 and 7), we chose 30 days, which was also one of routine follow-up points after AMI  
23  
24 11 hospitalization in clinical practice, as the time point of risk reassessment to establish dynamic  
25  
26 12 risk prediction models.

27  
28  
29  
30  
31 13 The first model, which was developed to assess 30-day mortality risk at discharge in  
32  
33 14 patients after AMI, included variables related to patients' demographics, hemodynamics, left  
34  
35 15 ventricular systolic function, treatment, in-hospital adverse events, and medications at  
36  
37 16 discharge. Previous studies have established several risk prediction models, such as Platelet  
38  
39 17 glycoprotein IIb/IIIa in Unstable agina: Receptor Suppression Using Integrilin (eptifibatide)  
40  
41 18 Therapy (PURSUIT) and Zwolle risk scores,<sup>[19,20]</sup> to predict 30-day mortality in patients with  
42  
43 19 acute coronary syndromes. However, these models mainly used patient characteristics, clinical  
44  
45 20 presentations at admission as well as angiographic features as prognostic indexes. The present  
46  
47 21 study showed that recurrent myocardial ischemia, recurrent myocardial infarction, heart failure  
48  
49 22 during AMI hospitalization, antiplatelet therapy, and statins use at discharge were  
50  
51 23 independently associated with short-term mortality after discharge, and provided significantly  
52  
53 24 incremental prognostic information over traditional predictive indexes. Therefore, these  
54  
55  
56  
57  
58  
59  
60

1  
2  
3 1 adverse events and medications were included in the novel 30-day risk prediction model, which  
4  
5 2 might assist in decision-making of post-discharge management.  
6  
7

8 3 For the second model assessing 2-year mortality risk in 30-day survivors, we screened new  
9  
10 4 predictors including heart failure worsening within 30 days, antiplatelet therapy,  $\beta$  blocker, and  
11  
12 5 statins use within 30 days after discharge. A prior study showed that mortality rate of patients  
13  
14 6 with an early recurrent myocardial infarction (recurrent myocardial infarction within 90 days  
15  
16 7 of discharge) was nearly 50% within 5 years.<sup>[21]</sup> In the present study, we observed that the  
17  
18 8 recurrent myocardial infarction and heart failure worsening within 30 days after discharge were  
19  
20 9 associated with >3-fold and >4.5-fold increase of 2-year mortality risk respectively in  
21  
22 10 univariable analysis, and heart failure worsening, which was included in 2-year prognostic  
23  
24 11 nomogram, was a statistically significant prognostic index in multivariable analysis. To our best  
25  
26 12 knowledge, this is the first prognostic instrument taking follow-up adverse event after AMI into  
27  
28 13 consideration. In addition, although some studies analyzed the prognostic impact of secondary  
29  
30 14 prevention implementation in patients after AMI,<sup>[22,23]</sup> follow-up medications have not been  
31  
32 15 considered as predictive indexes in risk models for AMI so far. For some patients, not taking  
33  
34 16 optimal medical care within 30 days after discharge could be explained by poor medication  
35  
36 17 adherence after AMI, which was a problem for both developed and developing countries.<sup>[23-25]</sup>  
37  
38 18 A study found that about 30% of patients with myocardial infarction who underwent PCI in the  
39  
40 19 United States reported suboptimal adherence to prescribed medications in six weeks after  
41  
42 20 hospitalization.<sup>[25]</sup> Data from the China PEACE Prospective AMI study also showed that a  
43  
44 21 similar percentage of AMI patients did not take medications as prescribed in the first month  
45  
46 22 after discharge.<sup>[23]</sup> Patients with early medication nonadherence not only suffered a higher risk  
47  
48 23 of early adverse events, but might not comply with long-term secondary prevention measures,  
49  
50 24 and therefore had poorer long-term prognosis. Another situation was that patients were not  
51  
52 25 prescribed with some medications by physicians, due to contraindications or high risk of side  
53  
54  
55  
56  
57  
58  
59  
60

1  
2  
3 1 effects. However, lack of secondary prevention medications after AMI still meant a higher risk  
4  
5 2 of cardiovascular adverse events in these patients. Indeed, our analysis showed that insufficient  
6  
7  
8 3 use of antiplatelet therapy,  $\beta$  blocker, and statins within 30 days after AMI hospitalization had  
9  
10 4 significant negative impact on 2-year survival. The inclusion of follow-up medications and  
11  
12 5 adverse events improved risk prediction of 2-year risk prediction model.  
13  
14

15 6 Although a previous study from CAMI registry showed that there were significant  
16  
17 7 variations in in-hospital mortality among three levels of hospitals in China,<sup>[14]</sup> hospital level  
18  
19  
20 8 was not used as a predictive index in the present risk prediction models, for the improvement  
21  
22 9 of care quality in relatively low-level hospitals was likely to weaken its prognostic value.  
23  
24 10 Besides, the hospital level was showed to provide no additional prognostic information beyond  
25  
26  
27 11 current predictors in the risk prediction models. Socioeconomic factors, which were known as  
28  
29 12 risk factors for survival following myocardial infarction,<sup>[26-29]</sup> were not included in the present  
30  
31 13 models because we sought to develop models based on predictors directly reflecting patients'  
32  
33  
34 14 clinical conditions. Notably, these factors were also not included in existing risk prediction  
35  
36 15 tools.<sup>[6,7,9,16]</sup> The rates of COPD and prior heart failure in our cohort were lower than the United  
37  
38 16 Kingdom population of AMI.<sup>[30]</sup> However, the rates in the present study were similar with data  
39  
40  
41 17 from the Improving Care for Cardiovascular Disease in China-Acute Coronary Syndrome  
42  
43 18 project, which was also a nationwide registry in China.<sup>[31,32]</sup> The distinct prevalence of  
44  
45 19 comorbidity in patients with myocardial infarction between countries highlighted the  
46  
47 20 importance of developing risk prediction model for specific population.  
48  
49

50 21 The present study showed that the dynamic prognostic nomograms achieved satisfying  
51  
52 22 discrimination and calibration, and performed well in subgroups of patients according to age,  
53  
54 23 sex, diabetes, AMI classification, PCI, and hospital level. The clinical utility of nomograms  
55  
56  
57 24 was further confirmed by decision curve analysis. Prognostic nomogram is a graphical  
58  
59 25 presentation format for complex predictive regression model.<sup>[33]</sup> A series of prognostic

1  
2  
3 1 nomograms have been established for risk prediction in patients with cancer or cardiovascular  
4  
5 2 diseases.<sup>[34-39]</sup> For patients with myocardial infarction, previous prognostic nomograms mainly  
6  
7  
8 3 focused on evaluating short-term risk of mortality or other adverse events.<sup>[37,38]</sup> There also  
9  
10 4 existed nomogram developed to predict risk of adverse events beyond 1 year.<sup>[36]</sup> However,  
11  
12 5 without consideration of changing nature of event risk or medications, the nomogram might not  
13  
14 6 play roles in post-discharge management of patients. Our prognostic nomograms, which took  
15  
16  
17 7 into account follow-up adverse event as well as medications, could assist in risk reassessment  
18  
19 8 at 30 days after discharge. In detail, using the nomogram for prediction of 30-day mortality,  
20  
21 9 physicians can identify high-risk patients at discharge. At 30-day follow up, the second  
22  
23  
24 10 nomogram can be used to reassess mortality risk of 30-day survivors, and may guide decision-  
25  
26 11 making of long-term follow-up intensity and strategies of medical care.

## 32 13 **Limitations**

33  
34  
35 14 Several important limitations in this study should be mentioned. First, as a retrospective  
36  
37 15 analysis of a prospective cohort, this study only used data which had been collected in the  
38  
39 16 CAMI registry. Although the present risk prediction tool has achieved satisfying discrimination  
40  
41  
42 17 and calibration, it may be further improved by including other prognostic factors of AMI, such  
43  
44 18 as details of angiographic characteristics, which were not available in a large proportion of the  
45  
46 19 cohort. Heart failure worsening and medications within 30 days after discharge were included  
47  
48 20 in the 2-year risk prediction model. However, lifestyle interventions and cardiac rehabilitation  
49  
50 21 programmes, which were associated with lower risk of adverse events in patients with coronary  
51  
52 22 artery disease,<sup>[40,41]</sup> as well as laboratory and echocardiographic indexes were not collected  
53  
54  
55 23 during follow up. These variables may also improve the predictive performance of the models.  
56  
57 24  
58 24 Second, although the present study showed the feasibility of assessing 2-year prognosis at 30  
59  
60 25 days after discharge, risk reassessment is a serial process and ideally performed at more time

1  
2  
3 1 points beyond the early phase after discharge. Models which can ensure more dynamic and  
4  
5 2 accurate risk prediction are still needed. Third, the distribution of AMI types (types 1, 2, 3, 4b,  
6  
7 and 4c) was not collected in the CAMI registry. Results of the present study could have biased  
8  
9 if a certain type was more represented than another. However, the CAMI registry enrolled  
10  
11 4 patients consecutively from 108 hospitals, which meant that it was representative of AMI  
12  
13 5 population in routine clinical practice. It is plausible that the impact of distribution of AMI  
14  
15 6 types is relatively limited. Fourth, there existed some missing values which needed to be  
16  
17 7 imputed before regression analysis. However, almost all predictors had missing values of <6%.  
18  
19 8 Finally, our dynamic models were only internally validated in Chinese patients. Further  
20  
21 9 validations in external cohorts including patients of other races are needed.  
22  
23  
24 10  
25  
26  
27 11  
28

## 29 12 **Conclusions**

30  
31  
32 13 The dynamic risk prediction tool consisted of a short-term prognostic model and a long-term  
33  
34 14 prognostic model for patients after AMI hospitalization. Taking the changing nature of adverse  
35  
36 15 events and medications into consideration, the models can serve prospective risk stratification  
37  
38 16 and guide post-discharge management of AMI. Dynamic risk prediction may play an important  
39  
40 17 role in therapeutic decision-making and quality improvement of secondary prevention after  
41  
42 18 AMI hospitalization.  
43  
44  
45  
46  
47 19  
48  
49

## 50 20 **Acknowledgments**

51  
52 21 We appreciate all staff and investigators for their contributions to the CAMI registry.  
53  
54  
55 22  
56  
57

## 58 23 **Contributors**



1  
2  
3 1 HX and YYang contributed significantly to the conception, design, and conduction of this study.  
4  
5 2 JL and CW wrote the initial manuscript. CW, YZ, and YW provided strong support in statistical  
6  
7 3 analysis. JL, CW, XG, JY, XZ, YYe, QD, RF, HS, XY, YZ, YW, HX, and YYang contributed  
8  
9 4 significantly to revisions of manuscript, analysis, and interpretation of data. All authors  
10  
11 5 contributed substantially to this study and approved its submission.  
12  
13  
14  
15  
16  
17

## 18 7 **Funding**

19  
20  
21 8 This work was supported by the Twelfth Five-Year Planning Project of the Scientific and  
22  
23 9 Technological Department of China [grant number 2011BAI11B02] and Beijing Nova Program  
24  
25 [grant number Z211100002121063].  
26  
27  
28  
29  
30  
31

## 32 12 **Competing Interests**

33  
34  
35 13 None declared.  
36  
37  
38  
39  
40  
41

## 42 15 **Patient consent for publication**

43  
44 16 Not required.  
45  
46  
47  
48  
49  
50

## 51 18 **Ethics approval**

52  
53 19 The CAMI registry conformed to the ethical guidelines of the Declaration of Helsinki, and was  
54  
55 20 approved by the institutional review board central committee at Fuwai Hospital, National  
56  
57 21 Center for Cardiovascular Diseases of China (Approval No. 2012-431). Written informed  
58  
59 22 consent was given by eligible patients before registration.  
60

1  
2  
3  
4  
5  
6  
7  
8  
9  
10  
11  
12  
13  
14  
15  
16  
17  
18  
19  
20  
21  
22  
23  
24  
25  
26  
27  
28  
29  
30  
31  
32  
33  
34  
35  
36  
37  
38  
39  
40  
41  
42  
43  
44  
45  
46  
47  
48  
49  
50  
51  
52  
53  
54  
55  
56  
57  
58  
59  
60

1  
2  
3  
4  
5  
6  
7  
8  
9

**Data Availability Statement**

Data are available on reasonable request from the corresponding authors.

## References

1. Peterson ED, Shah BR, Parsons L, et al. Trends in quality of care for patients with acute myocardial infarction in the National Registry of Myocardial Infarction from 1990 to 2006. *Am Heart J* 2008;156:1045-55.
2. Yamamoto T, Yoshida N, Takayama M; Tokyo CCU Network. Temporal trends in acute myocardial infarction incidence and mortality between 2006 and 2016 in Tokyo - Report from the Tokyo CCU Network. *Circ J* 2019;83:1405-9.
3. Chaudhry SI, Khan RF, Chen J, et al. National trends in recurrent AMI hospitalizations 1 year after acute myocardial infarction in Medicare beneficiaries: 1999-2010. *J Am Heart Assoc* 2014;3:e001197.
4. Ergatoudes C, Thunström E, Rosengren A, et al. Long-term secondary prevention of acute myocardial infarction (SEPAT) - guidelines adherence and outcome. *BMC Cardiovasc Disord* 2016;16:226.
5. Zhao Q, Xu H, Zhang X, et al. Current status and hospital-level differences in care and outcomes of patients with acute non-ST-segment elevation myocardial infarction in China: insights from China Acute Myocardial Infarction Registry. *Front Cardiovasc Med* 2022;8:800222.
6. Eagle KA, Lim MJ, Dabbous OH, et al. A validated prediction model for all forms of acute coronary syndrome: estimating the risk of 6-month postdischarge death in an international registry. *JAMA* 2004;291:2727-33.
7. Antman EM, Cohen M, Bernink PJ, et al. The TIMI risk score for unstable angina/non-ST elevation MI: A method for prognostication and therapeutic decision making. *JAMA* 2000;284:835-42.

- 1  
2  
3 1 8. Chang WC, Boersma E, Granger CB, et al. Dynamic prognostication in non-ST-elevation  
4  
5 2 acute coronary syndromes: insights from GUSTO-IIb and PURSUIT. *Am Heart J*  
6  
7 3 2004;148:62-71.
- 8  
9  
10 4 9. Amin ST, Morrow DA, Braunwald E, et al. Dynamic TIMI risk score for STEMI. *J Am*  
11  
12 5 *Heart Assoc* 2013;2:e003269.
- 13  
14  
15 6 10. Chang WC, Kaul P, Fu Y, et al. Forecasting mortality: dynamic assessment of risk in ST-  
16  
17 7 segment elevation acute myocardial infarction. *Eur Heart J* 2006;27:419-26.
- 18  
19  
20 8 11. Westerhout CM, Pieper KS, James SK, et al. Dynamic modeling of 90-day mortality in  
21  
22 9 ST-elevation myocardial infarction patients undergoing primary percutaneous coronary  
23  
24 10 intervention. *Am Heart J* 2013;165:354-62.e2.
- 25  
26  
27 11 12. Xu H, Li W, Yang J, et al. Tal Infarction (CAMI) Registry: a national long-term registry-  
28  
29 12 research-education integrated platform for exploring acute myocardial infarction in China.  
30  
31 13 *Am Heart J* 2016;175:193-201.e3.
- 32  
33  
34 14 13. Thygesen K, Alpert JS, Jaffe AS, et al. Third universal definition of myocardial infarction.  
35  
36 15 *Circulation* 2012;126:2020-35.
- 37  
38  
39 16 14. Xu H, Yang Y, Wang C, et al. Association of hospital-level differences in care with  
40  
41 17 outcomes among patients with acute ST-segment elevation myocardial infarction in China.  
42  
43 18 *JAMA Netw Open* 2020;3:e2021677.
- 44  
45  
46 19 15. Riley RD, Ensor J, Snell KIE, et al. Calculating the sample size required for developing a  
47  
48 20 clinical prediction model. *BMJ* 2020;368:m441.
- 49  
50  
51 21 16. Fox KA, Fitzgerald G, Puymirat E, et al. Should patients with acute coronary disease be  
52  
53 22 stratified for management according to their risk? Derivation, external validation and  
54  
55 23 outcomes using the updated GRACE risk score. *BMJ Open* 2014;4:e004425.
- 56  
57  
58  
59  
60

- 1  
2  
3 1 17. McNamara RL, Kennedy KF, Cohen DJ, et al. Predicting in-hospital mortality in  
4  
5 2 patients with acute myocardial infarction. *J Am Coll Cardiol* 2016;68:626-35.  
6  
7  
8 3 18. Song J, Murugiah K, Hu S, et al. Incidence, predictors, and prognostic impact of recurrent  
9  
10 4 acute myocardial infarction in China. *Heart* 2020;107:313-8.  
11  
12  
13 5 19. Boersma E, Pieper KS, Steyerberg EW, et al. Predictors of outcome in patients with acute  
14  
15 6 coronary syndromes without persistent ST-segment elevation. Results from an  
16  
17 7 international trial of 9461 patients. The PURSUIT Investigators. *Circulation*  
18  
19 8 2020;101:2557-67.  
20  
21  
22  
23 9 20. De Luca G, Suryapranata H, van 't Hof AW, et al. Prognostic assessment of patients with  
24  
25 10 acute myocardial infarction treated with primary angioplasty: implications for early  
26  
27 11 discharge. *Circulation* 2004;109:2737-43.  
28  
29  
30  
31 12 21. Nair R, Johnson M, Kravitz K, et al. Characteristics and outcomes of early recurrent  
32  
33 13 myocardial infarction after acute myocardial infarction. *J Am Heart Assoc*  
34  
35 14 2021;10:e019270.  
36  
37  
38  
39 15 22. Chow CK, Brieger D, Ryan M, et al. Secondary prevention therapies in acute coronary  
40  
41 16 syndrome and relation to outcomes: observational study. *Heart Asia* 2019;11:e011122.  
42  
43  
44 17 23. Shang P, Liu GG, Zheng X, et al. Association between medication adherence and 1-year  
45  
46 18 major cardiovascular adverse events after acute myocardial infarction in China. *J Am Heart*  
47  
48 19 *Assoc* 2019;8:e011793.  
49  
50  
51 20 24. Rymer J, McCoy LA, Thomas L, et al. Persistence of evidence-based medication use after  
52  
53 21 discharge from academic versus nonacademic hospitals among patients with non-ST-  
54  
55 22 segment elevation myocardial infarction. *Am J Cardiol* 2014;114:1479-84.  
56  
57  
58  
59  
60

- 1  
2  
3 1 25. Mathews R, Peterson ED, Honeycutt E, et al. Early medication nonadherence after acute  
4  
5 2 myocardial infarction: insights into actionable opportunities from the Treatment with ADP  
6  
7 3 receptor inhibitorS: Longitudinal Assessment of Treatment Patterns and Events after  
8  
9 4 Acute Coronary Syndrome (TRANSLATE-ACS) Study. *Circ Cardiovasc Qual Outcomes*  
10  
11 2015;8:347-56.  
12  
13  
14  
15 6 26. Machón M, Aldasoro E, Martínez-Cambor P, et al. Socioeconomic differences in  
16  
17 7 incidence and relative survival after a first acute myocardial infarction in the Basque  
18  
19 8 Country, Spain. *Gac Sanit* 2012;26:16-23.  
20  
21  
22  
23 9 27. Alter DA, Franklin B, Ko DT, et al. Socioeconomic status, functional recovery, and long-  
24  
25 10 term mortality among patients surviving acute myocardial infarction. *PLoS One*  
26  
27 11 2013;8:e65130.  
28  
29  
30 12 28. Bucholz EM, Ma S, Normand SL, et al. Race, socioeconomic status, and life expectancy  
31  
32 13 after acute myocardial infarction. *Circulation* 2015;132:1338-46.  
33  
34  
35  
36 14 29. Tetzlaff J, Tetzlaff F, Geyer S, et al. Widening or narrowing income inequalities in  
37  
38 15 myocardial infarction? Time trends in life years free of myocardial infarction and after  
39  
40 16 incidence. *Popul Health Metr* 2021;19:47.  
41  
42  
43  
44 17 30. Rothnie KJ, Smeeth L, Pearce N, et al. Predicting mortality after acute coronary syndromes  
45  
46 18 in people with chronic obstructive pulmonary disease. *Heart* 2016;102:1442-8.  
47  
48  
49 19 31. Cai X, Zhou J, Li W, et al. Potential influential factors of in-hospital myocardial  
50  
51 20 reinfarction in ST-segment elevation myocardial infarction (STEMI) patients: finding from  
52  
53 21 the Improving Care for Cardiovascular Disease in China- (CCC-) Acute Coronary  
54  
55 22 Syndrome (ACS) project. *Oxid Med Cell Longev* 2021;2021:9977312.  
56  
57  
58  
59  
60

- 1  
2  
3 1 32. Sun H, Li Z, Song X, et al. Revisiting the lipid paradox in ST-elevation myocardial  
4  
5 2 infarction in the Chinese population: findings from the CCC-ACS project. *Eur Heart J*  
6  
7 3 *Acute Cardiovasc Care* 2021;10:978-987.  
8  
9  
10 4 33. Bonnett LJ, Snell KIE, Collins GS, et al. Guide to presenting clinical prediction models for  
11  
12 5 use in clinical settings. *BMJ* 2019;365:1737.  
13  
14  
15 6 34. Yan B, Su BB, Bai DS, et al. A practical nomogram and risk stratification system predicting  
16  
17 7 the cancer-specific survival for patients with early hepatocellular carcinoma. *Cancer Med*  
18  
19 8 2021;10:496-506.  
20  
21  
22 9 35. Ó Hartaigh B, Gransar H, Callister T, et al. Development and validation of a simple-to-use  
23  
24 10 nomogram for predicting 5-, 10-, and 15-year survival in asymptomatic adults undergoing  
25  
26 11 coronary artery calcium scoring. *JACC Cardiovasc Imaging* 2018;11:450-8.  
27  
28  
29 12 36. Zhao X, Liu C, Zhou P, et al. Estimation of major adverse cardiovascular events in patients  
30  
31 13 with myocardial infarction undergoing primary percutaneous coronary intervention: A risk  
32  
33 14 prediction score model from a derivation and validation study. *Front Cardiovasc Med*  
34  
35 15 2020;7:603621.  
36  
37  
38 16 37. Guo Q, Wu M, Li H, et al. Development and validation of a prognostic nomogram for  
39  
40 17 myocardial infarction patients in intensive care units: a retrospective cohort study. *BMJ*  
41  
42 18 *Open* 2020;10:e040291.  
43  
44  
45 19 38. Zheng X, Huang R, Liu G, et al. Development and verification of a predictive nomogram  
46  
47 20 to evaluate the risk of complicating ventricular tachyarrhythmia after acute myocardial  
48  
49 21 infarction during hospitalization: A retrospective analysis. *Am J Emerg Med* 2021;46:462-  
50  
51 22 8.  
52  
53  
54  
55  
56  
57  
58  
59  
60

- 1  
2  
3 1 39. Wang H, Liu D, Liang H, et al. A nomogram for predicting survival in patients with  
4  
5 2 colorectal cancer incorporating cardiovascular comorbidities. *Front Cardiovasc Med*  
6  
7 3 2022;9:875560.  
8  
9  
10 4 40. Chow CK, Jolly S, Rao-Melacini P, et al. Association of diet, exercise, and smoking  
11  
12 5 modification with risk of early cardiovascular events after acute coronary syndromes.  
13  
14 6 *Circulation* 2010;121:750-8.  
15  
16  
17 7 41. Anderson L, Oldridge N, Thompson DR, et al. Exercise-based cardiac rehabilitation for  
18  
19 8 coronary heart disease: cochrane systematic review and meta-analysis. *J Am Coll Cardiol*  
20  
21 9 2016;67:1-12.  
22  
23  
24  
25  
26 10  
27  
28  
29  
30  
31  
32  
33  
34  
35  
36  
37  
38  
39  
40  
41  
42  
43  
44  
45  
46  
47  
48  
49  
50  
51  
52  
53  
54  
55  
56  
57  
58  
59  
60



1  
2  
3 **Table 1. Baseline characteristics of cohorts for developing and validating 30-day**  
4  
5 **prognostic model**  
6  
7

| Variables                   | Derivation cohort<br>(n=15925) | Validation cohort<br>(n=7962) |
|-----------------------------|--------------------------------|-------------------------------|
| <b>Demographics</b>         |                                |                               |
| Age, yrs                    | 62.27±12.36                    | 62.54±12.29                   |
| Female                      | 3878 (24.4)                    | 1940 (24.4)                   |
| BMI, kg/m <sup>2</sup>      | 24.13±3.05                     | 24.08±3.04                    |
| <b>Medical history</b>      |                                |                               |
| Diabetes                    | 2943 (19.6)                    | 1505 (20.0)                   |
| Hypertension                | 7873 (51.2)                    | 3897 (50.8)                   |
| Hyperlipidemia              | 1154 (8.5)                     | 569 (8.3)                     |
| Current smoker              | 7083 (45.7)                    | 3483 (44.8)                   |
| Prior angina pectoris       | 4044 (27.8)                    | 1994 (27.4)                   |
| Prior myocardial infarction | 1083 (7.4)                     | 553 (7.5)                     |
| Prior heart failure         | 329 (2.2)                      | 169 (2.3)                     |
| Prior PCI                   | 753 (5.0)                      | 381 (5.1)                     |
| Prior CABG                  | 56 (0.4)                       | 36 (0.5)                      |
| Prior renal dysfunction     | 197 (1.3)                      | 94 (1.3)                      |
| COPD                        | 279 (1.9)                      | 142 (1.9)                     |

---

**Presenting characteristics**

## Symptom onset to admission time

|      |             |             |
|------|-------------|-------------|
| 0-6h | 7398 (47.0) | 3625 (46.0) |
| >6h  | 8330 (53.0) | 4247 (54.0) |

## Heart rate, beats/min

|       |       |
|-------|-------|
| 77±18 | 78±18 |
|-------|-------|

## Systolic blood pressure

|              |              |
|--------------|--------------|
| 129.48±25.01 | 129.94±25.26 |
|--------------|--------------|

## Killip class

|       |              |             |
|-------|--------------|-------------|
| I     | 11836 (76.2) | 5903 (75.8) |
| II-IV | 3694 (23.8)  | 1883 (24.2) |

## Cardiac arrest at admission

|           |          |
|-----------|----------|
| 128 (0.8) | 77 (1.0) |
|-----------|----------|

## AMI classification

|        |              |             |
|--------|--------------|-------------|
| STEMI  | 12051 (75.7) | 5991 (75.2) |
| NSTEMI | 3874 (24.3)  | 1971 (24.8) |

## Anterior wall involvement

|             |             |
|-------------|-------------|
| 7406 (47.7) | 3696 (47.5) |
|-------------|-------------|

---

Values are shown as mean ± standard deviation, median (interquartile range), or number (%) without imputation of missing data. BMI, body mass index; PCI, percutaneous coronary intervention; CABG, coronary artery bypass graft; COPD, chronic obstructive pulmonary disease; AMI, acute myocardial infarction; STEMI, ST-segment elevation myocardial infarction; NSTEMI, non-ST-segment elevation myocardial infarction.

1 **Table 2. Multivariable analysis of 30-day mortality in the derivation cohort**

|                                                                  | <b>All-cause death</b>      |                |
|------------------------------------------------------------------|-----------------------------|----------------|
|                                                                  | <b>Adjusted HR (95% CI)</b> | <b>P value</b> |
| Age (per 1 year increase)                                        | 1.035 (1.021, 1.049)        | <0.0001        |
| Prior stroke (vs no)                                             | 1.560 (1.091-2.231)         | 0.0148         |
| Heart rate (per 1beat/min increase)                              | 1.006 (1.000-1.012)         | 0.0497         |
| Killip class II -IV(vs I )                                       | 1.528 (1.115-2.094)         | 0.0083         |
| LVEF (per 1% increase)                                           | 0.969 (0.955, 0.982)        | <0.0001        |
| In-hospital PCI (vs no)                                          | 0.441 (0.307, 0.634)        | <0.0001        |
| In-hospital recurrent myocardial ischemia (vs no)                | 1.711 (1.019-2.871)         | 0.0421         |
| In-hospital recurrent myocardial infarction (vs no)              | 4.572 (2.121-9.859)         | 0.0001         |
| In-hospital heart failure (vs no)                                | 2.869 (2.065-3.986)         | <0.0001        |
| Antiplatelet therapy at discharge (vs dual antiplatelet therapy) |                             |                |
| Single antiplatelet therapy                                      | 0.791 (0.491-1.275)         | 0.3358         |
| None                                                             | 2.363 (1.395-4.003)         | 0.0014         |
| Statins at discharge (vs no)                                     | 2.009 (1.258-3.208)         | 0.0035         |

2 LVEF, left ventricular ejection fraction; PCI, percutaneous coronary intervention; HR, hazard  
3 ratio; CI, confidence interval.

4

1  
2  
3 **1 Table 3. Multivariable analysis of mortality after 30 days in the derivation cohort**  
4  
5

|                                                                    | <b>All-cause death</b>      |                |
|--------------------------------------------------------------------|-----------------------------|----------------|
|                                                                    | <b>Adjusted HR (95% CI)</b> | <b>P value</b> |
| Age (per 1 year increase)                                          | 1.052 (1.045-1.060)         | <0.0001        |
| Prior renal dysfunction (vs no)                                    | 1.539 (1.076-2.201)         | 0.0181         |
| History of heart failure (vs no)                                   | 1.501 (1.160-1.943)         | 0.0020         |
| STEMI (vs NSTEMI)                                                  | 0.747 (0.639-0.873)         | 0.0002         |
| Heart rate (per 1 beat/min increase)                               | 1.008 (1.005-1.011)         | <0.0001        |
| Killip class II -IV(vs I )                                         | 1.330 (1.129-1.566)         | 0.0006         |
| Hemoglobin (per 1g/L increase)                                     | 0.993 (0.990-0.996)         | <0.0001        |
| LVEF (per 1% increase)                                             | 0.971 (0.964-0.978)         | <0.0001        |
| In-hospital PCI (vs no)                                            | 0.423 (0.351-0.510)         | <0.0001        |
| In-hospital heart failure(vs no)                                   | 1.287 (1.085-1.525)         | 0.0037         |
| Heart failure worsening within 30 days (vs no)                     | 1.675 (1.258-2.229)         | 0.0004         |
| Antiplatelet therapy within 30 days (vs dual antiplatelet therapy) |                             |                |
| Single antiplatelet therapy                                        | 1.107 (0.911-1.345)         | 0.3084         |
| None                                                               | 1.430 (1.055-1.937)         | 0.0211         |
| $\beta$ blocker within 30 days (vs yes)                            | 1.271 (1.085-1.491)         | 0.0031         |
| Statins within 30 days (vs yes)                                    | 1.191 (0.908-1.561)         | 0.2075         |

1  
2  
3 1 STEMI, ST-segment elevation myocardial infarction; NSTEMI, non-ST-segment elevation  
4  
5 2 myocardial infarction; LVEF, left ventricular ejection fraction; PCI, percutaneous coronary  
6  
7 3 intervention; HR, hazard ratio; CI, confidence interval.  
8  
9  
10  
11 4  
12  
13  
14  
15  
16  
17  
18  
19  
20  
21  
22  
23  
24  
25  
26  
27  
28  
29  
30  
31  
32  
33  
34  
35  
36  
37  
38  
39  
40  
41  
42  
43  
44  
45  
46  
47  
48  
49  
50  
51  
52  
53  
54  
55  
56  
57  
58  
59  
60

**Table 4. Comparison of 30-day prognostic models with or without adverse events and medications**

|                                 | <b>30-day model 0</b> | <b>30-day model 1</b> |
|---------------------------------|-----------------------|-----------------------|
| C index                         | 0.822 (0.796-0.848)   | 0.855 (0.830-0.879)   |
| NRI (95%CI)                     |                       | 0.445 (0.339-0.523)   |
| P value                         |                       | <0.0001               |
| IDI (95%CI)                     |                       | 0.040 (0.025-0.074)   |
| P value                         |                       | <0.0001               |
| Likelihood ratio test (P value) |                       | <0.0001               |
| BIC                             | 3434.091              | 3350.882              |

30-days Model 0: age, prior stroke, heart rate, Killip class, LVEF, and in-hospital PCI. 30-day Model 1: age, prior stroke, heart rate, Killip class, LVEF, in-hospital PCI, in-hospital recurrent myocardial ischemia, in-hospital recurrent myocardial infarction, in-hospital heart failure, antiplatelet therapy, and statins at discharge. LVEF, left ventricular ejection fraction; PCI, percutaneous coronary intervention; NRI, net reclassification index; CI, confidence interval; IDI, integrated discrimination improvement index; BIC, Bayesian information criteria.

**Table 5. Comparison of 2-year prognostic models with or without adverse events and medications**

|                                 | <b>2-year model 0</b> | <b>2-year model 1</b> |
|---------------------------------|-----------------------|-----------------------|
| C index                         | 0.822 (0.807-0.836)   | 0.825 (0.811-0.839)   |
| NRI (95%CI)                     |                       | 0.119 (-0.045-0.176)  |
| P value                         |                       | 0.126                 |
| IDI (95%CI)                     |                       | 0.008 (0.004-0.017)   |
| P value                         |                       | 0.007                 |
| Likelihood ratio test (P value) |                       | <0.0001               |
| BIC                             | 12792.602             | 12785.706             |

2-year Model 0: age, prior renal dysfunction, prior heart failure, AMI classification, heart rate, Killip class, hemoglobin, LVEF, in-hospital PCI, and in-hospital heart failure. 2-year Model 1: age, prior renal dysfunction, prior heart failure, AMI classification, heart rate, Killip class, hemoglobin, LVEF, in-hospital PCI, in-hospital heart failure, heart failure worsening within 30 days, antiplatelet therapy,  $\beta$  blockers, and statins within 30 days. AMI, acute myocardial infarction; LVEF, left ventricular ejection fraction; PCI, percutaneous coronary intervention; NRI, net reclassification index; CI, confidence interval; IDI, integrated discrimination improvement index; BIC, Bayesian information criteria.

1  
2  
3 **1 FIGURE LEGENDS**  
4  
5

6 **2 Figure 1. Nomogram for predicting 30-day mortality risk.** The observed value of a  
7  
8 **3** prognostic index was assigned a point by drawing a perpendicular line towards the top scale.  
9  
10 **4** The sum of points for each index was plotted on the “Total points” scale, and corresponded to  
11  
12 **5** the risk of 30-day mortality at the bottom with a vertical line. LVEF, left ventricular ejection  
13  
14 **6** fraction; PCI, percutaneous coronary intervention.  
15  
16  
17

18 **7**  
19  
20  
21 **8 Figure 2. Nomogram for predicting 2-year mortality risk.** The observed value of a  
22  
23 **9** prognostic index was assigned a point by drawing a perpendicular line towards the top scale.  
24  
25 **10** The sum of points for each index was plotted on the “Total points” scale, and corresponded to  
26  
27 **11** the risk of 2-year mortality at the bottom with a vertical line. AMI, acute myocardial infarction;  
28  
29 **12** LVEF, left ventricular ejection fraction; PCI, percutaneous coronary intervention.  
30  
31  
32  
33  
34 **13**  
35  
36 **14**  
37  
38  
39  
40  
41  
42  
43  
44  
45  
46  
47  
48  
49  
50  
51  
52  
53  
54  
55  
56  
57  
58  
59  
60



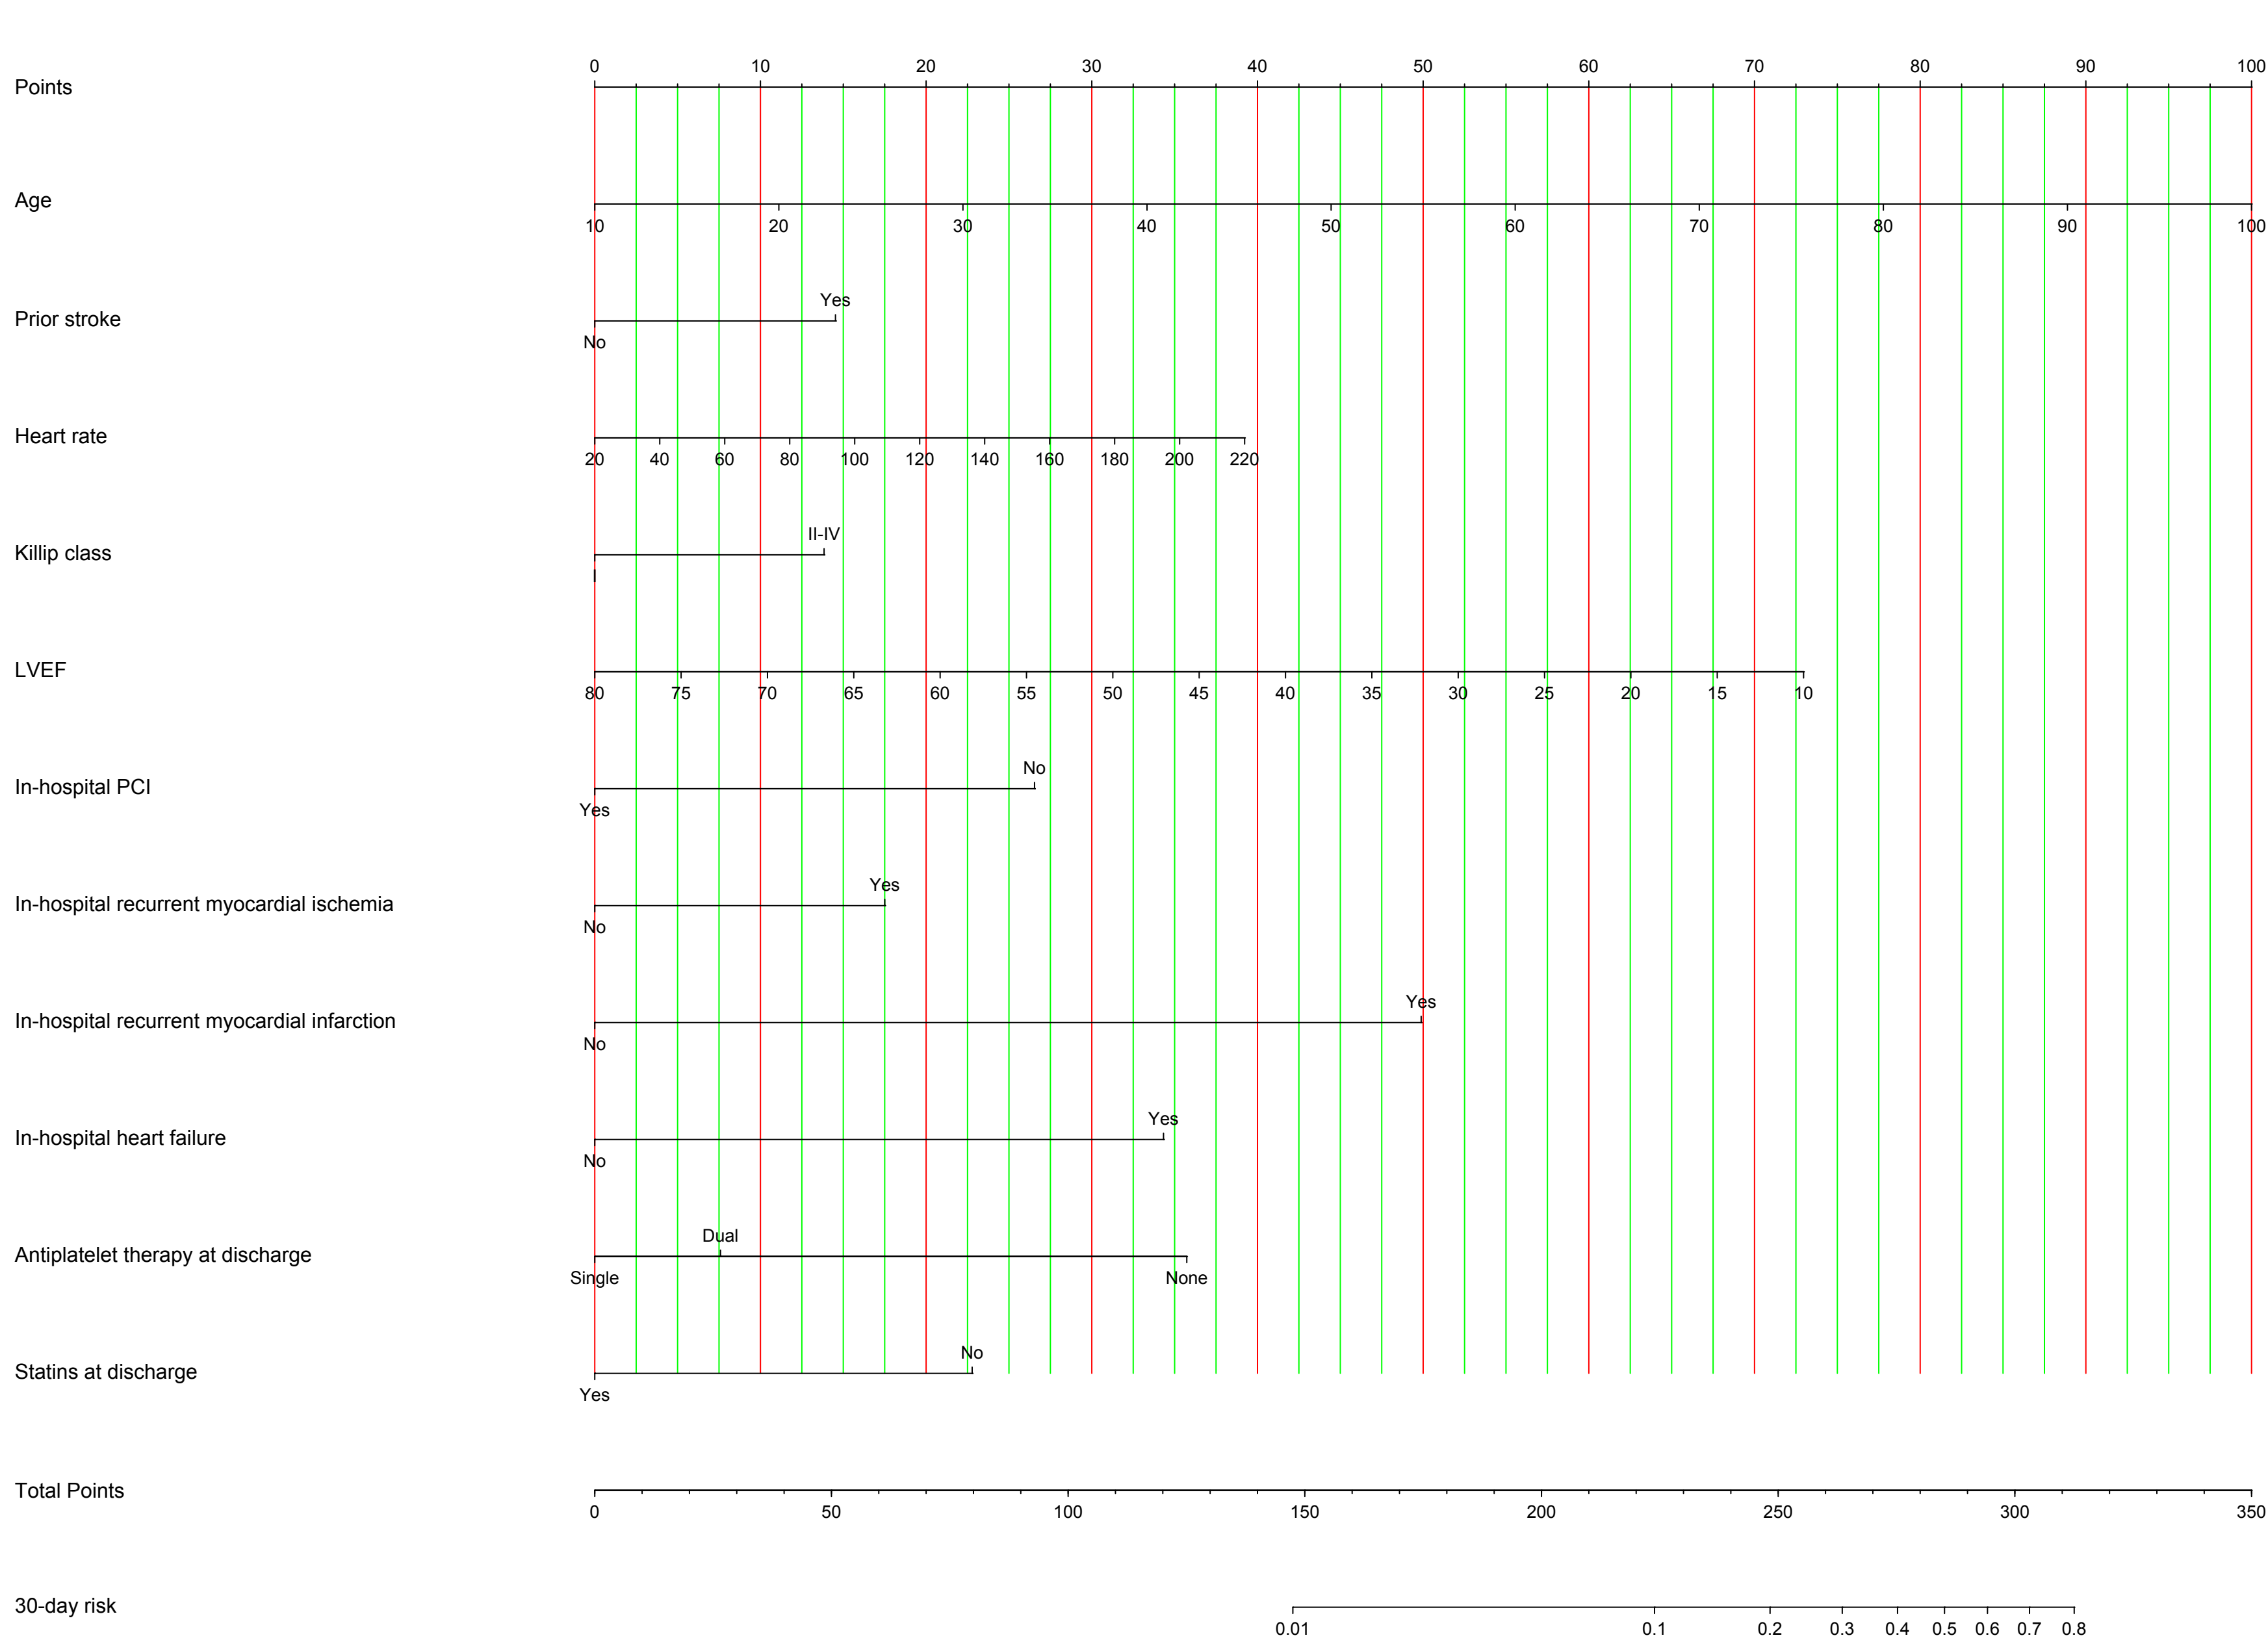

1  
2  
3  
4  
5  
6  
7  
8  
9  
10  
11  
12  
13  
14  
15  
16  
17  
18  
19  
20  
21  
22  
23  
24  
25  
26  
27  
28  
29  
30  
31  
32  
33  
34  
35  
36  
37  
38  
39  
40  
41  
42  
43  
44  
45  
46  
47  
48  
49  
50  
51  
52  
53  
54  
55  
56  
57  
58  
59  
60

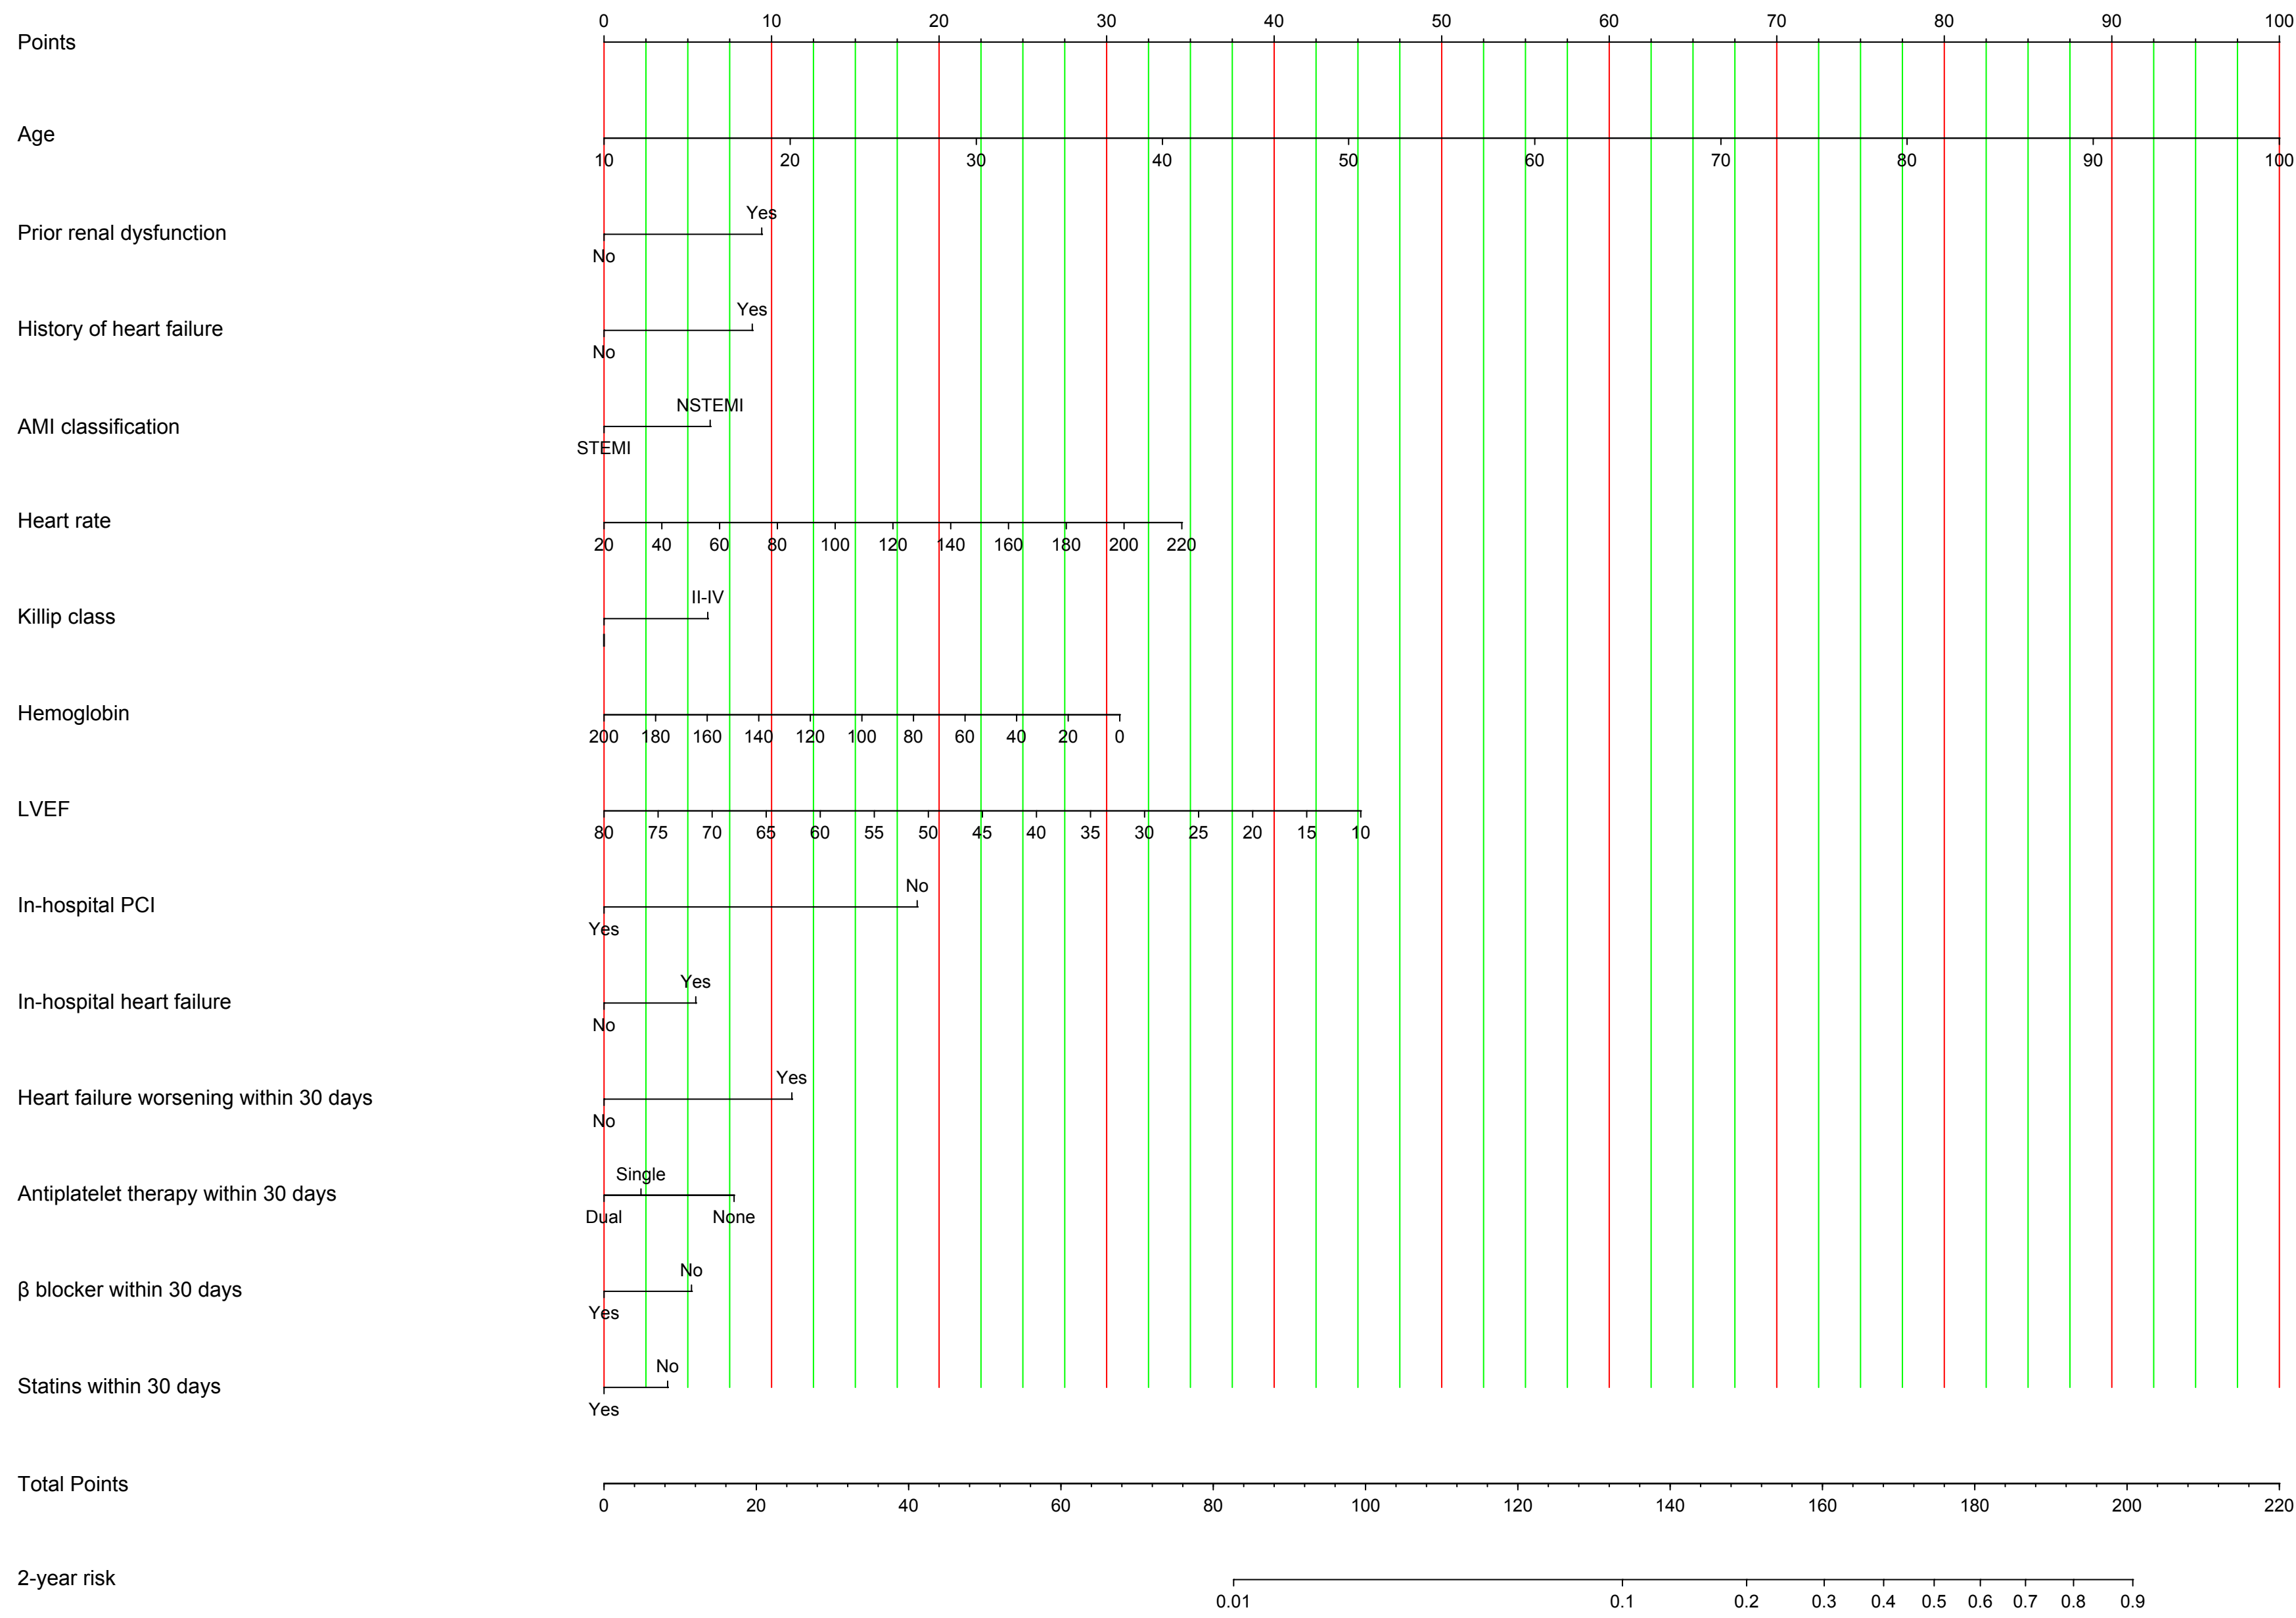

## Supplemental Materials

**Junxing Lv et al. Development and validation of dynamic models to predict post-discharge mortality risk in patients with acute myocardial infarction: results from China Acute Myocardial Infarction registry.**

### **I. Supplemental Tables.**

**Supplemental Table 1. Number of missing values for selected predictors in derivation and validation cohorts.**

**Supplemental Table 2. Baseline characteristics, medications, and outcomes of cohorts for developing and validating 30-day prognostic model.**

**Supplemental Table 3. Baseline characteristics, medications, and outcomes of cohorts for developing and validating 2-year prognostic model.**

**Supplemental Table 4. Univariable analysis of 30-day mortality.**

**Supplemental Table 5. Univariable analysis of mortality after 30 days.**

**Supplemental Table 6. Discrimination of 30-day prognostic nomogram in subgroups of patients.**

**Supplemental Table 7. Discrimination of 2-year prognostic nomogram in subgroups of patients.**

### **II. Supplemental Figures.**

**Supplemental Figure 1. Flowchart of this study. AMI, acute myocardial infarction.**

**Supplemental Figure 2. Martingale residual plots for testing the linearity assumption before developing the 30-day model. LVEF, left ventricular ejection fraction.**

1  
2  
3 **Supplemental Figure 3. Martingale residual plots for testing the linearity assumption**  
4 **before developing the 2-year model.** LVEF, left ventricular ejection fraction.  
5  
6  
7

8 **Supplemental Figure 4. Schoenfeld residual plots for testing the proportional hazards**  
9 **assumption before developing the 30-day model.** LVEF, left ventricular ejection fraction;  
10 PCI, percutaneous coronary intervention; HF, heart failure; reMI, recurrent myocardial  
11 infarction.  
12  
13  
14

15  
16 **Supplemental Figure 5. Schoenfeld residual plots for testing the proportional hazards**  
17 **assumption before developing the 2-year model.** LVEF, left ventricular ejection fraction;  
18 HF, heart failure; AMI, acute myocardial infarction; PCI, percutaneous coronary intervention.  
19  
20  
21

22  
23 **Supplemental Figure 6. Kaplan-Meier curve for patients after AMI hospitalization.** AMI,  
24 acute myocardial infarction.  
25  
26  
27

28  
29 **Supplemental Figure 7. Density plots for all-cause death and recurrent myocardial**  
30 **infarction during follow-up.** (A) Density plot for all-cause death. (B) Density plot for  
31 recurrent myocardial infarction.  
32  
33

34  
35 **Supplemental Figure 8. Variable selection by LASSO method for 30-day prognostic**  
36 **model in imputation dataset 1.** (A) The plot showing partial likelihood deviance values  
37 versus  $\log(\lambda)$ . Tuning parameter  $\lambda$  selection used 10-fold cross-validation. The vertical lines  
38 were drawn at optimal values by the minimum criteria and the 1 SE of minimum criteria. The  
39 lambda with 1 SE of minimum deviance was used for variable selection. (B) The coefficient  
40 profile plot. The plot was produced against the  $\log(\lambda)$  sequence. LASSO, least absolute  
41 shrinkage and selection operator; SE, standard error.  
42  
43  
44

45  
46 **Supplemental Figure 9. Variable selection by LASSO method for 30-day prognostic**  
47 **model in imputation dataset 2.** (A) The plot showing partial likelihood deviance values  
48 versus  $\log(\lambda)$ . Tuning parameter  $\lambda$  selection used 10-fold cross-validation. The vertical lines  
49 were drawn at optimal values by the minimum criteria and the 1 SE of minimum criteria. The  
50 lambda with 1 SE of minimum deviance was used for variable selection. (B) The coefficient  
51 profile plot. The plot was produced against the  $\log(\lambda)$  sequence. LASSO, least absolute  
52 shrinkage and selection operator; SE, standard error.  
53  
54  
55

56  
57 **Supplemental Figure 10. Variable selection by LASSO method for 30-day prognostic**  
58 **model in imputation dataset 3.** (A) The plot showing partial likelihood deviance values  
59 versus  $\log(\lambda)$ . Tuning parameter  $\lambda$  selection used 10-fold cross-validation. The vertical lines  
60 were drawn at optimal values by the minimum criteria and the 1 SE of minimum criteria. The

1  
2  
3 lambda with 1 SE of minimum deviance was used for variable selection. (B) The coefficient  
4 profile plot. The plot was produced against the  $\log(\lambda)$  sequence. LASSO, least absolute  
5 shrinkage and selection operator; SE, standard error.  
6  
7  
8

9  
10 **Supplemental Figure 11. Variable selection by LASSO method for 30-day prognostic**  
11 **model in imputation dataset 4.** (A) The plot showing partial likelihood deviance values  
12 versus  $\log(\lambda)$ . Tuning parameter  $\lambda$  selection used 10-fold cross-validation. The vertical lines  
13 were drawn at optimal values by the minimum criteria and the 1 SE of minimum criteria. The  
14 lambda with 1 SE of minimum deviance was used for variable selection. (B) The coefficient  
15 profile plot. The plot was produced against the  $\log(\lambda)$  sequence. LASSO, least absolute  
16 shrinkage and selection operator; SE, standard error.  
17  
18  
19

20  
21 **Supplemental Figure 12. Variable selection by LASSO method for 30-day prognostic**  
22 **model in imputation dataset 5.** (A) The plot showing partial likelihood deviance values  
23 versus  $\log(\lambda)$ . Tuning parameter  $\lambda$  selection used 10-fold cross-validation. The vertical lines  
24 were drawn at optimal values by the minimum criteria and the 1 SE of minimum criteria. The  
25 lambda with 1 SE of minimum deviance was used for variable selection. (B) The coefficient  
26 profile plot. The plot was produced against the  $\log(\lambda)$  sequence. LASSO, least absolute  
27 shrinkage and selection operator; SE, standard error.  
28  
29  
30

31 **Supplemental Figure 13. Relative importance of selected predictors for 30-day mortality.**  
32 Relative importance of variables selected by LASSO method was ranked according to the  
33 proportion of explainable log-likelihood ratio  $\chi^2$  statistics. LASSO, least absolute shrinkage  
34 and selection operator; Mi, myocardial ischemia; MI, myocardial infarction; PCI,  
35 percutaneous coronary intervention; LVEF, left ventricular ejection fraction; HF, heart failure.  
36  
37  
38  
39

40  
41 **Supplemental Figure 14. Variable selection by LASSO method for 2-year prognostic**  
42 **model in imputation dataset 1.** (A) The plot showing partial likelihood deviance values  
43 versus  $\log(\lambda)$ . Tuning parameter  $\lambda$  selection used 10-fold cross-validation. The vertical lines  
44 were drawn at values by the minimum criteria and the 1 SE of minimum criteria. The lambda  
45 with 1 SE of minimum deviance was used for variable selection. (B) The coefficient profile  
46 plot. The plot was produced against the  $\log(\lambda)$  sequence. LASSO, least absolute shrinkage and  
47 selection operator; SE, standard error.  
48  
49  
50

51  
52 **Supplemental Figure 15. Variable selection by LASSO method for 2-year prognostic**  
53 **model in imputation dataset 2.** (A) The plot showing partial likelihood deviance values  
54 versus  $\log(\lambda)$ . Tuning parameter  $\lambda$  selection used 10-fold cross-validation. The vertical lines  
55 were drawn at values by the minimum criteria and the 1 SE of minimum criteria. The lambda  
56 with 1 SE of minimum deviance was used for variable selection. (B) The coefficient profile  
57 plot. The plot was produced against the  $\log(\lambda)$  sequence. LASSO, least absolute shrinkage and  
58 selection operator; SE, standard error.  
59  
60

1  
2  
3 **Supplemental Figure 16. Variable selection by LASSO method for 2-year prognostic**  
4 **model in imputation dataset 3.** (A) The plot showing partial likelihood deviance values  
5 versus  $\log(\lambda)$ . Tuning parameter  $\lambda$  selection used 10-fold cross-validation. The vertical lines  
6 were drawn at optimal values by the minimum criteria and the 1 SE of minimum criteria. The  
7 lambda with 1 SE of minimum deviance was used for variable selection. (B) The coefficient  
8 profile plot. The plot was produced against the  $\log(\lambda)$  sequence. LASSO, least absolute  
9 shrinkage and selection operator; SE, standard error.  
10  
11  
12  
13

14 **Supplemental Figure 17. Variable selection by LASSO method for 2-year prognostic**  
15 **model in imputation dataset 4.** (A) The plot showing partial likelihood deviance values  
16 versus  $\log(\lambda)$ . Tuning parameter  $\lambda$  selection used 10-fold cross-validation. The vertical lines  
17 were drawn at optimal values by the minimum criteria and the 1 SE of minimum criteria. The  
18 lambda with 1 SE of minimum deviance was used for variable selection. (B) The coefficient  
19 profile plot. The plot was produced against the  $\log(\lambda)$  sequence. LASSO, least absolute  
20 shrinkage and selection operator; SE, standard error.  
21  
22  
23  
24

25 **Supplemental Figure 18. Variable selection by LASSO method for 2-year prognostic**  
26 **model in imputation dataset 5.** (A) The plot showing partial likelihood deviance values  
27 versus  $\log(\lambda)$ . Tuning parameter  $\lambda$  selection used 10-fold cross-validation. The vertical lines  
28 were drawn at optimal values by the minimum criteria and the 1 SE of minimum criteria. The  
29 lambda with 1 SE of minimum deviance was used for variable selection. (B) The coefficient  
30 profile plot. The plot was produced against the  $\log(\lambda)$  sequence. LASSO, least absolute  
31 shrinkage and selection operator; SE, standard error.  
32  
33  
34  
35

36 **Supplemental Figure 19. Relative importance of selected predictors for 2-year mortality.**  
37 Relative importance of variables selected by LASSO method was ranked according to the  
38 proportion of explainable log-likelihood ratio  $\chi^2$  statistics. LASSO, least absolute shrinkage  
39 and selection operator; HF, heart failure; AMI, acute myocardial infarction; LVEF, left  
40 ventricular ejection fraction; PCI, percutaneous coronary intervention.  
41  
42  
43  
44

45 **Supplemental Figure 20. Comparisons of clinical utility between models with or without**  
46 **adverse events and medications.** The red and green lines represent the assumption that all or  
47 none patients at high risk with different thresholds. The lines in the upper right represent the  
48 risk prediction models. (A) Comparison of clinical utility between 30-day model with or  
49 without adverse events and medications. (B) Comparison of clinical utility between 2-year  
50 model with or without adverse events and medications.  
51  
52  
53  
54

55 **Supplemental Figure 21. Comparisons of clinical utility between models with or without**  
56 **hospital level.** The red and green lines represent the assumption that all or none patients at  
57 high risk with different thresholds. The lines in the upper right represent the risk prediction  
58 models. (A) Comparison of clinical utility between 30-day model with or without hospital  
59  
60

1  
2  
3 level. (B) Comparison of clinical utility between 2-year model with or without hospital level.  
4  
5  
6

7 **Supplemental Figure 22. Comparisons of clinical utility between models and GRACE 1.0**  
8 **score.** The red and green lines represent the assumption that all or none patients at high risk  
9 with different thresholds. The lines in the upper right represent the risk prediction models. (A)  
10 Comparison of clinical utility between 30-day model and GRACE 1.0 score. (B) Comparison  
11 of clinical utility between 2-year model and GRACE 1.0 score. GRACE, Global Registry of  
12 Acute Coronary Events.  
13  
14  
15  
16  
17

18 **Supplemental Figure 23. Comparisons of clinical utility between models and GRACE 2.0**  
19 **score.** The red and green lines represent the assumption that all or none patients at high risk  
20 with different thresholds. The lines in the upper right represent the risk prediction models. (A)  
21 Comparison of clinical utility between 30-day model and GRACE 2.0 score. (B) Comparison  
22 of clinical utility between 2-year model and GRACE 2.0 score. GRACE, Global Registry of  
23 Acute Coronary Events.  
24  
25  
26  
27  
28

29 **Supplemental Figure 24. Calibration curves of 30-day prognostic nomogram.** Calibration  
30 curves present the relationship between observed and predicted survival probabilities by 30-  
31 day prognostic nomogram in both derivation and validation cohorts. (A) Calibration curve of  
32 30-day prognostic nomogram in derivation cohort. (B) Calibration curve of 30-day prognostic  
33 nomogram in validation cohort.  
34  
35  
36  
37  
38

39 **Supplemental Figure 25. Calibration curves of 2-year prognostic nomogram.** Calibration  
40 curves present the relationship between observed and predicted survival probabilities by 2-  
41 year prognostic nomogram in both derivation and validation cohorts. (A) Calibration curve of  
42 2-year prognostic nomogram in derivation cohort. (B) Calibration curve of 2-year prognostic  
43 nomogram in validation cohort.  
44  
45  
46  
47  
48  
49  
50  
51  
52  
53  
54  
55  
56  
57  
58  
59  
60

1  
2  
3 **I. Supplemental Tables.**  
4

5 **Supplemental Table 1. Number of missing values for selected predictors in derivation**  
6 **and validation cohorts**  
7

|                                             | Number of missing values (%) |
|---------------------------------------------|------------------------------|
| <b>Derivation cohort</b>                    |                              |
| 30-day prognostic model                     |                              |
| Age                                         | 336 (2.1)                    |
| Prior stroke                                | 820 (5.1)                    |
| Heart rate                                  | 391 (2.5)                    |
| Killip class                                | 395 (2.5)                    |
| LVEF                                        | 3370 (21.2)                  |
| In-hospital PCI                             | 435 (2.7)                    |
| In-hospital recurrent myocardial ischemia   | 518 (3.3)                    |
| In-hospital recurrent myocardial infarction | 518 (3.3)                    |
| In-hospital heart failure                   | 502 (3.2)                    |
| Antiplatelet therapy at discharge           | 849 (5.3)                    |
| Statins at discharge                        | 849 (5.3)                    |
| 2-year prognostic model                     |                              |
| Age                                         | 242 (2.0)                    |
| Prior renal dysfunction                     | 510 (4.2)                    |
| History of heart failure                    | 490 (4.0)                    |
| AMI classification                          | 0 (0.0)                      |
| Heart rate                                  | 107 (0.9)                    |
| Killip class                                | 114 (0.9)                    |
| Hemoglobin                                  | 327 (2.7)                    |
| LVEF                                        | 2307 (19.0)                  |
| In-hospital PCI                             | 130 (1.1)                    |
| In-hospital heart failure                   | 155 (1.3)                    |
| Heart failure worsening within 30 days      | 8 (0.1)                      |
| Antiplatelet therapy within 30 days         | 0 (0.0)                      |
| $\beta$ blockers within 30 days             | 0 (0.0)                      |
| Statins within 30 days                      | 0 (0.0)                      |



**Validation cohort**

## 30-day prognostic model

|                                             |             |
|---------------------------------------------|-------------|
| Age                                         | 144 (1.8)   |
| Prior stroke                                | 404 (5.1)   |
| Heart rate                                  | 197 (2.5)   |
| Killip class                                | 176 (2.2)   |
| LVEF                                        | 1678 (21.1) |
| In-hospital PCI                             | 216 (2.7)   |
| In-hospital recurrent myocardial ischemia   | 267 (3.4)   |
| In-hospital recurrent myocardial infarction | 261 (3.3)   |
| In-hospital heart failure                   | 254 (3.2)   |
| Antiplatelet therapy at discharge           | 416 (5.2)   |
| Statins at discharge                        | 416 (5.2)   |

## 2-year prognostic model

|                                        |             |
|----------------------------------------|-------------|
| Age                                    | 106 (1.7)   |
| Prior renal dysfunction                | 260 (4.3)   |
| History of heart failure               | 254 (4.2)   |
| AMI classification                     | 0 (0.0)     |
| Heart rate                             | 75 (1.2)    |
| Killip class                           | 54 (0.9)    |
| Hemoglobin                             | 135 (2.2)   |
| LVEF                                   | 1161 (19.1) |
| In-hospital PCI                        | 60 (1.0)    |
| In-hospital heart failure              | 83 (1.4)    |
| Heart failure worsening within 30 days | 9 (0.1)     |
| Antiplatelet therapy within 30 days    | 0 (0.0)     |
| $\beta$ blockers within 30 days        | 0 (0.0)     |
| Statins within 30 days                 | 0 (0.0)     |

---

LVEF, left ventricular ejection fraction; PCI, percutaneous coronary intervention; AMI, acute myocardial infarction.

**Supplemental Table 2. Baseline characteristics, medications, and outcomes of cohorts for developing and validating 30-day prognostic model**

| Variables                         | Derivation cohort<br>(n=15925) | Validation cohort<br>(n=7962) |
|-----------------------------------|--------------------------------|-------------------------------|
| <b>Demographics</b>               |                                |                               |
| Age, yrs                          | 62.27±12.36                    | 62.54±12.29                   |
| Female                            | 3878 (24.4)                    | 1940 (24.4)                   |
| BMI, kg/m <sup>2</sup>            | 24.13±3.05                     | 24.08±3.04                    |
| <b>Medical history</b>            |                                |                               |
| Diabetes                          | 2943 (19.6)                    | 1505 (20.0)                   |
| Hypertension                      | 7873 (51.2)                    | 3897 (50.8)                   |
| Hyperlipidemia                    | 1154 (8.5)                     | 569 (8.3)                     |
| Current smoker                    | 7083 (45.7)                    | 3483 (44.8)                   |
| Prior angina pectoris             | 4044 (27.8)                    | 1994 (27.4)                   |
| Prior myocardial infarction       | 1083 (7.4)                     | 553 (7.5)                     |
| Prior heart failure               | 329 (2.2)                      | 169 (2.3)                     |
| Prior stroke                      | 1330 (8.8)                     | 711 (9.4)                     |
| Prior peripheral artery disease   | 96 (0.6)                       | 46 (0.6)                      |
| Prior PCI                         | 753 (5.0)                      | 381 (5.1)                     |
| Prior CABG                        | 56 (0.4)                       | 36 (0.5)                      |
| Prior renal dysfunction           | 197 (1.3)                      | 94 (1.3)                      |
| COPD                              | 279 (1.9)                      | 142 (1.9)                     |
| <b>Presenting characteristics</b> |                                |                               |
| Symptom onset to admission time   |                                |                               |
| 0-6h                              | 7398 (47.0)                    | 3625 (46.0)                   |
| >6h                               | 8330 (53.0)                    | 4247 (54.0)                   |
| Heart rate, beats/min             | 77±18                          | 78±18                         |
| Systolic blood pressure           | 129.48±25.01                   | 129.94±25.26                  |
| Killip class                      |                                |                               |
| I                                 | 11836 (76.2)                   | 5903 (75.8)                   |
| II-IV                             | 3694 (23.8)                    | 1883 (24.2)                   |
| Cardiac arrest at admission       | 128 (0.8)                      | 77 (1.0)                      |

1  
2  
3  
4  
5  
6  
7  
8  
9  
10  
11  
12  
13  
14  
15  
16  
17  
18  
19  
20  
21  
22  
23  
24  
25  
26  
27  
28  
29  
30  
31  
32  
33  
34  
35  
36  
37  
38  
39  
40  
41  
42  
43  
44  
45  
46  
47  
48  
49  
50  
51  
52  
53  
54  
55  
56  
57  
58  
59  
60

|                                              |                       |                       |
|----------------------------------------------|-----------------------|-----------------------|
| <b>AMI classification</b>                    |                       |                       |
| STEMI                                        | 12051 (75.7)          | 5991 (75.2)           |
| NSTEMI                                       | 3874 (24.3)           | 1971 (24.8)           |
| Anterior wall involvement                    | 7406 (47.7)           | 3696 (47.5)           |
| <b>Laboratory results</b>                    |                       |                       |
| Creatinine, $\mu\text{mol/L}$                | 74.90 (62.00, 90.00)  | 74.60 (62.00, 90.40)  |
| Creatinine clearance, ml/min                 | 83.83 (61.61, 109.00) | 83.70 (61.52, 108.71) |
| Hemoglobin, g/L                              | 136.23 $\pm$ 21.09    | 136.07 $\pm$ 20.94    |
| Leukocyte count, $\times 10^9/\text{L}$      | 10.09 $\pm$ 3.69      | 10.04 $\pm$ 3.60      |
| LVEF, %                                      | 53.84 $\pm$ 10.07     | 53.81 $\pm$ 10.08     |
| <b>In-hospital treatment</b>                 |                       |                       |
| PCI                                          | 8951 (57.9)           | 4432 (57.2)           |
| CABG                                         | 127 (0.8)             | 76 (1.0)              |
| <b>Adverse events during hospitalization</b> |                       |                       |
| New-onset heart failure                      | 2082 (13.5)           | 1035 (13.4)           |
| Recurrent myocardial ischemia                | 384 (2.5)             | 166 (2.2)             |
| Recurrent myocardial infarction              | 61 (0.4)              | 22 (0.3)              |
| Stroke                                       | 90 (0.6)              | 40 (0.5)              |
| Other bleeding events                        | 236 (1.5)             | 121 (1.6)             |
| <b>Medications at discharge</b>              |                       |                       |
| Antiplatelet therapy                         |                       |                       |
| Dual antiplatelet therapy                    | 13212 (87.6)          | 6571 (87.1)           |
| Single antiplatelet therapy                  | 1261 (8.4)            | 648 (8.6)             |
| None                                         | 603 (4.0)             | 327 (4.3)             |
| Statins                                      | 13846 (91.8)          | 6976 (92.4)           |
| $\beta$ blockers                             | 10341 (68.6)          | 5006 (66.3)           |
| ACEI/ARB                                     | 8642 (57.3)           | 4326 (57.3)           |
| <b>Hospital level</b>                        |                       |                       |
| Province level                               | 5516 (34.6)           | 2728 (34.3)           |
| Prefecture level                             | 8740 (54.9)           | 4371 (54.9)           |
| County level                                 | 1668 (10.5)           | 863 (10.8)            |

Values are shown as mean  $\pm$  standard deviation, median (interquartile range), or number (%)

1  
2  
3 without imputation of missing data. BMI, body mass index; PCI, percutaneous coronary  
4 intervention; CABG, coronary artery bypass graft; COPD, chronic obstructive pulmonary  
5 disease; AMI, acute myocardial infarction; STEMI, ST-segment elevation myocardial  
6 infarction; NSTEMI, non-ST-segment elevation myocardial infarction; LVEF, left ventricular  
7 ejection fraction; ACEI, angiotensin converting enzyme inhibitor; ARB, angiotensin II  
8 receptor blocker.  
9  
10  
11  
12  
13  
14  
15  
16  
17  
18  
19  
20  
21  
22  
23  
24  
25  
26  
27  
28  
29  
30  
31  
32  
33  
34  
35  
36  
37  
38  
39  
40  
41  
42  
43  
44  
45  
46  
47  
48  
49  
50  
51  
52  
53  
54  
55  
56  
57  
58  
59  
60

**Supplemental Table 3. Baseline characteristics, medications, and outcomes of cohorts for developing and validating 2-year prognostic model**

| Variables                         | Derivation cohort (n=12136) | Validation cohort (n=6067) |
|-----------------------------------|-----------------------------|----------------------------|
| <b>Demographics</b>               |                             |                            |
| Age, yrs                          | 62.08±12.28                 | 62.26±12.20                |
| Female                            | 2967 (24.4)                 | 1459 (24.0)                |
| BMI, kg/m <sup>2</sup>            | 24.12±3.02                  | 24.11±3.01                 |
| <b>Medical history</b>            |                             |                            |
| Diabetes                          | 2213 (19.0)                 | 1146 (19.6)                |
| Hypertension                      | 6021 (50.6)                 | 3011 (50.7)                |
| Hyperlipidemia                    | 760 (7.2)                   | 382 (7.2)                  |
| Current smoker                    | 5565 (46.3)                 | 2737 (45.5)                |
| Prior angina pectoris             | 3173 (28.0)                 | 1571 (27.8)                |
| Prior myocardial infarction       | 821 (7.2)                   | 420 (7.3)                  |
| Prior heart failure               | 243 (2.1)                   | 120 (2.1)                  |
| Prior stroke                      | 1038 (8.8)                  | 572 (9.7)                  |
| Prior peripheral artery disease   | 72 (0.6)                    | 30 (0.5)                   |
| Prior PCI                         | 562 (4.8)                   | 293 (5.0)                  |
| Prior CABG                        | 38 (0.3)                    | 25 (0.4)                   |
| Prior renal dysfunction           | 130 (1.1)                   | 56 (1.0)                   |
| COPD                              | 221 (1.9)                   | 114 (2.0)                  |
| <b>Presenting characteristics</b> |                             |                            |
| Symptom onset to admission time   |                             |                            |
| 0-6h                              | 5725 (47.6)                 | 2798 (46.5)                |
| >6h                               | 6298 (52.4)                 | 3216 (53.5)                |
| Heart rate, beats/min             | 77±18                       | 78±18                      |
| Systolic blood pressure           | 129.61±25.30                | 130.00±25.52               |
| Killip class                      |                             |                            |
| I                                 | 9163 (76.2)                 | 4589 (76.3)                |
| II-IV                             | 2859 (23.8)                 | 1424 (23.7)                |
| Cardiac arrest at admission       | 95 (0.8)                    | 62 (1.0)                   |
| AMI classification                |                             |                            |

|                                              |                       |                       |
|----------------------------------------------|-----------------------|-----------------------|
| STEMI                                        | 9215 (75.9)           | 4560 (75.2)           |
| NSTEMI                                       | 2921 (24.1)           | 1507 (24.8)           |
| Anterior wall involvement                    | 5743 (47.7)           | 2843 (47.2)           |
| <b>Laboratory results</b>                    |                       |                       |
| Creatinine, $\mu\text{mol/L}$                | 74.00 (61.80, 89.10)  | 73.90 (61.40, 89.60)  |
| Creatinine clearance, ml/min                 | 84.53 (62.60, 109.58) | 84.92 (63.22, 110.16) |
| Hemoglobin, g/L                              | 136.37 $\pm$ 20.82    | 136.39 $\pm$ 20.79    |
| Leukocyte count, $\times 10^9/\text{L}$      | 10.09 $\pm$ 3.65      | 10.02 $\pm$ 3.52      |
| LVEF, %                                      | 54.08 $\pm$ 10.00     | 54.01 $\pm$ 9.94      |
| <b>In-hospital treatment</b>                 |                       |                       |
| In-hospital PCI                              | 6998 (58.4)           | 3468 (57.7)           |
| In-hospital CABG                             | 87 (0.7)              | 50 (0.8)              |
| <b>Adverse events during hospitalization</b> |                       |                       |
| New-onset heart failure                      | 1616 (13.5)           | 805 (13.5)            |
| Recurrent myocardial ischemia                | 281 (2.3)             | 125 (2.1)             |
| Recurrent myocardial infarction              | 37 (0.3)              | 18 (0.3)              |
| Stroke                                       | 65 (0.5)              | 29 (0.5)              |
| Other bleeding events                        | 183 (1.5)             | 94 (1.6)              |
| <b>Medications within 30 days</b>            |                       |                       |
| Antiplatelet therapy                         |                       |                       |
| Dual antiplatelet therapy                    | 10518 (86.7)          | 5287 (87.1)           |
| Single antiplatelet therapy                  | 1292 (10.6)           | 610 (10.1)            |
| None                                         | 326 (2.7)             | 170 (2.8)             |
| Statins                                      | 11486 (94.6)          | 5736 (94.5)           |
| $\beta$ blockers                             | 8751 (72.1)           | 4347 (71.6)           |
| ACEI/ARB                                     | 7221 (59.5)           | 3591 (59.2)           |
| <b>Hospital level</b>                        |                       |                       |
| Province level                               | 3876 (31.9)           | 1956 (32.2)           |
| Prefecture level                             | 6947 (57.2)           | 3461 (57.0)           |
| County level                                 | 1313 (10.8)           | 650 (10.7)            |

Values are shown as mean  $\pm$  standard deviation, median (interquartile range), or number (%) without imputation of missing data. BMI, body mass index; PCI, percutaneous coronary

1  
2  
3 intervention; CABG, coronary artery bypass graft; COPD, chronic obstructive pulmonary  
4 disease; AMI, acute myocardial infarction; STEMI, ST-segment elevation myocardial  
5 infarction; NSTEMI, non-ST-segment elevation myocardial infarction; LVEF, left ventricular  
6 ejection fraction; ACEI, angiotensin converting enzyme inhibitor; ARB, angiotensin II  
7 receptor blocker.  
8  
9

**Supplemental Table 4. Univariable analysis of 30-day mortality**

|                                                   | <b>Unadjusted HR (95% CI)</b> | <b>P value</b> |
|---------------------------------------------------|-------------------------------|----------------|
| Age (per 1 year increase)                         | 1.066 (1.052, 1.080)          | <0.0001        |
| Women (vs men)                                    | 1.662 (1.233, 2.241)          | 0.0009         |
| BMI (per 1kg/m <sup>2</sup> increase)             | 0.893 (0.850, 0.939)          | <0.0001        |
| Diabetes (vs no)                                  | 1.545 (1.123, 2.126)          | 0.0075         |
| Hypertension (vs no)                              | 1.289 (0.958, 1.734)          | 0.0930         |
| Hyperlipidemia (vs no)                            | 0.749 (0.406, 1.384)          | 0.3547         |
| Current smoking (vs no)                           | 0.406 (0.293, 0.563)          | <0.0001        |
| Prior angina pectoris (vs no)                     | 1.324 (0.972, 1.803)          | 0.0754         |
| Prior myocardial infarction (vs no)               | 1.177 (0.709, 1.954)          | 0.5284         |
| Prior heart failure (vs no)                       | 5.078 (3.166, 8.144)          | <0.0001        |
| Prior stroke (vs no)                              | 2.627 (1.842, 3.747)          | <0.0001        |
| Prior PCI (vs no)                                 | 0.814 (0.400, 1.659)          | 0.5717         |
| Prior CABG (vs no)                                | —                             | —              |
| Prior renal dysfunction (vs no)                   | 1.596 (0.587, 4.338)          | 0.3591         |
| COPD (vs no)                                      | 3.208 (1.744, 5.901)          | 0.0002         |
| Prior peripheral artery disease (vs no)           | —                             | —              |
| Symptom onset to admission time (vs 0-6h)         |                               |                |
| >6h                                               | 1.947 (1.431, 2.649)          | <0.0001        |
| Heart rate (per 1 beat increase)                  | 1.024 (1.018, 1.029)          | <0.0001        |
| Systolic blood pressure (per 1mmHg increase)      | 0.994 (0.988, 1.000)          | 0.0358         |
| Killip class (vs I)                               |                               |                |
| II-IV                                             | 3.980 (2.990, 5.298)          | <0.0001        |
| Cardiac arrest at admission (vs no)               | 1.921 (0.614, 6.011)          | 0.2620         |
| NSTEMI (vs STEMI)                                 | 1.230 (0.898, 1.686)          | 0.1977         |
| Anterior wall involvement (vs no)                 | 1.255 (0.943, 1.671)          | 0.1185         |
| Creatinine clearance (vs >90 ml/min)              |                               |                |
| 60-90                                             | 1.805 (1.222, 2.666)          | 0.0030         |
| ≤60                                               | 4.252 (2.985, 6.058)          | <0.0001        |
| Hemoglobin (per 1g/L increase)                    | 0.988 (0.983, 0.993)          | <0.0001        |
| Leukocyte count (per 10 <sup>9</sup> /L increase) | 1.055 (1.023, 1.088)          | 0.0006         |



|    |                                                                |                        |         |
|----|----------------------------------------------------------------|------------------------|---------|
| 1  |                                                                |                        |         |
| 2  |                                                                |                        |         |
| 3  | LVEF (per 1% increase)                                         | 0.938 (0.923, 0.952)   | <0.0001 |
| 4  |                                                                |                        |         |
| 5  | In-hospital PCI (vs no)                                        | 0.220 (0.157, 0.308)   | <0.0001 |
| 6  |                                                                |                        |         |
| 7  | In-hospital CABG (vs no)                                       | 1.277 (0.317, 5.145)   | 0.7308  |
| 8  |                                                                |                        |         |
| 9  | New-onset heart failure during hospitalization (vs no)         | 7.204 (5.414, 9.585)   | <0.0001 |
| 10 |                                                                |                        |         |
| 11 | Recurrent myocardial ischemia during hospitalization (vs no)   | 6.028 (3.938, 9.228)   | <0.0001 |
| 12 |                                                                |                        |         |
| 13 | Recurrent myocardial infarction during hospitalization (vs no) | 13.299 (6.752, 26.195) | <0.0001 |
| 14 |                                                                |                        |         |
| 15 |                                                                |                        |         |
| 16 | Stroke during hospitalization (vs no)                          | 2.908 (0.934, 9.052)   | 0.0654  |
| 17 |                                                                |                        |         |
| 18 | Other bleeding events during hospitalization (vs no)           | 4.109 (2.235, 7.558)   | <0.0001 |
| 19 |                                                                |                        |         |
| 20 | Antiplatelet therapy at discharge (vs dual therapy)            |                        |         |
| 21 |                                                                |                        |         |
| 22 | Single antiplatelet therapy                                    | 1.344 (0.762, 2.372)   | 0.3024  |
| 23 |                                                                |                        |         |
| 24 | none                                                           | 5.158 (3.468, 7.672)   | <0.0001 |
| 25 |                                                                |                        |         |
| 26 | Statins at discharge (vs no)                                   | 3.180 (2.246, 4.502)   | <0.0001 |
| 27 |                                                                |                        |         |
| 28 | $\beta$ blockers at discharge (vs no)                          | 1.483 (1.105, 1.991)   | 0.0087  |
| 29 |                                                                |                        |         |
| 30 | ACEI/ARB at discharge (vs no)                                  | 1.481 (1.088, 2.017)   | 0.0128  |

BMI, body mass index; PCI, percutaneous coronary intervention; CABG, coronary artery bypass graft; COPD, chronic obstructive pulmonary disease; NSTEMI, non-ST-segment elevation myocardial infarction; STEMI, ST-segment elevation myocardial infarction; LVEF, left ventricular ejection fraction; ACEI, angiotensin converting enzyme inhibitor; ARB, angiotensin II receptor blocker; HR, hazard ratio; CI, confidence interval.

**Supplemental Table 5. Univariable analysis of mortality after 30 days**

|                                                   | <b>Unadjusted HR (95% CI)</b> | <b>P value</b> |
|---------------------------------------------------|-------------------------------|----------------|
| Age (per 1 year increase)                         | 1.084 (1.076, 1.092)          | <0.0001        |
| Women (vs men)                                    | 1.947 (1.679, 2.259)          | <0.0001        |
| BMI (per 1kg/m <sup>2</sup> increase)             | 0.895 (0.872, 0.919)          | <0.0001        |
| Diabetes (vs no)                                  | 1.571 (1.328, 1.857)          | <0.0001        |
| Hypertension (vs no)                              | 1.533 (1.321, 1.779)          | <0.0001        |
| Hyperlipidemia (vs no)                            | 0.631 (0.443, 0.900)          | 0.0111         |
| Current smoking (vs no)                           | 0.423 (0.359, 0.498)          | <0.0001        |
| Prior angina pectoris (vs no)                     | 1.318 (1.131, 1.536)          | 0.0004         |
| Prior myocardial infarction (vs no)               | 2.064 (1.657, 2.570)          | <0.0001        |
| Prior heart failure (vs no)                       | 5.964 (4.685, 7.594)          | <0.0001        |
| Prior stroke (vs no)                              | 2.013 (1.651, 2.455)          | <0.0001        |
| Prior PCI (vs no)                                 | 1.122 (0.817, 1.540)          | 0.4770         |
| Prior CABG (vs no)                                | 1.656 (0.618, 4.433)          | 0.3156         |
| Prior renal dysfunction (vs no)                   | 4.383 (2.969, 6.470)          | <0.0001        |
| COPD (vs no)                                      | 2.897 (2.076, 4.044)          | <0.0001        |
| Prior peripheral artery disease (vs no)           | 2.273 (1.197, 4.314)          | 0.0122         |
| Symptom onset to admission time (vs 0-6h)         |                               |                |
| >6h                                               | 1.497 (1.287, 1.742)          | <0.0001        |
| Heart rate (per 1 beat increase)                  | 1.021 (1.018, 1.024)          | <0.0001        |
| Systolic blood pressure (per 1mmHg increase)      | 1.005 (1.002, 1.008)          | 0.0005         |
| Killip class (vs I)                               |                               |                |
| II-IV                                             | 3.225 (2.792, 3.726)          | <0.0001        |
| Cardiac arrest at admission (vs no)               | 1.068 (0.478, 2.388)          | 0.8724         |
| NSTEMI (vs STEMI)                                 | 2.395 (2.070, 2.771)          | <0.0001        |
| Anterior wall involvement (vs no)                 | 1.210 (1.047, 1.398)          | 0.0096         |
| Creatinine clearance (vs >90 ml/min)              |                               |                |
| 60-90                                             | 1.725 (1.405, 2.119)          | <0.0001        |
| ≤60                                               | 5.193 (4.328, 6.231)          | <0.0001        |
| Hemoglobin (per 1g/L increase)                    | 0.980 (0.978, 0.983)          | <0.0001        |
| Leukocyte count (per 10 <sup>9</sup> /L increase) | 1.010 (0.990, 1.030)          | 0.3333         |

1  
2  
3  
4  
5  
6  
7  
8  
9  
10  
11  
12  
13  
14  
15  
16  
17  
18  
19  
20  
21  
22  
23  
24  
25  
26  
27  
28  
29  
30  
31  
32  
33  
34  
35  
36  
37  
38  
39  
40  
41  
42  
43  
44  
45  
46  
47  
48  
49  
50  
51  
52  
53  
54  
55  
56  
57  
58  
59  
60

|                                                                    |                      |         |
|--------------------------------------------------------------------|----------------------|---------|
| LVEF (per 1% increase)                                             | 0.948 (0.941, 0.955) | <0.0001 |
| In-hospital PCI (vs no)                                            | 0.207 (0.175, 0.246) | <0.0001 |
| In-hospital CABG (vs no)                                           | 0.421 (0.106, 1.674) | 0.2184  |
| New-onset heart failure during hospitalization (vs no)             | 3.418 (2.932, 3.984) | <0.0001 |
| Recurrent myocardial ischemia during hospitalization (vs no)       | 2.653 (1.949, 3.610) | <0.0001 |
| Recurrent myocardial infarction during hospitalization (vs no)     | 1.773 (0.659, 4.771) | 0.2565  |
| Stroke during hospitalization (vs no)                              | 3.455 (1.991, 5.996) | <0.0001 |
| Other bleeding events during hospitalization (vs no)               | 2.233 (1.486, 3.356) | 0.0001  |
| Recurrent myocardial infarction within 30 days (vs no)             | 3.032 (1.130-8.134)  | 0.0276  |
| Heart failure worsening within 30 days (vs no)                     | 4.790 (3.631, 6.319) | <0.001  |
| Antiplatelet therapy within 30 days (vs dual antiplatelet therapy) |                      |         |
| Single antiplatelet therapy                                        | 2.147 (1.779, 2.591) | <0.0001 |
| none                                                               | 4.371 (3.385, 5.643) | <0.0001 |
| Statins within 30 days (vs no)                                     | 2.454 (1.960, 3.073) | <0.0001 |
| $\beta$ blockers within 30 days (vs no)                            | 1.594 (1.374, 1.850) | <0.0001 |
| ACEI/ARB within 30 days (vs no)                                    | 1.153 (0.997, 1.333) | 0.0546  |

---

BMI, body mass index; PCI, percutaneous coronary intervention; CABG, coronary artery bypass graft; COPD, chronic obstructive pulmonary disease; NSTEMI, non-ST-segment elevation myocardial infarction; STEMI, ST-segment elevation myocardial infarction; LVEF, left ventricular ejection fraction; ACEI, angiotensin converting enzyme inhibitor; ARB, angiotensin II receptor blocker; HR, hazard ratio; CI, confidence interval.

**Supplemental Table 6. Discrimination of 30-day prognostic nomogram in subgroups of patients**

| Subgroup         | Sample size | C statistic (95% CI) |
|------------------|-------------|----------------------|
| Age, yrs         |             |                      |
| ≤75              | 4766        | 0.74 (0.65-0.84)     |
| >75              | 935         | 0.83 (0.71-0.94)     |
| Sex              |             |                      |
| Male             | 4359        | 0.79 (0.69-0.88)     |
| Female           | 1342        | 0.75 (0.62-0.88)     |
| Diabetes         |             |                      |
| Yes              | 1106        | 0.81 (0.62-1.00)     |
| No               | 4431        | 0.78 (0.70-0.87)     |
| Diagnosis        |             |                      |
| STEMI            | 4302        | 0.77 (0.68-0.86)     |
| NSTEMI           | 1399        | 0.83 (0.72-0.93)     |
| In-hospital PCI  |             |                      |
| Yes              | 3498        | 0.76 (0.63-0.88)     |
| No               | 2203        | 0.76 (0.66-0.85)     |
| Hospital level   |             |                      |
| Province level   | 1984        | 0.78 (0.66-0.90)     |
| Prefecture level | 3168        | 0.80 (0.70-0.90)     |
| County level     | 549         | 0.74 (0.51-0.97)     |

STEMI, ST-segment elevation myocardial infarction; NSTEMI, non-ST-segment elevation myocardial infarction; PCI, percutaneous coronary intervention; CI, confidence interval.

**Supplemental Table 7. Discrimination of 2-year prognostic nomogram in subgroups of patients**

| Subgroup           | Sample size | C statistic (95% CI) |
|--------------------|-------------|----------------------|
| Age, yrs           |             |                      |
| ≤75                | 3766        | 0.79 (0.75-0.83)     |
| >75                | 695         | 0.66 (0.62-0.71)     |
| Sex                |             |                      |
| Male               | 3412        | 0.83 (0.80-0.86)     |
| Female             | 1049        | 0.75 (0.70-0.80)     |
| Diabetes           |             |                      |
| Yes                | 845         | 0.81 (0.76-0.86)     |
| No                 | 3496        | 0.81 (0.78-0.84)     |
| AMI classification |             |                      |
| STEMI              | 3364        | 0.81 (0.78-0.84)     |
| NSTEMI             | 1097        | 0.81 (0.76-0.85)     |
| In-hospital PCI    |             |                      |
| Yes                | 3104        | 0.82 (0.78-0.87)     |
| No                 | 1357        | 0.72 (0.68-0.76)     |
| Hospital level     |             |                      |
| Province level     | 1460        | 0.83 (0.78-0.88)     |
| Prefecture level   | 2552        | 0.81 (0.77-0.84)     |
| County level       | 449         | 0.78 (0.70-0.85)     |

AMI, acute myocardial infarction; STEMI, ST-segment elevation myocardial infarction; NSTEMI, non-ST-segment elevation myocardial infarction; PCI, percutaneous coronary intervention; CI, confidence interval.

## II. Supplemental Figures.

### Supplemental Figure 1. Flowchart of this study

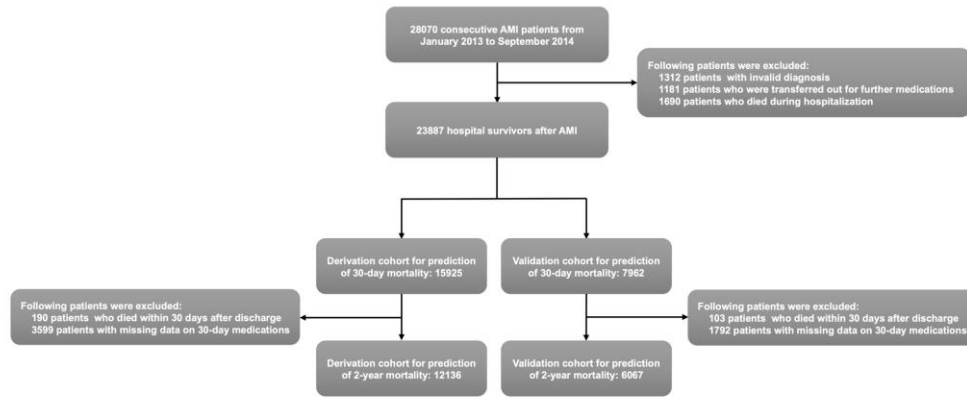

**Supplemental Figure 2. Martingale residual plots for testing the linearity assumption before developing the 30-day model**

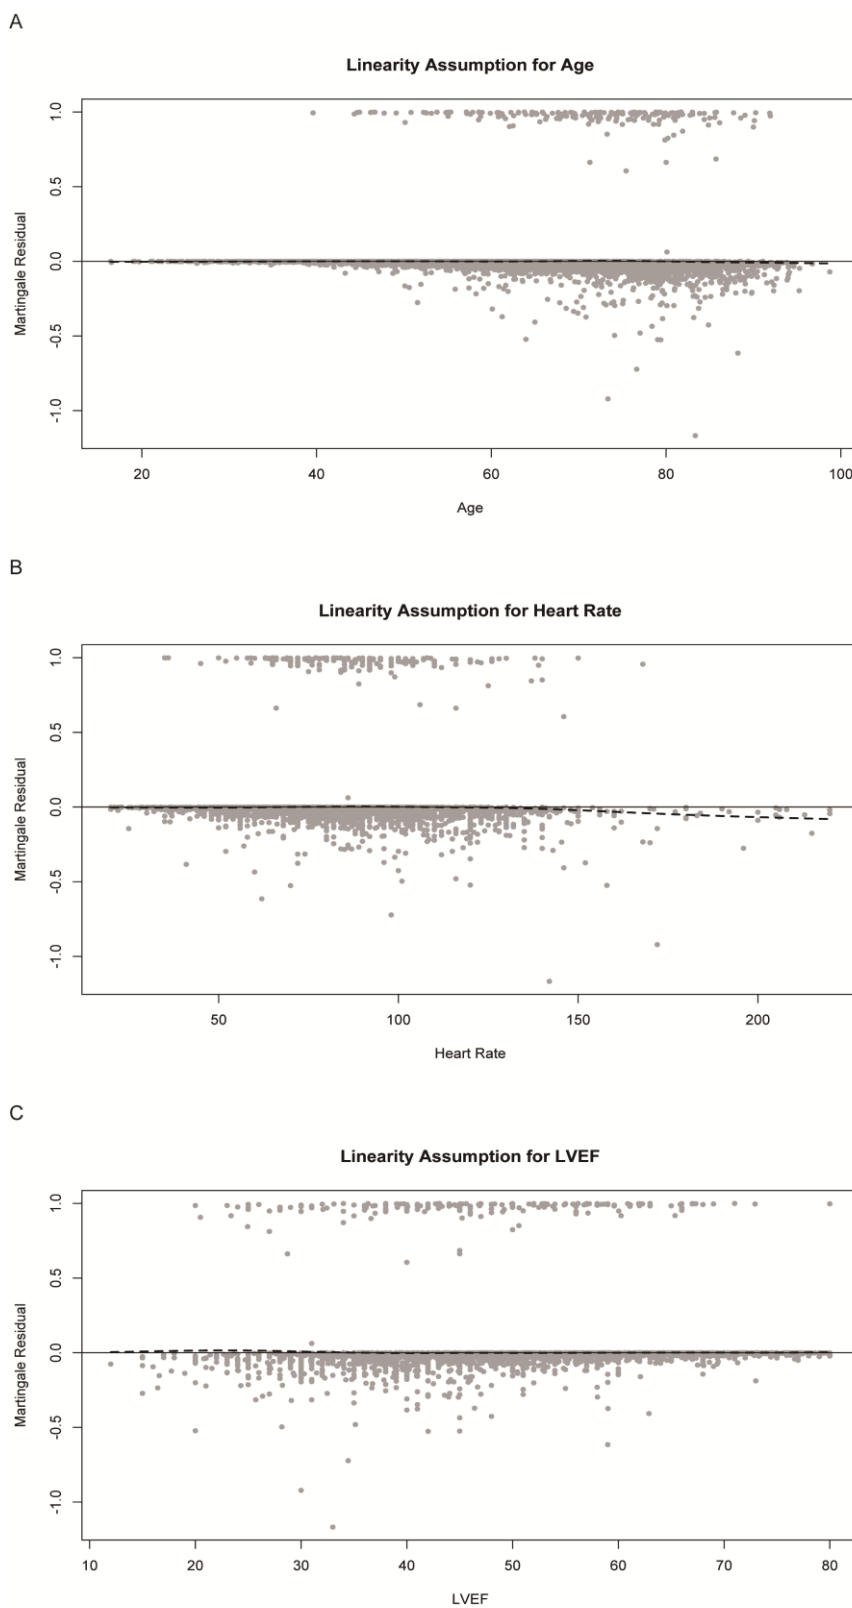

1  
2  
3  
4  
5  
6  
7  
8  
9  
10  
11  
12  
13  
14  
15  
16  
17  
18  
19  
20  
21  
22  
23  
24  
25  
26  
27  
28  
29  
30  
31  
32  
33  
34  
35  
36  
37  
38  
39  
40  
41  
42  
43  
44  
45  
46  
47  
48  
49  
50  
51  
52  
53  
54  
55  
56  
57  
58  
59  
60



**Supplemental Figure 3. Martingale residual plots for testing the linearity assumption before developing the 2-year model**

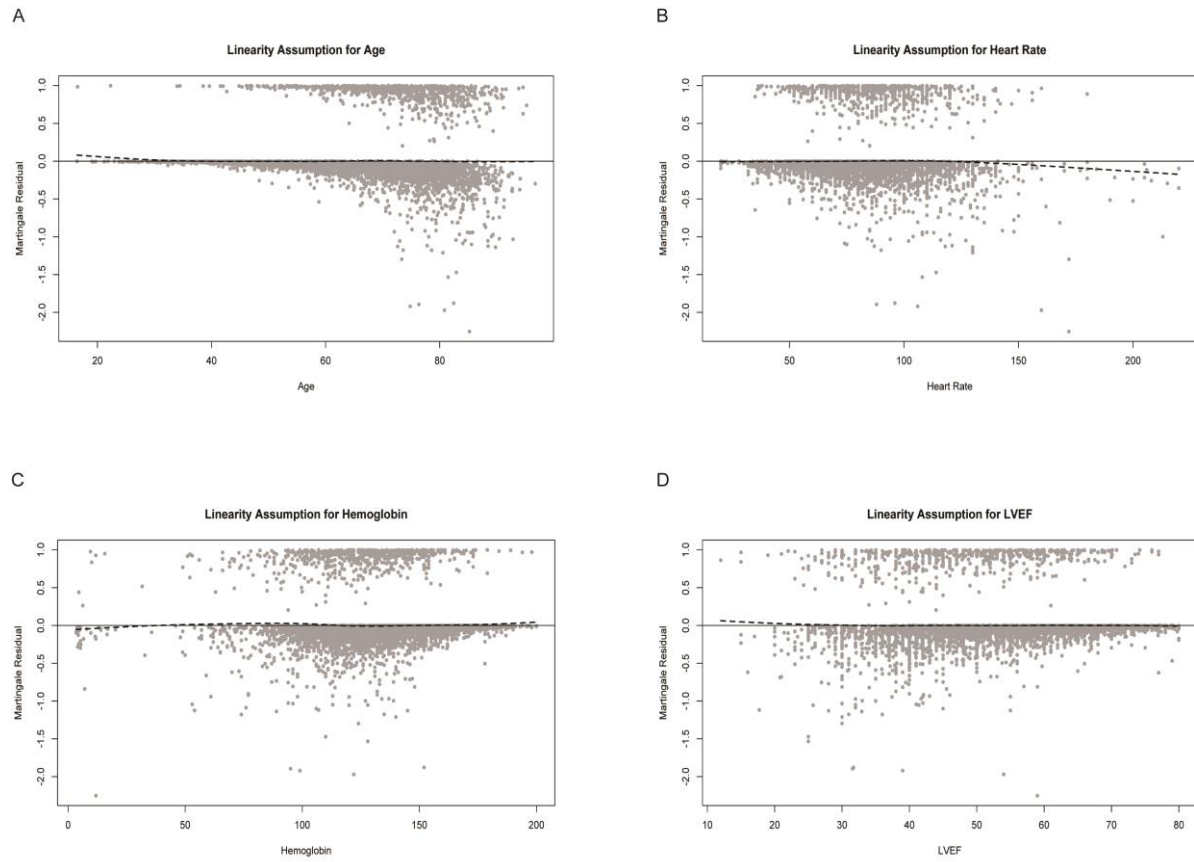

### Supplemental Figure 4. Schoenfeld residual plots for testing the proportional hazards assumption before developing the 30-day model

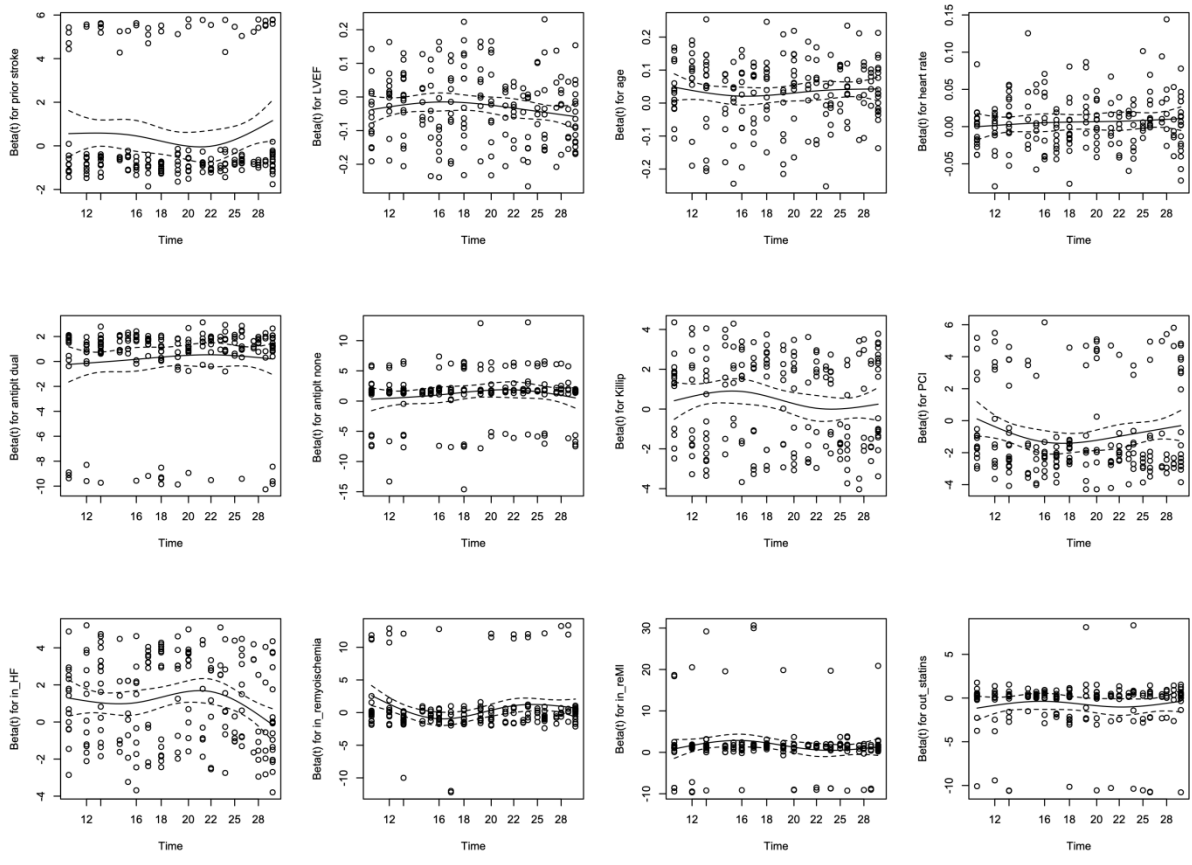

Supplemental Figure 5. Schoenfeld residual plots for testing the proportional hazards assumption before developing the 2-year model

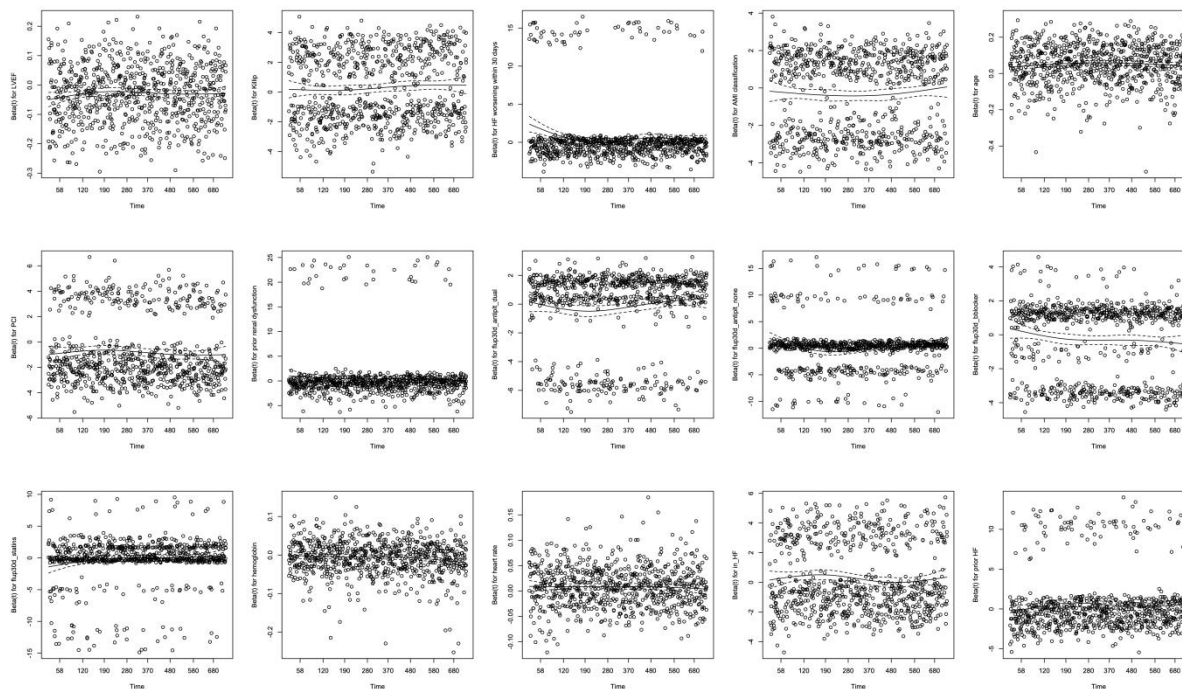

### Supplemental Figure 6. Kaplan-Meier curve for patients after AMI hospitalization

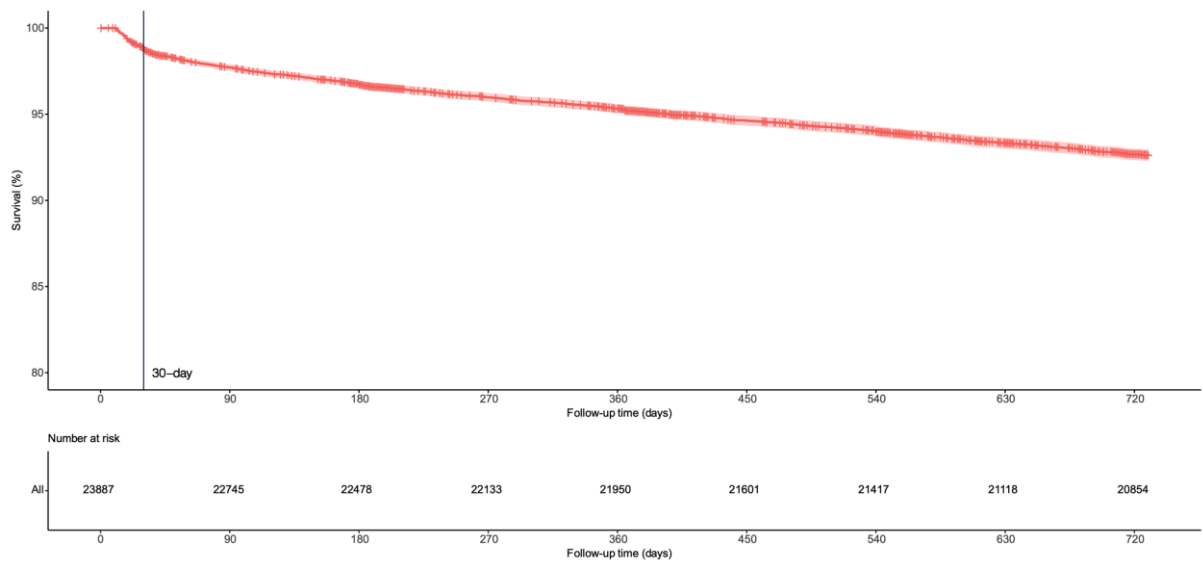

**Supplemental Figure 7. Density plots for all-cause death and recurrent myocardial infarction during follow-up**

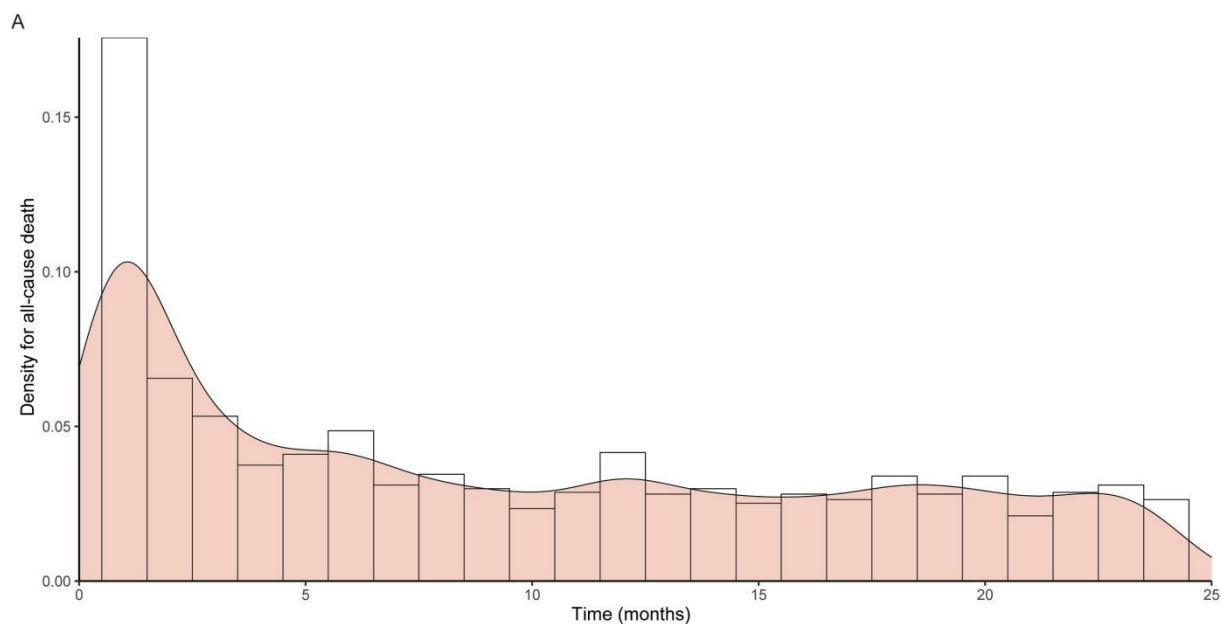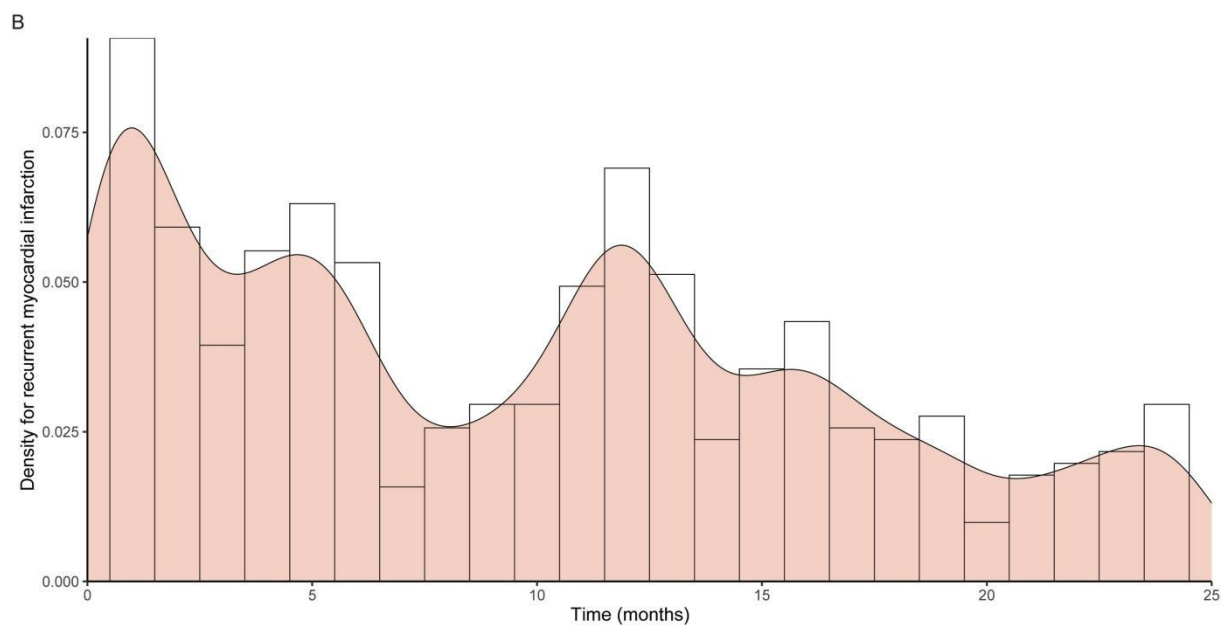

### Supplemental Figure 8. Variable selection by LASSO method for 30-day prognostic model in imputation dataset 1

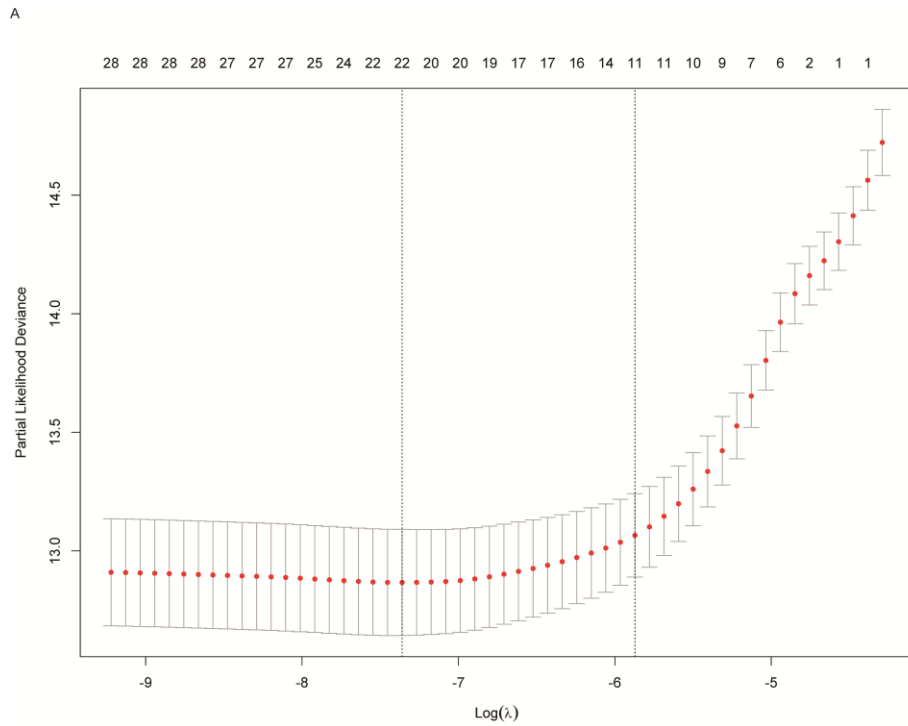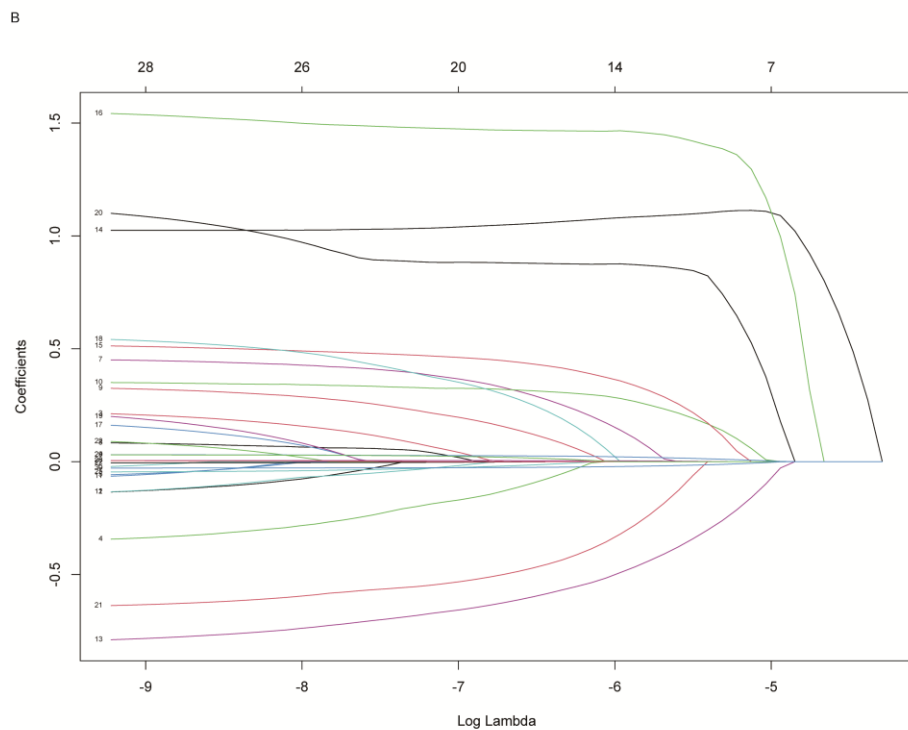

**Supplemental Figure 9. Variable selection by LASSO method for 30-day prognostic model in imputation dataset 2**

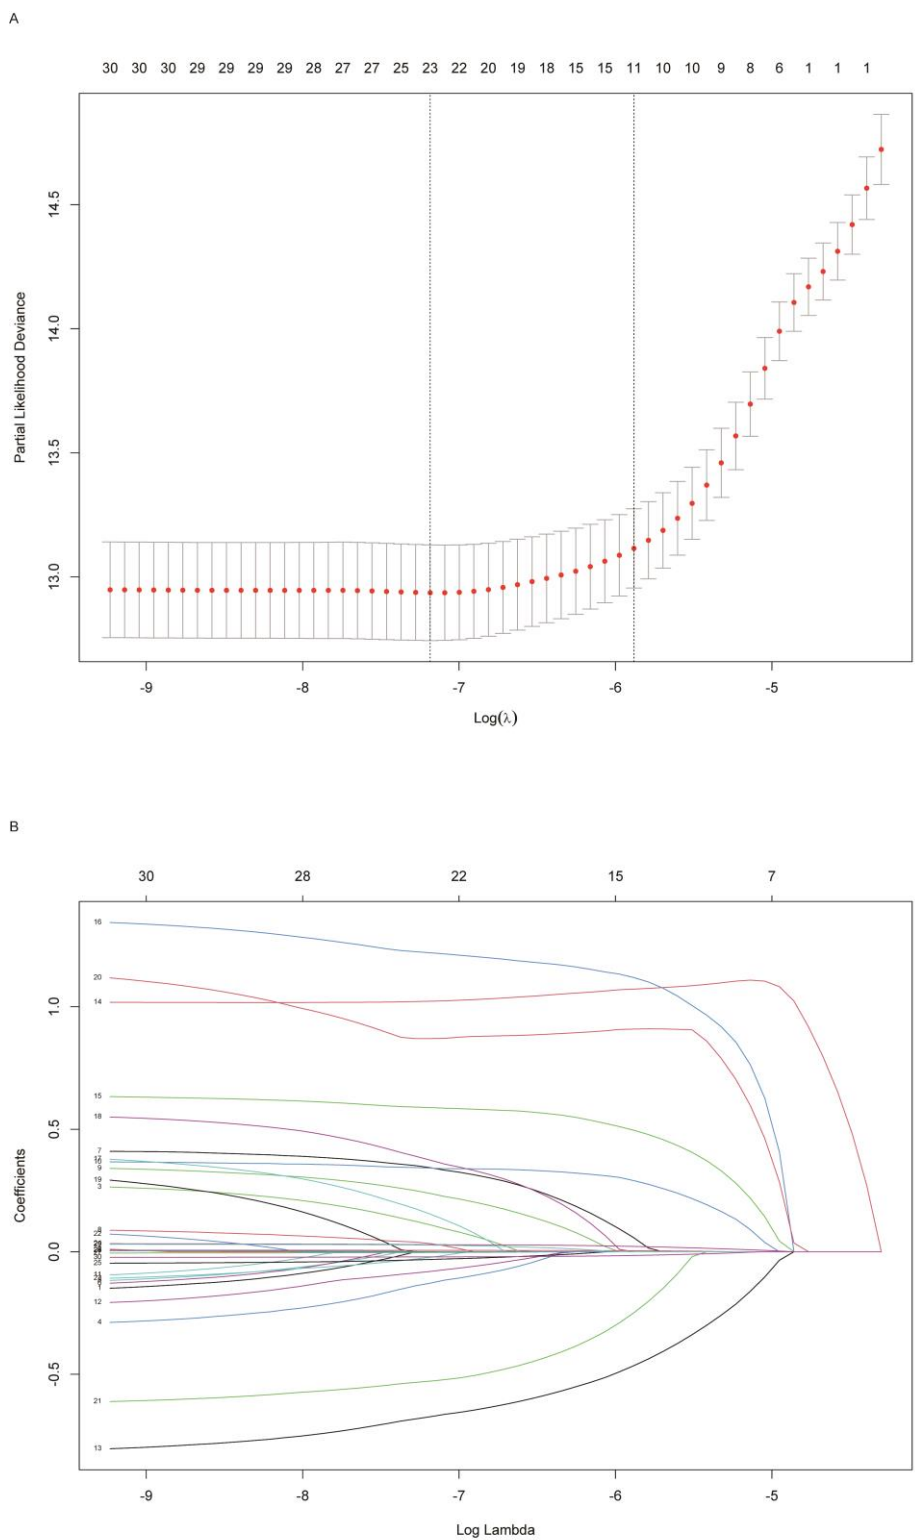

**Supplemental Figure 10. Variable selection by LASSO method for 30-day prognostic model in imputation dataset 3**

1  
2  
3  
4  
5  
6  
7  
8  
9  
10  
11  
12  
13  
14  
15  
16  
17  
18  
19  
20  
21  
22  
23  
24  
25  
26  
27  
28  
29  
30  
31  
32  
33  
34  
35  
36  
37  
38  
39  
40  
41  
42  
43  
44  
45  
46  
47  
48  
49  
50  
51  
52  
53  
54  
55  
56  
57  
58  
59  
60

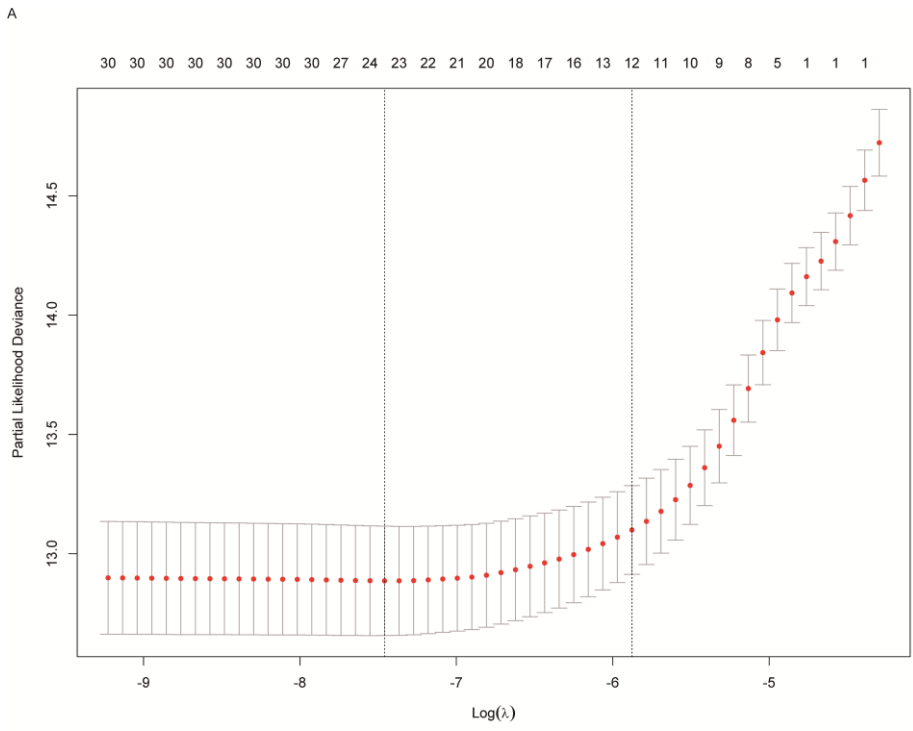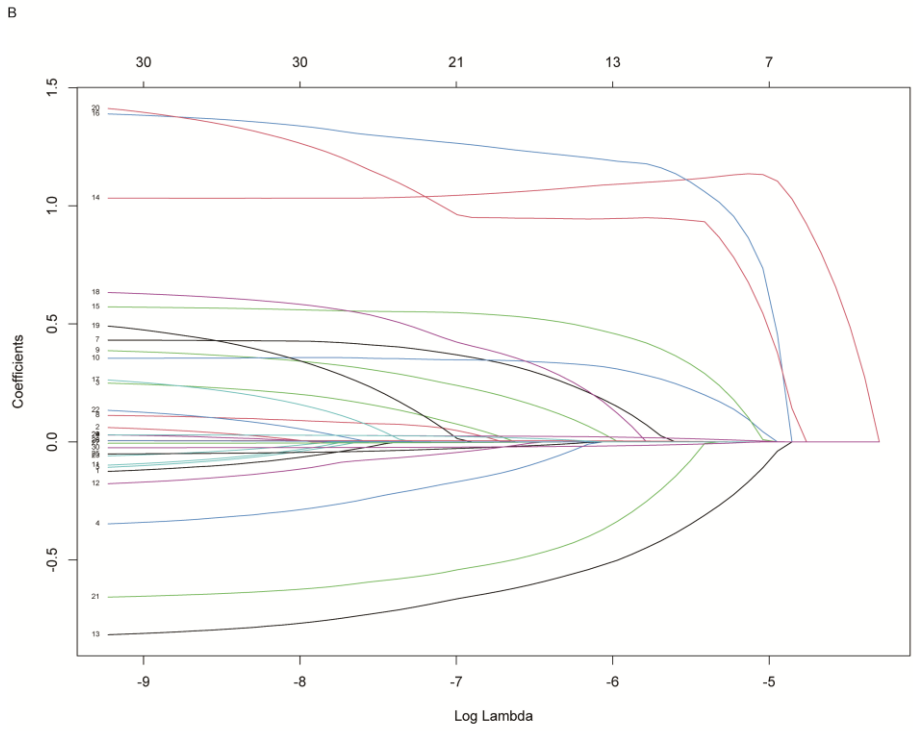



**Supplemental Figure 11. Variable selection by LASSO method for 30-day prognostic model in imputation dataset 4**

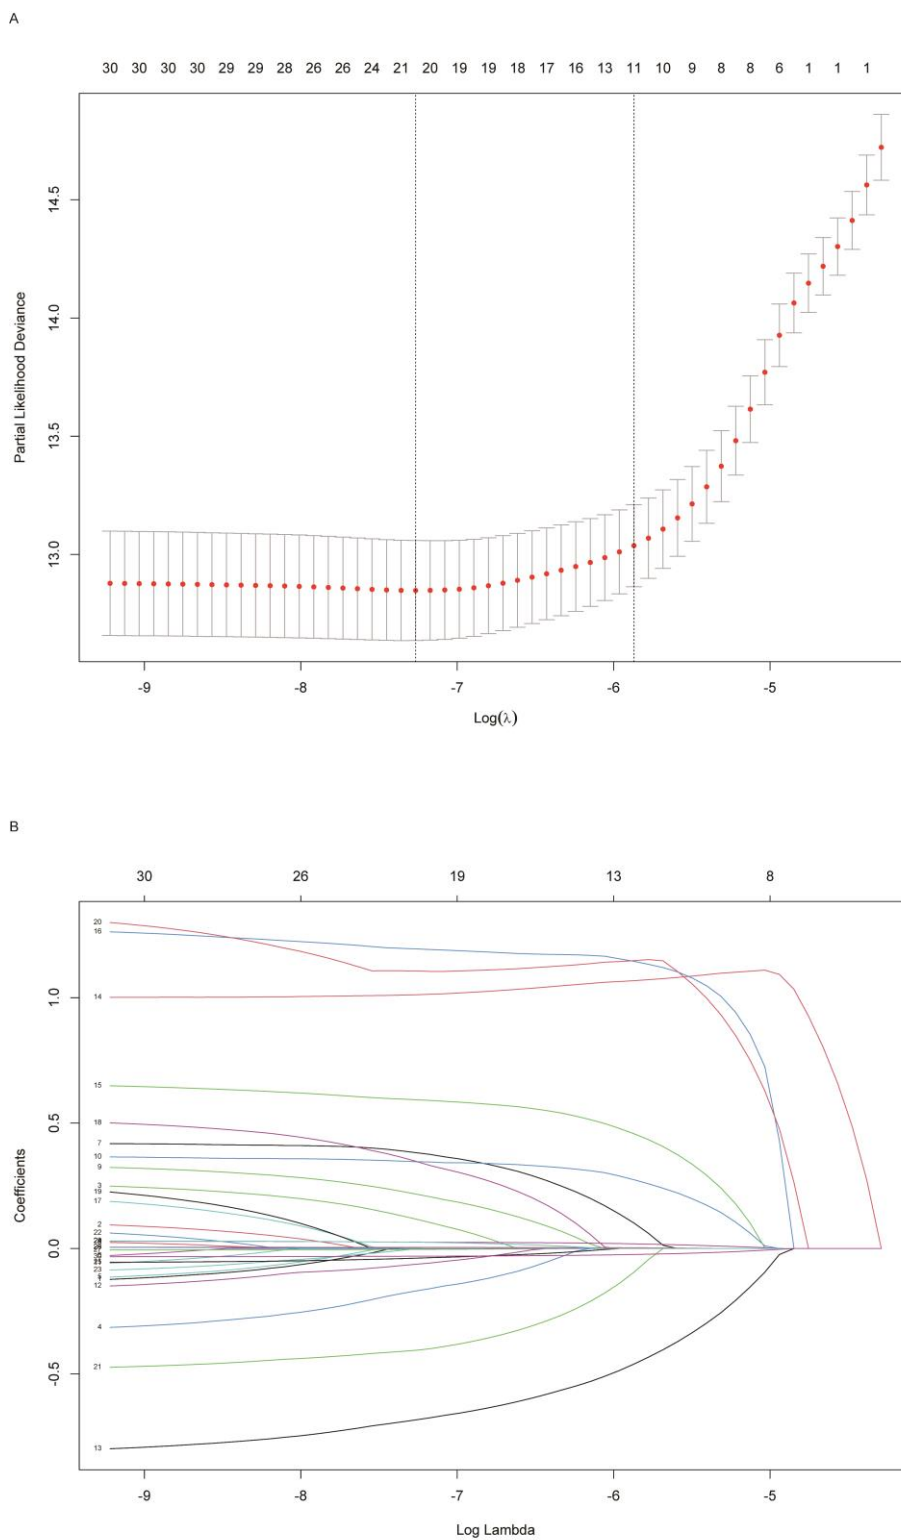

### Supplemental Figure 12. Variable selection by LASSO method for 30-day prognostic model in imputation dataset 5

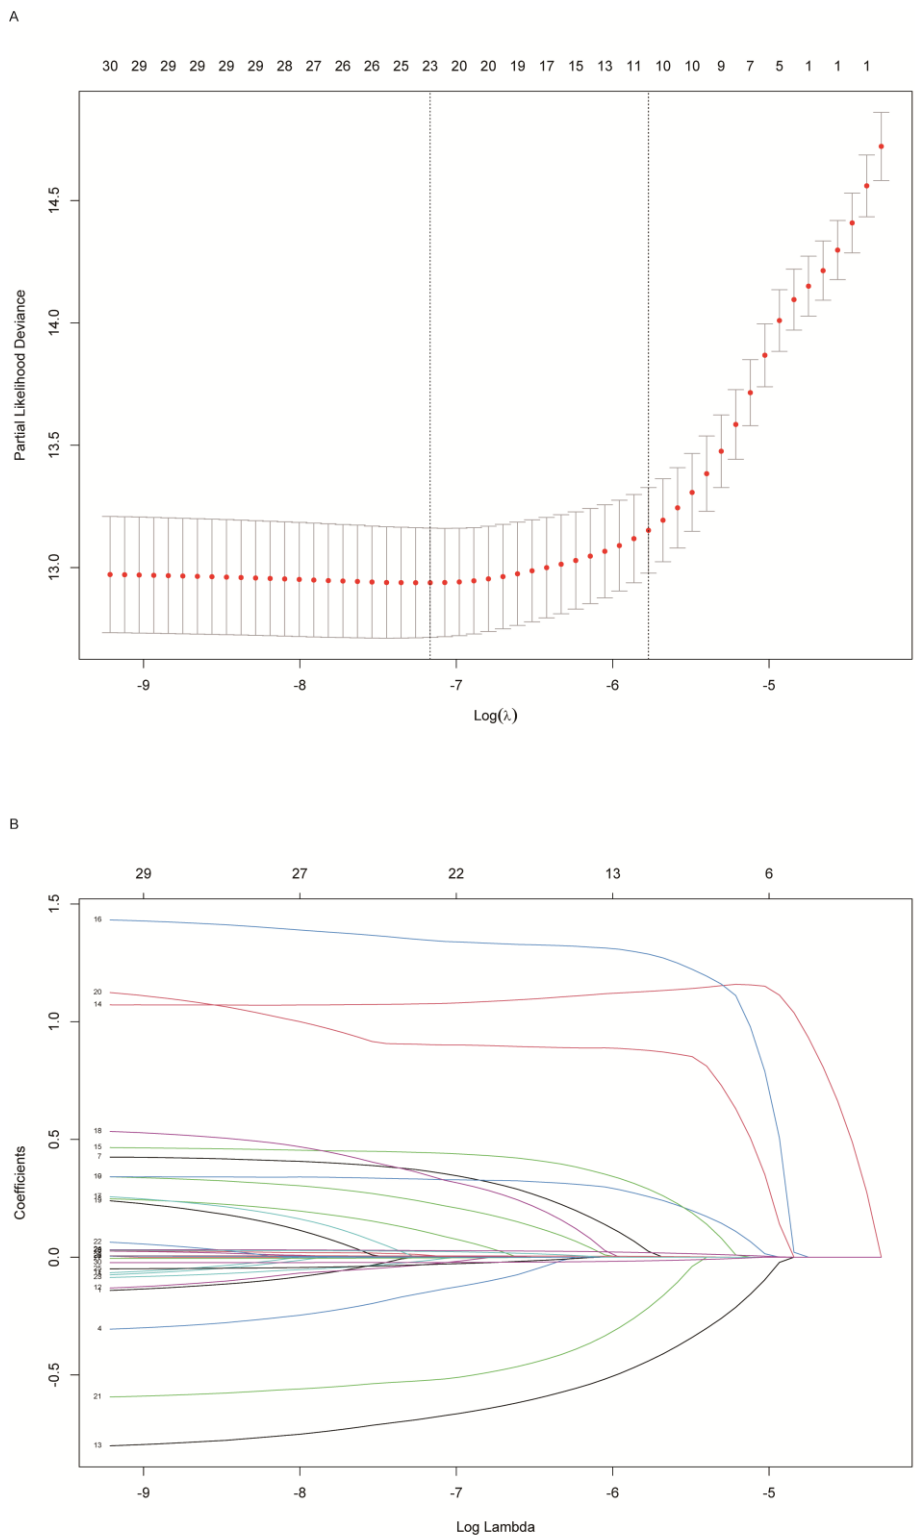

**Supplemental Figure 13. Relative importance of selected predictors for 30-day mortality**

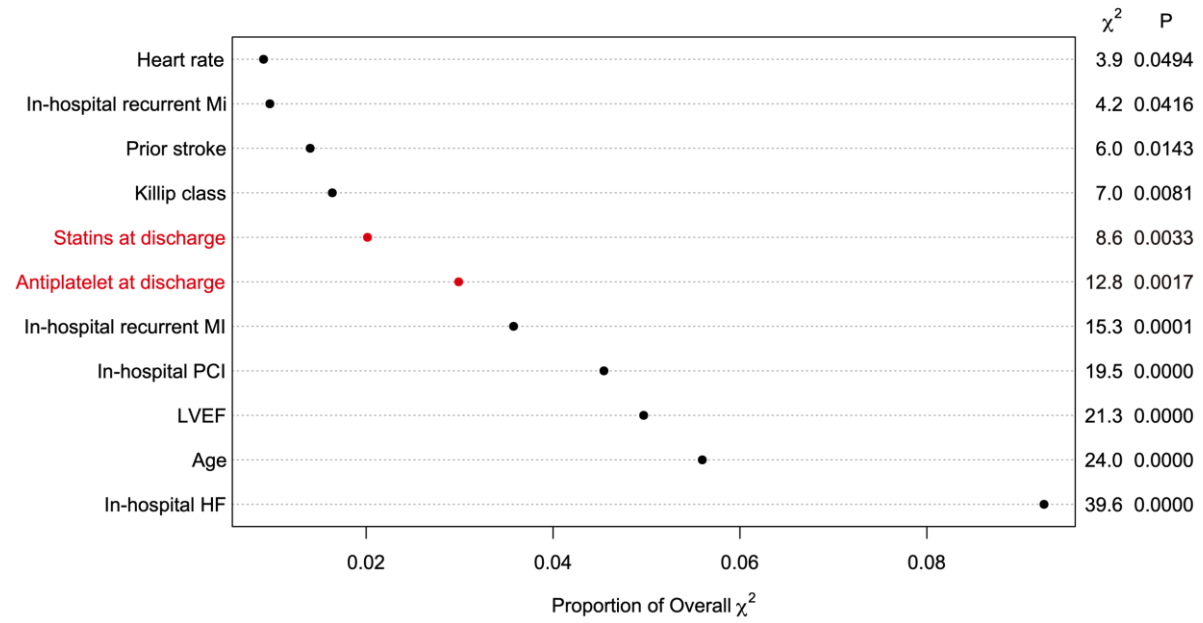

### Supplemental Figure 14. Variable selection by LASSO method for 2-year prognostic model in imputation dataset 1

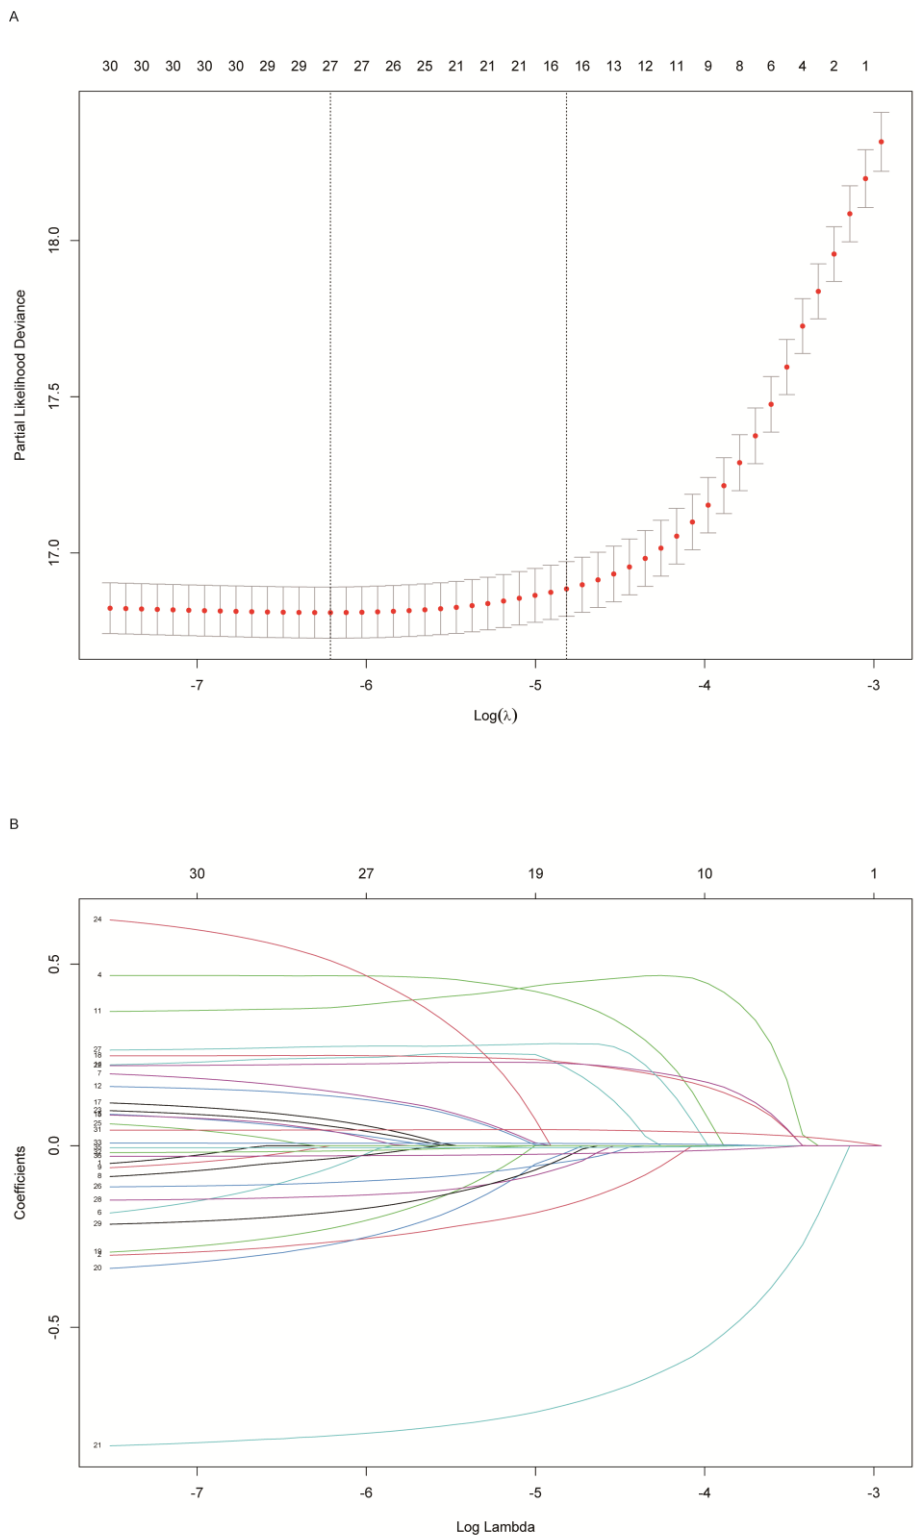

**Supplemental Figure 15. Variable selection by LASSO method for 2-year prognostic model in imputation dataset 2**

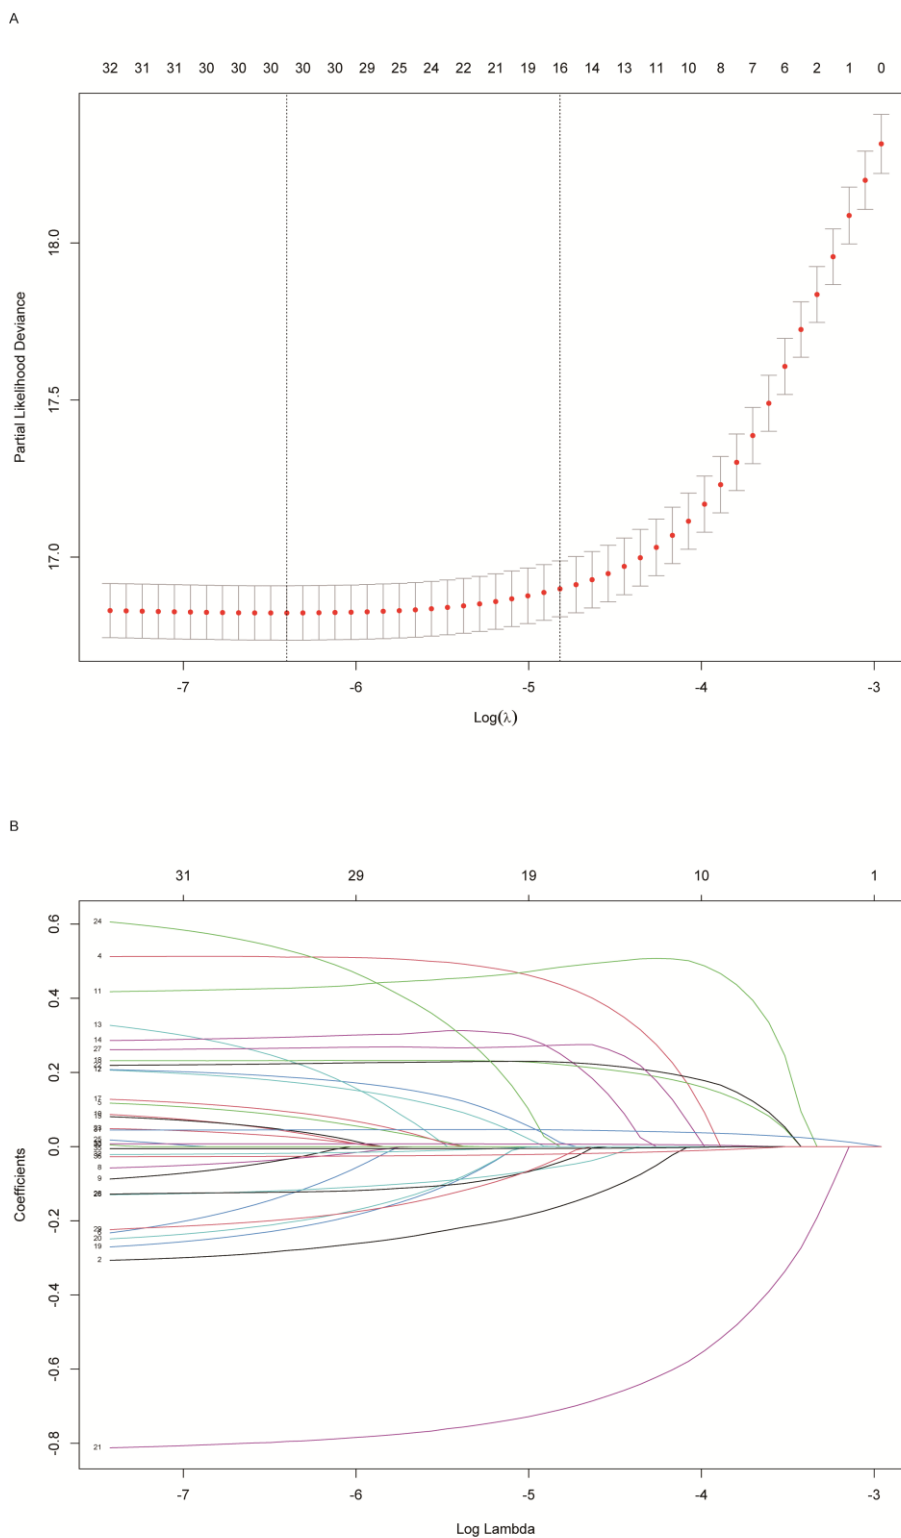



Supplemental Figure 17. Variable selection by LASSO method for 2-year prognostic model in imputation dataset 4

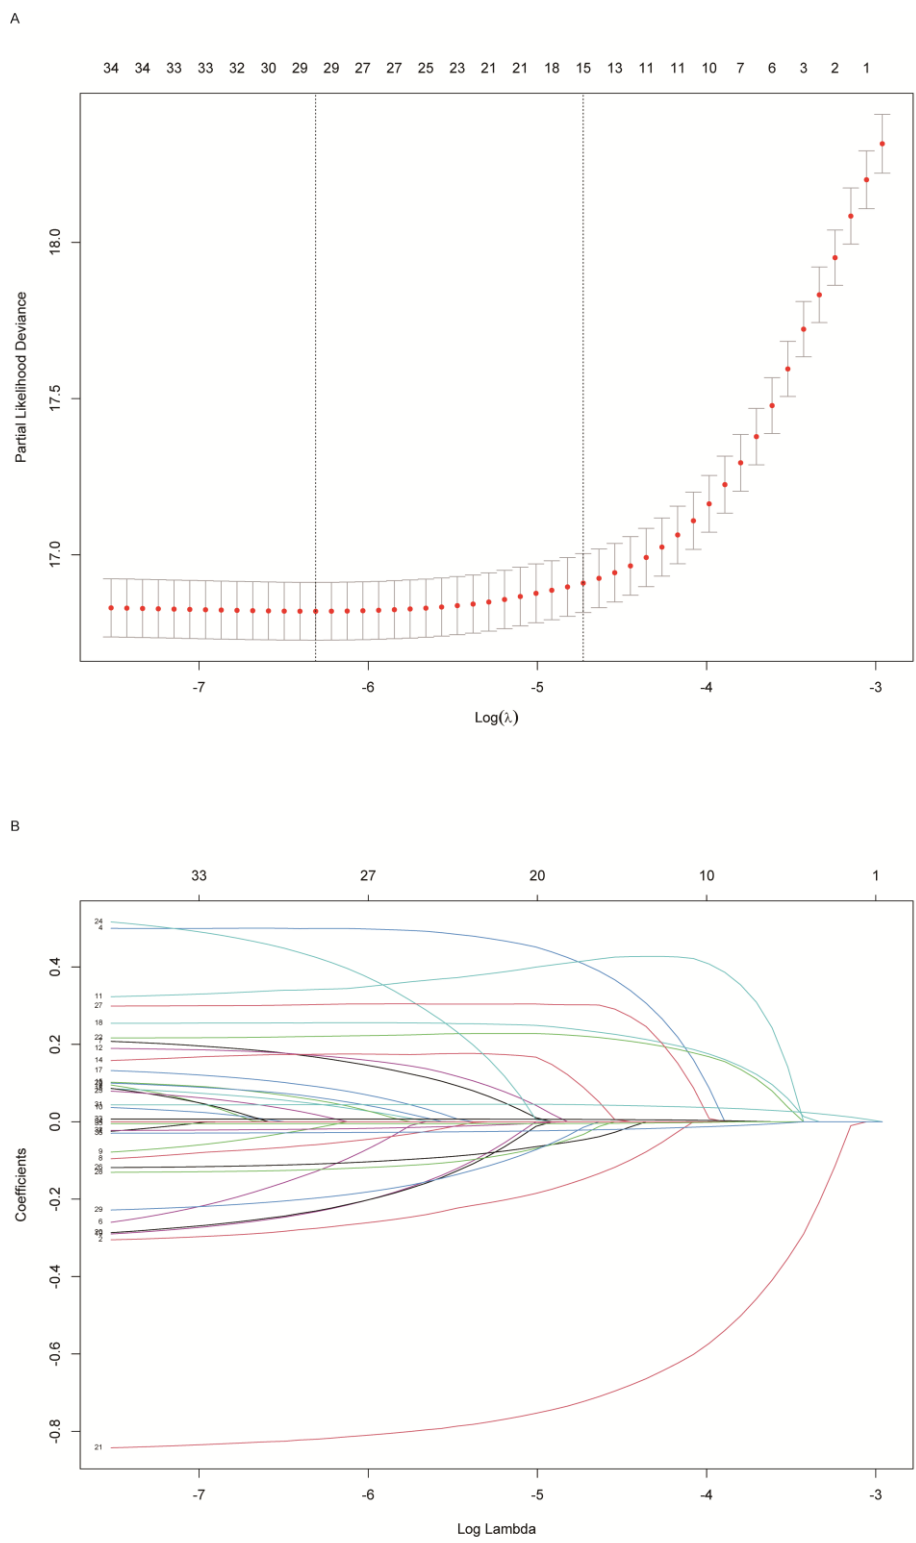

### Supplemental Figure 18. Variable selection by LASSO method for 2-year prognostic model in imputation dataset 5

1  
2  
3  
4  
5  
6  
7  
8  
9  
10  
11  
12  
13  
14  
15  
16  
17  
18  
19  
20  
21  
22  
23  
24  
25  
26  
27  
28  
29  
30  
31  
32  
33  
34  
35  
36  
37  
38  
39  
40  
41  
42  
43  
44  
45  
46  
47  
48  
49  
50  
51  
52  
53  
54  
55  
56  
57  
58  
59  
60

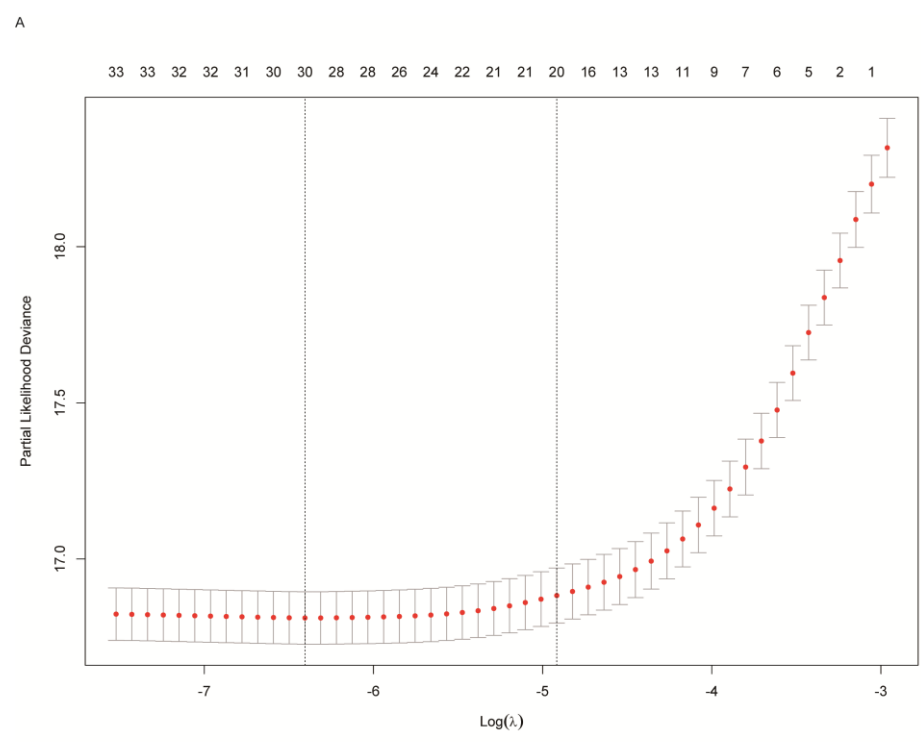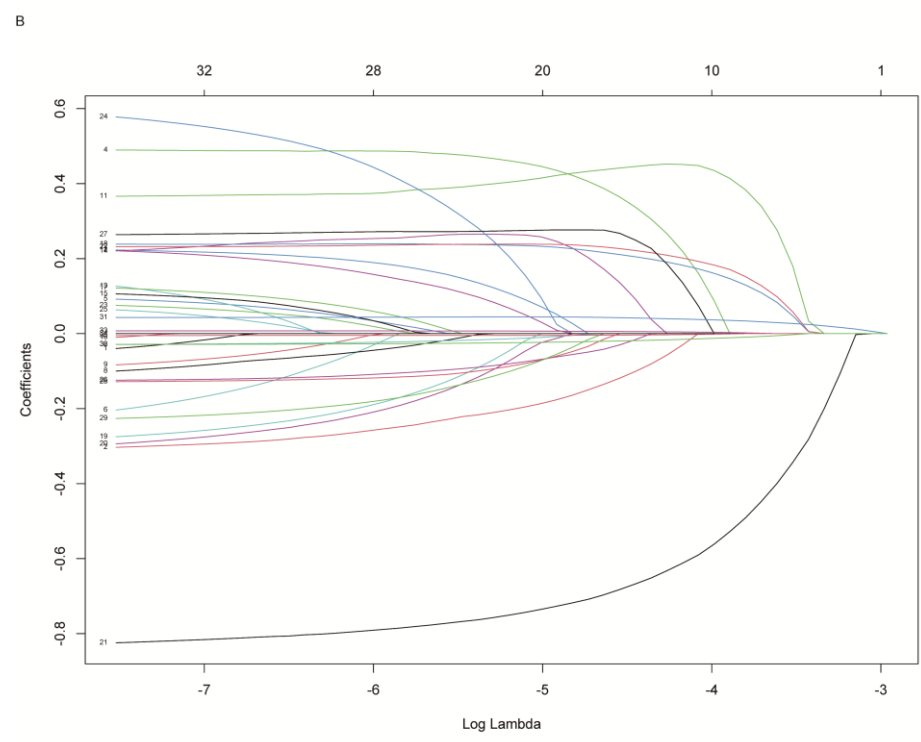



**Supplemental Figure 19. Relative importance of selected predictors for 2-year mortality**

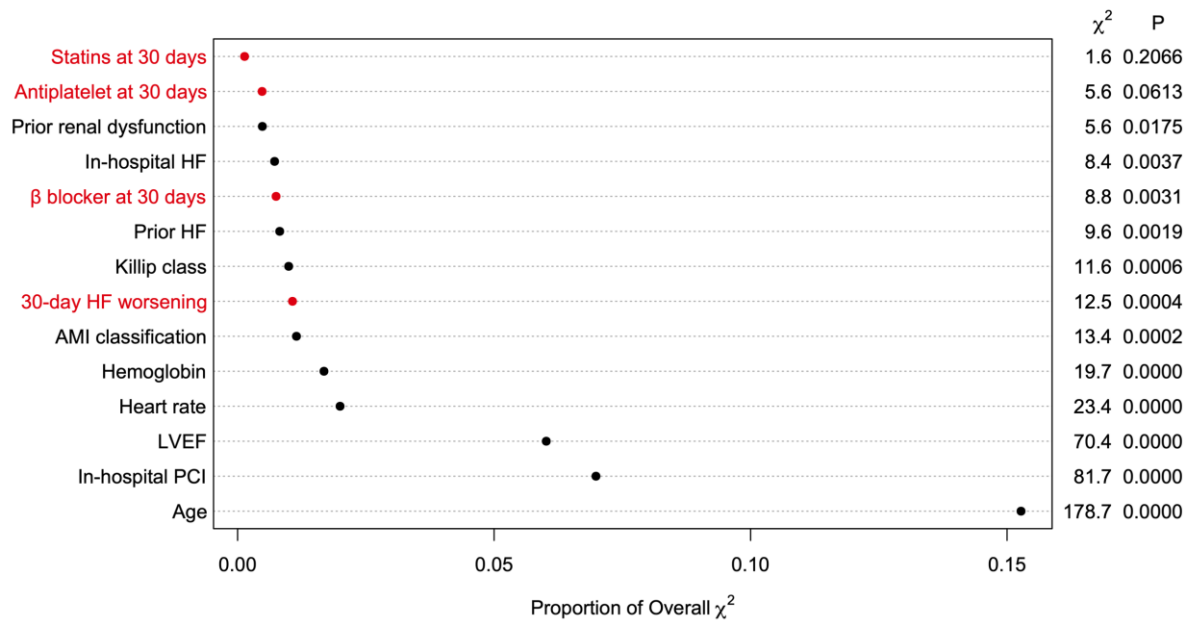

### Supplemental Figure 20. Comparisons of clinical utility between models with or without adverse events and medications

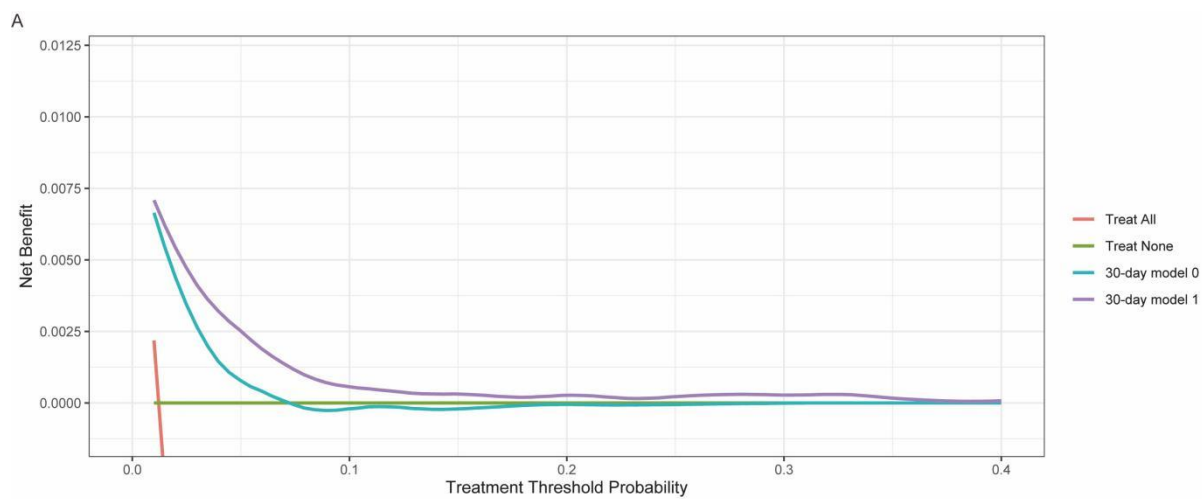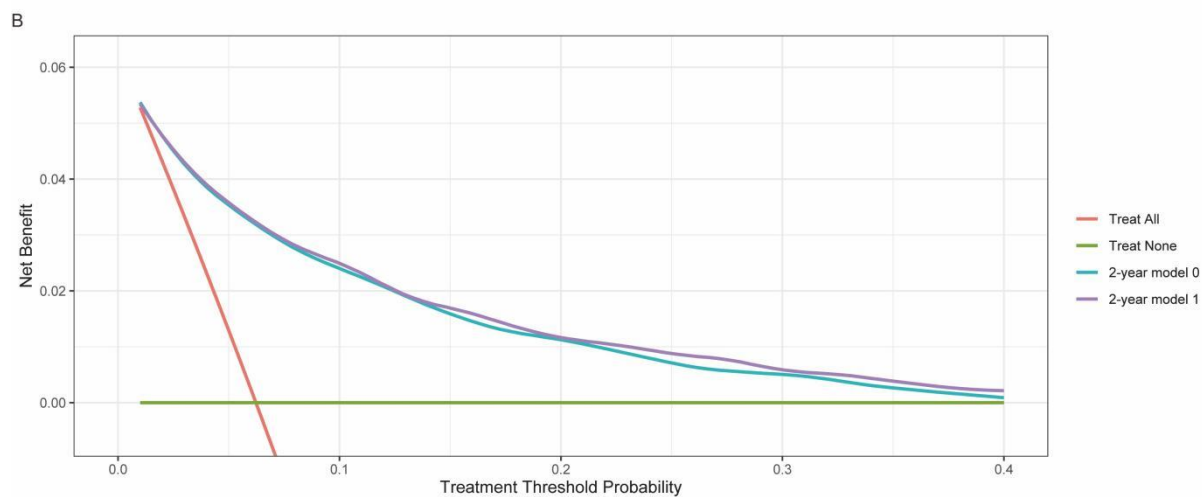

**Supplemental Figure 21. Comparisons of clinical utility between models with or without hospital level**

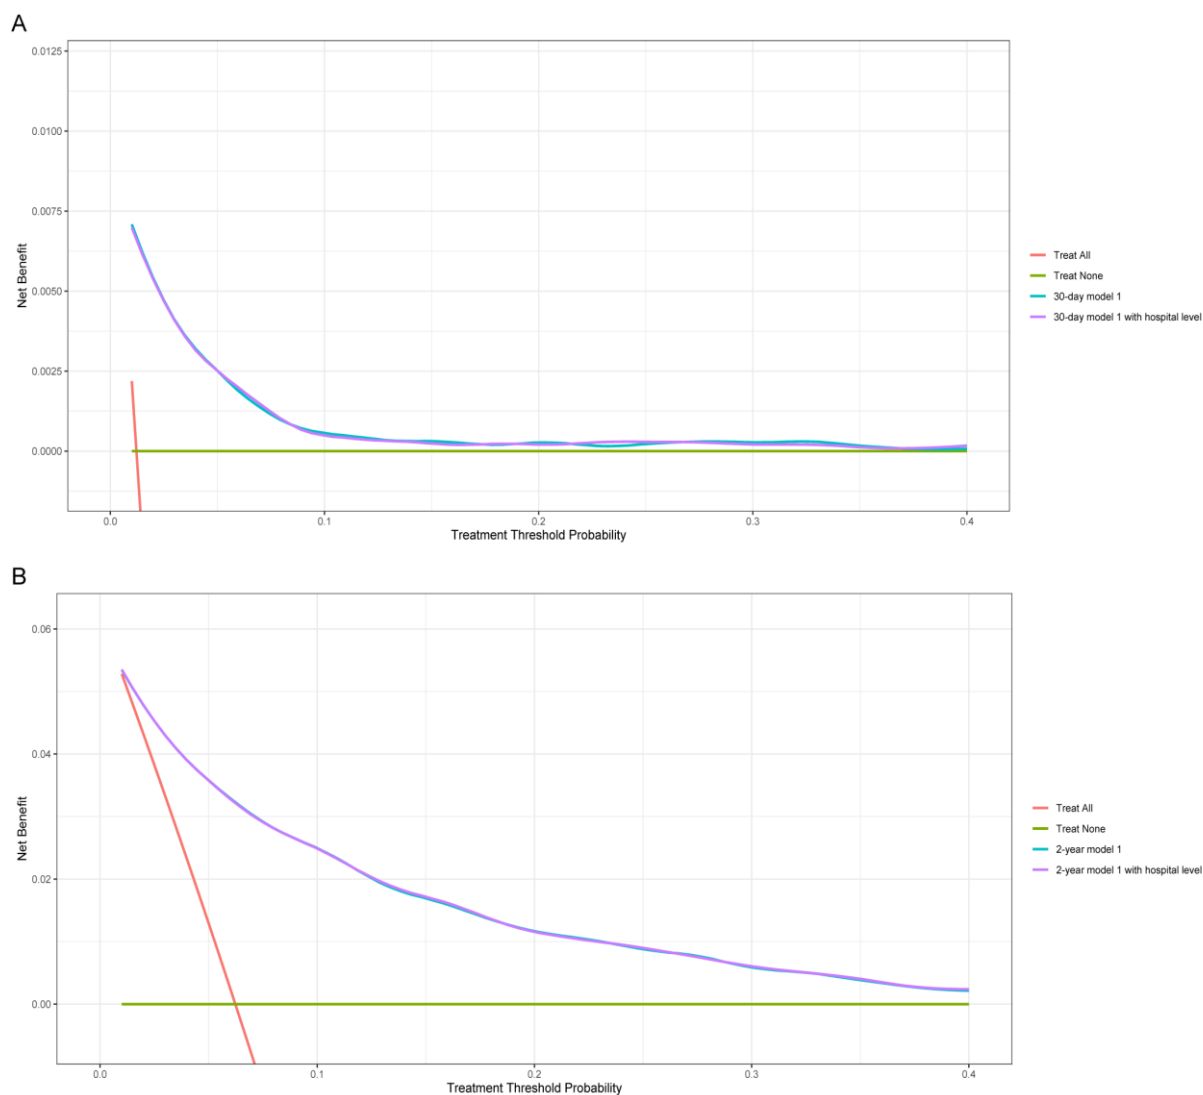

1  
2  
3  
4  
5  
6  
7  
8  
9  
10  
11  
12  
13  
14  
15  
16  
17  
18  
19  
20  
21  
22  
23  
24  
25  
26  
27  
28  
29  
30  
31  
32  
33  
34  
35  
36  
37  
38  
39  
40  
41  
42  
43  
44  
45  
46  
47  
48  
49  
50  
51  
52  
53  
54  
55  
56  
57  
58  
59  
60

**Supplemental Figure 22. Comparisons of clinical utility between models and GRACE 1.0 score**

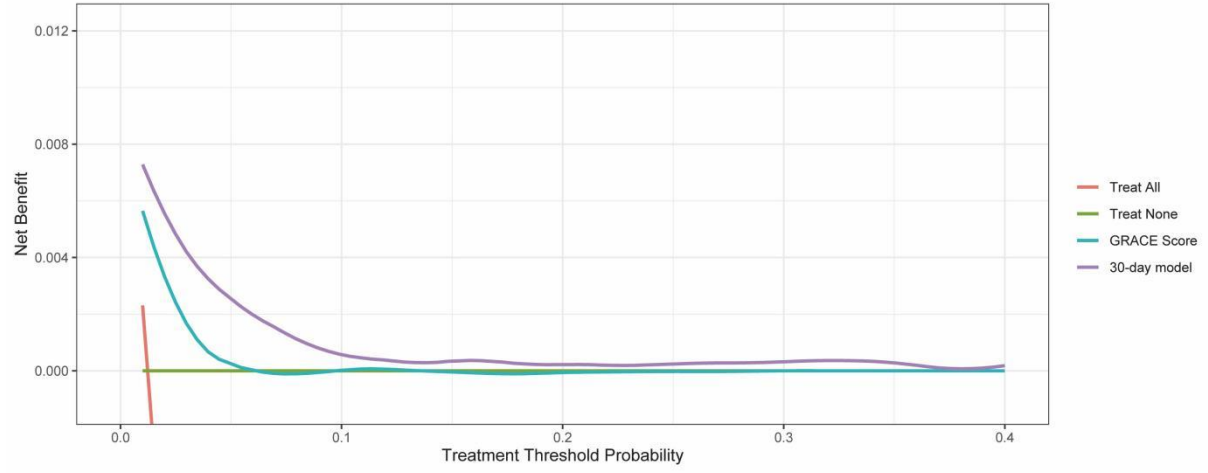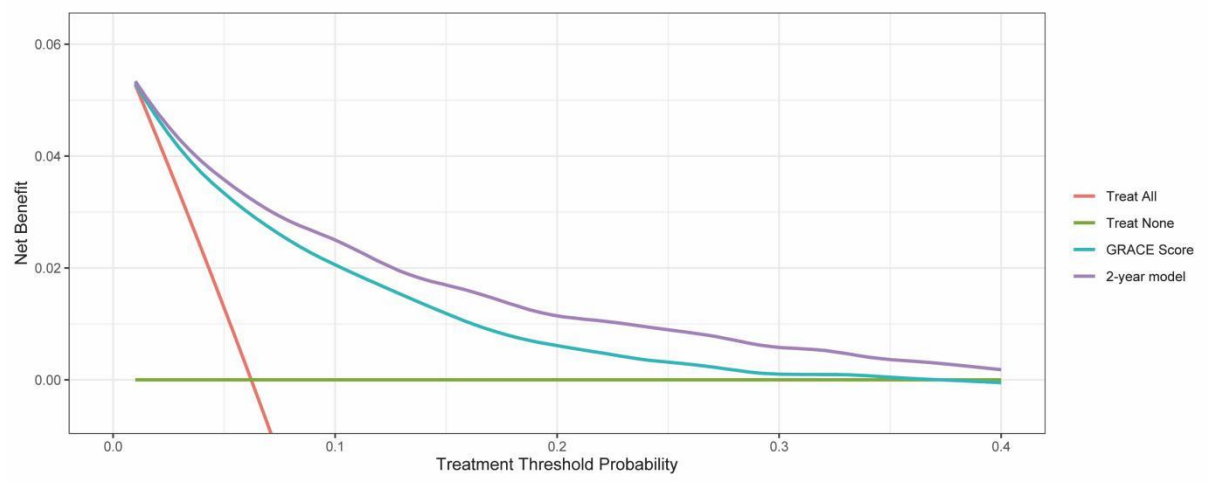

**Supplemental Figure 23. Comparisons of clinical utility between models and GRACE 2.0 score**

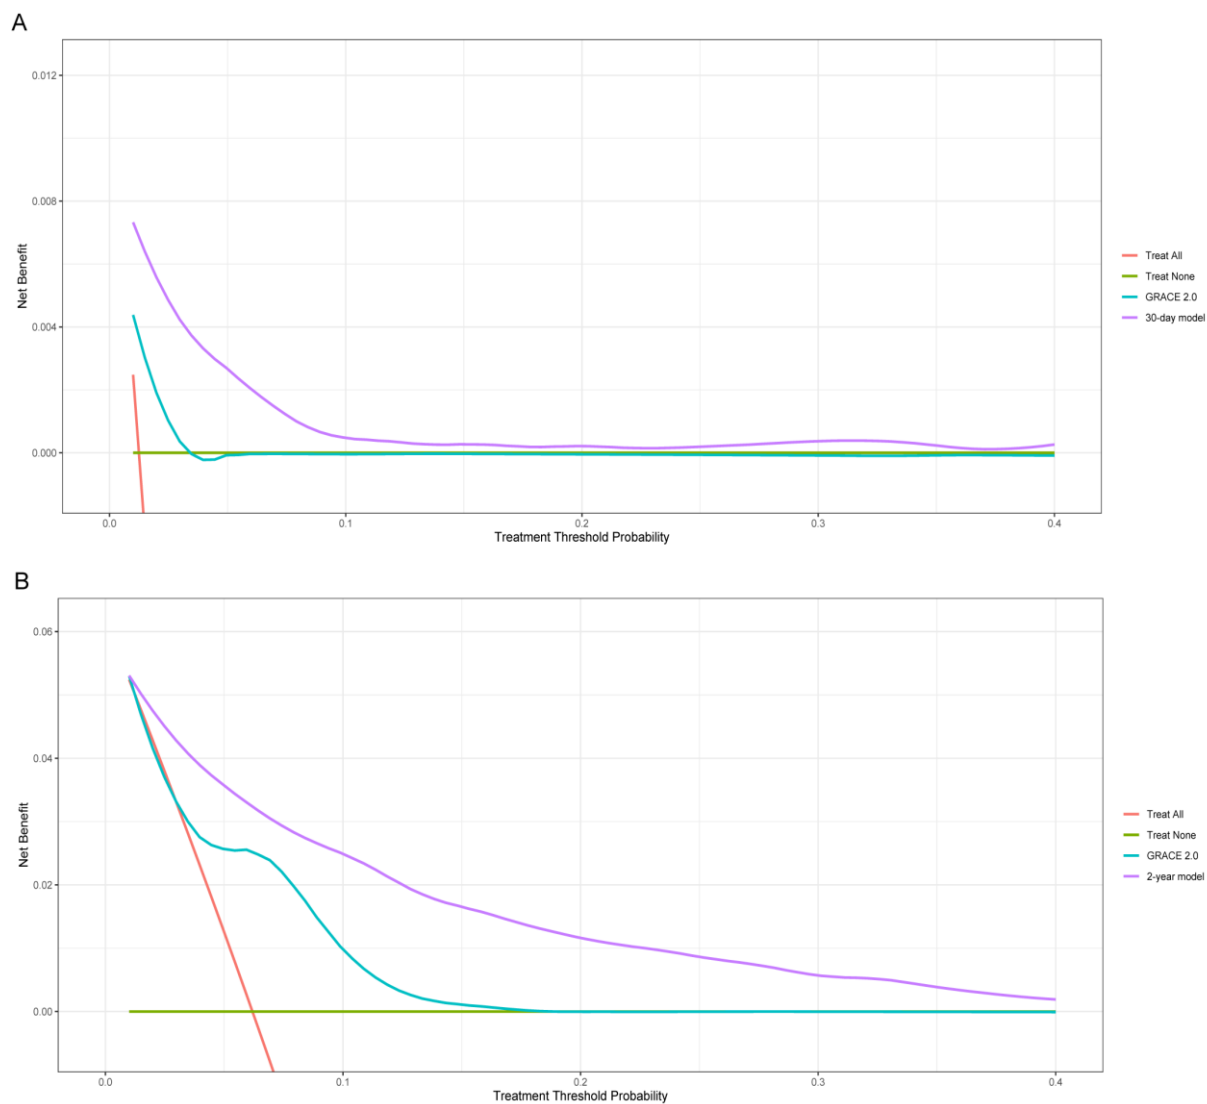

### Supplemental Figure 24. Calibration curves of 30-day prognostic nomogram

A

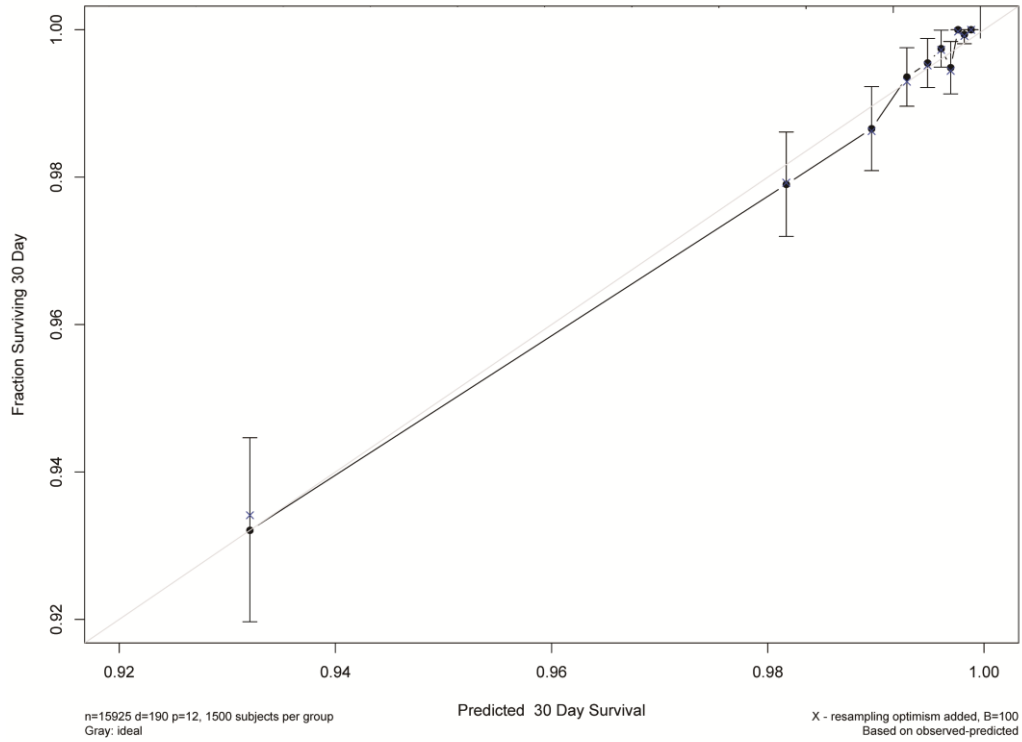

B

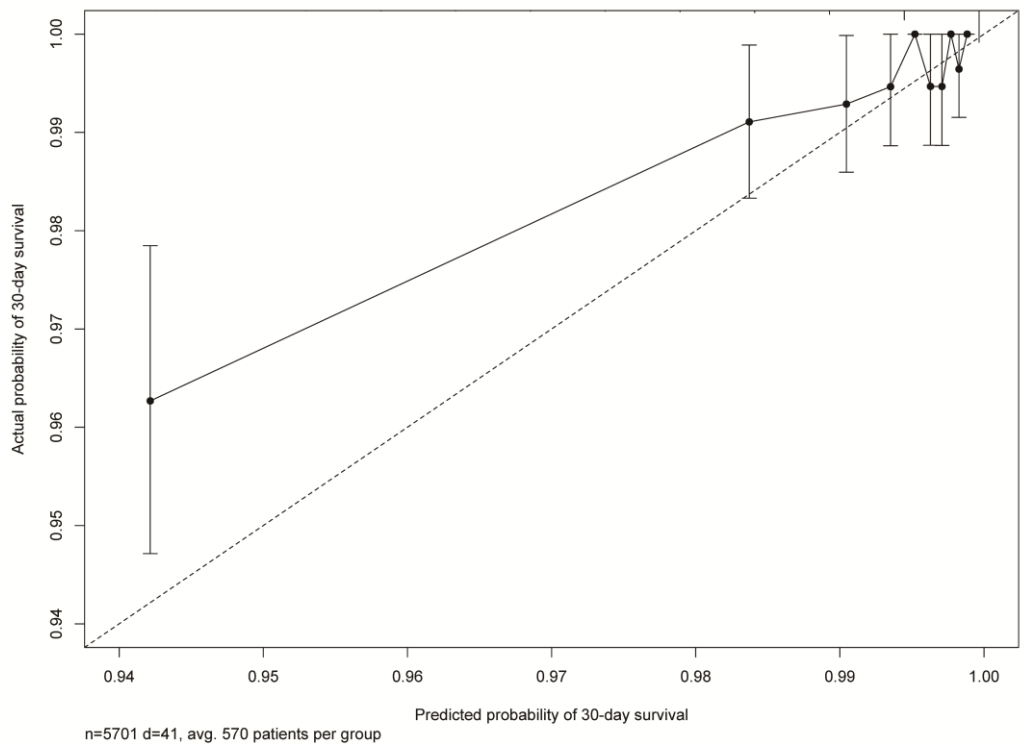

**Supplemental Figure 25. Calibration curves of 2-year prognostic nomogram**

A

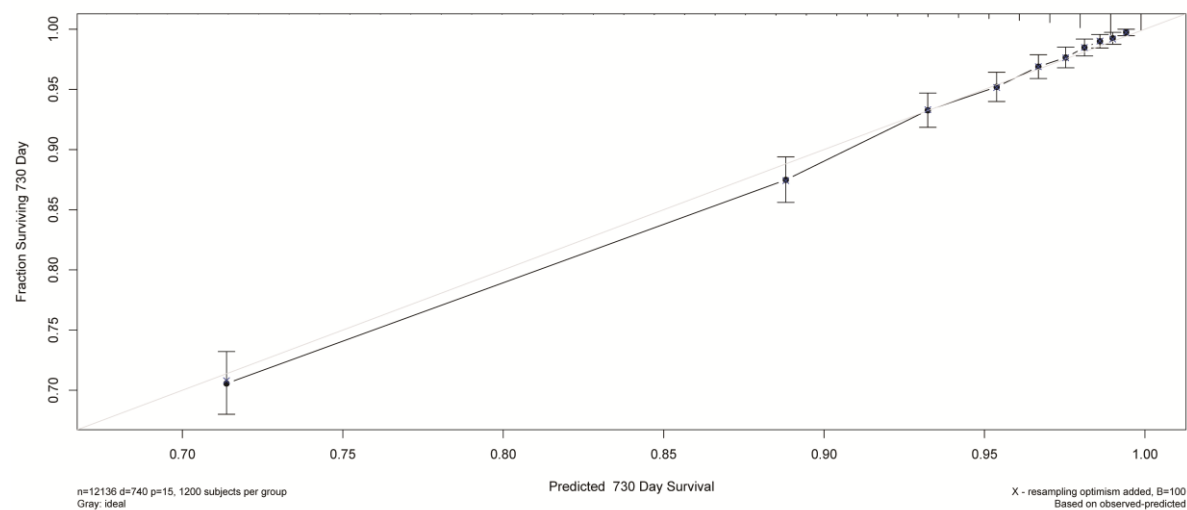

B

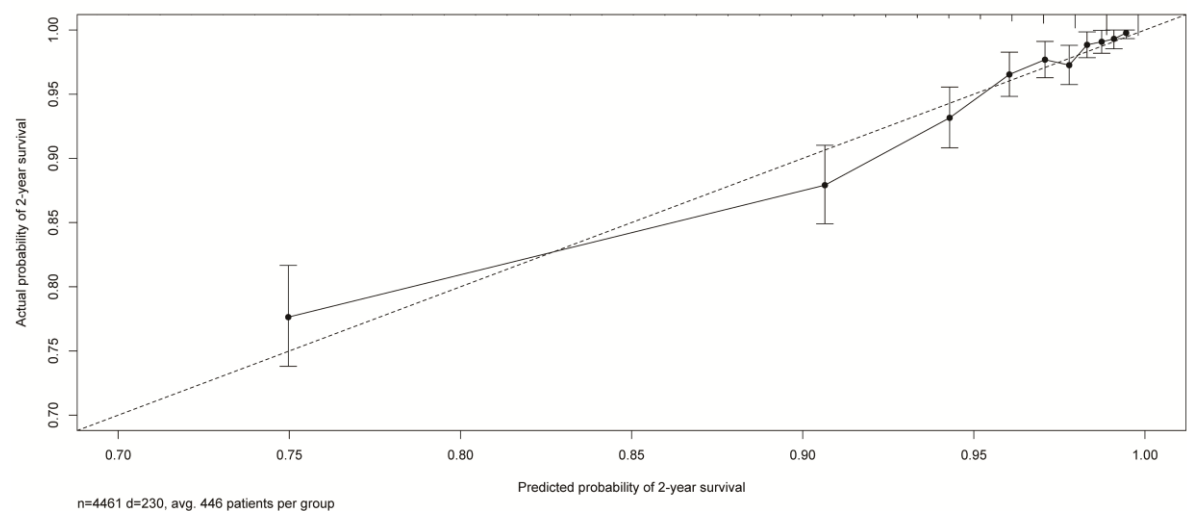

1  
2  
3  
4  
5  
6  
7  
8  
9  
10  
11  
12  
13  
14  
15  
16  
17  
18  
19  
20  
21  
22  
23  
24  
25  
26  
27  
28  
29  
30  
31  
32  
33  
34  
35  
36  
37  
38  
39  
40  
41  
42  
43  
44  
45  
46  
**TRIPOD Checklist: Prediction Model Development**

| Section                   | Item | Checklist description                                                                                                                                                                            | Reported on Page Number/Line Number | Reported on Section/Paragraph |
|---------------------------|------|--------------------------------------------------------------------------------------------------------------------------------------------------------------------------------------------------|-------------------------------------|-------------------------------|
| <b>Title and abstract</b> |      |                                                                                                                                                                                                  |                                     |                               |
| Title                     | 1    | Identify the study as developing and/or validating a multivariable prediction model, the target population, and the outcome to be predicted.                                                     |                                     |                               |
| Abstract                  | 2    | Provide a summary of objectives, study design, setting, participants, sample size, predictors, outcome, statistical analysis, results, and conclusions.                                          |                                     |                               |
| <b>Introduction</b>       |      |                                                                                                                                                                                                  |                                     |                               |
| Background and objectives | 3a   | Explain the medical context (including whether diagnostic or prognostic) and rationale for developing or validating the multivariable prediction model, including references to existing models. |                                     |                               |
|                           | 3b   | Specify the objectives, including whether the study describes the development or validation of the model or both.                                                                                |                                     |                               |
| <b>Methods</b>            |      |                                                                                                                                                                                                  |                                     |                               |
| Source of data            | 4a   | Describe the study design or source of data (e.g., randomized trial, cohort, or registry data), separately for the development and validation data sets, if applicable.                          |                                     |                               |
|                           | 4b   | Specify the key study dates, including start of accrual; end of accrual; and, if applicable, end of follow-up.                                                                                   |                                     |                               |
| Participants              | 5a   | Specify key elements of the study setting (e.g., primary care, secondary care, general population) including number and location of centres.                                                     |                                     |                               |
|                           | 5b   | Describe eligibility criteria for participants.                                                                                                                                                  |                                     |                               |
|                           | 5c   | Give details of treatments received, if relevant.                                                                                                                                                |                                     |                               |
| Outcome                   | 6a   | Clearly define the outcome that is predicted by the prediction model, including how and when assessed.                                                                                           |                                     |                               |
|                           | 6b   | Report any actions to blind assessment of the outcome to be predicted.                                                                                                                           |                                     |                               |
| Predictors                | 7a   | Clearly define all predictors used in developing or validating the multivariable prediction model, including how and when they were measured.                                                    |                                     |                               |
|                           | 7b   | Report any actions to blind assessment of predictors for the outcome and other predictors.                                                                                                       |                                     |                               |
| Sample size               | 8    | Explain how the study size was arrived at.                                                                                                                                                       |                                     |                               |



|                              |     |                                                                                                                                                                                                       |  |  |
|------------------------------|-----|-------------------------------------------------------------------------------------------------------------------------------------------------------------------------------------------------------|--|--|
| Missing data                 | 9   | Describe how missing data were handled (e.g., complete-case analysis, single imputation, multiple imputation) with details of any imputation method.                                                  |  |  |
| Statistical analysis methods | 10a | Describe how predictors were handled in the analyses.                                                                                                                                                 |  |  |
|                              | 10b | Specify type of model, all model-building procedures (including any predictor selection), and method for internal validation.                                                                         |  |  |
|                              | 10d | Specify all measures used to assess model performance and, if relevant, to compare multiple models.                                                                                                   |  |  |
| Risk groups                  | 11  | Provide details on how risk groups were created, if done.                                                                                                                                             |  |  |
| <b>Results</b>               |     |                                                                                                                                                                                                       |  |  |
| Participants                 | 13a | Describe the flow of participants through the study, including the number of participants with and without the outcome and, if applicable, a summary of the follow-up time. A diagram may be helpful. |  |  |
|                              | 13b | Describe the characteristics of the participants (basic demographics, clinical features, available predictors), including the number of participants with missing data for predictors and outcome.    |  |  |
| Model development            | 14a | Specify the number of participants and outcome events in each analysis.                                                                                                                               |  |  |
|                              | 14b | If done, report the unadjusted association between each candidate predictor and outcome.                                                                                                              |  |  |
| Model specification          | 15a | Present the full prediction model to allow predictions for individuals (i.e., all regression coefficients, and model intercept or baseline survival at a given time point).                           |  |  |
|                              | 15b | Explain how to use the prediction model.                                                                                                                                                              |  |  |
| Model performance            | 16  | Report performance measures (with CIs) for the prediction model.                                                                                                                                      |  |  |
| <b>Discussion</b>            |     |                                                                                                                                                                                                       |  |  |
| Limitations                  | 18  | Discuss any limitations of the study (such as nonrepresentative sample, few events per predictor, missing data).                                                                                      |  |  |
| Interpretation               | 19b | Give an overall interpretation of the results, considering objectives, limitations, and results from similar studies, and other relevant evidence.                                                    |  |  |
| Implications                 | 20  | Discuss the potential clinical use of the model and implications for future research.                                                                                                                 |  |  |
| <b>Other information</b>     |     |                                                                                                                                                                                                       |  |  |
| Supplementary information    | 21  | Provide information about the availability of supplementary resources, such as study protocol, Web calculator, and data sets.                                                                         |  |  |
| Funding                      | 22  | Give the source of funding and the role of the funders for the present study.                                                                                                                         |  |  |

1  
2  
3  
4  
5  
6  
7  
8  
9  
10  
11  
12  
13  
14  
15  
16  
17  
18  
19  
20  
21  
22  
23  
24  
25  
26  
27  
28  
29  
30  
31  
32  
33  
34  
35  
36  
37  
38  
39  
40  
41  
42  
43  
44  
45  
46

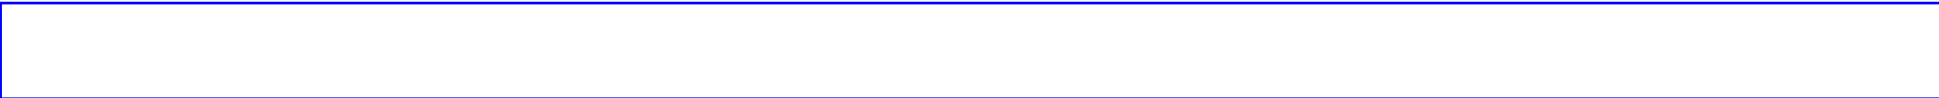

For peer review only
